# Supplementary material for: Novel 2-phenyloxypyrimidine derivative induces apoptosis and autophagy via inhibiting PI3K pathway and activating MAPK/ERK signaling in hepatocellular carcinoma cells
Source: PubMed Central journal article supplement (PMC6053381; doi:10.1038/s41598-018-29199-8), 2018-07-19

## Supplementary information

### Novel 2-phenyloxypyrimidine derivative induces apoptosis and autophagy via inhibiting PI3K pathway and activating MAPK/ERK signaling in hepatocellular carcinoma cells

Jing Wang <sup>1,+</sup>, Peng Sun <sup>2,+</sup>, Yijun Chen <sup>1\*</sup>, Hequan Yao <sup>2,\*</sup>, Shuzhen Wang <sup>1\*</sup>

#### Table of contents

|                                                                                                                                                                                                     |        |
|-----------------------------------------------------------------------------------------------------------------------------------------------------------------------------------------------------|--------|
| Materials & Methods.....                                                                                                                                                                            | 2-26   |
| Supplementary Table S1 PDGFR kinase inhibition of 2-phenyloxypyrimidine derivatives.....                                                                                                            | 27-28  |
| Supplementary Table S2 Anti-proliferative activity of 2-phenyloxypyrimidine derivatives on HCC cell lines determined by CellTiter-Glo luminescent cell viability assay (IC <sub>50</sub> , μM)..... | 29-30  |
| Supplementary Figure S1 Original gel images for Manuscript Fig. 5C.....                                                                                                                             | 31-33  |
| Supplementary Figure S2 Original gel images for Manuscript Fig. 6B.....                                                                                                                             | 34-35  |
| Supplementary Figure S3 Original gel images for Manuscript Fig. 6C.....                                                                                                                             | 36     |
| Supplementary Figure S4 Original gel images for Manuscript Fig. 6D.....                                                                                                                             | 37     |
| Supplementary Figure S5 Original gel images for Manuscript Fig. 6E.....                                                                                                                             | 38     |
| Supplementary Figure S6 Original gel images for Manuscript Fig. 7A.....                                                                                                                             | 39-44  |
| Supplementary Figure S7 Original gel images for Manuscript Fig. 7B.....                                                                                                                             | 45-46  |
| Supplementary NMR and HRMS data for all compounds                                                                                                                                                   | 47-186 |

## Materials & Methods

### Chemical synthesis

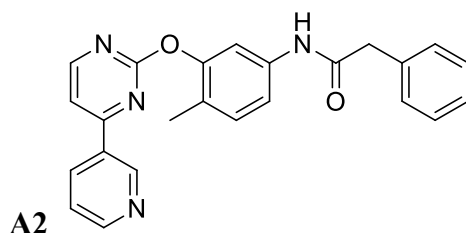

#### **N-(4-methyl-3-((4-(pyridin-3-yl)pyrimidin-2-yl)oxy)phenyl)-2-phenylacetamide:**

A round bottom flask was charged with 0.28 g of **8**, 0.13 g of benzoic acid and 10 mL DCM. 0.15 g HOBt and 0.21 g of EDCI were added to the solution at room temperature. After stirring for 2 hours, 20 mL distilled water was added and the mixture was extracted with 20 mL DCM for two times. The organic layers were combined and washed with water and brine. The solvent was removed under reduced pressure and the residue was purified through flash chromatography on silica gel with DCM:MeOH = 100:1(v:v) as eluent. 0.38 g of **A2** was obtained in the yield of 96%. HPLC  $R_t$  = 13.3 min, purity: 99%;  $^1\text{H NMR}$ (300 MHz,  $\text{CDCl}_3$ )  $\delta$  9.18 (d,  $J$  = 1.8 Hz, 1H), 8.69 – 8.68 (m, 1H), 8.32 (d,  $J$  = 8.0 Hz, 1H), 7.99 (s, 1H), 7.51 (s, 1H), 7.42 – 7.38 (m, 2H), 7.36 – 7.27 (m, 5H), 7.25 – 7.16 (m, 2H), 3.64 (s, 2H), 2.12 (s, 3H) ppm;  $^{13}\text{C NMR}$ (75 MHz,  $\text{CDCl}_3$ )  $\delta$  169.2, 164.0, 165.3, 164.6, 160.6, 151.9, 151.3, 148.5, 136.9, 134.9, 134.5, 131.8, 131.2, 127.5, 126.4, 123.8, 117.0, 113.6, 111.6, 44.6, 15.9 ppm; HRMS (ESI) calcd for  $[\text{C}_{24}\text{H}_{20}\text{N}_4\text{O}_2+\text{H}]^+$  397.1586, found 397.1465.

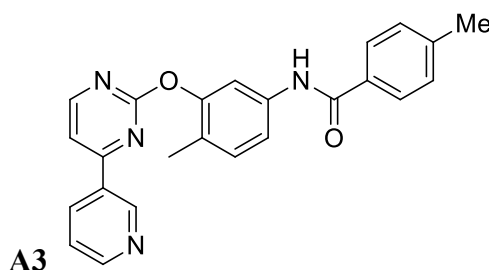

#### **N-(4-methyl-3-((4-(pyridin-3-yl)pyrimidin-2-yl)oxy)phenyl)-2-(4-methylphenyl)acetamide:**

A round bottom flask was charged with 0.28 g of **8**, 0.13 g of 4-methylbenzoic acid and 10 mL DCM. 0.15 g HOBt and 0.21 g of EDCI were added to the solution at room temperature. After stirring for 2 hours, 20 mL distilled water was added and the mixture was extracted with 20 mL DCM for two times. The organic layers were combined and washed with water and brine. The solvent was removed under reduced pressure and the residue was purified through flash chromatography on silica gel with DCM:MeOH = 100:1(v:v) as eluent. 0.33 g of **A3** was obtained in the yield of 85%. HPLC  $R_t$  = 11.8 min, purity: 99%;  $^1\text{H NMR}$ (300 MHz,  $\text{CDCl}_3$ )  $\delta$  9.20 (s, 1H), 8.70 (d,  $J$  = 3.4 Hz, 1H), 8.68 – 8.58 (m, 1H), 8.37 – 8.34 (m, 1H), 7.98 (d,  $J$  = 8.1 Hz 1H), 7.73 – 7.67 (m, 3H), 7.45 – 7.40 (m, 3H), 7.39 – 7.18 (m, 3H), 2.36 (s, 3H), 2.17 (s, 3H) ppm;  $^{13}\text{C NMR}$ (75 MHz,  $\text{CDCl}_3$ )  $\delta$  165.6, 165.4, 164.6, 160.6, 151.8, 151.4, 148.4, 142.3, 137.2, 135.0, 132.0, 131.8, 130.0, 129.4, 129.0, 127.0, 126.4, 123.9,

117.4, 114.0, 111.6, 21.5, 16.0 ppm; HRMS (ESI) calcd for  $[C_{24}H_{20}N_4O_2+H]^+$  397.1586, found 397.1665.

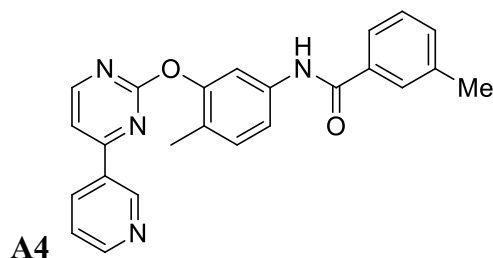

**3-methyl-N-(4-methyl-3-((4-(pyridin-3-yl)pyrimidin-2-yl)oxy)phenyl)benzamide:**

A round bottom flask was charged with 0.28 g of **8**, 0.13 g of 3-methylbenzoic acid and 10 mL DCM. 0.15 g HOBt and 0.21 g of EDCI were added to the solution at room temperature. After stirring for 2 hours, 20 mL distilled water was added and the mixture was extracted with 20 mL DCM for two times. The organic layers were combined and washed with water and brine. The solvent was removed under reduced pressure and the residue was purified through flash chromatography on silica gel with DCM:MeOH = 100:1(v:v) as eluent. 0.35 g of **A4** was obtained in the yield of 90%. HPLC  $R_t$  = 12.0 min, purity: 99%;  $^1H$  NMR(300 MHz,  $CDCl_3$ )  $\delta$  9.12 (d,  $J$  = 1.2 Hz 1H), 8.61 (d,  $J$  = 3.5 Hz, 1H), 8.50 (d,  $J$  = 5.2 Hz, 1H), 8.27 (d,  $J$  = 8.0 Hz, 1H), 7.98 (d,  $J$  = 8.1 Hz 1H), 7.73 – 7.67 (m, 1H), 7.45 – 7.40 (m, 1H), 8.21 (s, 1H), 7.60 – 7.50 (s, 3H), 7.37 – 7.30 (m, 3H), 7.20 – 7.14 (m, 3H), 2.26 (s, 3H), 2.09 (s, 3H) ppm;  $^{13}C$  NMR(75 MHz,  $CDCl_3$ )  $\delta$  166.2, 165.3, 164.5, 160.6, 151.7, 151.4, 148.4, 138.4, 137.4, 135.0, 134.8, 132.4, 131.8, 131.3, 128.4, 127.9, 126.3, 124.2, 123.8, 117.6, 114.1, 111.6, 21.2, 15.9 ppm; HRMS (ESI) calcd for  $[C_{24}H_{20}N_4O_2+H]^+$  397.1586, found 397.1664.

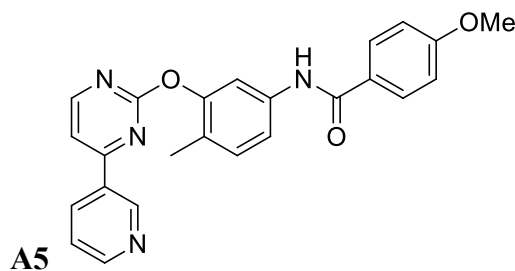

**4-methoxy-N-(4-methyl-3-((4-(pyridin-3-yl)pyrimidin-2-yl)oxy)phenyl)benzamide:**

A round bottom flask was charged with 0.28 g of **8**, 0.17 g of 4-methoxybenzoic acid and 10 mL DCM. 0.15 g HOBt and 0.21 g of EDCI were added to the solution at room temperature. After stirring for 2 hours, 20 mL distilled water was added and the mixture was extracted with 20 mL DCM for two times. The organic layers were combined and washed with water and brine. The solvent was removed under reduced pressure and the residue was purified through flash chromatography on silica gel with DCM:MeOH = 100:1(v:v) as eluent. 0.37 g of **A5** was obtained in the yield of 90%. HPLC  $R_t$  = 14.2 min, purity: 99%;  $^1H$  NMR(300 MHz,  $CDCl_3$ )  $\delta$  9.12 (d,  $J$  = 1.2 Hz 1H), 8.61 (d,  $J$  = 3.5 Hz, 1H), 8.50 (d,  $J$  = 5.2 Hz, 1H), 8.27 (d,  $J$  = 8.0 Hz, 1H), 7.98 (d,  $J$  = 8.1 Hz 1H), 7.73 – 7.67 (m, 1H), 7.45 – 7.40 (m, 1H), 8.21 (s, 1H), 7.60 – 7.50 (s, 3H), 7.37 – 7.30 (m, 3H), 7.20 – 7.14 (m, 3H), 2.26 (s, 3H), 2.09 (s, 3H) ppm;  $^{13}C$

NMR(75 MHz, CDCl<sub>3</sub>) δ 165.4, 164.7, 162.4, 160.6, 151.9, 151.4, 148.5, 137.3, 134.9, 131.8, 129.0, 127.0, 126.3, 123.8, 117.5, 114.0, 113.8, 111.6, 55.4, 16.0 ppm; HRMS (ESI) calcd for [C<sub>24</sub>H<sub>20</sub>N<sub>4</sub>O<sub>3</sub>+H]<sup>+</sup> 413.1535, found 413.1614.

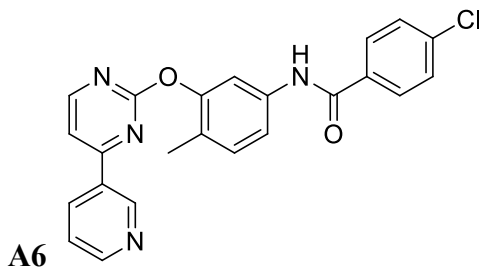

**4-chloro-N-(4-methyl-3-((4-(pyridin-3-yl)pyrimidin-2-yl)oxy)phenyl)benzamide:**

A round bottom flask was charged with 0.28 g of **8**, 0.17 g of 4-chlorobenzoic acid and 10 mL DCM. 0.15 g HOBt and 0.21 g of EDCI were added to the solution at room temperature. After stirring for 2 hours, 20 mL distilled water was added and the mixture was extracted with 20 mL DCM for two times. The organic layers were combined and washed with water and brine. The solvent was removed under reduced pressure and the residue was purified through flash chromatography on silica gel with DCM:MeOH = 100:1(v:v) as eluent. 0.36 g of **A6** was obtained in the yield of 87%. HPLC R<sub>t</sub> = 13.7 min, purity: 99%; <sup>1</sup>H NMR (300 MHz, CDCl<sub>3</sub>) δ 9.18 (s, 1H), 8.68 (d, J = 3.5 Hz, 1H), 8.57– 8.54 (m, 2H), 8.32 (d, J = 8.0 Hz, 1H), 7.74 (d, J = 8.5 Hz, 2H), 7.65 (s, 1H), 7.44 – 7.31 (m, 5H), 7.22 (d, J = 8.0 Hz, 1H), 2.16 (s, 3H) ppm; <sup>13</sup>C NMR (75 MHz, CDCl<sub>3</sub>) δ 165.3, 164.9, 160.6, 151.9, 151.4, 148.5, 137.9, 137.0, 134.9, 133.2, 131.7, 131.4, 128.8, 128.6, 126.8, 123.8, 117.6, 114.2, 111.7, 16.0 ppm; HRMS (ESI) calcd for [C<sub>23</sub>H<sub>17</sub>N<sub>4</sub>O<sub>2</sub>Cl+H]<sup>+</sup> 417.1040, found 417.1119.

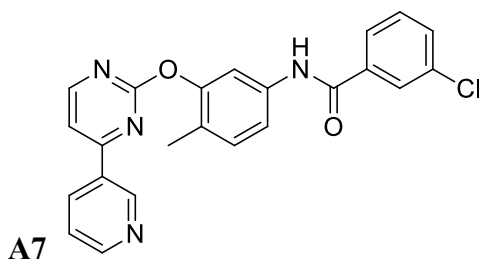

**3-chloro-N-(4-methyl-3-((4-(pyridin-3-yl)pyrimidin-2-yl)oxy)phenyl)benzamide:**

A round bottom flask was charged with 0.28 g of **8**, 0.17 g of 3-chlorobenzoic acid and 10 mL DCM. 0.15 g HOBt and 0.21 g of EDCI were added to the solution at room temperature. After stirring for 2 hours, 20 mL distilled water was added and the mixture was extracted with 20 mL DCM for two times. The organic layers were combined and washed with water and brine. The solvent was removed under reduced pressure and the residue was purified through flash chromatography on silica gel with DCM:MeOH = 100:1(v:v) as eluent. 0.38 g of **A7** was obtained in the yield of 91%. HPLC R<sub>t</sub> = 12.5 min, purity: 99%; <sup>1</sup>H NMR (300 MHz, CDCl<sub>3</sub>) δ 9.17 (s, 1H), 8.80 (s, 1H), 8.66 (d, J = 4.5 Hz, 1H), 8.55 (d, J = 5.1 Hz, 1H), 8.32 (d, J = 7.9 Hz, 2H), 7.78 (s, 1H), 7.67 (d, J = 7.9 Hz, 2H), 7.44 – 7.31 (m, 4H), 7.28 – 7.30 (m, 1H), 7.20 (d, J = 8.2 Hz, 1H), 2.14 (s, 3H) ppm; <sup>13</sup>C NMR (75 MHz, CDCl<sub>3</sub>) δ 165.3, 164.7, 164.4, 160.6, 152.0, 151.4, 148.6, 136.8, 136.7, 134.9, 134.8, 131.8, 131.4, 130.0, 127.4,

126.9, 125.2, 123.8, 117.6, 114.2, 111.7, 16.0 ppm; HRMS (ESI) calcd for  $[C_{23}H_{17}N_4O_2Cl+H]^+$  417.1040, found 417.1119.

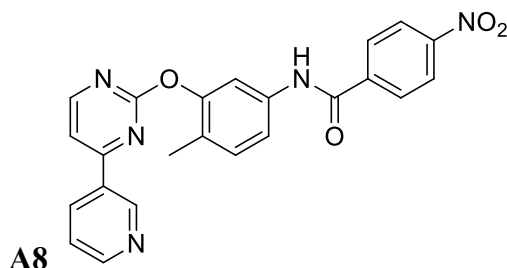

**N-(4-methyl-3-((4-(pyridin-3-yl)pyrimidin-2-yl)oxy)phenyl)-4-nitrobenzamide:** A round bottom flask was charged with 0.28 g of **8**, 0.18 g of 4-nitrobenzoic acid and 10 mL DCM. 0.15 g HOBt and 0.21 g of EDCI were added to the solution at room temperature. After stirring for 2 hours, 20 mL distilled water was added and the mixture was extracted with 20 mL DCM for two times. The organic layers were combined and washed with water and brine. The solvent was removed under reduced pressure and the residue was purified through flash chromatography on silica gel with DCM:MeOH = 50:1(v:v) as eluent. 0.32 g of **A8** was obtained in the yield of 75%. HPLC  $R_t$  = 9.8 min, purity: 99%;  $^1H$  NMR (300 MHz,  $CDCl_3$ )  $\delta$  9.22 (d,  $J$  = 1.7 Hz, 1H), 8.72 (dd,  $J$  = 4.8 Hz,  $J$  = 1.5 Hz, 1H), 8.33 (dt,  $J$  = 8.0 Hz,  $J$  = 1.7 Hz, 1H), 8.30 (d,  $J$  = 8.6 Hz, 2H), 8.14 (s, 1H), 8.01 (d,  $J$  = 8.7 Hz, 2H), 7.67 (s, 1H), 7.49 (d,  $J$  = 5.2 Hz, 1H), 7.46 – 7.39 (m, 2H), 7.30 (d,  $J$  = 8.3 Hz, 1H), 2.21 (s, 3H) ppm;  $^{13}C$  NMR (75 MHz,  $CDCl_3$ )  $\delta$  165.2, 164.6, 163.8, 160.6, 151.8, 151.4, 149.6, 148.5, 140.4, 136.4, 134.9, 131.7, 131.5, 128.4, 127.5, 123.9, 117.7, 114.4, 111.7, 16.0 ppm; HRMS (ESI) calcd for  $[C_{23}H_{17}N_5O_4+H]^+$  427.1281, found 427.1407.

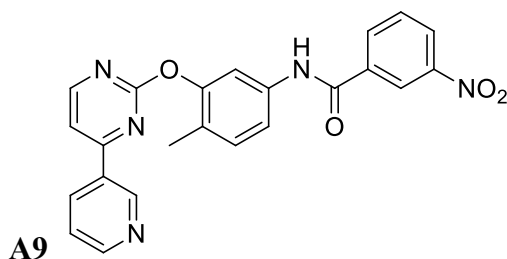

**N-(4-methyl-3-((4-(pyridin-3-yl)pyrimidin-2-yl)oxy)phenyl)-3-nitrobenzamide:** A round bottom flask was charged with 0.28 g of **8**, 0.18 g of 3-nitrobenzoic acid and 10 mL DCM. 0.15 g HOBt and 0.21 g of EDCI were added to the solution at room temperature. After stirring for 2 hours, 20 mL distilled water was added and the mixture was extracted with 20 mL DCM for two times. The organic layers were combined and washed with water and brine. The solvent was removed under reduced pressure and the residue was purified through flash chromatography on silica gel with DCM:MeOH = 50:1(v:v) as eluent. 0.33 g of **A9** was obtained in the yield of 77%. HPLC  $R_t$  = 8.1 min, purity: 99%;  $^1H$  NMR (300 MHz,  $CDCl_3$ )  $\delta$  9.27 (s, 1H), 9.16 (d,  $J$  = 1.5 Hz, 1H), 8.67 – 8.66 (m, 2H), 8.57 (d,  $J$  = 5.2 Hz, 1H), 8.32 – 8.20 (m, 3H), 7.65 (d,  $J$  = 1.3 Hz, 1H), 7.57 (d,  $J$  = 8.0 Hz, 1H), 7.46 – 7.37 (m, 3H), 7.20 (d,  $J$  = 8.3 Hz, 1H), 2.13 (s, 3H) ppm;  $^{13}C$  NMR (75 MHz,  $CDCl_3$ )  $\delta$  165.2, 164.6, 163.6, 160.6, 151.9, 151.4, 148.5, 148.0, 136.6, 136.4, 134.9, 133.6, 131.7, 131.4, 129.9, 127.2,

126.2, 123.9, 122.0, 117.9, 114.5, 111.7, 16.0 ppm; HRMS (ESI) calcd for  $[C_{23}H_{17}N_5O_4+H]^+$  427.1281, found 427.1405.

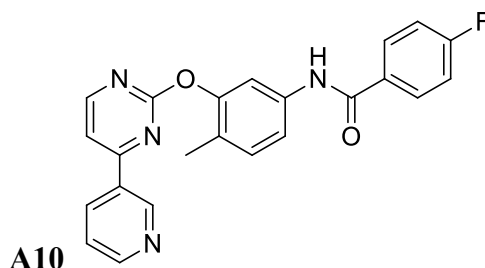

**4-fluoro-N-(4-methyl-3-((4-(pyridin-3-yl)pyrimidin-2-yl)oxy)phenyl)benzamide:**

A round bottom flask was charged with 0.28 g of **8**, 0.15 g of 4-fluorobenzoic acid and 10 mL DCM. 0.15 g HOBt and 0.21 g of EDCI were added to the solution at room temperature. After stirring for 2 hours, 20 mL distilled water was added and the mixture was extracted with 20 mL DCM for two times. The organic layers were combined and washed with water and brine. The solvent was removed under reduced pressure and the residue was purified through flash chromatography on silica gel with DCM:MeOH = 50:1(v:v) as eluent. 0.38 g of **A10** was obtained in the yield of 95%. HPLC  $R_t$  = 11.9 min, purity: 98%;  $^1H$  NMR (300 MHz,  $CDCl_3$ )  $\delta$  9.11 (s, 1H), 8.60 (d,  $J$  = 3.9 Hz, 1H), 8.48 (d,  $J$  = 5.0 Hz, 1H), 8.38 (s, 1H), 8.25 (d,  $J$  = 7.8 Hz, 1H), 7.75 (dd,  $J$  = 7.8, 5.5 Hz, 2H), 7.56 (s, 1H), 7.33 (dd,  $J$  = 14.9, 6.5 Hz, 3H), 7.14 (d,  $J$  = 8.2 Hz, 1H), 6.96 (t,  $J$  = 8.4 Hz, 2H), 2.08 (s, 3H) ppm;  $^{13}C$  NMR (75 MHz,  $CDCl_3$ )  $\delta$  166.4, 165.3, 164.6, 160.6, 151.8, 151.4, 148.5, 137.0, 134.9, 131.8, 131.4, 129.6, 129.5, 126.7, 123.8, 117.6, 115.8, 115.5, 114.2, 111.6, 15.9 ppm; HRMS (ESI) calcd for  $[C_{23}H_{17}N_4O_2F+H]^+$  401.1336, found 401.1414.

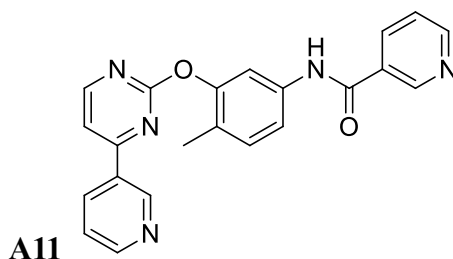

**N-(4-methyl-3-((4-(pyridin-3-yl)pyrimidin-2-yl)oxy)phenyl)nicotinamide:**

A round bottom flask was charged with 0.28 g of **8**, 0.13 g of nicotinic acid and 10 mL DCM. 0.15 g HOBt and 0.21 g of EDCI were added to the solution at room temperature. After stirring for 2 hours, 20 mL distilled water was added and the mixture was extracted with 20 mL DCM for two times. The organic layers were combined and washed with water and brine. The solvent was removed under reduced pressure and the residue was purified through flash chromatography on silica gel with DCM:MeOH = 30:1(v:v) as eluent. 0.34 g of **A11** was obtained in the yield of 89%. HPLC  $R_t$  = 7.6 min, purity: 99%;  $^1H$  NMR (300 MHz,  $CDCl_3$ )  $\delta$  9.19 (s, 1H), 8.76 (s, 1H), 8.69 (s, 1H), 8.59 (d,  $J$  = 5.1 Hz, 1H), 8.33 (d,  $J$  = 8.0 Hz, 1H), 7.68 – 7.65 (m, 3H), 7.47 – 7.40 (m, 3H), 7.26 (d,  $J$  = 8.4 Hz, 1H), 2.18 (s, 3H) ppm;  $^{13}C$  NMR (75 MHz,  $CDCl_3$ )  $\delta$  165.3, 164.7, 163.9, 160.6, 152.0, 151.4, 150.5, 148.6, 142.1, 136.5, 134.8, 131.7, 131.5, 127.4, 123.8, 121.0, 117.7, 114.4, 111.7, 16.0 ppm; HRMS (ESI)

calcd for [C<sub>22</sub>H<sub>17</sub>N<sub>5</sub>O<sub>2</sub>+H]<sup>+</sup> 384.1382, found 384.1463.

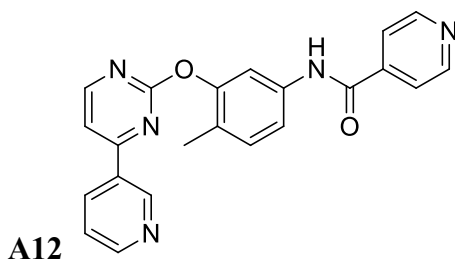

**N-(4-methyl-3-((4-(pyridin-3-yl)pyrimidin-2-yl)oxy)phenyl)isonicotinamide:** A round bottom flask was charged with 0.28 g of **8**, 0.13 g of isonicotinic acid and 10 mL DCM. 0.15 g HOBt and 0.21 g of EDCI were added to the solution at room temperature. After stirring for 2 hours, 20 mL distilled water was added and the mixture was extracted with 20 mL DCM for two times. The organic layers were combined and washed with water and brine. The solvent was removed under reduced pressure and the residue was purified through flash chromatography on silica gel with DCM:MeOH = 30:1(v:v) as eluent. 0.31 g of **A12** was obtained in the yield of 82%. HPLC R<sub>t</sub> = 8.3 min, purity: 99%; <sup>1</sup>H NMR (300 MHz, CDCl<sub>3</sub>) 9.20 (s, 1H), 9.08 (d, J = 1.4 Hz, 1H), 8.96 (s, 1H), 8.66 – 8.50 (m, 2H), 8.47 (d, J = 5.2 Hz, 1H), 8.27 – 8.16 (m, 1H), 8.07 (d, J = 8.0 Hz, 1H), 7.57 (d, J = 1.5 Hz, 1H), 7.41 – 7.26 (m, 3H), 7.22 (dd, J = 7.5, 4.6 Hz, 1H), 7.12 (d, J = 8.3 Hz, 1H), 2.06 (s, 3H) ppm; <sup>13</sup>C NMR (75 MHz, CDCl<sub>3</sub>) δ 165.2, 164.6, 164.1, 160.6, 152.0, 151.8, 151.3, 148.4, 148.0, 136.9, 135.6, 134.9, 131.7, 131.4, 130.9, 127.0, 123.9, 123.6, 117.9, 114.4, 111.7, 15.9 ppm; HRMS (ESI) calcd for [C<sub>22</sub>H<sub>17</sub>N<sub>5</sub>O<sub>2</sub>+H]<sup>+</sup> 384.1382, found 384.1459.

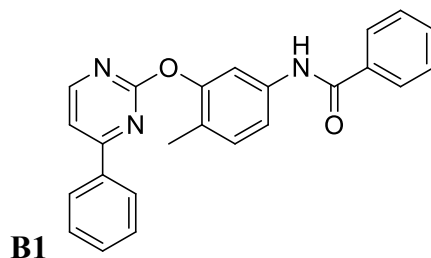

**N-(4-methyl-3-((4-phenylpyrimidin-2-yl)oxy)phenyl)benzamide:** A round bottom flask was charged with 0.28 g **8** (**4-methyl-3-((4-phenylpyrimidin-2-yl)oxy)aniline**), 0.13 g benzoic acid and 10 mL DCM. 0.15 g HOBt and 0.21 g of EDCI were added to the solution at room temperature. After stirring for 2 hours, 20 mL distilled water was added and the mixture was extracted with 20 mL DCM for two times. The organic layers were combined and washed with water and brine. The solvent was removed under reduced pressure and the residue was purified through flash chromatography on silica gel with DCM:MeOH = 150:1(v:v) as eluent. 0.33 g of **B1** was obtained in the yield of 86%. HPLC R<sub>t</sub> = 15.1 min, purity: 99%; <sup>1</sup>H NMR (300 MHz, CDCl<sub>3</sub>) 8.85 (s, 1H), 8.37 (d, J = 5.2 Hz, 1H), 7.96 (d, J = 6.3 Hz, 2H), 7.74 (d, J = 7.3 Hz, 2H), 7.61 (s, 1H), 7.51 (d, J = 6.9 Hz, 1H), 7.41 – 7.30 (m, 5H), 7.24 (t, J = 7.6 Hz, 2H), 7.13 (d, J = 8.3 Hz, 1H), 2.09 (s, 3H) ppm; <sup>13</sup>C NMR (75 MHz, CDCl<sub>3</sub>) δ 167.2, 166.3, 165.2, 159.8, 151.4, 137.4, 135.8, 134.8, 131.6, 131.4, 131.3, 128.9, 128.5, 127.4, 127.2, 126.5, 117.8, 114.3, 111.7, 16.0 ppm; HRMS (ESI) calcd for [C<sub>24</sub>H<sub>19</sub>N<sub>3</sub>O<sub>2</sub>+H]<sup>+</sup>

382.1477, found 382.1554.

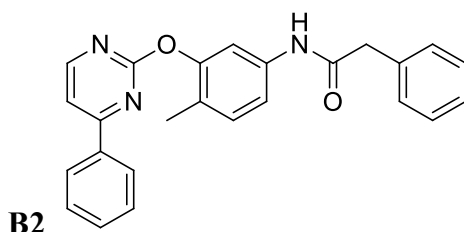

**N-(4-methyl-3-((4-phenylpyrimidin-2-yl)oxy)phenyl)-2-phenylacetamide:** A round bottom flask was charged with 0.28 g **8** (**4-methyl-3-((4-phenylpyrimidin-2-yl)oxy)aniline**), 0.15 g 2-phenylacetic acid and 10 mL DCM. 0.15 g HOBt and 0.21 g of EDCI were added to the solution at room temperature. After stirring for 2 hours, 20 mL distilled water was added and the mixture was extracted with 20 mL DCM for two times. The organic layers were combined and washed with water and brine. The solvent was removed under reduced pressure and the residue was purified through flash chromatography on silica gel with DCM:MeOH = 150:1(v:v) as eluent. 0.37 g of **B2** was obtained in the yield of 94%. HPLC  $R_t$  = 16.9 min, purity: 99%;  $^1\text{H NMR}$  (300 MHz,  $\text{CDCl}_3$ )  $\delta$  8.42 (d,  $J$  = 5.1 Hz, 1H), 7.97 (d,  $J$  = 6.5 Hz, 2H), 7.41 (d,  $J$  = 6.5 Hz, 4H), 7.34 (d,  $J$  = 5.1 Hz, 1H), 7.29 – 7.21 (m, 6H), 7.11 (d,  $J$  = 8.1 Hz, 1H), 3.61 (s, 2H), 2.09 (s, 3H) ppm;  $^{13}\text{C NMR}$  (75 MHz,  $\text{CDCl}_3$ )  $\delta$  169.0, 167.2, 165.3, 160.0, 151.500, 136.708, 136.0, 134.5, 131.4, 131.2, 129.5, 129.1, 128.9, 127.6, 127.4, 126.6, 117.0, 113.6, 111.6, 44.7, 16.0 ppm; HRMS (ESI) calcd for  $[\text{C}_{25}\text{H}_{21}\text{N}_3\text{O}_2+\text{H}]^+$  396.1634, found 396.1711.

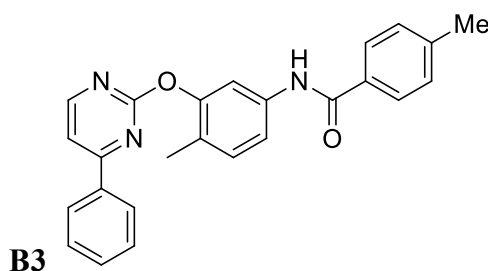

**4-methyl-N-(4-methyl-3-((4-phenylpyrimidin-2-yl)oxy)phenyl)benzamide:** A round bottom flask was charged with 0.28 g **8** (**4-methyl-3-((4-phenylpyrimidin-2-yl)oxy)aniline**), 0.13 g of 4-methylbenzoic acid and 10 mL DCM. 0.15 g HOBt and 0.21 g of EDCI were added to the solution at room temperature. After stirring for 2 hours, 20 mL distilled water was added and the mixture was extracted with 20 mL DCM for two times. The organic layers were combined and washed with water and brine. The solvent was removed under reduced pressure and the residue was purified through flash chromatography on silica gel with DCM:MeOH = 150:1(v:v) as eluent. 0.36 g of **B3** was obtained in the yield of 91%. HPLC  $R_t$  = 14.6 min, purity: 99%;  $^1\text{H NMR}$  (300 MHz,  $\text{CDCl}_3$ )  $\delta$  8.48 (d,  $J$  = 5.2 Hz, 1H), 8.22 (s, 1H), 8.03 – 8.00 (m, 2H), 7.62 – 7.56 (m, 3H), 7.51 – 7.38 (m, 5H), 7.27 – 7.20 (m, 3H), 2.33 (s, 3H), 2.15 (s, 3H) ppm;  $^{13}\text{C NMR}$  (75 MHz,  $\text{CDCl}_3$ )  $\delta$  167.2, 166.0, 165.3, 159.9, 151.5, 138.5, 137.2, 135.9, 134.9, 134.0, 132.5, 131.4, 131.3, 130.6, 128.9, 128.3, 127.4, 127.2, 126.6, 124.1, 117.5, 114.0, 111.6, 21.3, 16.0 ppm; HRMS (ESI) calcd for  $[\text{C}_{25}\text{H}_{21}\text{N}_3\text{O}_2+\text{H}]^+$  396.1634, found 396.1714.



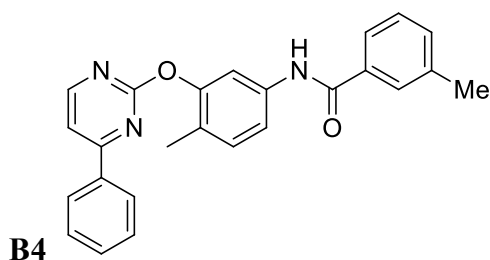

**3-methyl-N-(4-methyl-3-((4-phenylpyrimidin-2-yl)oxy)phenyl)benzamide:** A round bottom flask was charged with 0.28 g **8** (**4-methyl-3-((4-phenylpyrimidin-2-yl)oxy)aniline**), 0.13 g of 4-methylbenzoic acid and 10 mL DCM. 0.15 g HOBt and 0.21 g of EDCI were added to the solution at room temperature. After stirring for 2 hours, 20 mL distilled water was added and the mixture was extracted with 20 mL DCM for two times. The organic layers were combined and washed with water and brine. The solvent was removed under reduced pressure and the residue was purified through flash chromatography on silica gel with DCM:MeOH = 150:1(v:v) as eluent. 0.32 g of **B4** was obtained in the yield of 81%. HPLC  $R_t$  = 15.8 min, purity: 99%;  $^1\text{H}$  NMR (300 MHz,  $\text{CDCl}_3$ )  $\delta$  8.42 (d,  $J$  = 5.1 Hz, 1H), 7.97 – 7.94 (m, 3H), 7.64 (d,  $J$  = 8.1 Hz, 2H), 7.47 (d,  $J$  = 1.6 Hz, 1H), 7.41 (s, 1H), 7.40 – 7.32 (m, 5H), 7.18– 7.12 (m, 3H), 2.29 (s, 3H), 2.09 (s, 3H) ppm;  $^{13}\text{C}$  NMR (75 MHz,  $\text{CDCl}_3$ )  $\delta$  167.2, 165.3, 160.0, 142.3, 151.6, 142.3, 137.1, 136.0, 131.4, 128.9, 127.0, 117.4, 113.9, 111.6, 21.3, 16.0 ppm; HRMS (ESI) calcd for  $[\text{C}_{25}\text{H}_{21}\text{N}_3\text{O}_2+\text{H}]^+$  396.1634, found 396.1713.

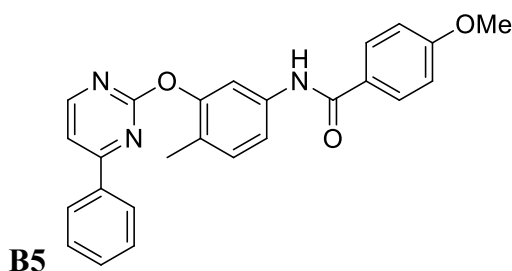

**4-methoxy-N-(4-methyl-3-((4-phenylpyrimidin-2-yl)oxy)phenyl)benzamide:** A round bottom flask was charged with 0.28 g **8** (**4-methyl-3-((4-phenylpyrimidin-2-yl)oxy)aniline**), 0.16 g of 4-methoxybenzoic acid and 10 mL DCM. 0.15 g HOBt and 0.21 g of EDCI were added to the solution at room temperature. After stirring for 2 hours, 20 mL distilled water was added and the mixture was extracted with 20 mL DCM for two times. The organic layers were combined and washed with water and brine. The solvent was removed under reduced pressure and the residue was purified through flash chromatography on silica gel with DCM:MeOH = 150:1(v:v) as eluent. 0.35 g of **B5** was obtained in the yield of 86%. HPLC  $R_t$  = 14.1 min, purity: 99%;  $^1\text{H}$  NMR (300 MHz,  $\text{CDCl}_3$ )  $\delta$  8.43 (d,  $J$  = 5.2 Hz, 1H), 8.37 (s, 1H), 8.00 (d,  $J$  = 7.7Hz, 2H), 7.76 (d,  $J$  = 8.7Hz, 2H), 7.55 (s, 1H), 7.49 – 7.34 (m, 5H), 7.17 (d,  $J$  = 8.2 Hz, 1H), 6.81 (d,  $J$  = 8.7 Hz, 3H), 3.75 (s, 3H), 2.13 (s, 3H) ppm;  $^{13}\text{C}$  NMR (75 MHz,  $\text{CDCl}_3$ )  $\delta$  167.1, 165.5, 165.3, 159.9, 151.5, 137.4, 135.9, 131.4, 131.3, 129.0, 128.9, 127.3, 127.0, 126.3, 117.6, 114.1, 113.8, 111.6, 55.4, 16.0 ppm; HRMS (ESI) calcd for  $[\text{C}_{25}\text{H}_{21}\text{N}_3\text{O}_3+\text{H}]^+$  412.1583, found

412.1662.

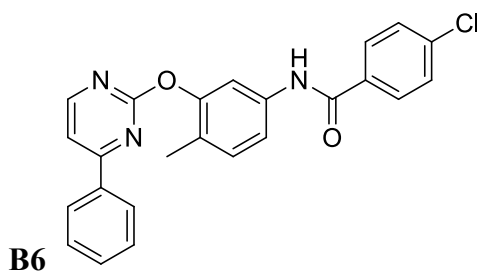

**4-chloro-N-(4-methyl-3-((4-phenylpyrimidin-2-yl)oxy)phenyl)benzamide:** A round bottom flask was charged with 0.28 g **8** (**4-methyl-3-((4-phenylpyrimidin-2-yl)oxy)aniline**), 0.16 g of 4-chlorobenzoic acid and 10 mL DCM. 0.15 g HOBt and 0.21 g of EDCI were added to the solution at room temperature. After stirring for 2 hours, 20 mL distilled water was added and the mixture was extracted with 20 mL DCM for two times. The organic layers were combined and washed with water and brine. The solvent was removed under reduced pressure and the residue was purified through flash chromatography on silica gel with DCM:MeOH = 150:1(v:v) as eluent. 0.37 g of **B6** was obtained in the yield of 89%. HPLC  $R_t$  = 11.7 min, purity: 97%;  $^1\text{H NMR}$  (300 MHz,  $\text{CDCl}_3$ )  $\delta$  8.53 (d,  $J$  = 5.2 Hz, 1H), 8.04 (dd,  $J$  = 7.3, 1.5 Hz, 2H), 7.88 (s, 1H), 7.77 (d,  $J$  = 8.5 Hz, 2H), 7.53 – 7.41 (m, 8H), 7.29 – 7.26 (m, 1H), 2.19 (s, 3H) ppm;  $^{13}\text{C NMR}$  (75 MHz,  $\text{CDCl}_3$ )  $\delta$  167.2, 165.2, 164.6, 159.9, 151.6, 138.0, 136.8, 135.9, 133.3, 131.4, 128.9, 128.5, 127.3, 127.0, 117.5, 114.1, 111.7, 16.0 ppm; HRMS (ESI) calcd for  $[\text{C}_{24}\text{H}_{18}\text{N}_3\text{O}_2\text{Cl}+\text{H}]^+$  416.1088, found 416.1665.

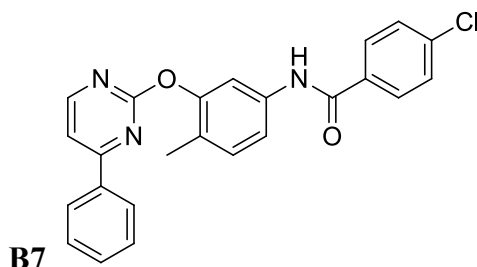

**3-chloro-N-(4-methyl-3-((4-phenylpyrimidin-2-yl)oxy)phenyl)benzamide:** A round bottom flask was charged with 0.28 g **8** (**4-methyl-3-((4-phenylpyrimidin-2-yl)oxy)aniline**), 0.16 g of 3-chlorobenzoic acid and 10 mL DCM. 0.15 g HOBt and 0.21 g of EDCI were added to the solution at room temperature. After stirring for 2 hours, 20 mL distilled water was added and the mixture was extracted with 20 mL DCM for two times. The organic layers were combined and washed with water and brine. The solvent was removed under reduced pressure and the residue was purified through flash chromatography on silica gel with DCM:MeOH = 150:1(v:v) as eluent. 0.35 g of **B7** was obtained in the yield of 84%. HPLC  $R_t$  = 13.6 min, purity: 99%;  $^1\text{H NMR}$  (300 MHz,  $\text{CDCl}_3$ )  $\delta$  8.91 (s, 1H), 8.39 (d,  $J$  = 5.2 Hz, 1H), 7.96 (d,  $J$  = 6.6 Hz, 2H), 7.71 (s, 1H), 7.61 – 7.48 (m, 3H), 7.43 – 7.34 (m, 5H), 7.18 (d,  $J$  = 8.0 Hz, 1H), 7.13 (d,  $J$  = 8.0 Hz, 1H), 2.08 (s, 3H) ppm;  $^{13}\text{C NMR}$  (75 MHz,  $\text{CDCl}_3$ )  $\delta$  167.2, 165.1, 164.9, 159.8, 151.4, 137.0, 136.6, 135.8, 134.5, 131.5, 131.3, 129.8, 127.5, 127.3, 126.8, 125.4, 117.9, 114.4, 111.8, 16.0 ppm;

HRMS (ESI) calcd for  $[C_{24}H_{18}N_3O_2Cl+H]^+$  416.1088, found 416.1165.

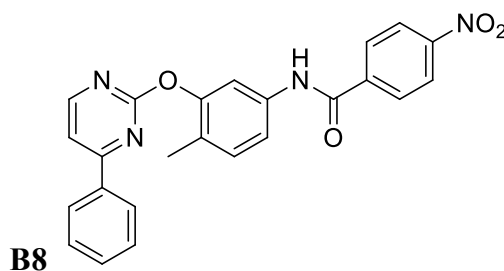

**N-(4-methyl-3-((4-phenylpyrimidin-2-yl)oxy)phenyl)-4-nitrobenzamide:** A round bottom flask was charged with 0.28 g **8** (**4-methyl-3-((4-phenylpyrimidin-2-yl)oxy)aniline**), 0.16 g of 4-nitrobenzoic acid and 10 mL DCM. 0.15 g HOBt and 0.21 g of EDCI were added to the solution at room temperature. After stirring for 2 hours, 20 mL distilled water was added and the mixture was extracted with 20 mL DCM for two times. The organic layers were combined and washed with water and brine. The solvent was removed under reduced pressure and the residue was purified through flash chromatography on silica gel with DCM:MeOH = 100:1(v:v) as eluent. 0.33 g of **B8** was obtained in the yield of 77%. HPLC  $R_t$  = 11.8 min, purity: 99%;  $^1H$  NMR (300 MHz,  $CDCl_3$ )  $\delta$  8.55 (d,  $J$  = 5.1 Hz, 1H), 8.33 (d,  $J$  = 8.7 Hz, 2H), 8.14 – 7.93 (m, 4H), 7.84 (s, 1H), 7.56 (s, 1H), 7.50 – 7.44 (m, 4H), 7.32 (d,  $J$  = 8.2 Hz, 1H), 2.22 (s, 3H) ppm;  $^{13}C$  NMR (75 MHz,  $CDCl_3$ )  $\delta$  167.3, 165.1, 163.9, 159.9, 151.5, 149.5, 140.4, 136.4, 135.7, 131.5, 129.0, 128.4, 127.3, 123.8, 117.8, 114.3, 111.8, 16.0 ppm; HRMS (ESI) calcd for  $[C_{24}H_{18}N_4O_4+H]^+$  427.1328, found 427.1403.

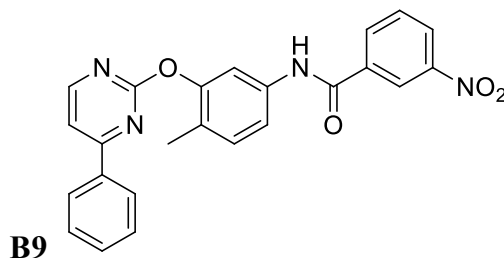

**N-(4-methyl-3-((4-phenylpyrimidin-2-yl)oxy)phenyl)-3-nitrobenzamide:** A round bottom flask was charged with 0.28 g **8** (**4-methyl-3-((4-phenylpyrimidin-2-yl)oxy)aniline**), 0.16 g of 3-nitrobenzoic acid and 10 mL DCM. 0.15 g HOBt and 0.21 g of EDCI were added to the solution at room temperature. After stirring for 2 hours, 20 mL distilled water was added and the mixture was extracted with 20 mL DCM for two times. The organic layers were combined and washed with water and brine. The solvent was removed under reduced pressure and the residue was purified through flash chromatography on silica gel with DCM:MeOH = 100:1(v:v) as eluent. 0.31 g of **B9** was obtained in the yield of 73%. HPLC  $R_t$  = 12.6 min, purity: 99%;  $^1H$  NMR (300 MHz,  $CDCl_3$ )  $\delta$  8.65 (t,  $J$  = 1.7 Hz, 1H), 8.58 (s, 1H), 8.49 (d,  $J$  = 5.2 Hz, 1H), 8.35 – 8.24 (m, 1H), 8.19 (d,  $J$  = 7.9 Hz, 1H), 7.99 (dd,  $J$  = 7.9, 1.6 Hz, 2H), 7.59 (t,  $J$  = 8.0 Hz, 1H), 7.55 – 7.49 (m, 2H), 7.45 – 7.35 (m, 4H), 7.24 (dd,  $J$  = 9.7, 5.3 Hz, 1H), 2.14 (s, 3H). ppm;  $^{13}C$  NMR (75 MHz,  $CDCl_3$ )  $\delta$  167.3, 165.1, 163.5, 159.8, 151.4, 148.0, 136.5, 135.7, 133.5, 131.5, 129.9,

128.9, 127.3, 126.2, 122.0, 117.8, 114.4, 111.8, 16.0 ppm; HRMS (ESI) calcd for  $[C_{24}H_{18}N_4O_4+H]^+$  427.1328, found 427.1407.

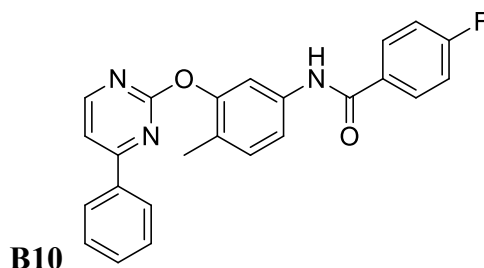

**4-fluoro-N-(4-methyl-3-((4-phenylpyrimidin-2-yl)oxy)phenyl)benzamide:** A round bottom flask was charged with 0.28 g **8** (**4-methyl-3-((4-phenylpyrimidin-2-yl)oxy)aniline**), 0.15 g of 4-fluorobenzoic acid and 10 mL DCM. 0.15 g HOBt and 0.21 g of EDCI were added to the solution at room temperature. After stirring for 2 hours, 20 mL distilled water was added and the mixture was extracted with 20 mL DCM for two times. The organic layers were combined and washed with water and brine. The solvent was removed under reduced pressure and the residue was purified through flash chromatography on silica gel with DCM:MeOH = 100:1(v:v) as eluent. 0.32 g of **B10** was obtained in the yield of 80%. HPLC  $R_t$  = 10.6 min, purity: 99%;  $^1H$  NMR (300 MHz,  $CDCl_3$ )  $\delta$  8.52 (d,  $J$  = 5.2 Hz, 1H), 8.04 (dd,  $J$  = 7.5, 1.7 Hz, 2H), 7.91 (s, 1H), 7.84 (dd,  $J$  = 8.7, 5.3 Hz, 2H), 7.58 – 7.37 (m, 6H), 7.27 (d,  $J$  = 6.3 Hz, 1H), 7.12 (t,  $J$  = 8.6 Hz, 2H), 2.19 (s, 3H) ppm;  $^{13}C$  NMR (75 MHz,  $CDCl_3$ )  $\delta$  167.2, 166.5, 160.0, 151.6, 136.8, 136.0, 131.4, 129.4, 129.3, 128.9, 127.3, 127.0, 117.4, 115.9, 115.6, 114.1, 111.6, 16.0 ppm; HRMS (ESI) calcd for  $[C_{24}H_{18}N_3O_2F+H]^+$  400.1383, found 400.1463.

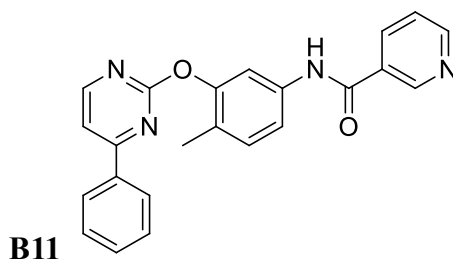

**N-(4-methyl-3-((4-phenylpyrimidin-2-yl)oxy)phenyl)nicotinamide:** A round bottom flask was charged with 0.28 g **8** (**4-methyl-3-((4-phenylpyrimidin-2-yl)oxy)aniline**), 0.13 g of nicotinic acid and 10 mL DCM. 0.15 g HOBt and 0.21 g of EDCI were added to the solution at room temperature. After stirring for 2 hours, 20 mL distilled water was added and the mixture was extracted with 20 mL DCM for two times. The organic layers were combined and washed with water and brine. The solvent was removed under reduced pressure and the residue was purified through flash chromatography on silica gel with DCM:MeOH = 50:1(v:v) as eluent. 0.34 g of **B11** was obtained in the yield of 89%. HPLC  $R_t$  = 10.9 min, purity: 99%;  $^1H$  NMR (300 MHz,  $CDCl_3$ )  $\delta$  9.38 (s, 1H), 8.55 (d,  $J$  = 4.3 Hz, 2H), 8.43 (d,  $J$  = 5.1 Hz, 1H), 7.98 (d,  $J$  = 6.9 Hz, 2H), 7.61 – 7.50 (m, 4H), 7.46 – 7.36 (m, 4H), 7.19 (d,  $J$  = 8.2 Hz, 1H), 2.13 (s, 3H) ppm;  $^{13}C$  NMR (75 MHz,  $CDCl_3$ )  $\delta$  167.2, 165.1, 164.2, 159.9, 151.5, 150.2, 142.2, 136.7, 135.7, 131.5,

131.4, 128.9, 127.3, 121.3, 117.9, 114.4, 111.8, 16.0 ppm; HRMS (ESI) calcd for  $[C_{23}H_{18}N_4O_2+H]^+$  383.1430, found 383.1506.

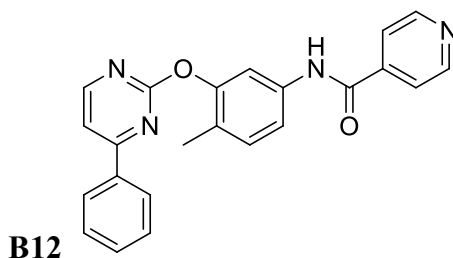

**N-(4-methyl-3-((4-phenylpyrimidin-2-yl)oxy)phenyl)isonicotinamide:** A round bottom flask was charged with 0.28 g **8** (**4-methyl-3-((4-phenylpyrimidin-2-yl)oxy)aniline**), 0.13 g of isonicotinic acid and 10 mL DCM. 0.15 g HOBt and 0.21 g of EDCI were added to the solution at room temperature. After stirring for 2 hours, 20 mL distilled water was added and the mixture was extracted with 20 mL DCM for two times. The organic layers were combined and washed with water and brine. The solvent was removed under reduced pressure and the residue was purified through flash chromatography on silica gel with DCM:MeOH = 50:1(v:v) as eluent. 0.34 g of **B12** was obtained in the yield of 89%. HPLC  $R_t$  = 11.7 min, purity: 99%;  $^1H$  NMR (300 MHz,  $CDCl_3$ )  $\delta$  9.00 (d,  $J$  = 1.5 Hz, 1H), 8.91 (s, 1H), 8.63 (dd,  $J$  = 4.7, 1.3 Hz, 1H), 8.45 (d,  $J$  = 5.2 Hz, 1H), 8.12 (d,  $J$  = 8.0 Hz, 2H), 7.61 – 7.50 (m, 4H), 7.51 (s, 2H), 7.48 – 7.38 (m, 4H), 7.30 – 7.28 (m, 1H), 7.21 (d,  $J$  = 8.8 Hz, 1H), 2.14 (s, 3H) ppm;  $^{13}C$  NMR (75 MHz,  $CDCl_3$ )  $\delta$  167.2, 165.1, 164.0, 159.8, 152.2, 151.5, 148.0, 136.8, 135.8, 135.5, 131.4, 130.8, 128.9, 127.3, 123.6, 117.8, 114.3, 111.8, 16.0 ppm; HRMS (ESI) calcd for  $[C_{23}H_{18}N_4O_2+H]^+$  383.1430, found 383.1507.

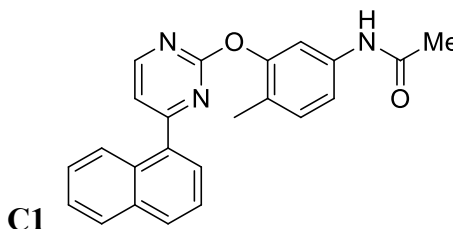

**N-(4-methyl-3-((4-(naphthalen-1-yl)pyrimidin-2-yl)oxy)phenyl)acetamide:** A round bottom flask was charged with 0.32 g **8** (**4-methyl-3-((4-(naphthalen-1-yl)pyrimidin-2-yl)oxy)aniline**), 0.07 g of acetic acid and 10 mL DCM. 0.15 g HOBt and 0.21 g of EDCI were added to the solution at room temperature. After stirring for 2 hours, 20 mL distilled water was added and the mixture was extracted with 20 mL DCM for two times. The organic layers were combined and washed with water and brine. The solvent was removed under reduced pressure and the residue was purified through flash chromatography on silica gel with DCM:MeOH = 200:1(v:v) as eluent. 0.37 g of **C1** was obtained in the yield of 96%. HPLC  $R_t$  = 20.7 min, purity: 99%;  $^1H$  NMR (300 MHz,  $CDCl_3$ )  $\delta$  8.49 (d,  $J$  = 5.1 Hz, 1H), 8.22 – 8.08 (m, 1H), 7.90 – 7.71 (m, 3H), 7.60 (d,  $J$  = 6.6 Hz, 1H), 7.50 – 7.34 (m, 4H), 7.23 (d,  $J$  = 5.1 Hz, 1H), 7.13 – 7.05 (m, 2H), 2.10 (s, 3H), 1.92 (s, 3H) ppm;  $^{13}C$  NMR (75 MHz,  $CDCl_3$ )  $\delta$  169.8, 168.4, 165.1, 159.4, 151.4, 137.3, 135.0, 133.9,

131.3, 130.8, 130.4, 128.6, 128.3, 127.1, 126.3, 126.0, 125.2, 125.0, 117.0, 116.8, 113.6, 24.4, 16.0 ppm; HRMS (ESI) calcd for  $[C_{23}H_{19}N_3O_2+H]^+$  370.1477, found 370.1556.

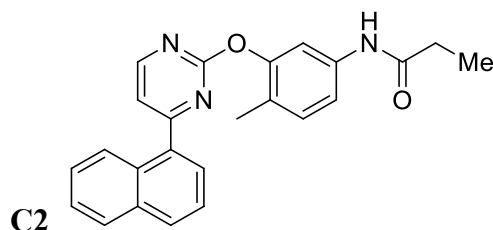

**N-(4-methyl-3-((4-(naphthalen-1-yl)pyrimidin-2-yl)oxy)phenyl)propionamide:** A round bottom flask was charged with 0.32 g **8** (4-methyl-3-((4-(naphthalen-1-yl)pyrimidin-2-yl)oxy)aniline), 0.08 g of acetic acid and 10 mL DCM. 0.15 g HOBt and 0.21 g of EDCI were added to the solution at room temperature. After stirring for 2 hours, 20 mL distilled water was added and the mixture was extracted with 20 mL DCM for two times. The organic layers were combined and washed with water and brine. The solvent was removed under reduced pressure and the residue was purified through flash chromatography on silica gel with DCM:MeOH = 200:1(v:v) as eluent. 0.36 g of **C2** was obtained in the yield of 94%. HPLC  $R_t$  = 19.1 min, purity: 99%;  $^1H$  NMR (300 MHz,  $CDCl_3$ )  $\delta$  8.48 (d,  $J$  = 5.0 Hz, 1H), 8.23 – 8.10 (m, 1H), 7.91 – 7.69 (m, 3H), 7.59 (d,  $J$  = 7.0 Hz, 1H), 7.52 – 7.33 (m, 4H), 7.20 (t,  $J$  = 7.1 Hz, 1H), 7.12 (d,  $J$  = 7.9 Hz, 1H), 7.05 (d,  $J$  = 8.1 Hz, 1H), 2.21 – 2.12 (m, 2H), 2.10 (s, 3H), 1.04 (t,  $J$  = 7.5 Hz, 3H) ppm;  $^{13}C$  NMR (75 MHz,  $CDCl_3$ )  $\delta$  172.2, 169.8, 165.1, 159.4, 151.4, 137.4, 135.0, 133.9, 131.2, 130.8, 130.4, 128.6, 128.3, 127.1, 126.3, 125.8, 125.2, 125.1, 116.9, 116.8, 113.6, 30.4, 16.0, 9.6 ppm; HRMS (ESI) calcd for  $[C_{24}H_{21}N_3O_2+H]^+$  384.1634, found 384.1712.

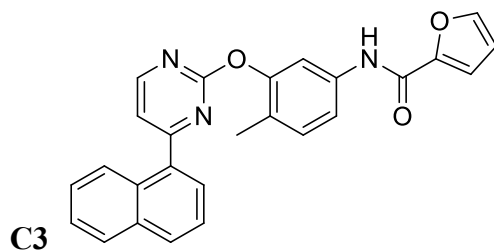

**N-(4-methyl-3-((4-(naphthalen-1-yl)pyrimidin-2-yl)oxy)phenyl)furan-2-carboxamide:** A round bottom flask was charged with 0.32 g **8** (4-methyl-3-((4-(naphthalen-1-yl)pyrimidin-2-yl)oxy)aniline), 0.12 g of furan-2-carboxylic acid and 10 mL DCM. 0.15 g HOBt and 0.21 g of EDCI were added to the solution at room temperature. After stirring for 2 hours, 20 mL distilled water was added and the mixture was extracted with 20 mL DCM for two times. The organic layers were combined and washed with water and brine. The solvent was removed under reduced pressure and the residue was purified through flash chromatography on silica gel with DCM:MeOH = 200:1(v:v) as eluent. 0.35 g of **C3** was obtained in the yield of 83%. HPLC  $R_t$  = 18.3 min, purity: 99%;  $^1H$  NMR (300 MHz,  $CDCl_3$ )  $\delta$  8.62 (d,  $J$  = 5.1 Hz, 1H), 8.32 – 8.22 (m, 1H), 8.13 (s, 1H), 7.94 (d,  $J$  = 8.2 Hz, 1H), 7.89 (dd,  $J$  = 6.4, 3.0 Hz, 1H), 7.77 – 7.67 (m, 2H), 7.60 – 7.43 (m,

4H), 7.42 – 7.29 (m, 2H), 7.23 (dd,  $J = 11.5, 5.5$  Hz, 2H), 6.52 (dd,  $J = 3.4, 1.7$  Hz, 1H), 2.24 (s, 3H) ppm;  $^{13}\text{C}$  NMR (75 MHz,  $\text{CDCl}_3$ )  $\delta$  169.7, 165.1, 159.6, 155.9, 151.7, 147.8, 144.2, 136.4, 135.0, 133.9, 131.4, 130.7, 130.4, 128.5, 128.3, 127.1, 126.7, 126.2, 125.2, 125.1, 117.0, 116.8, 115.3, 113.8, 112.6, 16.0 ppm; HRMS (ESI) calcd for  $[\text{C}_{26}\text{H}_{19}\text{N}_3\text{O}_3+\text{H}]^+$  422.1426, found 422.1504.

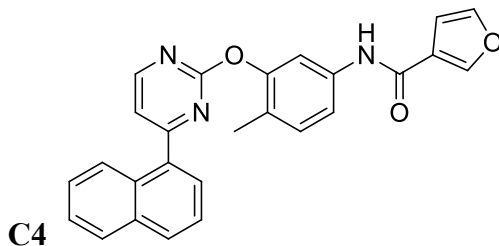

**N-(4-methyl-3-((4-(naphthalen-1-yl)pyrimidin-2-yl)oxy)phenyl)furan-3-carboxamide:** A round bottom flask was charged with 0.32 g **8**

**(4-methyl-3-((4-(naphthalen-1-yl)pyrimidin-2-yl)oxy)aniline)**, 0.12 g of furan-3-carboxylic acid and 10 mL DCM. 0.15 g HOBt and 0.21 g of EDCI were added to the solution at room temperature. After stirring for 2 hours, 20 mL distilled water was added and the mixture was extracted with 20 mL DCM for two times. The organic layers were combined and washed with water and brine. The solvent was removed under reduced pressure and the residue was purified through flash chromatography on silica gel with DCM:MeOH = 200:1(v:v) as eluent. 0.38 g of **C4** was obtained in the yield of 90%. HPLC  $R_t = 20.3$  min, purity: 99%;  $^1\text{H}$  NMR (300 MHz,  $\text{CDCl}_3$ )  $\delta$  8.58 (d,  $J = 5.1$  Hz, 1H), 8.29 – 8.18 (m, 1H), 7.97 (s, 1H), 7.93 (d,  $J = 8.2$  Hz, 1H), 7.88 (dd,  $J = 6.1, 3.2$  Hz, 1H), 7.78 (s, 1H), 7.69 (d,  $J = 7.1$  Hz, 1H), 7.61 (s, 1H), 7.56 – 7.43 (m, 3H), 7.40 (s, 1H), 7.33 (dd,  $J = 11.0, 3.4$  Hz, 2H), 7.27 – 7.16 (m, 1H), 6.68 (s, 1H), 2.21 (s, 3H) ppm;  $^{13}\text{C}$  NMR (75 MHz,  $\text{CDCl}_3$ )  $\delta$  169.8, 165.1, 160.7, 159.5, 151.6, 145.1, 143.9, 136.7, 135.0, 133.9, 131.4, 130.8, 130.4, 128.6, 128.3, 127.1, 126.7, 126.25, 125.2, 125.1, 123.0, 117.4, 116.8, 114.1, 108.4, 16.0 ppm; HRMS (ESI) calcd for  $[\text{C}_{26}\text{H}_{19}\text{N}_3\text{O}_3+\text{H}]^+$  422.1426, found 422.1506.

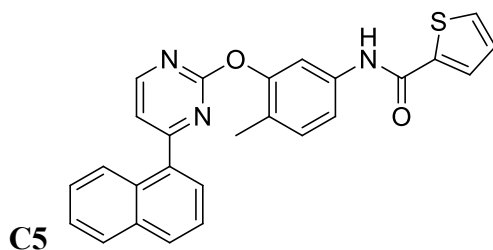

**N-(4-methyl-3-((4-(naphthalen-1-yl)pyrimidin-2-yl)oxy)phenyl)thiophene-2-carboxamide:** A round bottom flask was charged with 0.32 g **8**

**(4-methyl-3-((4-(naphthalen-1-yl)pyrimidin-2-yl)oxy)aniline)**, 0.14 g of thiophene-2-carboxylic acid and 10 mL DCM. 0.15 g HOBt and 0.21 g of EDCI were added to the solution at room temperature. After stirring for 2 hours, 20 mL distilled water was added and the mixture was extracted with 20 mL DCM for two times. The organic layers were combined and washed with water and brine. The solvent was removed under reduced pressure and the residue was purified through flash

chromatography on silica gel with DCM:MeOH = 200:1(v:v) as eluent. 0.38 g of **C5** was obtained in the yield of 90%. HPLC  $R_t = 19.7$  min, purity: 98%;  $^1\text{H NMR}$  (300 MHz,  $\text{CDCl}_3$ )  $\delta$  8.61 (d,  $J = 5.1$  Hz, 1H), 8.32 – 8.23 (m, 1H), 7.99 – 7.85 (m, 3H), 7.78 – 7.64 (m, 3H), 7.59 – 7.42 (m, 4H), 7.35 (dd,  $J = 7.3, 3.9$  Hz, 3H), 7.25 (d,  $J = 7.8$  Hz, 1H), 2.24 (s, 3H) ppm;  $^{13}\text{C NMR}$  (75 MHz,  $\text{CDCl}_3$ )  $\delta$  169.7, 159.5, 136.8, 135.1, 133.9, 131.4, 130.7, 130.4, 128.6, 128.5, 128.3, 127.1, 126.9, 126.2, 126.1, 125.2, 125.1, 117.2, 116.8, 114.0, 16.0 ppm; HRMS (ESI) calcd for  $[\text{C}_{26}\text{H}_{19}\text{N}_3\text{O}_2\text{S}+\text{H}]^+$  438.1198, found 438.1276.

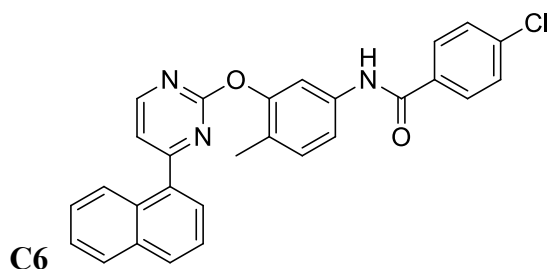

**4-chloro-N-(4-methyl-3-((4-(naphthalen-1-yl)pyrimidin-2-yl)oxy)phenyl)benzamide:**

A round bottom flask was charged with 0.32 g **8** (4-methyl-3-((4-(naphthalen-1-yl)pyrimidin-2-yl)oxy)aniline), 0.14 g of 4-chlorobenzoic acid and 10 mL DCM. 0.15 g HOBt and 0.21 g of EDCI were added to the solution at room temperature. After stirring for 2 hours, 20 mL distilled water was added and the mixture was extracted with 20 mL DCM for two times. The organic layers were combined and washed with water and brine. The solvent was removed under reduced pressure and the residue was purified through flash chromatography on silica gel with DCM:MeOH = 200:1(v:v) as eluent. 0.40 g of **C6** was obtained in the yield of 86%. HPLC  $R_t = 9.7$  min, purity: 99%;  $^1\text{H NMR}$  (300 MHz,  $\text{CDCl}_3$ )  $\delta$  8.57 – 8.44 (m, 2H), 8.21 – 8.12 (m, 1H), 7.90 – 7.76 (m, 2H), 7.67 – 7.55 (m, 4H), 7.43 (dd,  $J = 9.0, 5.6$  Hz, 3H), 7.39 – 7.31 (m, 1H), 7.27 – 7.10 (m, 4H), 2.18 (s, 3H) ppm;  $^{13}\text{C NMR}$  (75 MHz,  $\text{CDCl}_3$ )  $\delta$  169.7, 165.1, 164.9, 159.5, 151.5, 137.8, 137.0, 134.8, 133.8, 133.1, 131.4, 130.8, 130.3, 128.7, 128.6, 128.2, 127.1, 126.7, 126.2, 125.1, 125.0, 117.7, 116.9, 114.3, 16.0 ppm; HRMS (ESI) calcd for  $[\text{C}_{28}\text{H}_{20}\text{N}_3\text{O}_2\text{Cl}+\text{H}]^+$  466.1244, found 466.1313.

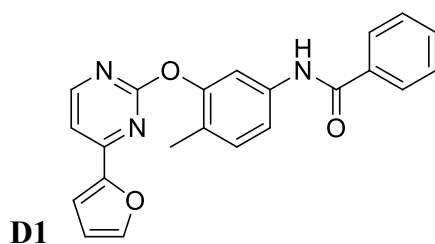

**N-(3-((4-(furan-2-yl)pyrimidin-2-yl)oxy)-4-methylphenyl)benzamide:** A round bottom flask was charged with 0.26 g **8**

**3-((4-(furan-2-yl)pyrimidin-2-yl)oxy)-4-methylaniline**, 0.13 g of benzoic acid and 10 mL DCM. 0.15 g HOBt and 0.21 g of EDCI were added to the solution at room temperature. After stirring for 2 hours, 20 mL distilled water was added and the mixture was extracted with 20 mL DCM for two times. The organic layers were combined and washed with water and brine. The solvent was removed under reduced



pressure and the residue was purified through flash chromatography on silica gel with DCM:MeOH = 100:1(v:v) as eluent. 0.31 g of **D1** was obtained in the yield of 83%. HPLC  $R_t$  = 15.7 min, purity: 99%;  $^1\text{H}$  NMR (300 MHz,  $\text{CDCl}_3$ )  $\delta$  8.46 (d,  $J$  = 5.2 Hz, 1H), 7.99 (s, 1H), 7.82 (d,  $J$  = 7.5 Hz, 2H), 7.60 (s, 1H), 7.56 – 7.37 (m, 5H), 7.31 (t,  $J$  = 4.6 Hz, 2H), 7.25 (d,  $J$  = 8.8 Hz, 1H), 6.63 – 6.49 (m, 1H), 2.17 (s, 3H) ppm;  $^{13}\text{C}$  NMR (75 MHz,  $\text{CDCl}_3$ )  $\delta$  166.1, 164.9, 159.7, 158.1, 151.3, 151.1, 145.5, 137.2, 134.8, 131.6, 131.2, 128.4, 127.8, 126.5, 117.7, 114.2, 113.5, 112.7, 109.7, 15.9 ppm; HRMS (ESI) calcd for  $[\text{C}_{22}\text{H}_{17}\text{N}_3\text{O}_3+\text{H}]^+$  372.1270, found 372.1344.

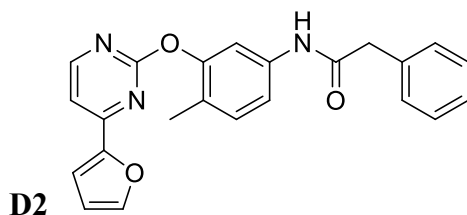

**N-(3-((4-(furan-2-yl)pyrimidin-2-yl)oxy)-4-methylphenyl)-2-phenylacetamide:** A round bottom flask was charged with 0.26 g **8**

**3-((4-(furan-2-yl)pyrimidin-2-yl)oxy)-4-methylaniline**, 0.14 g of 2-phenylacetic acid and 10 mL DCM. 0.15 g HOBt and 0.21 g of EDCI were added to the solution at room temperature. After stirring for 2 hours, 20 mL distilled water was added and the mixture was extracted with 20 mL DCM for two times. The organic layers were combined and washed with water and brine. The solvent was removed under reduced pressure and the residue was purified through flash chromatography on silica gel with DCM:MeOH = 100:1(v:v) as eluent. 0.36 g of **D2** was obtained in the yield of 93%. HPLC  $R_t$  = 16.5 min, purity: 99%;  $^1\text{H}$  NMR (300 MHz,  $\text{CDCl}_3$ )  $\delta$  8.40 (d,  $J$  = 5.2 Hz, 1H), 7.63 (s, 1H), 7.58 (dd,  $J$  = 1.5, 0.6 Hz, 1H), 7.39 – 7.19 (m, 10H), 7.14 (d,  $J$  = 8.2 Hz, 1H), 6.54 (dd,  $J$  = 3.5, 1.7 Hz, 1H), 3.64 (s, 2H), 2.12 (s, 3H) ppm;  $^{13}\text{C}$  NMR (75 MHz,  $\text{CDCl}_3$ )  $\delta$  169.2, 164.9, 159.8, 158.2, 151.3, 151.2, 145.5, 137.9, 136.8, 134.5, 131.2, 129.5, 129.4, 129.1, 128.6, 127.5, 127.1, 126.6, 117.2, 113.6, 113.6, 112.7, 109.7, 44.6, 15.9 ppm; HRMS (ESI) calcd for  $[\text{C}_{23}\text{H}_{19}\text{N}_3\text{O}_3+\text{H}]^+$  386.1426, found 386.1501.

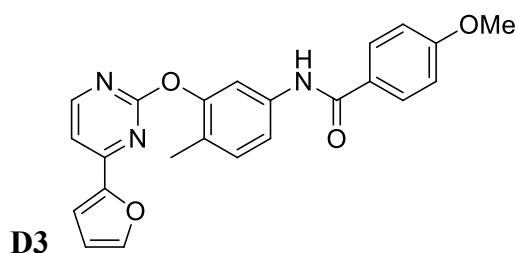

**N-(3-((4-(furan-2-yl)pyrimidin-2-yl)oxy)-4-methylphenyl)-4-methoxybenzamide:** A round bottom flask was charged with 0.26 g **8**

**3-((4-(furan-2-yl)pyrimidin-2-yl)oxy)-4-methylaniline**, 0.16 g of 4-methoxybenzoic acid and 10 mL DCM. 0.15 g HOBt and 0.21 g of EDCI were added to the solution at room temperature. After stirring for 2 hours, 20 mL distilled water was added and the mixture was extracted with 20 mL DCM for two times. The organic layers were combined and washed with water and brine. The solvent was removed under reduced

pressure and the residue was purified through flash chromatography on silica gel with DCM:MeOH = 100:1(v:v) as eluent. 0.37 g of **D3** was obtained in the yield of 92%. HPLC  $R_t$  = 16.9 min, purity: 99%;  $^1\text{H}$  NMR (300 MHz,  $\text{CDCl}_3$ )  $\delta$  8.43 (d,  $J$  = 5.2 Hz, 1H), 8.12 – 7.98 (m, 1H), 7.87 – 7.70 (m, 2H), 7.58 (dd,  $J$  = 1.6, 0.6 Hz, 1H), 7.50 (d,  $J$  = 2.1 Hz, 1H), 7.46 (dd,  $J$  = 8.1, 2.2 Hz, 1H), 7.32 – 7.25 (m, 2H), 7.21 (d,  $J$  = 8.2 Hz, 1H), 6.92 – 6.85 (m, 2H), 6.55 (dd,  $J$  = 3.5, 1.8 Hz, 1H), 3.82 (s, 3H), 2.15 (s, 3H) ppm;  $^{13}\text{C}$  NMR (75 MHz,  $\text{CDCl}_3$ )  $\delta$  165.2, 165.0, 162.4, 159.9, 158.2, 151.43, 151.2, 145.4, 137.2, 131.3, 128.9, 127.1, 126.4, 117.5, 113.9, 113.8, 113.5, 112.7, 109.7, 29.7, 16.0 ppm; HRMS (ESI) calcd for  $[\text{C}_{23}\text{H}_{19}\text{N}_3\text{O}_4+\text{H}]^+$  402.1376, found 402.1451.

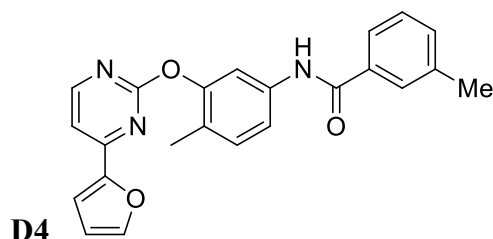

**N-(3-((4-(furan-2-yl)pyrimidin-2-yl)oxy)-4-methylphenyl)-3-methylbenzamide:** A round bottom flask was charged with 0.26 g **8**

**3-((4-(furan-2-yl)pyrimidin-2-yl)oxy)-4-methylaniline**, 0.14 g of 3-methylbenzoic acid and 10 mL DCM. 0.15 g HOBt and 0.21 g of EDCI were added to the solution at room temperature. After stirring for 2 hours, 20 mL distilled water was added and the mixture was extracted with 20 mL DCM for two times. The organic layers were combined and washed with water and brine. The solvent was removed under reduced pressure and the residue was purified through flash chromatography on silica gel with DCM:MeOH = 100:1(v:v) as eluent. 0.36 g of **D4** was obtained in the yield of 93%. HPLC  $R_t$  = 15.2 min, purity: 96%;  $^1\text{H}$  NMR (300 MHz,  $\text{CDCl}_3$ )  $\delta$  8.57 (s, 1H), 8.37 (d,  $J$  = 5.2 Hz, 1H), 7.62 – 7.44 (m, 5H), 7.32 – 7.08 (m, 5H), 6.49 (dd,  $J$  = 3.5, 1.7 Hz, 1H), 2.25 (s, 3H), 2.08 (s, 3H) ppm;  $^{13}\text{C}$  NMR (75 MHz,  $\text{CDCl}_3$ )  $\delta$  166.3, 164.9, 159.8, 158.2, 151.3, 151.1, 145.5, 138.3, 138.1, 137.3, 134.8, 133.9, 132.4, 131.3, 130.5, 128.4, 128.2, 127.9, 127.2, 126.4, 124.2, 117.7, 114.2, 113.6, 112.7, 109.7, 21.3, 15.9 ppm; HRMS (ESI) calcd for  $[\text{C}_{23}\text{H}_{19}\text{N}_3\text{O}_3+\text{H}]^+$  386.1426, found 386.1499.

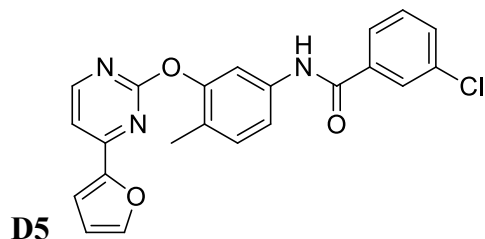

**3-chloro-N-(3-((4-(furan-2-yl)pyrimidin-2-yl)oxy)-4-methylphenyl)benzamide:** A round bottom flask was charged with 0.26 g **8**

**3-((4-(furan-2-yl)pyrimidin-2-yl)oxy)-4-methylaniline**, 0.14 g of 3-chlorobenzoic acid and 10 mL DCM. 0.15 g HOBt and 0.21 g of EDCI were added to the solution at room temperature. After stirring for 2 hours, 20 mL distilled water was added and the mixture was extracted with 20 mL DCM for two times. The organic layers were combined and washed with water and brine. The solvent was removed under reduced pressure and the residue was purified through flash chromatography on silica gel with

DCM:MeOH = 100:1(v:v) as eluent. 0.38 g of **D5** was obtained in the yield of 94%. HPLC  $R_t$  = 14.7 min, purity: 99%;  $^1\text{H NMR}$  (300 MHz,  $\text{CDCl}_3$ )  $\delta$  8.62 (s, 1H), 8.38 (d,  $J$  = 5.2 Hz, 1H), 7.74 (t,  $J$  = 1.7 Hz, 1H), 7.63 (d,  $J$  = 7.8 Hz, 1H), 7.60 – 7.53 (m, 1H), 7.50 – 7.44 (m, 2H), 7.37 (ddd,  $J$  = 7.9, 1.9, 1.0 Hz, 1H), 7.31 – 7.20 (m, 3H), 7.20 – 7.08 (m, 1H), 6.52 (dd,  $J$  = 3.5, 1.7 Hz, 1H), 2.08 (s, 3H) ppm;  $^{13}\text{C NMR}$  (75 MHz,  $\text{CDCl}_3$ )  $\delta$  164.9, 164.7, 163.5, 159.7, 158.2, 156.7, 151.3, 151.1, 148.0, 145.5, 140.7, 136.9, 136.7, 134.6, 133.8, 131.6, 131.3, 129.8, 127.5, 126.8, 125.9, 125.3, 123.8, 117.8, 117.2, 114.2, 114.0, 113.6, 112.7, 110.0, 109.8, 101.2, 15.9 ppm; HRMS (ESI) calcd for  $[\text{C}_{22}\text{H}_{16}\text{N}_3\text{O}_3\text{Cl}+\text{H}]^+$  406.0880, found 406.0954.

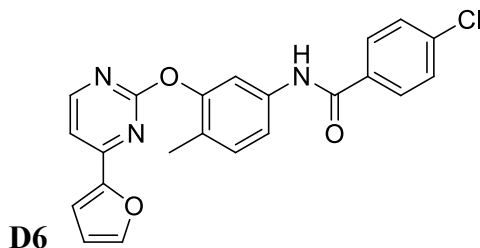

**4-chloro-N-(3-((4-(furan-2-yl)pyrimidin-2-yl)oxy)-4-methylphenyl)benzamide:** A round bottom flask was charged with 0.26 g **8**

**3-((4-(furan-2-yl)pyrimidin-2-yl)oxy)-4-methylaniline**, 0.14 g of 4-chlorobenzoic acid and 10 mL DCM. 0.15 g HOBt and 0.21 g of EDCI were added to the solution at room temperature. After stirring for 2 hours, 20 mL distilled water was added and the mixture was extracted with 20 mL DCM for two times. The organic layers were combined and washed with water and brine. The solvent was removed under reduced pressure and the residue was purified through flash chromatography on silica gel with DCM:MeOH = 100:1(v:v) as eluent. 0.32 g of **D6** was obtained in the yield of 81%. HPLC  $R_t$  = 15.3 min, purity: 99%;  $^1\text{H NMR}$  (300 MHz,  $\text{CDCl}_3$ )  $\delta$  8.60 (s, 1H), 8.37 (d,  $J$  = 5.1 Hz, 1H), 7.70 (d,  $J$  = 8.4 Hz, 2H), 7.56 (s, 1H), 7.46 (d,  $J$  = 7.1 Hz, 2H), 7.37 – 7.19 (m, 4H), 7.15 (d,  $J$  = 8.4 Hz, 1H), 6.53 (d,  $J$  = 1.6 Hz, 1H), 2.10 (s, 3H) ppm;  $^{13}\text{C NMR}$  (75 MHz,  $\text{CDCl}_3$ )  $\delta$  165.0, 164.9, 159.7, 158.2, 151.3, 151.1, 145.5, 137.8, 137.0, 133.2, 131.3, 128.7, 128.7, 126.8, 117.8, 114.3, 113.6, 112.7, 109.8, 15.9 ppm; HRMS (ESI) calcd for  $[\text{C}_{22}\text{H}_{16}\text{N}_3\text{O}_3\text{Cl}+\text{H}]^+$  406.0880, found 406.0951.

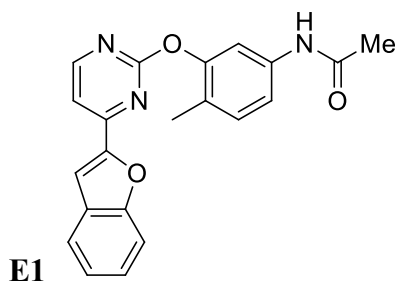

**N-(3-((4-(benzofuran-2-yl)pyrimidin-2-yl)oxy)-4-methylphenyl)acetamide:** A round bottom flask was charged with 0.32 g **8**

**3-((4-(benzofuran-2-yl)pyrimidin-2-yl)oxy)-4-methylaniline**, 0.07 g of acetic acid and 10 mL DCM. 0.15 g HOBt and 0.21 g of EDCI were added to the solution at room temperature. After stirring for 2 hours, 20 mL distilled water was added and the mixture was extracted with 20 mL DCM for two times. The organic layers were

combined and washed with water and brine. The solvent was removed under reduced pressure and the residue was purified through flash chromatography on silica gel with DCM:MeOH = 100:1(v:v) as eluent. 0.33 g of **E1** was obtained in the yield of 92%. HPLC  $R_t$  = 13.3 min, purity: 99%;  $^1\text{H}$  NMR (300 MHz,  $\text{CDCl}_3$ )  $\delta$  8.54 (d,  $J$  = 5.1 Hz, 1H), 7.88 (s, 1H), 7.70 – 7.58 (m, 2H), 7.53 (dd,  $J$  = 9.5, 6.8 Hz, 2H), 7.46 – 7.23 (m, 5H), 7.19 (d,  $J$  = 8.2 Hz, 1H), 2.15 (s, 3H), 2.07 (s, 3H) ppm;  $^{13}\text{C}$  NMR (75 MHz,  $\text{CDCl}_3$ )  $\delta$  168.4, 165.1, 160.3, 158.6, 155.8, 152.3, 151.3, 137.2, 131.3, 128.1, 126.8, 126.2, 123.7, 122.5, 117.2, 113.6, 111.8, 110.8, 109.4, 24.4, 15.9 ppm; HRMS (ESI) calcd for  $[\text{C}_{21}\text{H}_{17}\text{N}_3\text{O}_3+\text{H}]^+$  360.1270, found 360.1362.

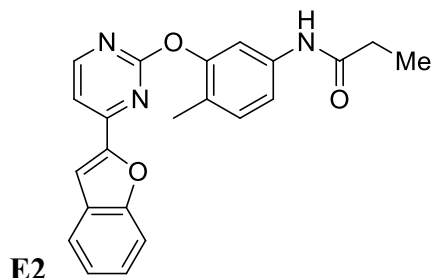

**N-(3-((4-(benzofuran-2-yl)pyrimidin-2-yl)oxy)-4-methylphenyl)propionamide:** A round bottom flask was charged with 0.32 g **8**

**3-((4-(benzofuran-2-yl)pyrimidin-2-yl)oxy)-4-methylaniline**, 0.08 g of propionic acid and 10 mL DCM. 0.15 g HOBt and 0.21 g of EDCI were added to the solution at room temperature. After stirring for 2 hours, 20 mL distilled water was added and the mixture was extracted with 20 mL DCM for two times. The organic layers were combined and washed with water and brine. The solvent was removed under reduced pressure and the residue was purified through flash chromatography on silica gel with DCM:MeOH = 100:1(v:v) as eluent. 0.32 g of **E2** was obtained in the yield of 86%. HPLC  $R_t$  = 12.5 min, purity: 99%;  $^1\text{H}$  NMR (300 MHz,  $\text{CDCl}_3$ )  $\delta$  8.45 (d,  $J$  = 5.1 Hz, 1H), 7.56 (d,  $J$  = 8.0 Hz, 2H), 7.52 (s, 1H), 7.46 (d,  $J$  = 8.3 Hz, 1H), 7.42 (d,  $J$  = 5.1 Hz, 1H), 7.37 – 7.22 (m, 3H), 7.18 (t,  $J$  = 7.5 Hz, 1H), 7.10 (d,  $J$  = 8.2 Hz, 1H), 2.23 (q,  $J$  = 7.5 Hz, 2H), 2.07 (s, 3H), 1.09 (t,  $J$  = 7.5 Hz, 3H) ppm;  $^{13}\text{C}$  NMR (75 MHz,  $\text{CDCl}_3$ )  $\delta$  165.1, 160.3, 158.5, 155.8, 152.4, 151.4, 137.2, 131.3, 128.1, 126.7, 126.07, 123.7, 122.5, 117.1, 115.0, 113.6, 111.8, 110.8, 109.4, 30.6, 15.9, 9.6 ppm; HRMS (ESI) calcd for  $[\text{C}_{22}\text{H}_{19}\text{N}_3\text{O}_3+\text{H}]^+$  374.1426, found 374.1497.

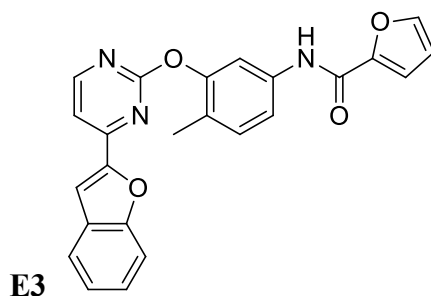

**N-(3-((4-(benzofuran-2-yl)pyrimidin-2-yl)oxy)-4-methylphenyl)furan-2-carboxamide:** A round bottom flask was charged with 0.32 g **8**

**3-((4-(benzofuran-2-yl)pyrimidin-2-yl)oxy)-4-methylaniline**, 0.12 g of

furan-2-carboxylic acid and 10 mL DCM. 0.15 g HOBt and 0.21 g of EDCI were added to the solution at room temperature. After stirring for 2 hours, 20 mL distilled water was added and the mixture was extracted with 20 mL DCM for two times. The organic layers were combined and washed with water and brine. The solvent was removed under reduced pressure and the residue was purified through flash chromatography on silica gel with DCM:MeOH = 100:1(v:v) as eluent. 0.36 g of **E4** was obtained in the yield of 87%. HPLC  $R_t = 12.8$  min, purity: 96%;  $^1\text{H}$  NMR (300 MHz,  $\text{CDCl}_3$ )  $\delta$  8.49 (d,  $J = 5.1$  Hz, 1H), 8.08 (s, 1H), 7.61 – 7.52 (m, 2H), 7.52 – 7.35 (m, 5H), 7.35 – 7.25 (m, 1H), 7.18 (dd,  $J = 9.0, 5.7$  Hz, 2H), 7.11 (d,  $J = 3.3$  Hz, 1H), 6.42 (dd,  $J = 3.4, 1.7$  Hz, 1H), 2.11 (s, 3H) ppm;  $^{13}\text{C}$  NMR (75 MHz,  $\text{CDCl}_3$ )  $\delta$  165.1, 160.5, 158.5, 156.0, 155.8, 152.5, 151.6, 147.8, 144.2, 136.4, 131.4, 128.2, 126.7, 126.7, 123.6, 122.5, 117.2, 115.2, 113.8, 112.6, 111.8, 110.7, 109.3, 16.0 ppm; HRMS (ESI) calcd for  $[\text{C}_{24}\text{H}_{17}\text{N}_3\text{O}_4+\text{H}]^+$  412.1219, found 412.1291.

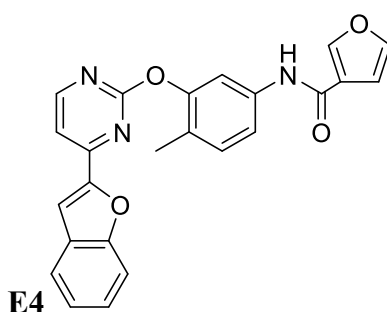

**N-(3-((4-(benzofuran-2-yl)pyrimidin-2-yl)oxy)-4-methylphenyl)furan-3-carboxamide:** A round bottom flask was charged with 0.32 g **8** **3-((4-(benzofuran-2-yl)pyrimidin-2-yl)oxy)-4-methylaniline**, 0.12 g of furan-3-carboxylic acid and 10 mL DCM. 0.15 g HOBt and 0.21 g of EDCI were added to the solution at room temperature. After stirring for 2 hours, 20 mL distilled water was added and the mixture was extracted with 20 mL DCM for two times. The organic layers were combined and washed with water and brine. The solvent was removed under reduced pressure and the residue was purified through flash chromatography on silica gel with DCM:MeOH = 100:1(v:v) as eluent. 0.33 g of **E5** was obtained in the yield of 80%. HPLC  $R_t = 12.0$  min, purity: 99%;  $^1\text{H}$  NMR (300 MHz,  $\text{CDCl}_3$ )  $\delta$  8.42 (d,  $J = 5.1$  Hz, 1H), 8.08 (s, 1H), 7.90 (s, 1H), 7.57 – 7.46 (m, 2H), 7.46 – 7.33 (m, 4H), 7.33 – 7.24 (m, 2H), 7.16 (t,  $J = 7.5$  Hz, 1H), 7.09 (d,  $J = 7.9$  Hz, 1H), 6.63 (d,  $J = 0.9$  Hz, 1H), 2.05 (s, 3H) ppm;  $^{13}\text{C}$  NMR (75 MHz,  $\text{CDCl}_3$ )  $\delta$  165.0, 160.9, 160.4, 158.5, 155.8, 152.3, 151.4, 145.2, 143.8, 136.8, 131.4, 128.1, 126.8, 126.6, 123.7, 123.0, 122.5, 117.8, 114.2, 111.8, 110.8, 109.4, 108.5, 15.9 ppm; HRMS (ESI) calcd for  $[\text{C}_{24}\text{H}_{17}\text{N}_3\text{O}_4+\text{H}]^+$  412.1219, found 412.1289.

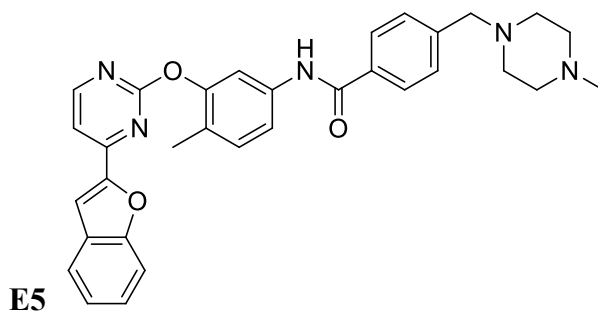

**N-(3-((4-(benzofuran-2-yl)pyrimidin-2-yl)oxy)-4-methylphenyl)-4-((4-methylpiperazin-1-yl)methyl)benzamide:** A round bottom flask was charged with 0.32 g **8** **3-((4-(benzofuran-2-yl)pyrimidin-2-yl)oxy)-4-methylaniline**, 0.50 g of 3-(4-methylpiperazin-1-yl)-2-oxopropanoic acid and 10 mL DCM. 0.15 g HOBt and 0.21 g of EDCI were added to the solution at room temperature. After stirring for 2 hours, 20 mL distilled water was added and the mixture was extracted with 20 mL DCM for two times. The organic layers were combined and washed with water and brine. The solvent was removed under reduced pressure and the residue was purified through flash chromatography on silica gel with DCM:MeOH = 10:1(v:v) as eluent. 0.25 g of **G2** was obtained in the yield of 47%. HPLC  $R_t$  = 6.8 min, purity: 99%;  $^1\text{H}$  NMR (300 MHz,  $\text{CDCl}_3$ )  $\delta$  8.58 (d,  $J$  = 5.1 Hz, 1H), 7.87 (s, 1H), 7.79 (d,  $J$  = 8.1 Hz, 2H), 7.72 – 7.60 (m, 2H), 7.55 (dd,  $J$  = 6.3, 4.6 Hz, 3H), 7.51 – 7.33 (m, 4H), 7.33 – 7.21 (m, 3H), 3.55 (s, 2H), 2.46 (s, 8H), 2.29 (s, 3H), 2.21 (s, 3H) ppm;  $^{13}\text{C}$  NMR (75 MHz,  $\text{CDCl}_3$ )  $\delta$  167.6, 165.0, 160.5, 158.5, 155.8, 152.4, 151.5, 136.5, 131.4, 128.1, 126.8, 126.7, 125.6, 124.4, 123.7, 122.5, 118.7, 116.9, 113.4, 111.8, 110.8, 110.4, 109.3, 61.5, 54.3, 51.8, 44.7, 16.0 ppm; HRMS (ESI) calcd for  $[\text{C}_{32}\text{H}_{31}\text{N}_5\text{O}_3+\text{H}]^+$  534.2427, found 534.2520.

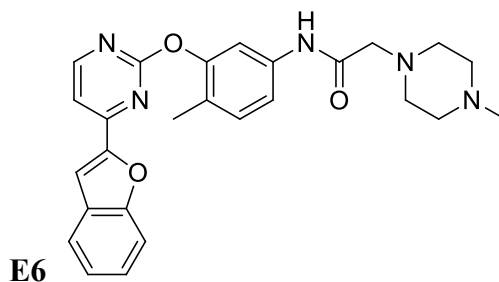

**N-(3-((4-(benzofuran-2-yl)pyrimidin-2-yl)oxy)-4-methylphenyl)-2-(4-methylpiperazin-1-yl)acetamide:** A round bottom flask was charged with 0.32 g **8** **3-((4-(benzofuran-2-yl)pyrimidin-2-yl)oxy)-4-methylaniline**, 0.30 g of 3-(4-methylpiperazin-1-yl)-2-oxopropanoic acid and 10 mL DCM. 0.15 g HOBt and 0.21 g of EDCI were added to the solution at room temperature. After stirring for 2 hours, 20 mL distilled water was added and the mixture was extracted with 20 mL DCM for two times. The organic layers were combined and washed with water and brine. The solvent was removed under reduced pressure and the residue was purified through flash chromatography on silica gel with DCM:MeOH = 10:1(v:v) as eluent. 0.29 g of **G2** was obtained in the yield of 63%. HPLC  $R_t$  = 7.9 min, purity: 97%;  $^1\text{H}$  NMR (300 MHz,  $\text{CDCl}_3$ )  $\delta$  9.14 (s, 1H), 8.57 (d,  $J$  = 5.1 Hz, 1H), 7.66 (d,  $J$  = 7.7 Hz, 1H), 7.63 (d,  $J$  = 0.8 Hz, 1H), 7.59 – 7.54 (m, 1H), 7.53 (d,  $J$  = 5.1 Hz, 1H), 7.48 (d,  $J$

= 2.0 Hz, 1H), 7.46 – 7.35 (m, 2H), 7.32 – 7.21 (m, 2H), 3.11 (s, 2H), 2.64 (s, 4H), 2.48 (s, 4H), 2.29 (s, 3H), 2.18 (s, 3H) ppm; <sup>13</sup>C NMR (75 MHz, CDCl<sub>3</sub>) δ 164.4, 164.1, 159.5, 157.5, 154.8, 151.5, 150.5, 141.7, 136.0, 132.7, 130.4, 128.3, 127.2, 126.0, 125.7, 122.6, 121.5, 116.4, 112.9, 110.8, 109.7, 108.3, 61.5, 54.1, 52.1, 45.0, 15.0 ppm; HRMS (ESI) calcd for [C<sub>26</sub>H<sub>27</sub>N<sub>5</sub>O<sub>3</sub>+H]<sup>+</sup> 458.2114, found 458.1998.

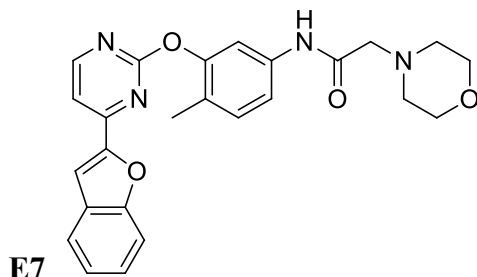

**N-(3-((4-(benzofuran-2-yl)pyrimidin-2-yl)oxy)-4-methylphenyl)-2-morpholinoacetamide:** A round bottom flask was charged with 0.32 g **8**

**3-((4-(benzofuran-2-yl)pyrimidin-2-yl)oxy)-4-methylaniline**, 0.30 g of 2-morpholinoacetic acid and 10 mL DCM. 0.15 g HOBt and 0.21 g of EDCI were added to the solution at room temperature. After stirring for 2 hours, 20 mL distilled water was added and the mixture was extracted with 20 mL DCM for two times. The organic layers were combined and washed with water and brine. The solvent was removed under reduced pressure and the residue was purified through flash chromatography on silica gel with DCM:MeOH = 10:1(v:v) as eluent. 0.23 g of **G3** was obtained in the yield of 51%. HPLC R<sub>t</sub> = 8.1 min, purity: 99%; <sup>1</sup>H NMR (300 MHz, CDCl<sub>3</sub>) δ 8.99 (s, 1H), 8.49 (d, J = 5.1 Hz, 1H), 7.62 – 7.52 (m, 2H), 7.52 – 7.38 (m, 3H), 7.32 (dd, J = 7.9, 6.7 Hz, 2H), 7.26 – 7.13 (m, 2H), 3.72 – 3.59 (m, 4H), 3.03 (s, 2H), 2.57 – 2.44 (m, 4H), 2.10 (s, 3H) ppm; <sup>13</sup>C NMR (75 MHz, CDCl<sub>3</sub>) δ 167.8, 165.1, 160.5, 158.5, 155.8, 152.4, 151.5, 136.5, 131.4, 128.1, 126.7, 126.6, 123.7, 122.4, 116.8, 113.2, 111.5, 110.7, 109.3, 67.0, 62.4, 53.8, 16.0 ppm; HRMS (ESI) calcd for [C<sub>25</sub>H<sub>24</sub>N<sub>4</sub>O<sub>4</sub>+H]<sup>+</sup> 445.1798, found 445.1875.

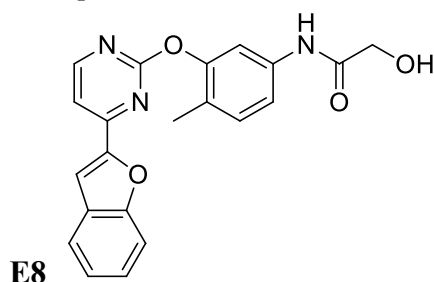

**N-(3-((4-(benzofuran-2-yl)pyrimidin-2-yl)oxy)-4-methylphenyl)-2-hydroxyacetamide:** A round bottom flask was charged with 0.32 g **8**

**3-((4-(benzofuran-2-yl)pyrimidin-2-yl)oxy)-4-methylaniline**, 0.30 g of 2-hydroxyacetic acid and 10 mL DCM. 0.15 g HOBt and 0.21 g of EDCI were added to the solution at room temperature. After stirring for 2 hours, 20 mL distilled water was added and the mixture was extracted with 20 mL DCM for two times. The organic layers were combined and washed with water and brine. The solvent was removed under reduced pressure and the residue was purified through flash chromatography on silica gel with DCM:MeOH = 10:1(v:v) as eluent. 0.12 g of **G4**

was obtained in the yield of 31%. HPLC  $R_t = 5.9$  min, purity: 99%;  $^1\text{H NMR}$  (300 MHz,  $\text{CDCl}_3$ )  $\delta$  9.73 (s, 1H), 8.72 (d,  $J = 5.1$  Hz, 1H), 7.81 (d,  $J = 9.1$  Hz, 2H), 7.76 – 7.67 (m, 2H), 7.63 (s, 1H), 7.50 (dd,  $J = 15.7, 8.3$  Hz, 2H), 7.35 (t,  $J = 7.5$  Hz, 1H), 7.26 (d,  $J = 8.3$  Hz, 1H), 5.65 (t,  $J = 5.9$  Hz, 1H), 3.98 (d,  $J = 5.9$  Hz, 2H), 3.33 (s, 8H), 2.07 (s, 3H) ppm;  $^{13}\text{C NMR}$  (75 MHz,  $\text{CDCl}_3$ )  $\delta$  171.3, 165.0, 161.7, 157.9, 155.6, 152.4, 151.4, 138.1, 131.3, 128.1, 127.5, 125.1, 124.3, 123.2, 117.1, 113.5, 112.2, 111.6, 109.9, 62.3, 15.9 ppm; HRMS (ESI) calcd for  $[\text{C}_{21}\text{H}_{17}\text{N}_3\text{O}_4+\text{H}]^+$  376.1219, found 376.1298.

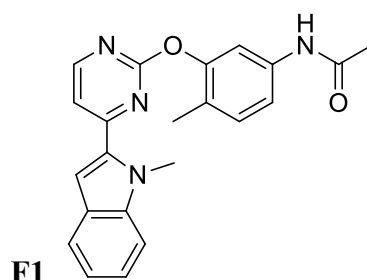

**N-(4-methyl-3-((4-(1-methyl-1H-indol-2-yl)pyrimidin-2-yl)oxy)phenyl)acetamide:**

A round bottom flask was charged with 0.33 g **8**

**4-methyl-3-((4-(1-methyl-1H-indol-2-yl)pyrimidin-2-yl)oxy)aniline**, 0.07 g of acetic acid and 10 mL DCM. 0.15 g HOBt and 0.21 g of EDCI were added to the solution at room temperature. After stirring for 2 hours, 20 mL distilled water was added and the mixture was extracted with 20 mL DCM for two times. The organic layers were combined and washed with water and brine. The solvent was removed under reduced pressure and the residue was purified through flash chromatography on silica gel with DCM:MeOH = 50:1(v:v) as eluent. 0.31 g of **F1** was obtained in the yield of 84%. HPLC  $R_t = 11.7$  min, purity: 99%;  $^1\text{H NMR}$  (300 MHz,  $\text{DMSO-}d_6$ )  $\delta$  8.52 (d,  $J = 5.2$  Hz, 1H), 8.40 (s, 1H), 7.86-7.97 (m, 1H), 7.70-7.47 (m, 4H), 7.31 (d,  $J = 1.8$  Hz, 1H), 7.24 (t,  $J = 7.4$  Hz, 1H), 6.99 (t,  $J = 7.4$  Hz, 1H), 3.89 (s, 3H), 2.10 (s, 3H), 2.06 (s, 3H) ppm;  $^{13}\text{C NMR}$  (75 MHz,  $\text{DMSO-}d_6$ )  $\delta$  168.7, 165.3, 164.6, 159.1, 151.9, 138.9, 138.0, 134.0, 131.3, 126.0, 125.1, 122.8, 122.7, 121.4, 116.2, 113.4, 112.1, 110.8, 110.7, 33.6, 24.4, 16.0 ppm; HRMS (ESI) calcd for  $[\text{C}_{22}\text{H}_{20}\text{N}_4\text{O}_2+\text{H}]^+$  373.1586, found 373.1660.

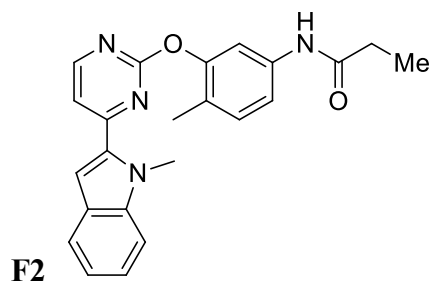

**N-(4-methyl-3-((4-(1-methyl-1H-indol-2-yl)pyrimidin-2-yl)oxy)phenyl)propionamide:**

A round bottom flask was charged with 0.33 g **8**

**4-methyl-3-((4-(1-methyl-1H-indol-2-yl)pyrimidin-2-yl)oxy)aniline**, 0.08 g of propionic acid and 10 mL DCM. 0.15 g HOBt and 0.21 g of EDCI were added to the solution at room temperature. After stirring for 2 hours, 20 mL distilled water was added and the mixture was extracted with 20 mL DCM for two times. The organic



layers were combined and washed with water and brine. The solvent was removed under reduced pressure and the residue was purified through flash chromatography on silica gel with DCM:MeOH = 50:1(v:v) as eluent. 0.33 g of **F1** was obtained in the yield of 85%. HPLC  $R_t$  = 12.1 min, purity: 99%;  $^1\text{H NMR}$  (300 MHz,  $\text{DMSO-}d_6$ )  $\delta$  9.91 (s, 1H), 8.44 (d,  $J$  = 5.4 Hz, 1H), 8.38 (s, 1H), 7.82 (d,  $J$  = 8.0 Hz, 1H), 7.59 – 7.39 (m, 4H), 7.28 (d,  $J$  = 8.3 Hz, 1H), 7.20 (t,  $J$  = 7.2 Hz, 1H), 6.96 (t,  $J$  = 7.3 Hz, 1H), 3.85 (s, 3H), 3.33 (s, 5H), 2.29 (q,  $J$  = 7.5 Hz, 2H), 2.06 (s, 3H), 1.06 (t,  $J$  = 7.5 Hz, 3H) ppm;  $^{13}\text{C NMR}$  (75 MHz,  $\text{DMSO-}d_6$ )  $\delta$  171.9, 164.8, 164.1, 158.6, 151.5, 138.5, 137.6, 133.5, 130.8, 125.5, 124.5, 122.3, 122.2, 120.9, 115.7, 112.9, 110.4, 110.3, 33.1, 29.5, 15.5, 9.6 ppm; HRMS (ESI) calcd for  $[\text{C}_{23}\text{H}_{22}\text{N}_4\text{O}_2+\text{H}]^+$  387.1743, found 387.1822.

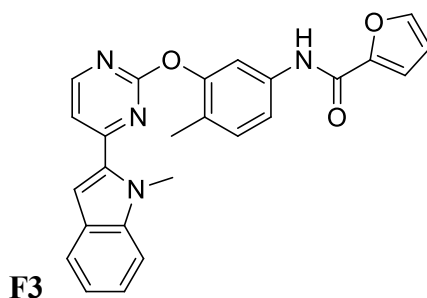

**N-(4-methyl-3-((4-(1-methyl-1H-indol-2-yl)pyrimidin-2-yl)oxy)phenyl)furan-2-carboxamide:** A round bottom flask was charged with 0.33 g **8**

**4-methyl-3-((4-(1-methyl-1H-indol-2-yl)pyrimidin-2-yl)oxy)aniline**, 0.12 g of furan-2-carboxylic acid and 10 mL DCM. 0.15 g HOBt and 0.21 g of EDCI were added to the solution at room temperature. After stirring for 2 hours, 20 mL distilled water was added and the mixture was extracted with 20 mL DCM for two times. The organic layers were combined and washed with water and brine. The solvent was removed under reduced pressure and the residue was purified through flash chromatography on silica gel with DCM:MeOH = 50:1(v:v) as eluent. 0.37 g of **F4** was obtained in the yield of 97%. HPLC  $R_t$  = 11.8 min, purity: 99%;  $^1\text{H NMR}$  (300 MHz,  $\text{DMSO-}d_6$ )  $\delta$  10.33 (s, 1H), 8.47 (d,  $J$  = 5.4 Hz, 1H), 8.38 (s, 1H), 8.00 – 7.91 (m, 2H), 7.88 (d,  $J$  = 8.0 Hz, 1H), 7.79 – 7.67 (m, 2H), 7.61 – 7.44 (m, 5H), 7.36 (d,  $J$  = 8.2 Hz, 1H), 7.19 (dd,  $J$  = 11.3, 4.0 Hz, 1H), 6.99 (t,  $J$  = 7.6 Hz, 1H), 3.85 (s, 3H), 2.12 (s, 3H) ppm;  $^{13}\text{C NMR}$  (75 MHz,  $\text{DMSO-}d_6$ )  $\delta$  164.8, 164.1, 158.6, 156.1, 151.4, 147.4, 145.6, 137.7, 137.6, 133.5, 130.8, 125.6, 125.5, 122.3, 122.2, 121.0, 117.0, 114.6, 114.1, 112.1, 111.6, 110.4, 110.3, 33.0, 15.5 ppm; HRMS (ESI) calcd for  $[\text{C}_{25}\text{H}_{20}\text{N}_4\text{O}_3+\text{H}]^+$  425.1535, found 425.1609.

### Cell culture

Liver cancer cell lines of Hep3B, MHCC97-L, QGY-7703, SMMC-7721 and SNU368 were obtained from HD Biosciences (China) Co., Ltd. Hep3B cells were cultured in DMEM medium and all the other cell lines in RPMI 1640 medium. All media contained 10% fetal bovine serum (FBS) (Bioind, US origin) and all cells were incubated in a humidified atmosphere of 5 %  $\text{CO}_2$  at 37 °C. All the cell lines were

authenticated by using short tandem repeat (STR) matching analysis. No mycoplasma contamination was detected.

#### **CellTiter-Glo luminescent cell viability assay**

For experiments hepatocellular carcinoma cells were seeded at 4000 cells per well in 96-well plates. After overnight incubation, solution of compounds in DMSO at various concentrations were added to the cells and further incubated for 120 h. Cell viability was measured with the CellTiter-Glo Luminescent Cell Viability Assay (Promega) according to the manufacturer's instructions. Luminescence was measured using an EnVision Multilabel Plate Reader (Perkin-Elmer). The cytotoxicity of the compounds was expressed as the percentage of luminescence relative to that of untreated cells. The concentration of compound producing 50% of cell proliferation ( $IC_{50}$ ) was calculated by nonlinear regression analysis of the response-concentration (log) curve, using the Graph-Pad Prism program package (Graph Pad Software; San Diego, CA). Results are expressed as the means of two dependent experiments performed in triplicate.

**Supplementary Table S1** PDGFR kinase inhibition of 2-phenyloxypyrimidine derivatives

| Compound ID | Inhibition effect (%) <sup>a</sup> |               | IC <sub>50</sub> (μM) <sup>b</sup> |               | Selectivity index <sup>c</sup> |
|-------------|------------------------------------|---------------|------------------------------------|---------------|--------------------------------|
|             | PDGFR $\alpha$                     | PDGFR $\beta$ | PDGFR $\alpha$                     | PDGFR $\beta$ |                                |
| A1          | 39.11                              | 21.40         | N.D. <sup>d</sup>                  | N.D.          | N.D.                           |
| A2          | 65.72                              | 40.73         | N.D.                               | N.D.          | N.D.                           |
| A3          | 45.45                              | 45.50         | N.D.                               | N.D.          | N.D.                           |
| A4          | 66.71                              | 43.74         | N.D.                               | N.D.          | N.D.                           |
| A5          | 45.20                              | 33.70         | N.D.                               | N.D.          | N.D.                           |
| A6          | 47.73                              | 35.96         | N.D.                               | N.D.          | N.D.                           |
| A7          | 62.93                              | 40.23         | N.D.                               | N.D.          | N.D.                           |
| A8          | 55.65                              | 43.24         | N.D.                               | N.D.          | N.D.                           |
| A9          | 23.63                              | 23.41         | N.D.                               | N.D.          | N.D.                           |
| A10         | 40.63                              | 30.94         | N.D.                               | N.D.          | N.D.                           |
| A11         | 42.91                              | 6.84          | N.D.                               | N.D.          | N.D.                           |
| A12         | 43.17                              | 31.94         | N.D.                               | N.D.          | N.D.                           |
| B1          | 2.32                               | 12.87         | N.D.                               | N.D.          | N.D.                           |
| B2          | 21.09                              | 17.63         | N.D.                               | N.D.          | N.D.                           |
| B3          | 23.12                              | 26.17         | N.D.                               | N.D.          | N.D.                           |
| B4          | 35.04                              | 24.42         | N.D.                               | N.D.          | N.D.                           |
| B5          | 1.81                               | 19.39         | N.D.                               | N.D.          | N.D.                           |
| B6          | 12.21                              | 18.64         | N.D.                               | N.D.          | N.D.                           |
| B7          | 31.49                              | 16.63         | N.D.                               | N.D.          | N.D.                           |
| B8          | 26.17                              | 37.71         | N.D.                               | N.D.          | N.D.                           |
| B9          | 21.34                              | 19.14         | N.D.                               | N.D.          | N.D.                           |
| B10         | 19.57                              | 15.63         | N.D.                               | N.D.          | N.D.                           |
| B11         | 32.00                              | 5.08          | N.D.                               | N.D.          | N.D.                           |
| B12         | 25.66                              | 20.65         | N.D.                               | N.D.          | N.D.                           |
| C1          | 33.27                              | 1.32          | N.D.                               | N.D.          | N.D.                           |
| C2          | 33.78                              | 2.07          | N.D.                               | N.D.          | N.D.                           |
| C3          | 46.46                              | 11.61         | N.D.                               | N.D.          | N.D.                           |
| C4          | 13.73                              | 2.83          | N.D.                               | N.D.          | N.D.                           |
| C5          | 16.27                              | 5.08          | N.D.                               | N.D.          | N.D.                           |
| C6          | 24.14                              | -0.94         | N.D.                               | N.D.          | N.D.                           |
| D1          | 13.74                              | 28.93         | N.D.                               | N.D.          | N.D.                           |
| D2          | 36.82                              | 46.75         | N.D.                               | N.D.          | N.D.                           |
| D3          | 22.61                              | 37.72         | N.D.                               | N.D.          | N.D.                           |
| D4          | 45.70                              | 46.00         | N.D.                               | N.D.          | N.D.                           |
| D5          | 51.79                              | 43.49         | N.D.                               | N.D.          | N.D.                           |
| D6          | 33.02                              | 37.47         | N.D.                               | N.D.          | N.D.                           |
| E1          | 1.56                               | 1.82          | N.D.                               | N.D.          | N.D.                           |
| E2          | 19.06                              | 10.10         | N.D.                               | N.D.          | N.D.                           |
| E3          | -2.00                              | 3.83          | N.D.                               | N.D.          | N.D.                           |

|           |              |              |             |             |             |
|-----------|--------------|--------------|-------------|-------------|-------------|
| E4        | 27.18        | 7.35         | N.D.        | N.D.        | N.D.        |
| <b>E5</b> | <b>86.12</b> | <b>66.41</b> | <b>0.40</b> | <b>0.93</b> | <b>2.32</b> |
| E6        | -1.24        | -0.44        | N.D.        | N.D.        | N.D.        |
| E7        | 18.56        | 19.39        | N.D.        | N.D.        | N.D.        |
| E8        | 26.16        | 14.62        | N.D.        | N.D.        | N.D.        |
| F1        | 6.37         | 2.32         | N.D.        | N.D.        | N.D.        |
| F2        | 12.21        | -4.46        | N.D.        | N.D.        | N.D.        |
| F3        | 24.14        | 25.67        | N.D.        | N.D.        | N.D.        |

<sup>a</sup> Inhibition effect (%): kinase inhibition activities of compounds at 1  $\mu$ M.

<sup>b</sup> IC<sub>50</sub>: 50% inhibitory concentration (averages of two separate experiments).

<sup>c</sup> Selectivity index=IC<sub>50</sub> (PDGFR $\beta$ )/ IC<sub>50</sub> (PDGFR $\alpha$ ).

<sup>d</sup> N.D. = not determined.

**Supplementary Table S2** Anti-proliferative activity of 2-phenyloxypyrimidine derivatives on HCC cell lines determined by CellTiter-Glo luminescent cell viability assay (IC<sub>50</sub>, μM)

| Compound ID | BEL740<br>4 | Hep3<br>B | MHCC97-<br>L | QGY-770<br>3 | SMMC-772<br>1 | SNU36<br>8 |
|-------------|-------------|-----------|--------------|--------------|---------------|------------|
| A1          | 10.8        | 15.8      | 15.1         | 24.5         | 13.6          | 85.7       |
| A2          | 39.3        | 39.5      | >200         | 59.8         | 84.3          | 112.2      |
| A3          | 32.8        | 21.2      | 22.3         | 47.0         | 25.1          | 51.4       |
| A4          | 12.2        | 17.5      | 24.5         | 39.8         | 17.5          | 54.0       |
| A5          | 15.6        | 23.3      | 31.3         | 40.5         | 23.5          | 49.5       |
| A6          | 9.5         | 10.7      | 16.2         | 21.9         | 12.3          | 24.0       |
| A7          | 32.8        | 18.9      | 51.5         | 57.8         | 27.2          | 45.9       |
| A8          | 20.1        | 14.3      | 34.6         | 24.6         | 10.1          | 25.7       |
| A9          | 23.8        | 28.4      | 53.2         | 48.4         | 26.8          | 51.5       |
| A10         | 28.2        | 20.1      | 35.7         | 43.4         | 21.1          | 38.7       |
| A11         | 74.2        | 105.4     | 89.3         | 252.0        | 79.7          | 94.6       |
| A12         | 133.7       | 130.3     | 281.3        | 170.4        | 112.6         | 286.6      |
| B1          | 10.5        | 2.7       | 4.9          | 5.8          | 2.7           | 17.7       |
| B2          | 14.4        | 13.0      | 16.9         | 20.6         | 11.7          | 24.8       |
| B3          | 3.7         | 4.6       | 6.1          | 7.3          | 6.0           | 12.8       |
| B4          | 9.5         | 6.4       | 7.0          | 10.2         | 6.2           | 12.9       |
| B5          | 7.9         | 9.2       | 9.8          | 14.9         | 8.4           | 15.8       |
| B6          | 13.4        | 7.9       | 10.5         | 15.4         | 9.7           | 15.0       |
| B7          | 18.3        | 15.5      | >200         | 25.8         | 17.0          | 14.0       |
| B8          | 9.9         | 9.0       | 14.0         | 14.4         | 7.5           | 12.0       |
| B9          | 12.9        | 83.2      | >200         | 19.2         | 13.8          | 16.8       |
| B10         | 8.1         | 5.8       | 6.3          | 10.9         | 3.9           | 12.6       |
| B11         | 21.6        | 44.2      | 53.5         | 81.1         | 20.2          | 18.0       |
| B12         | 13.4        | 17.7      | 44.0         | 27.6         | 8.8           | 18.0       |
| C1          | 36.2        | 32.0      | 108.6        | 91.6         | 21.0          | 43.0       |
| C2          | 48.2        | 36.3      | 110.7        | 119.5        | 29.5          | 55.9       |
| C3          | 39.7        | 33.5      | 91.0         | 70.7         | 27.2          | 37.9       |
| C4          | 8.8         | 22.9      | 96.4         | 14.9         | 12.0          | 15.8       |
| C5          | 20.8        | 17.0      | 28.0         | 35.2         | 16.8          | 28.4       |
| C6          | 6.7         | 19.7      | >200         | 19.2         | 14.3          | 17.2       |
| D1          | 48.7        | 11.4      | 1.6          | 2.5          | 1.5           | 37.3       |
| D2          | 32.8        | 28.3      | 26.4         | 42.2         | 21.6          | 43.8       |
| D3          | 17.6        | 9.7       | 8.5          | 15.7         | 7.9           | 22.2       |
| D4          | 4.5         | 6.0       | 3.4          | 7.5          | 3.7           | 23.2       |
| D5          | 12.4        | 11.2      | 14.7         | 22.5         | 12.4          | 24.0       |
| D6          | 10.9        | 7.3       | 24.6         | 25.8         | 8.2           | 12.7       |
| E1          | 10.1        | 86.8      | 5.7          | 0.3          | 0.3           | 8.5        |
| E2          | 8.2         | 74.6      | 5.5          | 0.4          | 0.2           | 13.2       |

---

|           |            |            |             |             |            |            |
|-----------|------------|------------|-------------|-------------|------------|------------|
| E3        | 1.2        | 125.0      | 9.6         | 0.7         | 0.7        | 1.3        |
| E4        | 5.2        | 15.8       | 0.0         | 0.0         | 0.4        | 11.4       |
| <b>E5</b> | <b>0.8</b> | <b>2.6</b> | <b>10.0</b> | <b>15.1</b> | <b>1.0</b> | <b>8.9</b> |
| E6        | 38.1       | 11.7       | 16.7        | 29.5        | 27.7       | 31.6       |
| E7        | 5.9        | 9.0        | 59.1        | 10.3        | 4.6        | 14.7       |
| E8        | 2.8        | 3.8        | 13.6        | 3.3         | 2.5        | 6.3        |
| F1        | 37.1       | 31.0       | 48.4        | 195.4       | 34.5       | 29.3       |
| F2        | 19.0       | 33.8       | 31.8        | 51.9        | 27.9       | 29.1       |
| F3        | 15.6       | 41.8       | >200        | 97.7        | 18.4       | 26.5       |

---

Supplementary Figure S1 Original gel images for Manuscript Fig. 5C

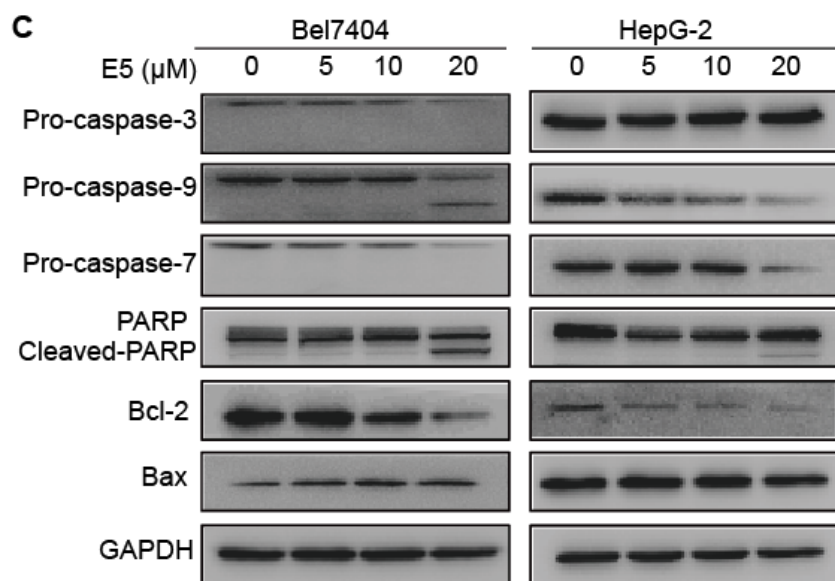

### Bel7404

Procaspase-3:

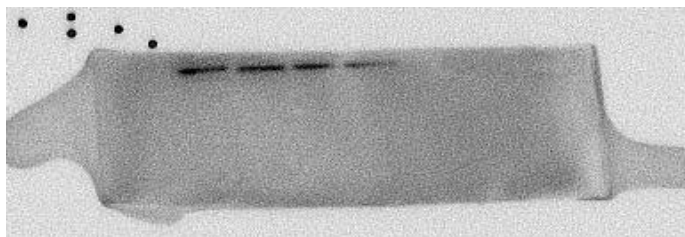

Procaspase-9:

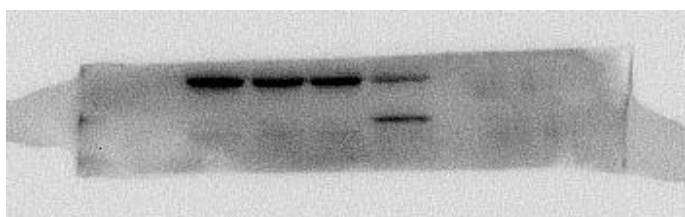

Procaspase-7:

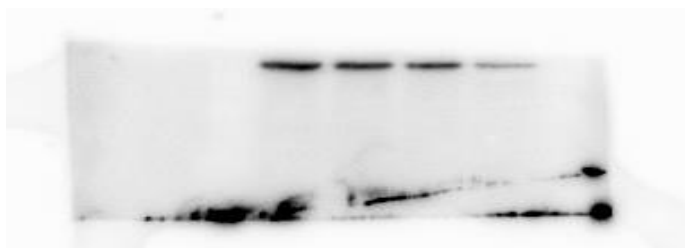

PARP:

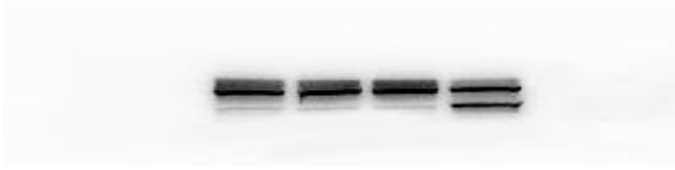

Bcl-2:

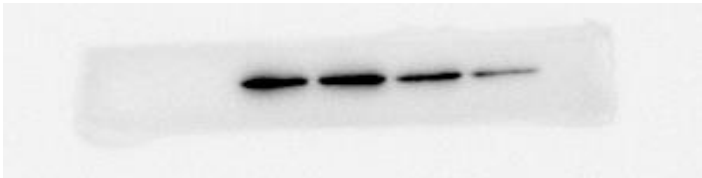

Bax :

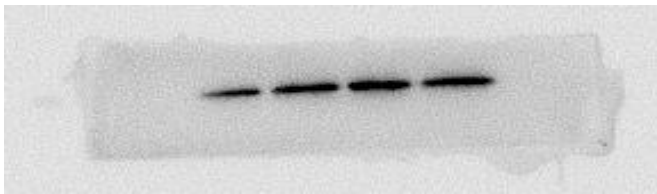

GAPDH:

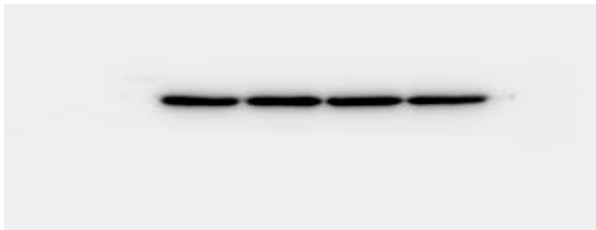

## HepG-2

Procasase-3:

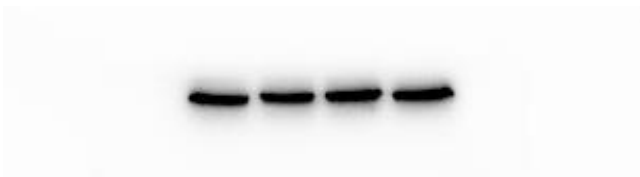



Procaspase-9:

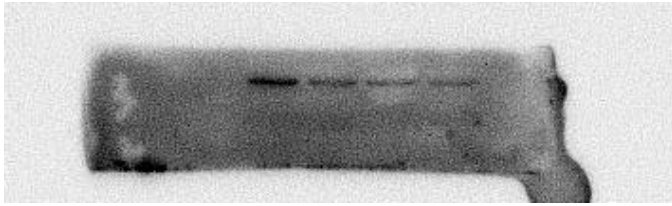

Procaspase-7:

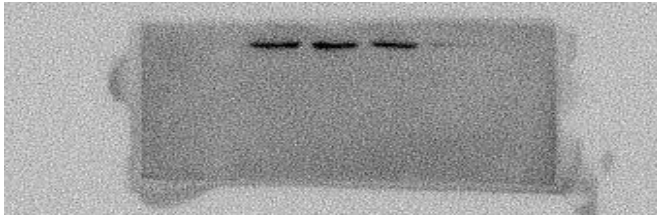

PARP:

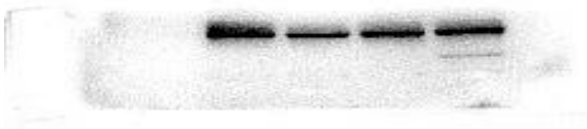

Bcl-2:

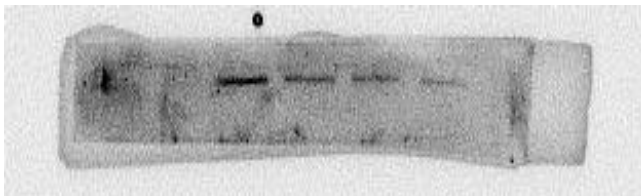

Bax :

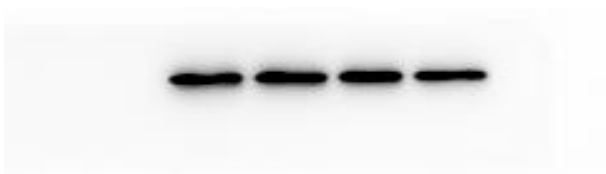

GAPDH:

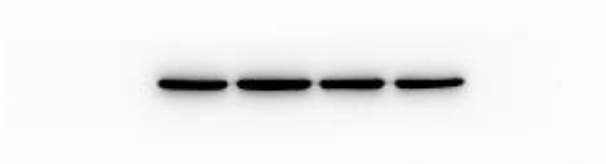

Supplementary Figure S2 Original gel images for Manuscript Fig. 6B

B

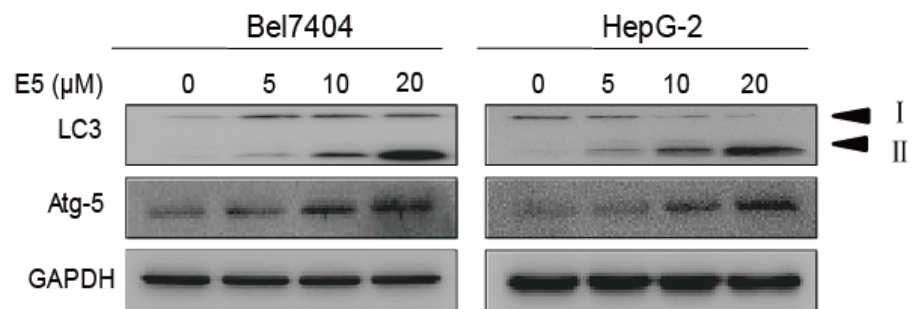

**Bel7404**

LC3:

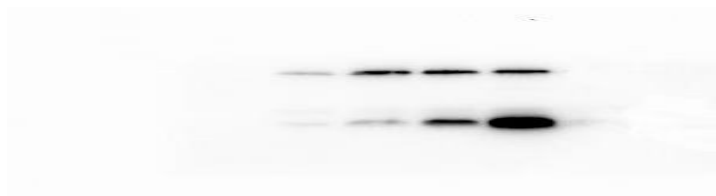

Atg-5:

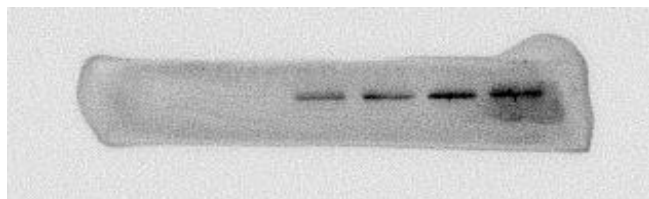

GAPDH:

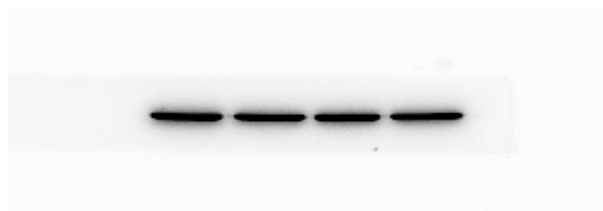

**HepG-2**

LC3:

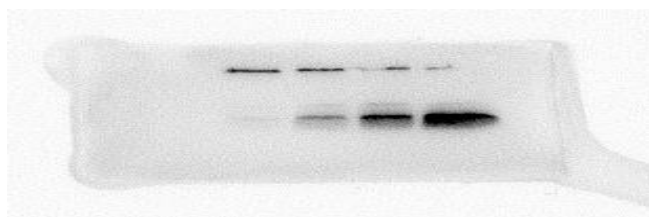

Atg-5:

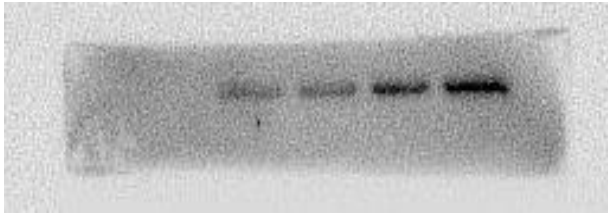

GAPDH:

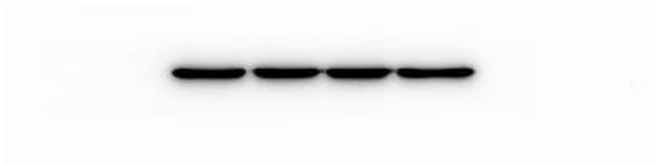

Supplementary Figure S3 Original gel images for Manuscript Fig. 6C

C

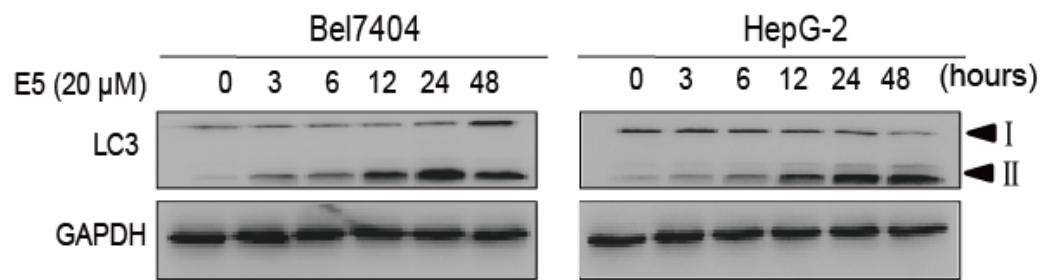

**Bel7404**

LC3:

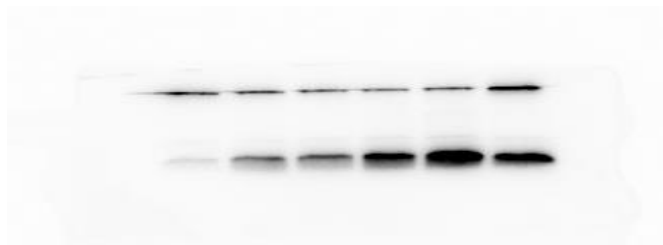

GAPDH:

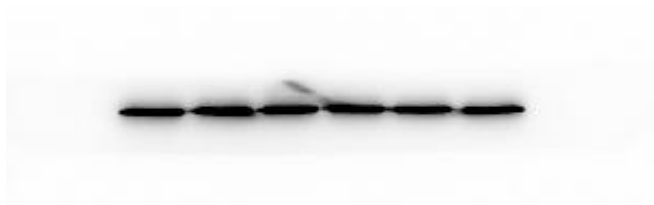

**HepG-2**

LC3:

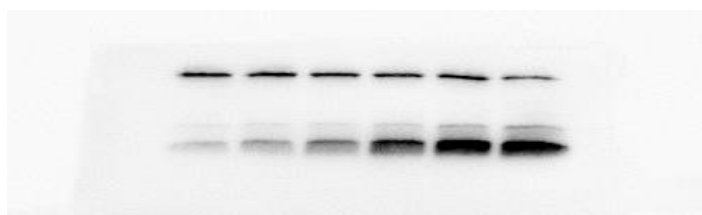

GAPDH:

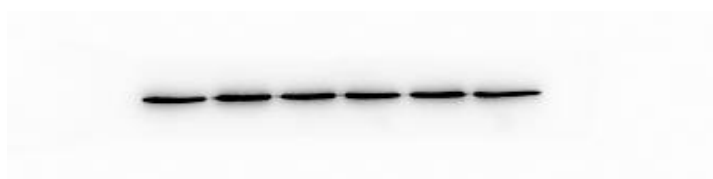

Supplementary Figure S4 Original gel images for Manuscript Fig. 6D

D

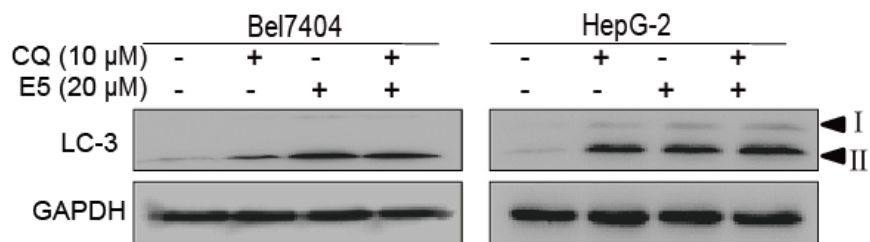

**Bel7404**

LC3:

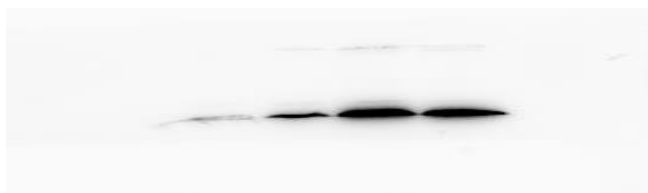

GAPDH:

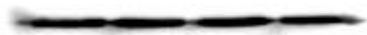

**HepG-2**

LC3:

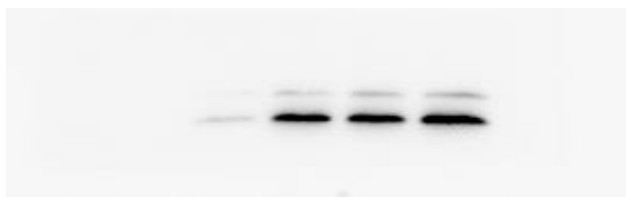

GAPDH:

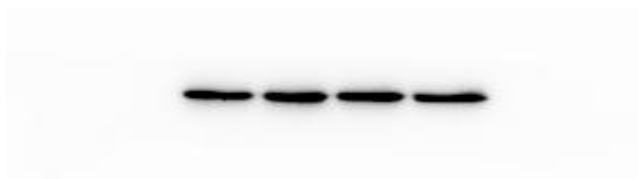

Supplementary Figure S5 Original gel images for Manuscript Fig. 6E

E

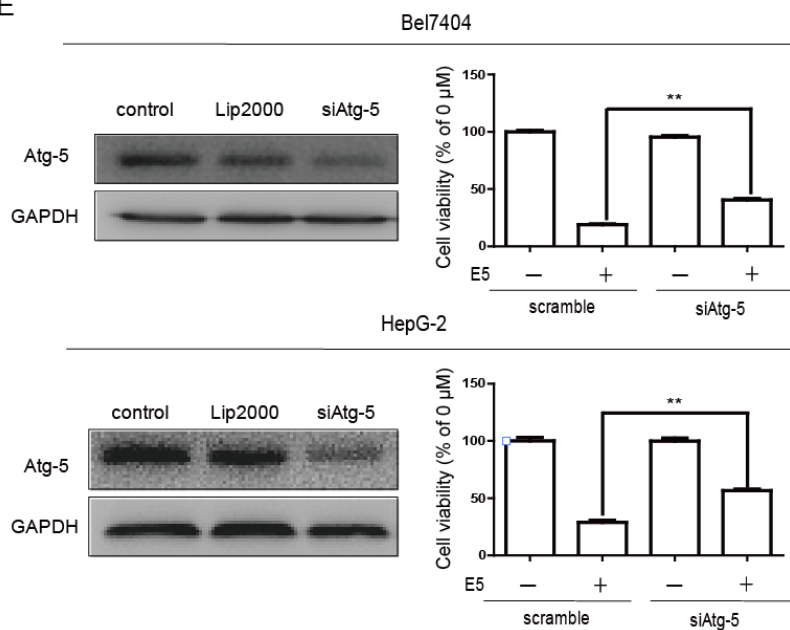

**Bel7404**

Atg-5:

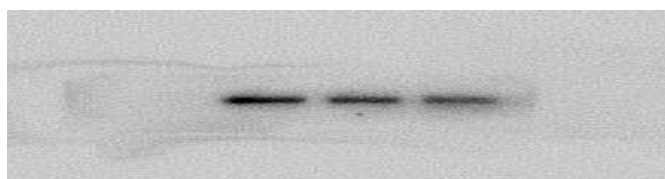

GAPDH:

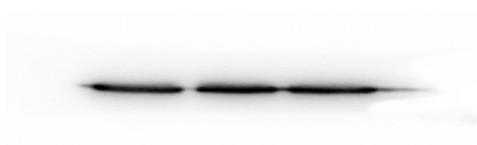

**HepG-2**

Atg-5:

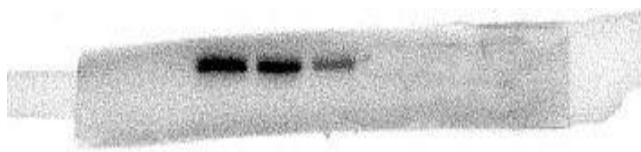

GAPDH:

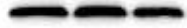

## Supplementary Figure S6 Original gel images for Manuscript Fig. 7A

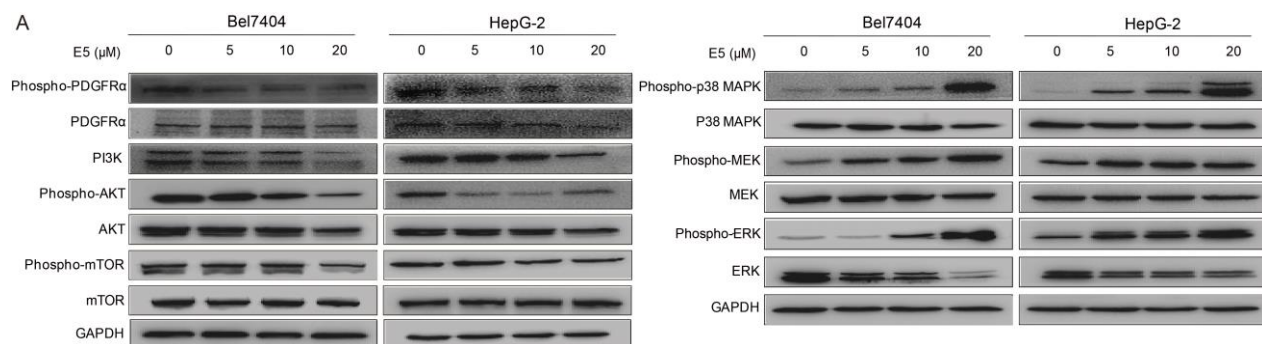

### Bel7404

Phospho-PDGFR $\alpha$ :

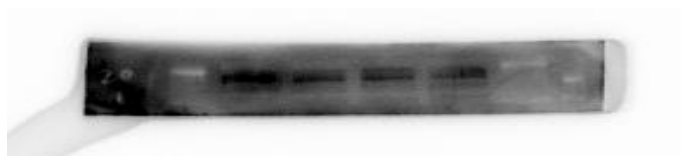

PDGFR $\alpha$ :

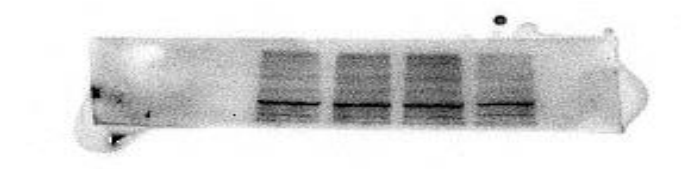

PI3K:

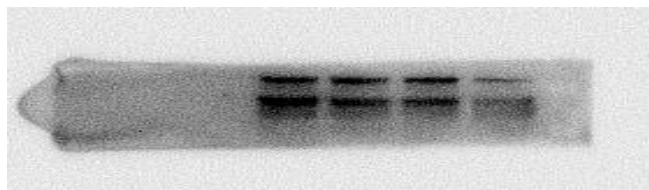

Phospho-AKT:

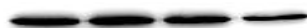



AKT:

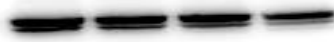

Phospho-mTOR:

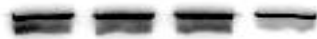

mTOR:

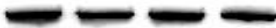

Phospho-p38 MAPK:

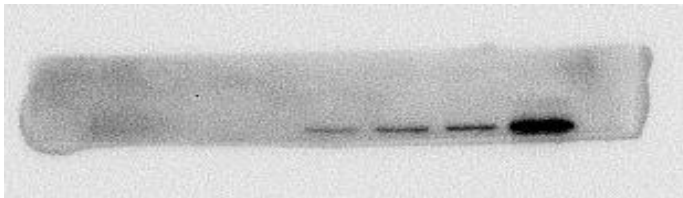

p38 MAPK:

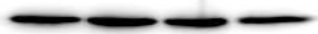

Phospho-MEK:

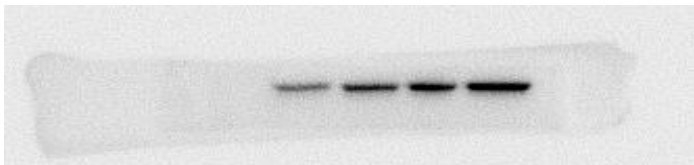

MEK:

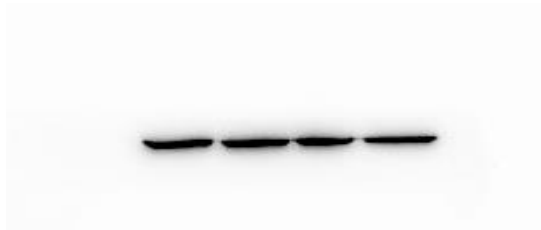

Phospho-ERK:

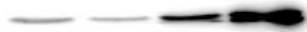

ERK:

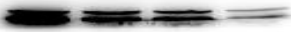

GAPDH:

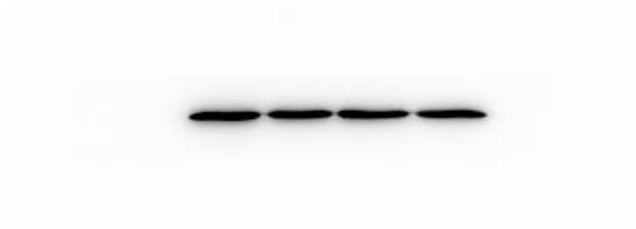

**HepG-2**

Phospho-PDGFR $\alpha$ :

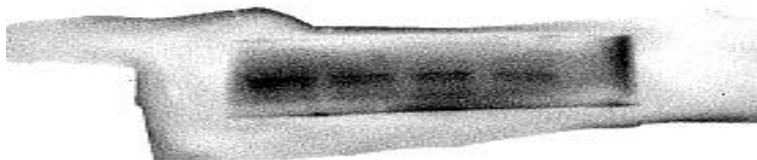

PDGFR $\alpha$ :

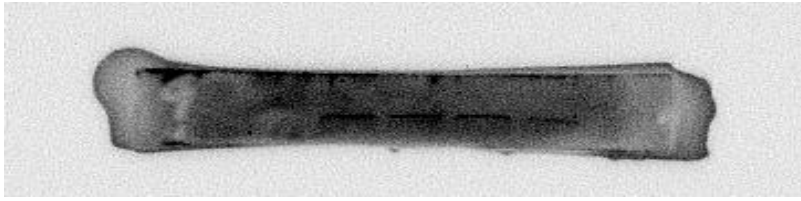

PI3K:

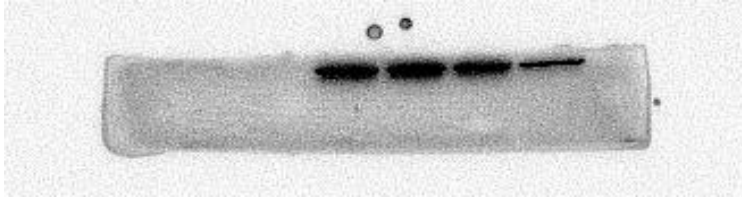

Phospho-AKT:

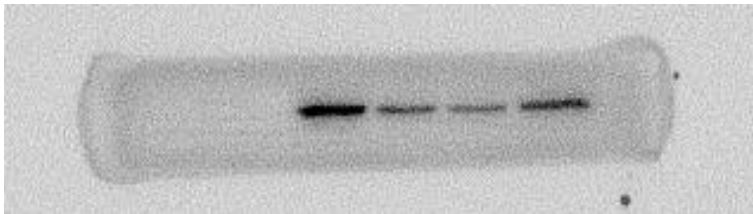

AKT:

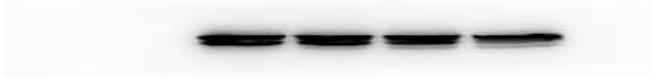

Phospho-mTOR:

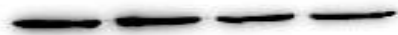

mTOR:

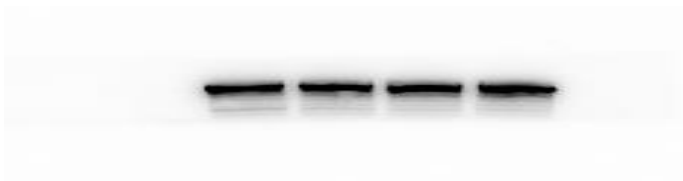

Phospho-p38 MAPK:

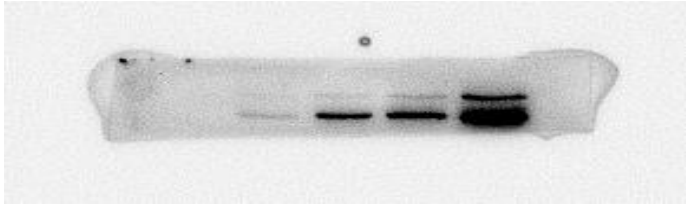

p38 MAPK:

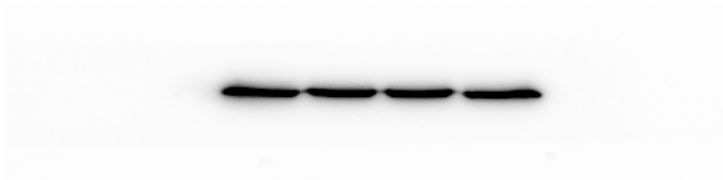

Phospho-MEK:

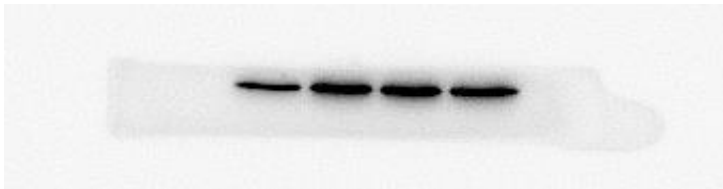

MEK:

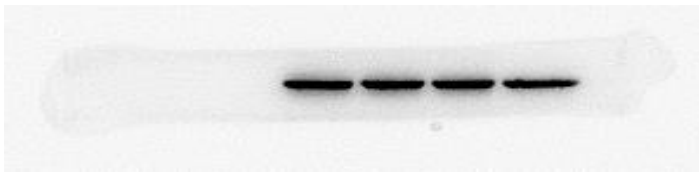

Phospho-ERK:

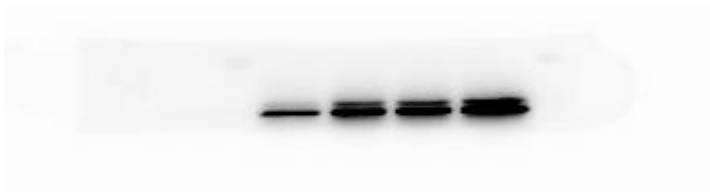

ERK:

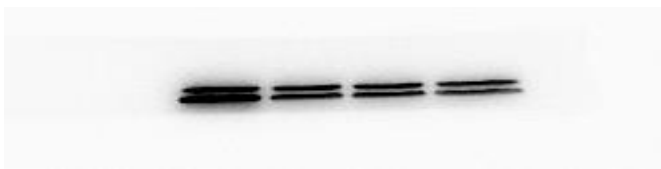

GAPDH:

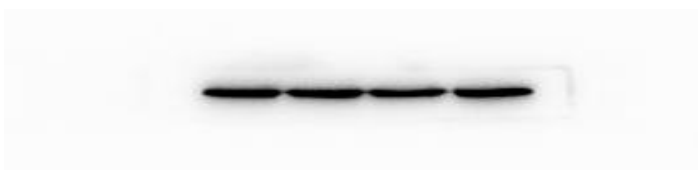

**Supplementary Figure S7 Original gel images for Manuscript Fig. 7B**

**B**

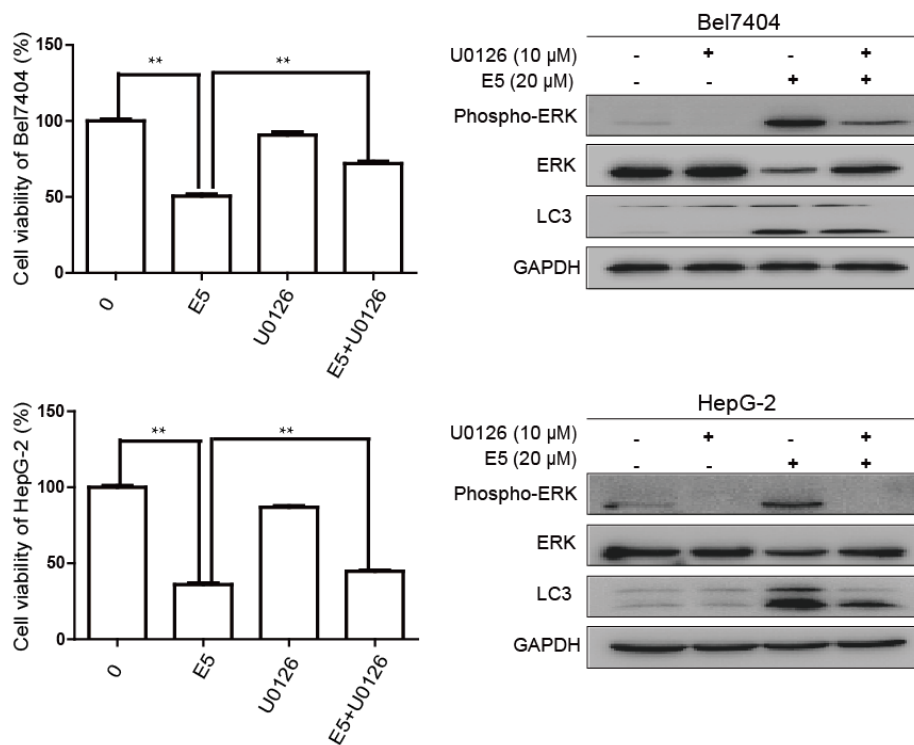

**Bel7404**

Phospho-ERK:

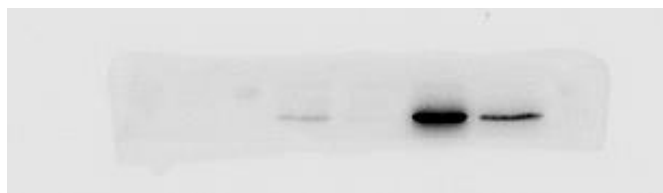

ERK:

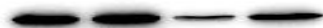

LC3:

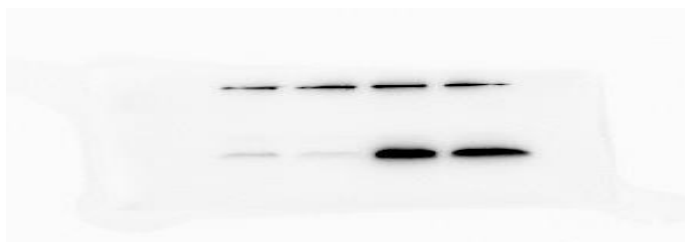

GAPDH:

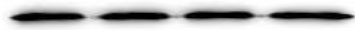

**HepG-2**

Phospho-ERK:

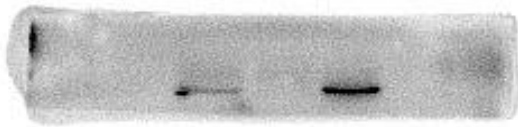

ERK:

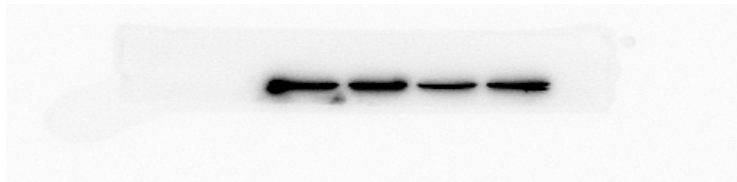

LC3:

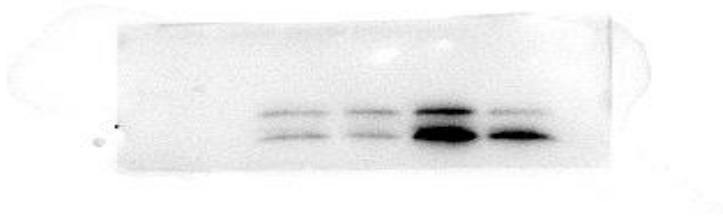

GAPDH:

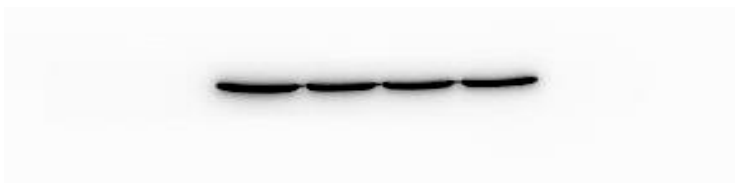

A1

SP1308303-2-C C13-NMR CDCL3 303K AV-300

165.354  
164.837  
163.994  
160.116  
150.960  
150.906  
147.664  
136.627  
134.755  
134.351  
132.409  
131.250  
130.861  
129.425  
128.151  
127.813  
126.588  
126.074  
123.477  
117.060  
113.635  
111.159

77.002  
76.577  
76.152

15.458

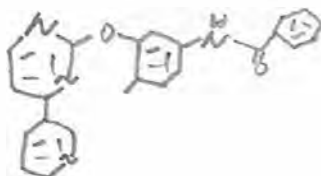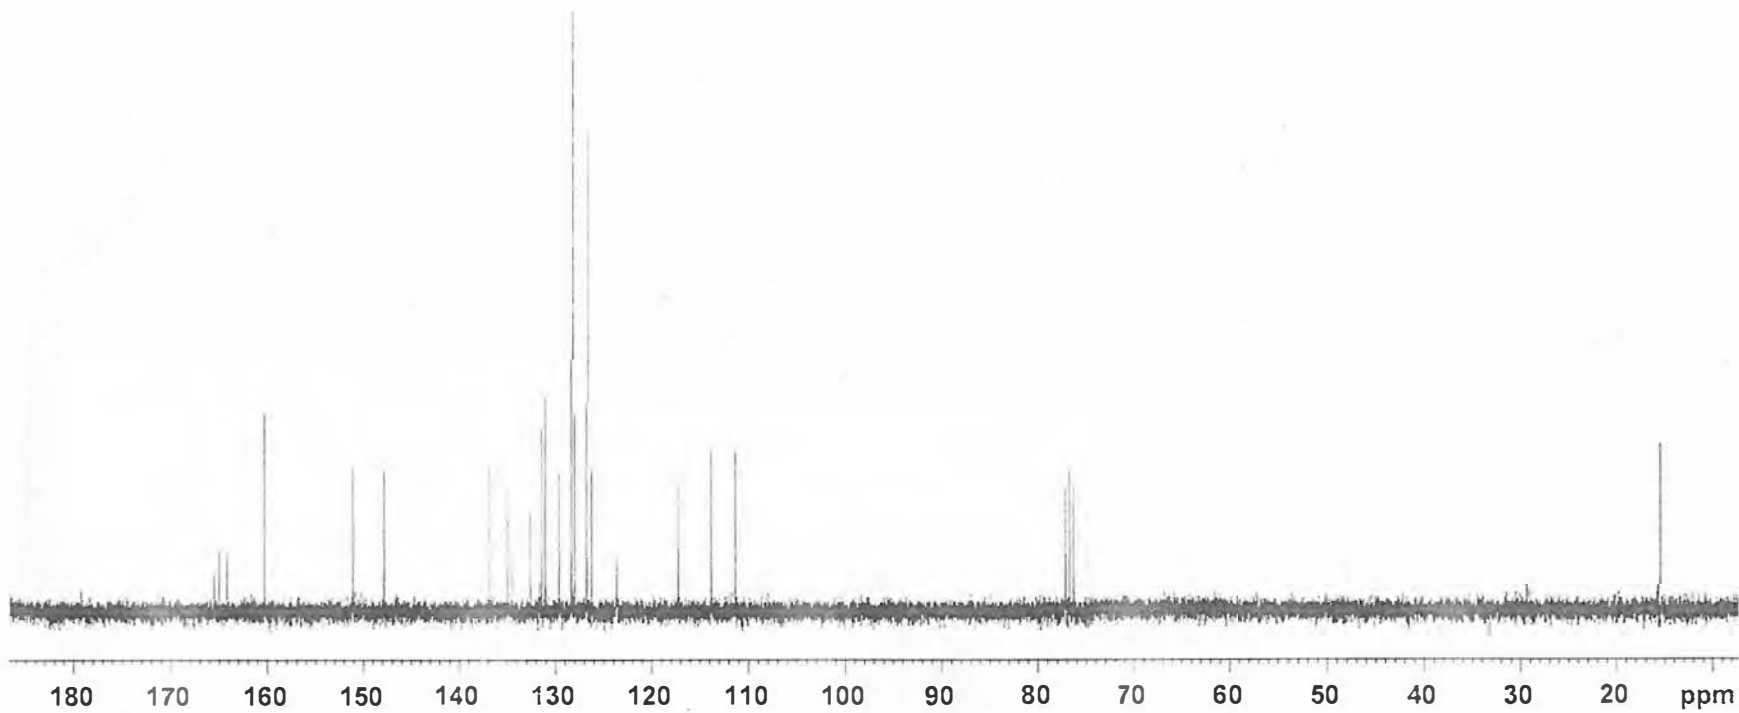

A1

## SP121031-2 1H-NMR CDCl3 303K AV-300

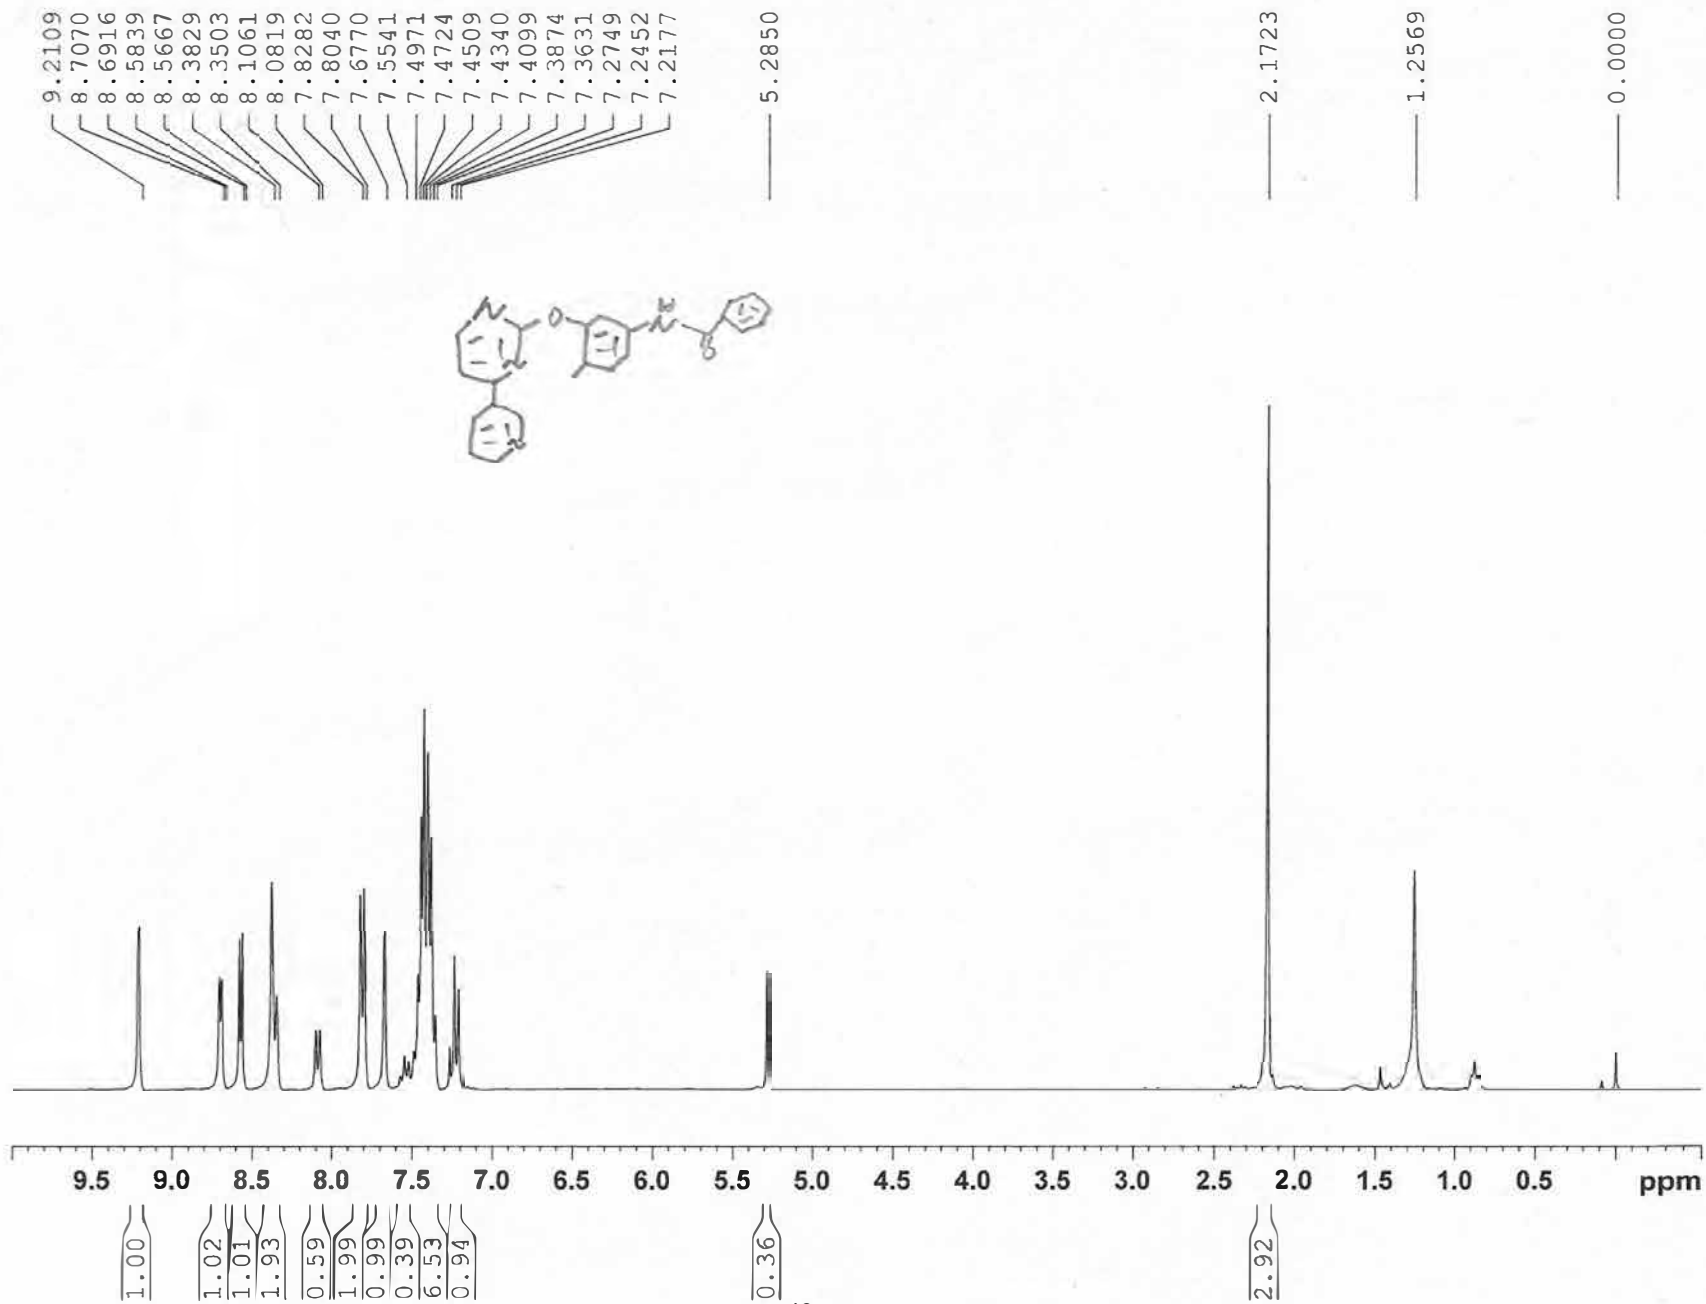



|                    |                     |                               |         |                        |                      |
|--------------------|---------------------|-------------------------------|---------|------------------------|----------------------|
| <b>Sample Name</b> |                     | <b>Position</b>               | p2d6    | <b>Instrument Name</b> | Instrument 1         |
| <b>User Name</b>   | QTOF-PC\QTOF        | <b>Inj Vol</b>                | 0.2     | <b>InjPosition</b>     |                      |
| <b>Sample Type</b> | Sample              | <b>IRM Calibration Status</b> | Success | <b>Data Filename</b>   | A1-p.d               |
| <b>ACQ Method</b>  | 20110418-MSonly-p.m | <b>Comment</b>                |         | <b>Acquired Time</b>   | 3/12/2018 2:50:16 PM |

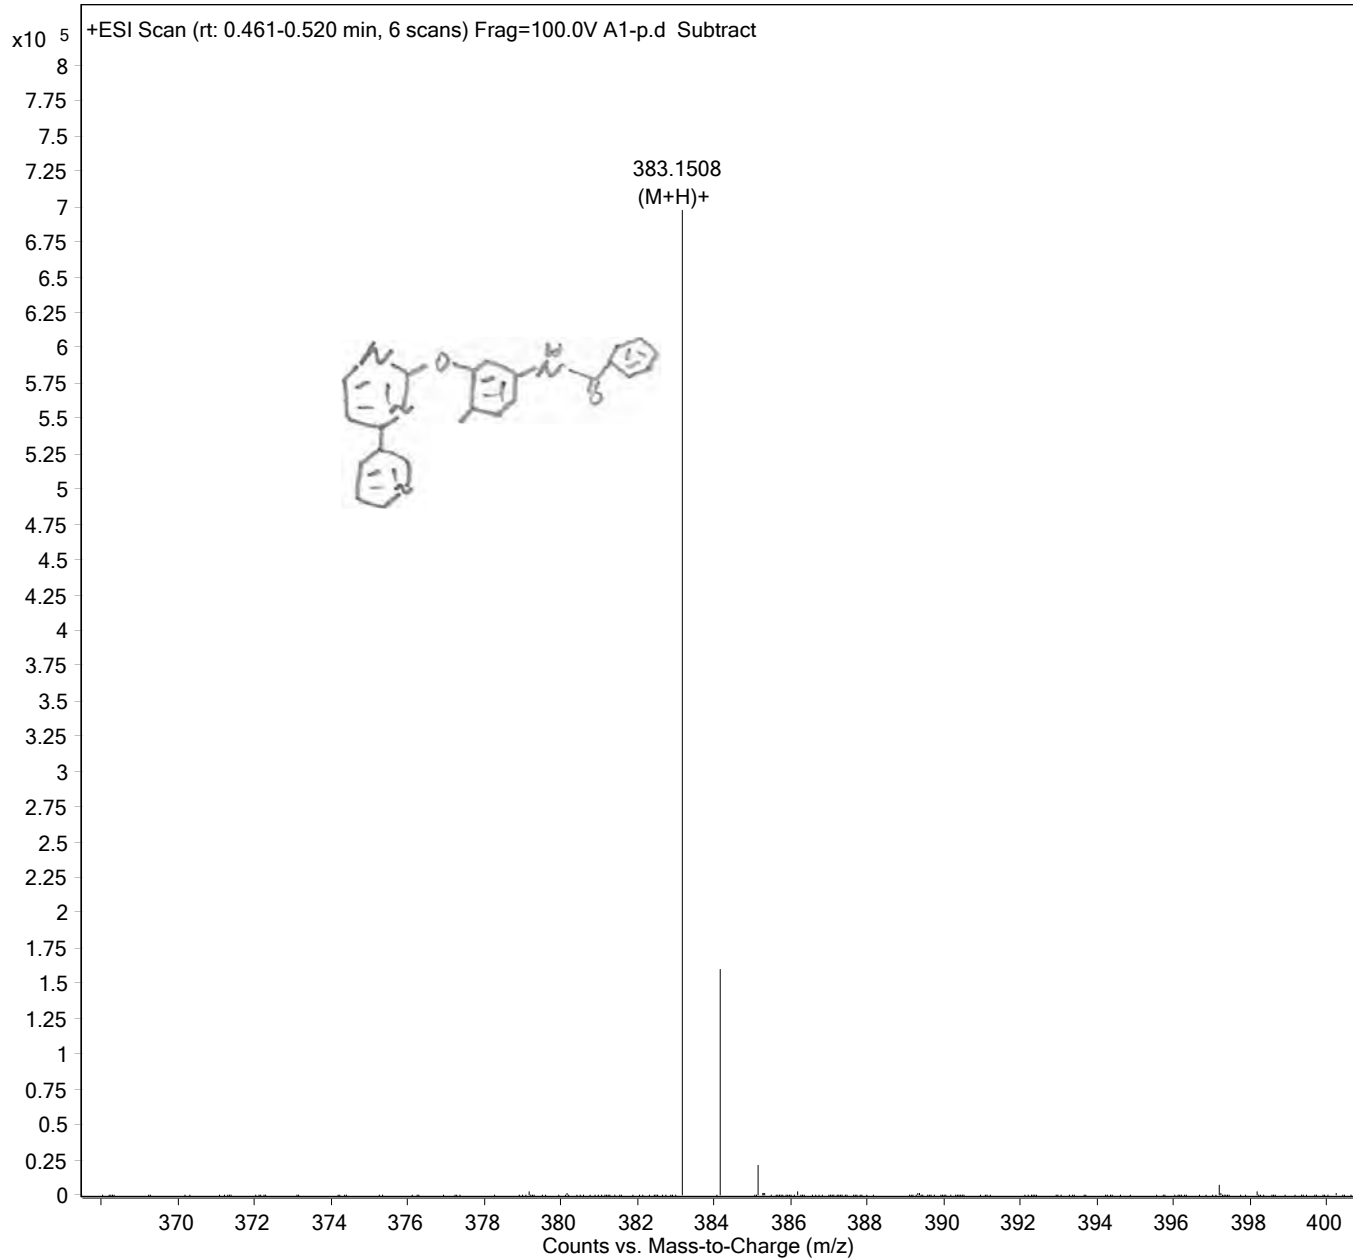

A2

SP121126 CDC13 303K C13-NMR AV300

169.162  
165.312  
164.658  
160.571  
151.905  
151.326  
148.547  
136.914  
134.888  
134.463  
131.774  
131.222  
127.504  
126.417  
123.829  
117.038  
113.617  
111.619

77.533  
77.110  
76.686

44.614

15.935

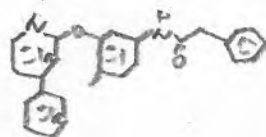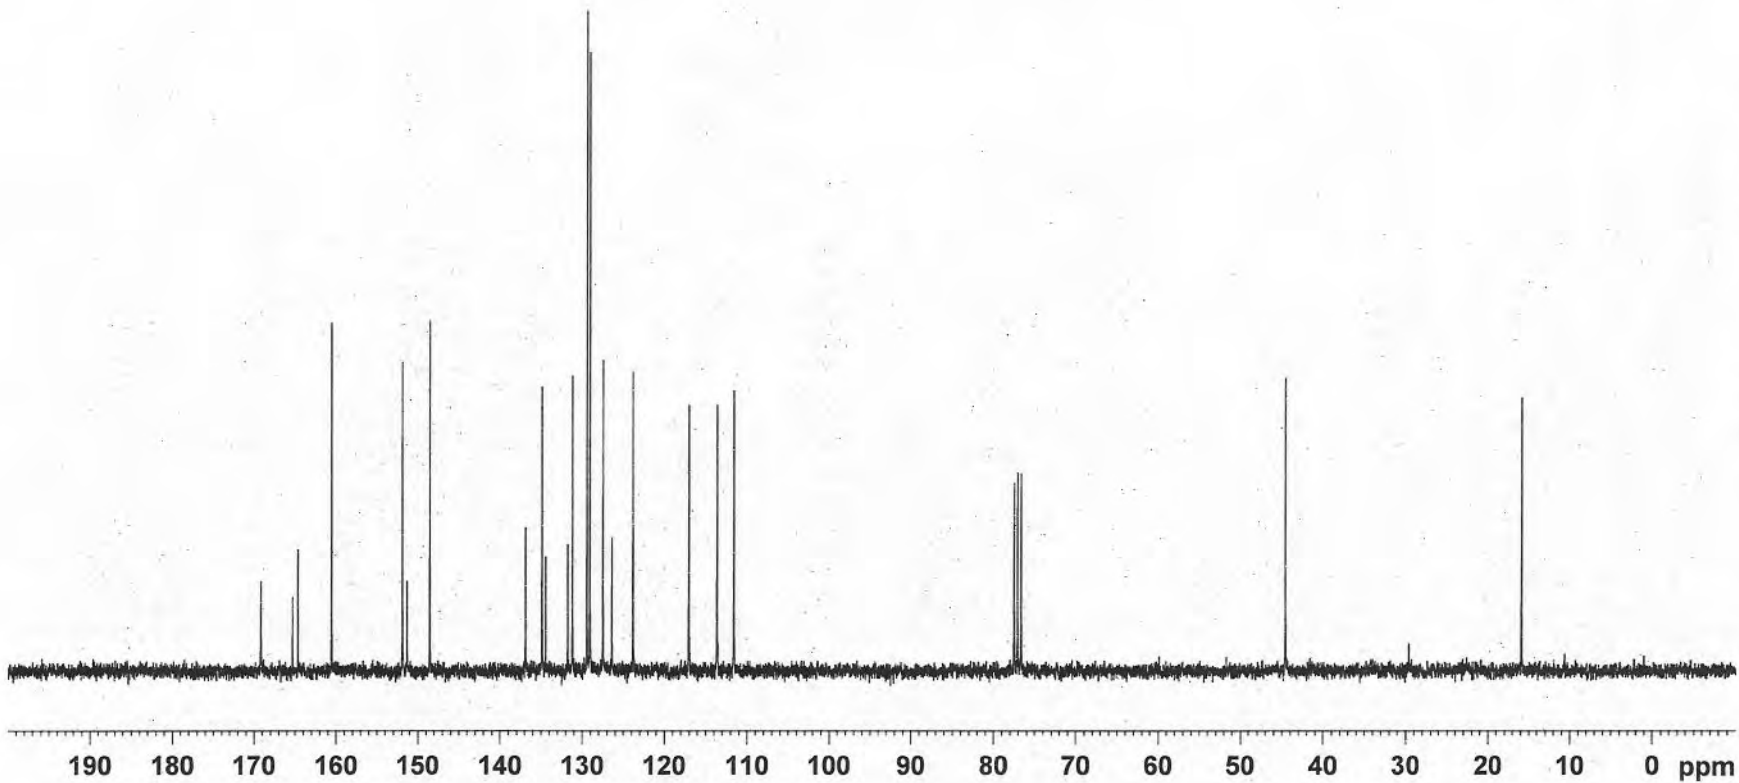

A2

SP121109-3 1H-NMR CDCl3 303K AV-300

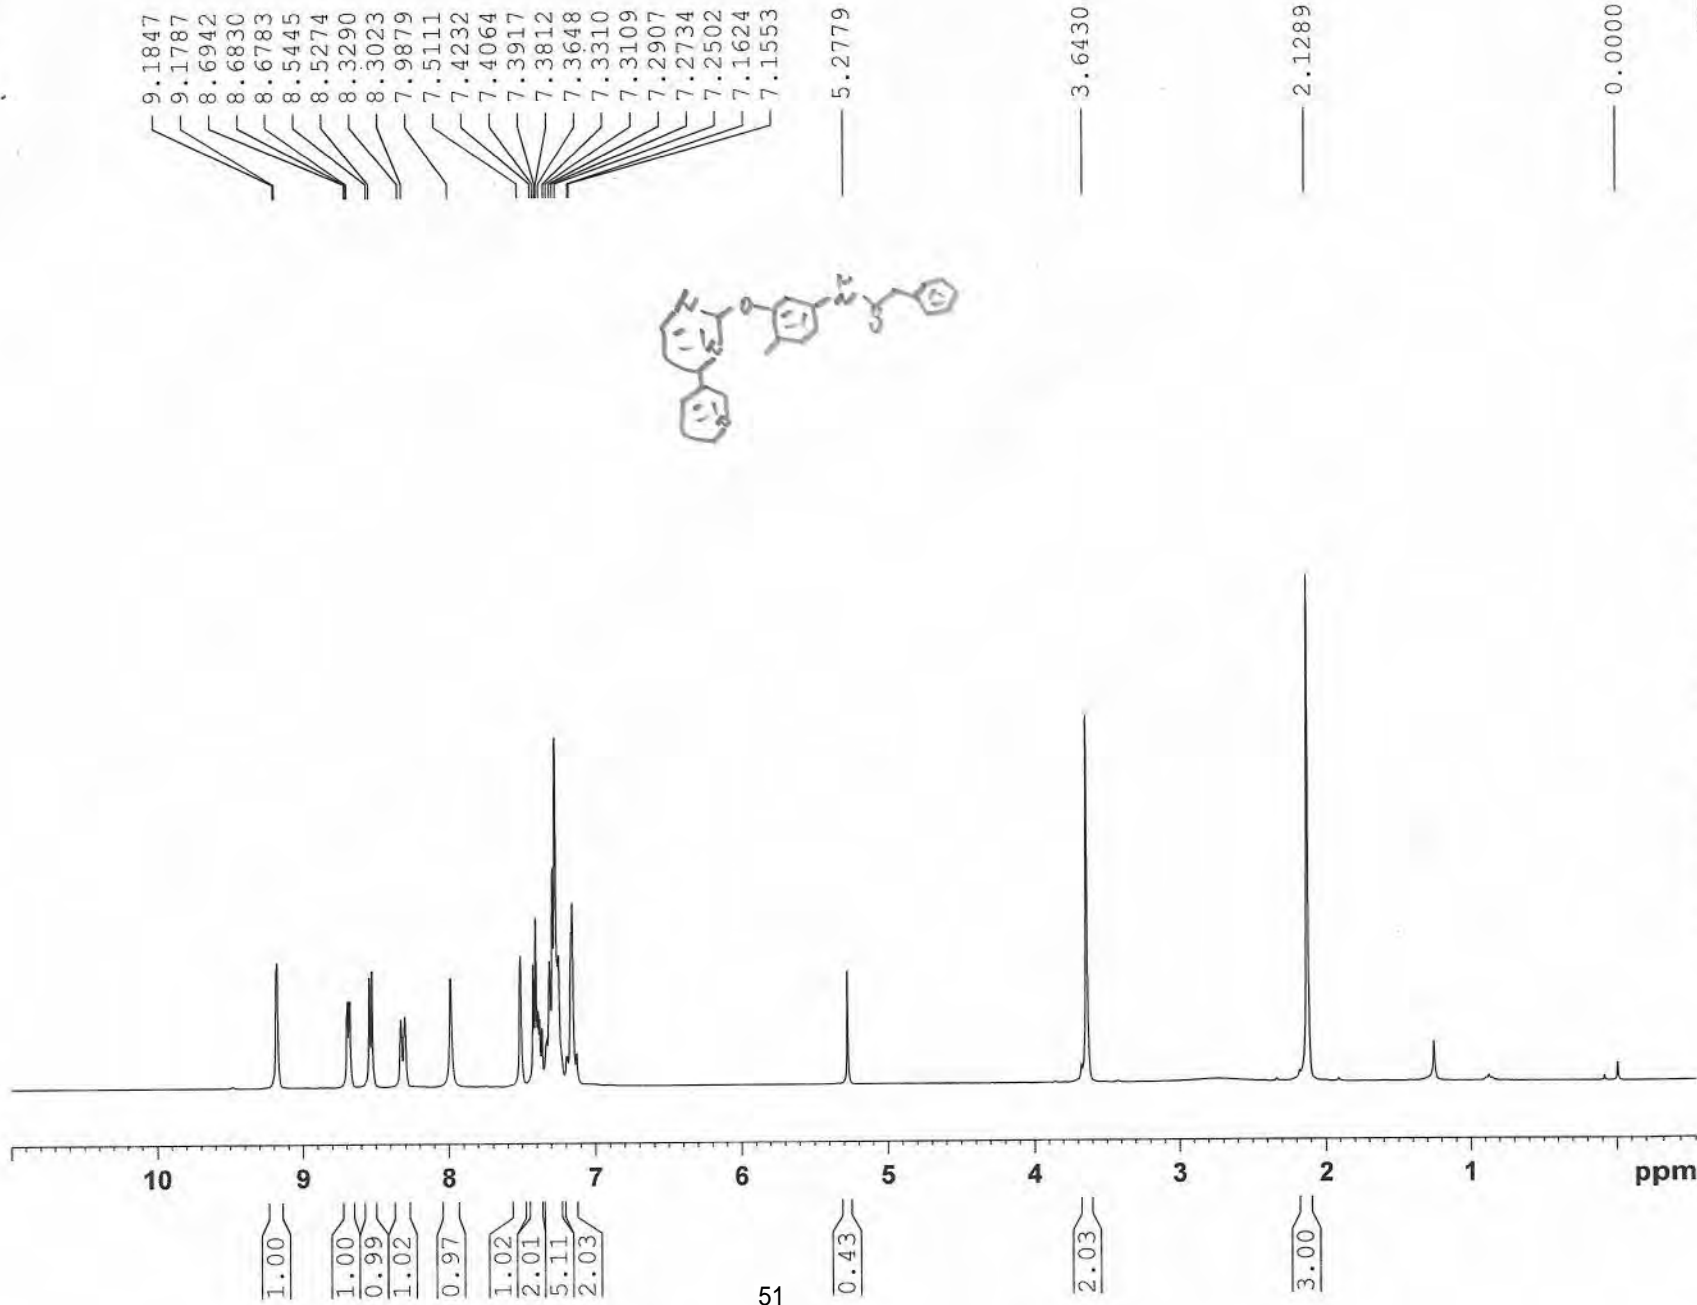

|                    |                     |                               |         |                        |                      |
|--------------------|---------------------|-------------------------------|---------|------------------------|----------------------|
| <b>Sample Name</b> |                     | <b>Position</b>               | p2d7    | <b>Instrument Name</b> | Instrument 1         |
| <b>User Name</b>   | QTOF-PC\QTOF        | <b>Inj Vol</b>                | 0.2     | <b>InjPosition</b>     |                      |
| <b>Sample Type</b> | Sample              | <b>IRM Calibration Status</b> | Success | <b>Data Filename</b>   | A2-p.d               |
| <b>ACQ Method</b>  | 20110418-MSonly-p.m | <b>Comment</b>                |         | <b>Acquired Time</b>   | 3/12/2018 2:52:45 PM |

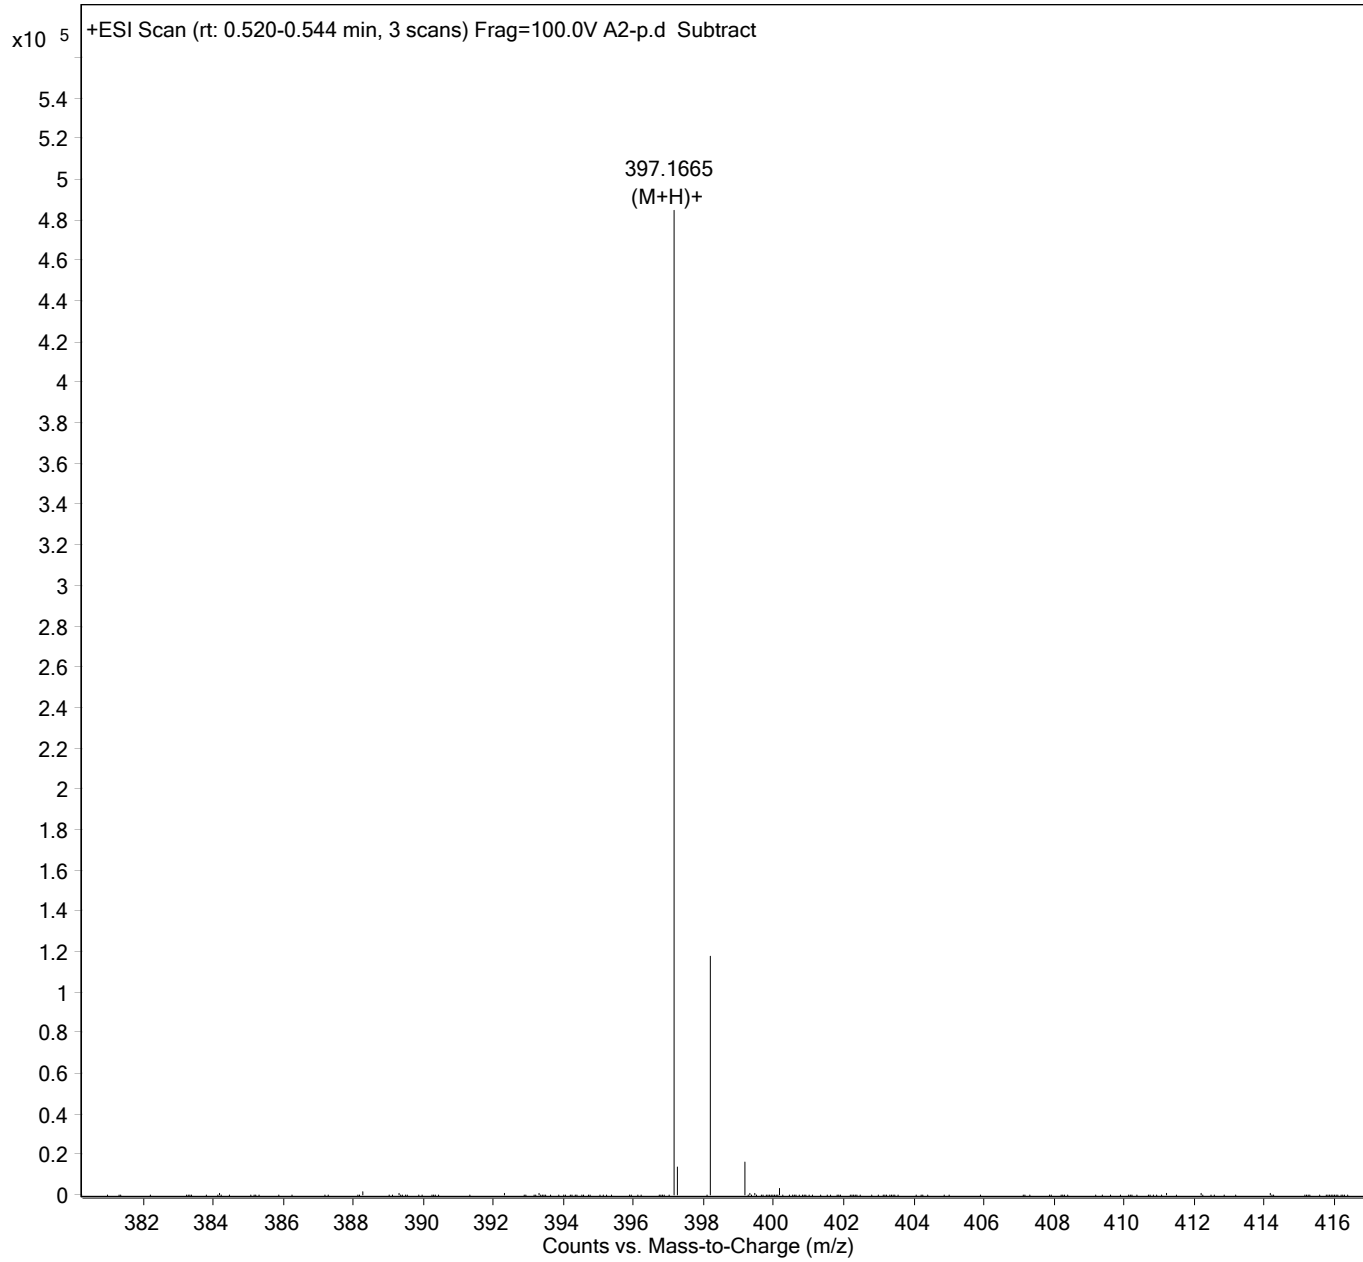

A 3

SP121128-2 CDCl<sub>3</sub> 303K C13-NMR AV300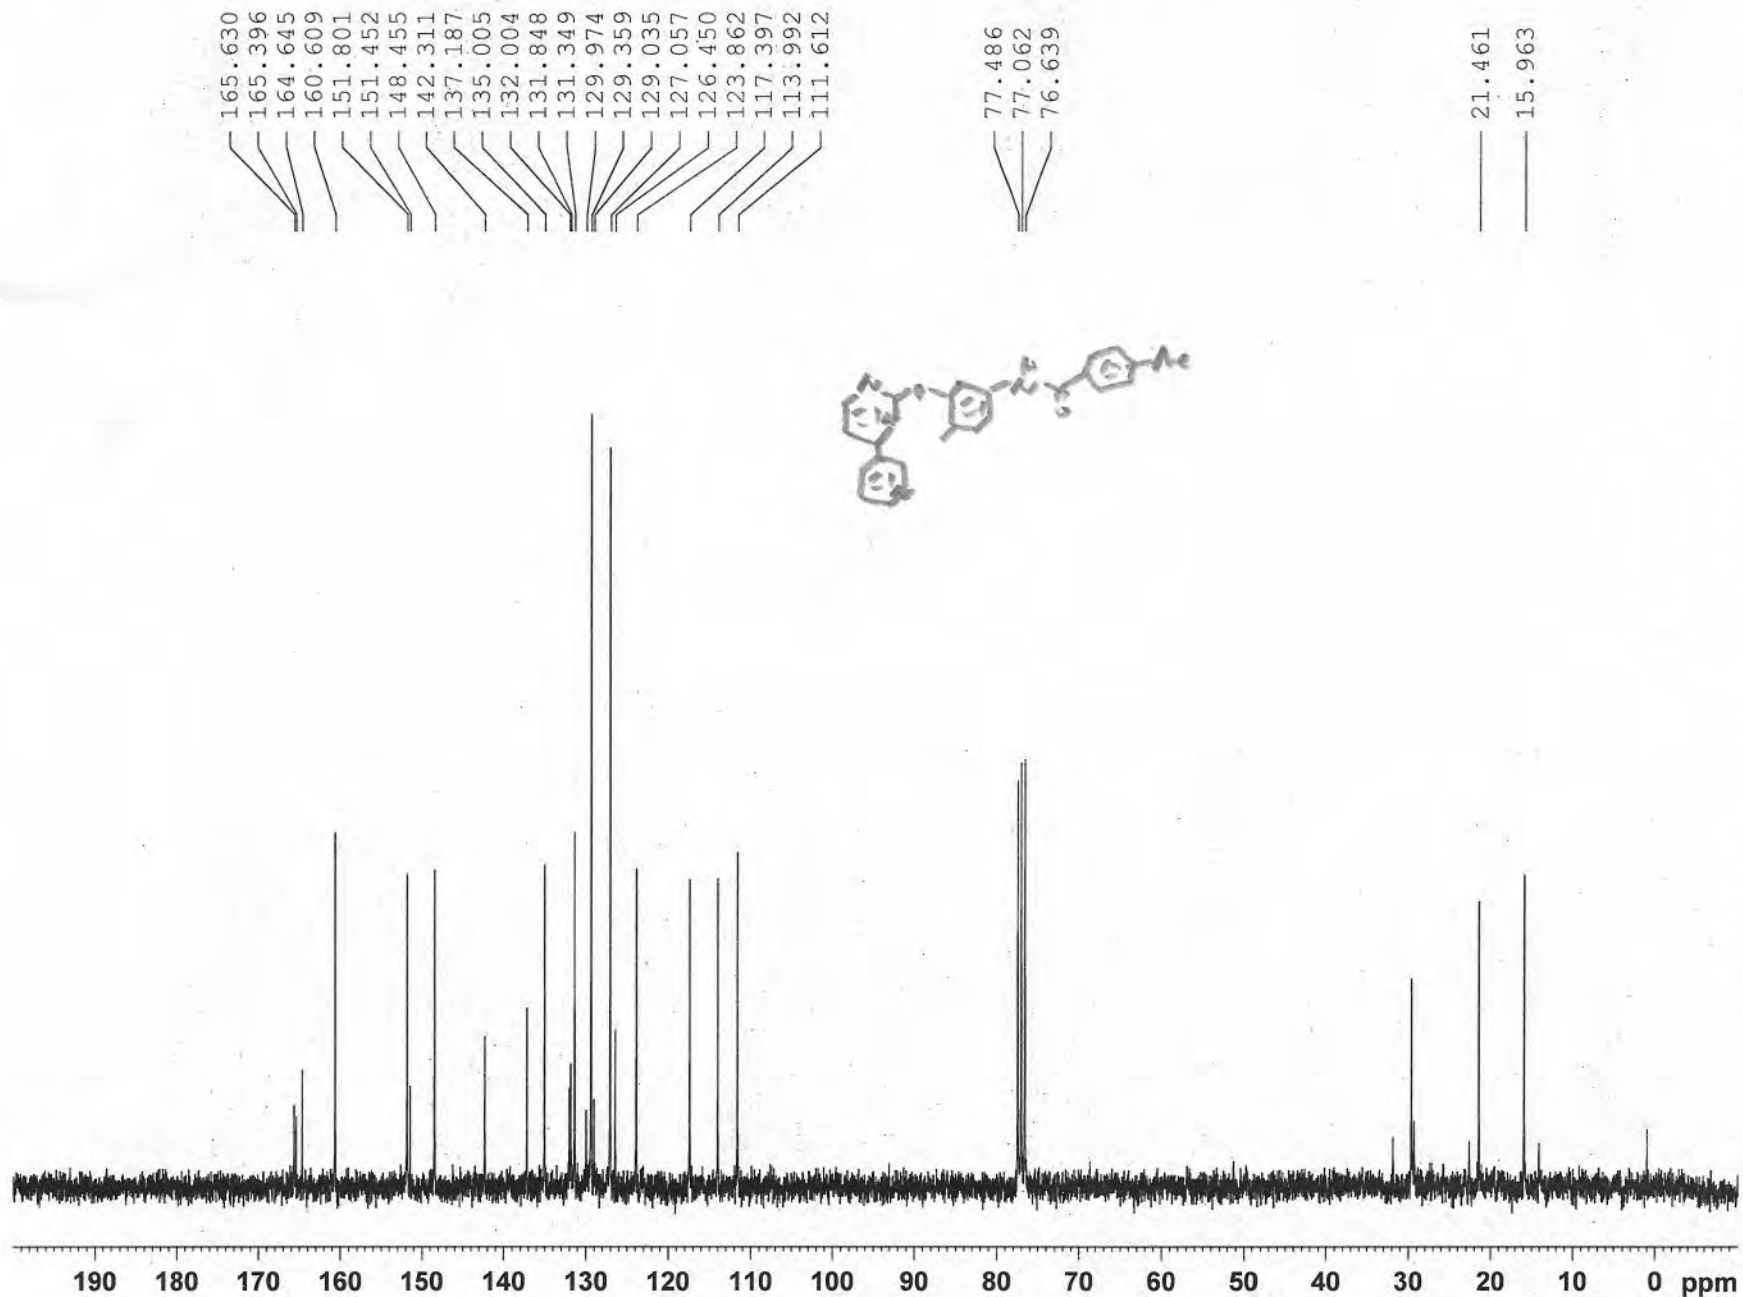

A3

SP121107-1 1H-NMR CDCI3 303K AV-300

9.2008  
8.7036  
8.6923  
8.6878  
8.5848  
8.5676  
8.3669  
8.3610  
8.3463  
8.3403  
8.3346  
8.2642  
7.9941  
7.9672  
7.7346  
7.7077  
7.6671  
7.4505  
7.4331  
7.4247  
7.4159  
7.4114  
7.3965  
7.3887  
7.2755  
7.2440  
7.2117  
7.1844

2.3636  
2.1725

0.0000

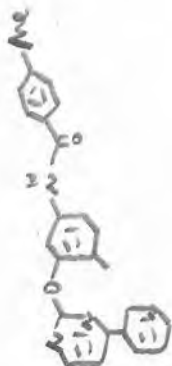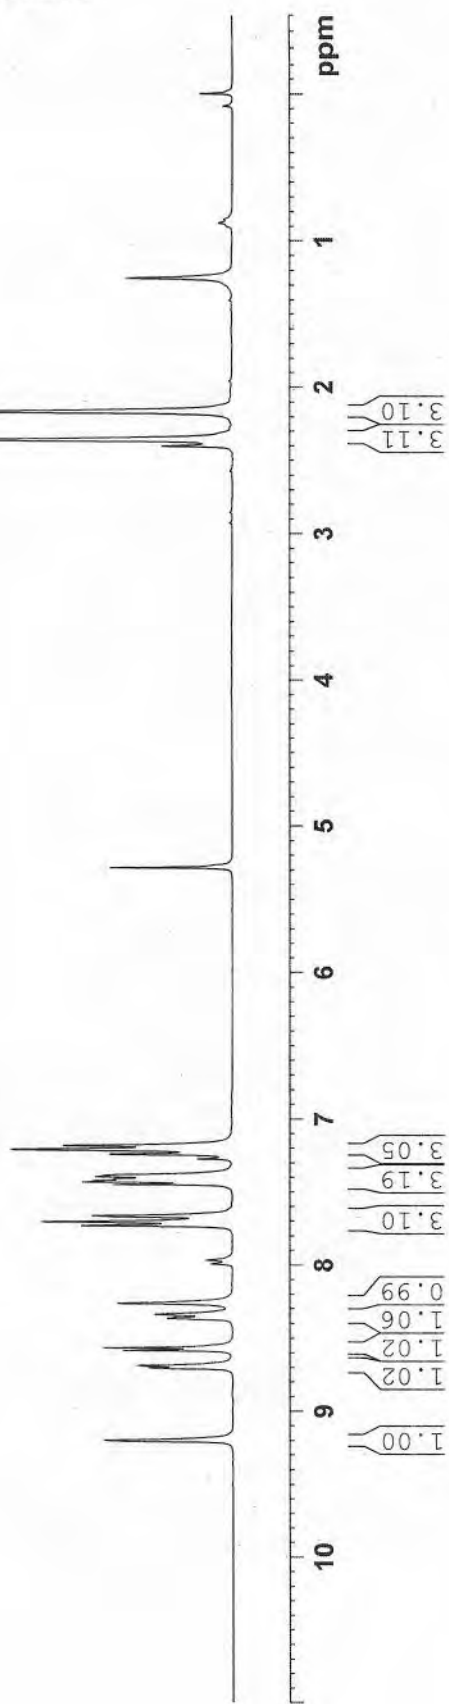

|                    |                     |                               |         |                        |                      |
|--------------------|---------------------|-------------------------------|---------|------------------------|----------------------|
| <b>Sample Name</b> |                     | <b>Position</b>               | p2d8    | <b>Instrument Name</b> | Instrument 1         |
| <b>User Name</b>   | QTOF-PC\QTOF        | <b>Inj Vol</b>                | 0.1     | <b>InjPosition</b>     |                      |
| <b>Sample Type</b> | Sample              | <b>IRM Calibration Status</b> | Success | <b>Data Filename</b>   | A3-p.d               |
| <b>ACQ Method</b>  | 20110418-MSonly-p.m | <b>Comment</b>                |         | <b>Acquired Time</b>   | 3/12/2018 2:54:56 PM |

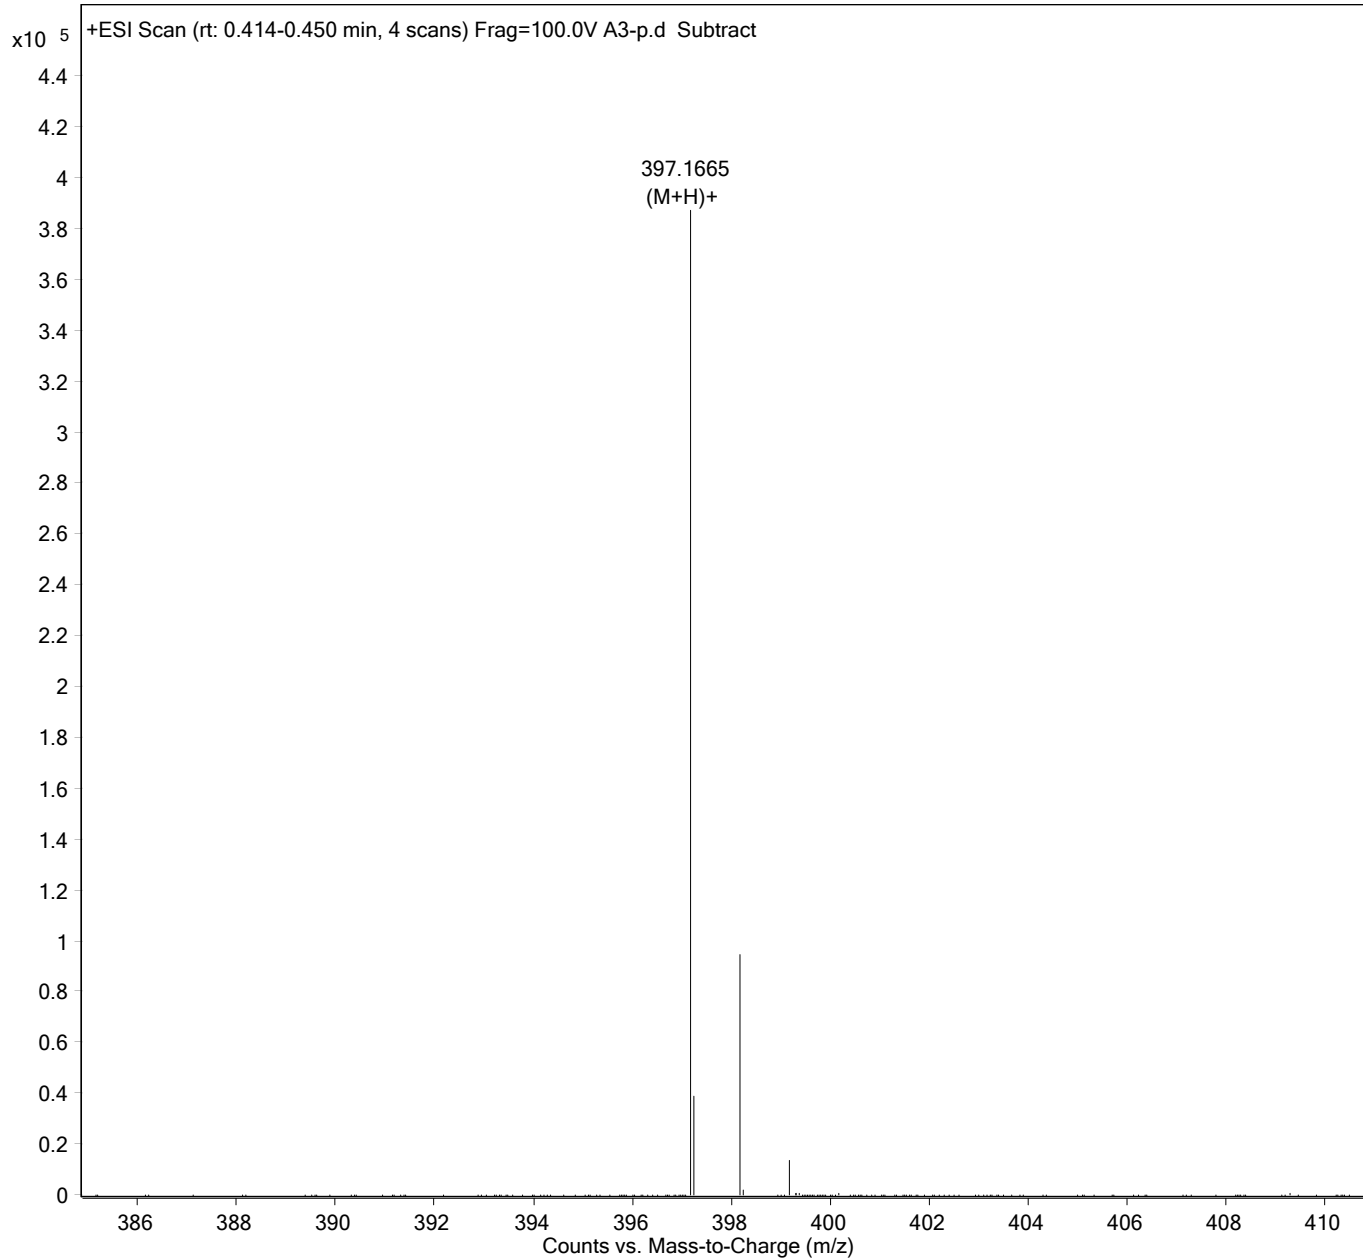

A 4

SP121212-1 CDCl<sub>3</sub> 303K C13-NMR AV300

166.198  
165.319  
164.541  
160.557  
151.725  
151.358  
148.395  
138.380  
137.370  
134.968  
134.857  
132.398  
131.780  
131.270  
128.411  
127.881  
126.324  
124.152  
123.852  
117.564  
114.093  
111.637

77.610  
77.187  
76.760

21.273  
15.944

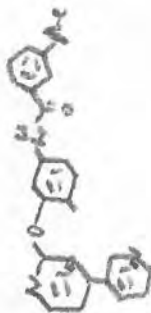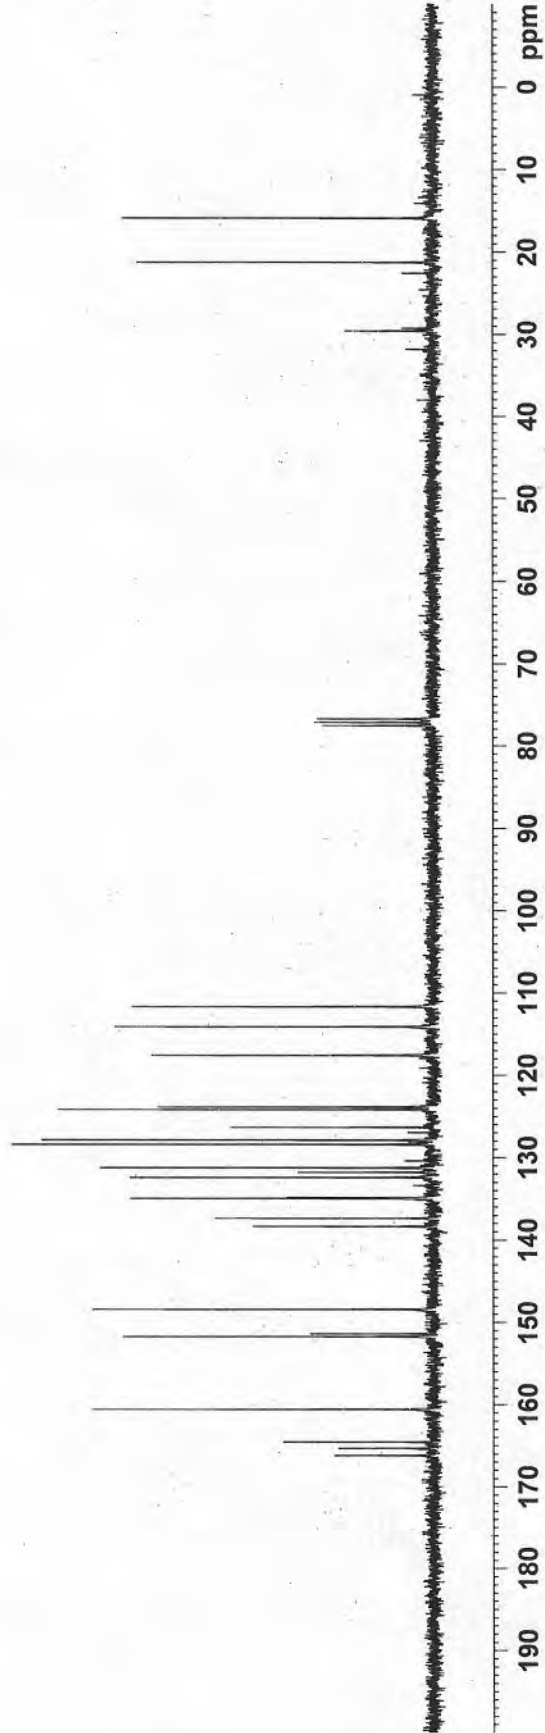



A4

SP121212-1 1H-NMR CDC13 303K AV-300

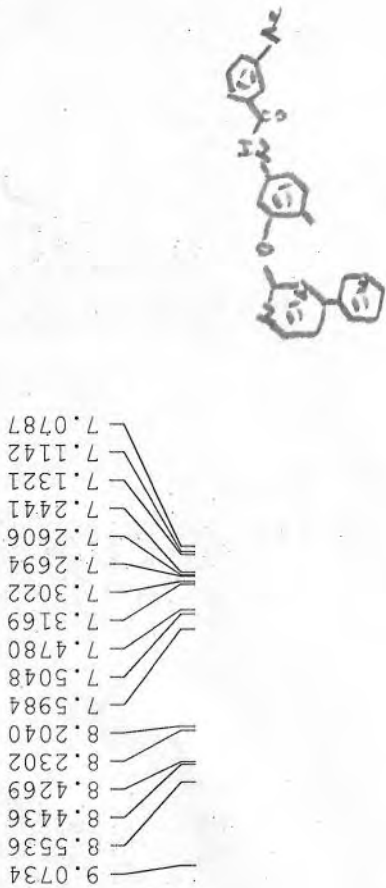

9.0734  
8.5536  
8.4436  
8.4269  
8.2302  
8.2040  
7.5984  
7.5048  
7.4780  
7.3169  
7.3022  
7.2694  
7.2606  
7.2441  
7.1321  
7.1142  
7.0787

2.1854  
2.0458

0.0000

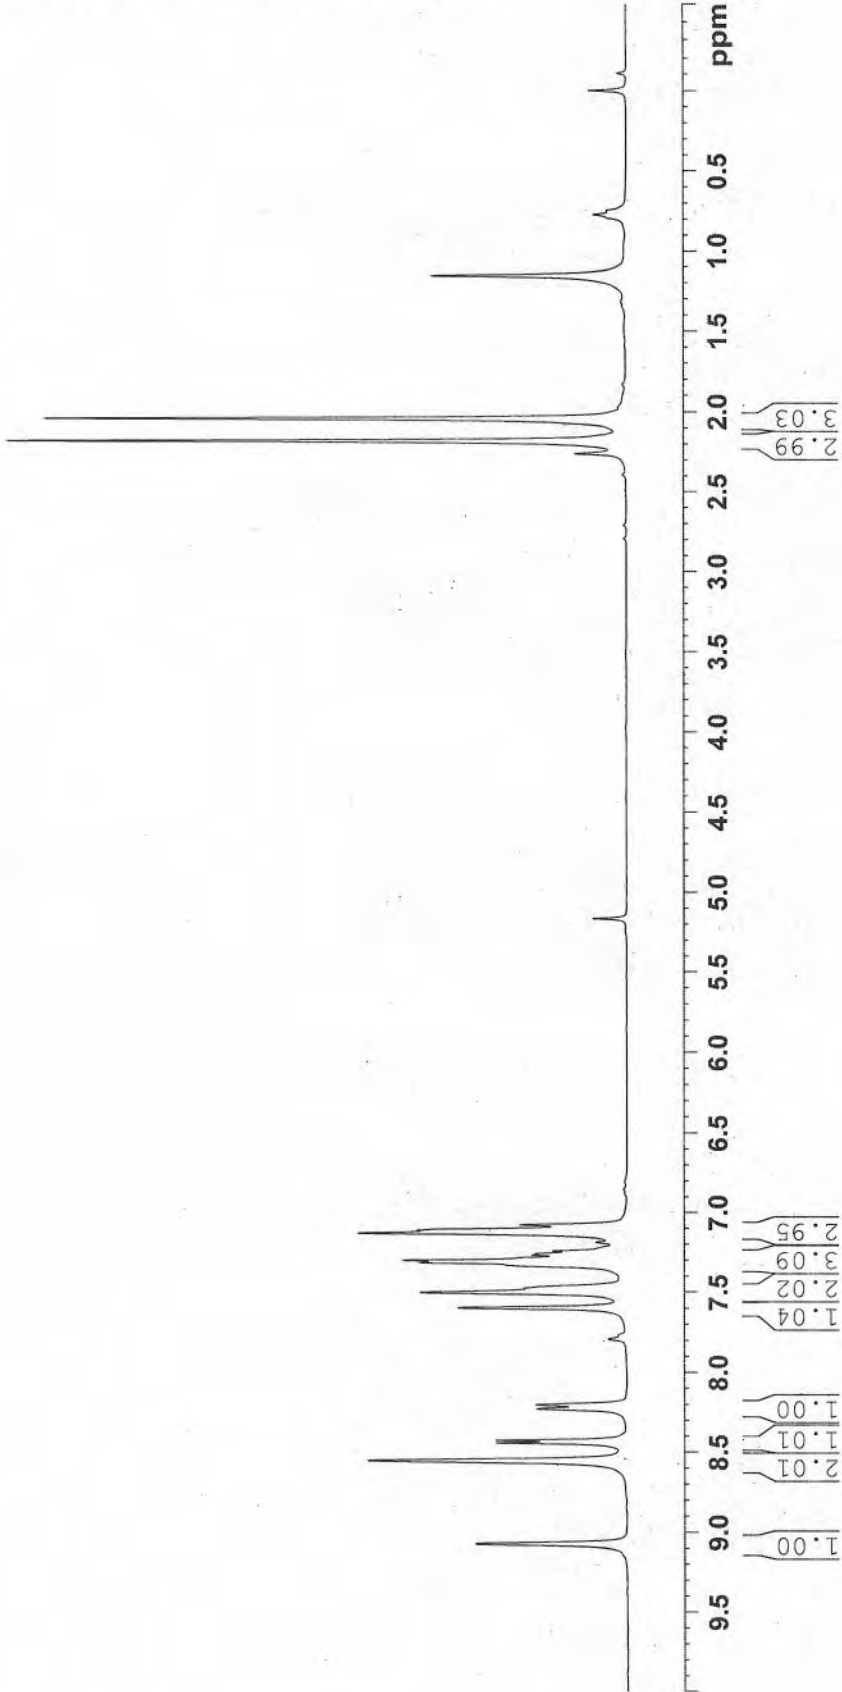

|                    |                     |                               |         |                        |                      |
|--------------------|---------------------|-------------------------------|---------|------------------------|----------------------|
| <b>Sample Name</b> |                     | <b>Position</b>               | p2d9    | <b>Instrument Name</b> | Instrument 1         |
| <b>User Name</b>   | QTOF-PC\QTOF        | <b>Inj Vol</b>                | 0.1     | <b>InjPosition</b>     |                      |
| <b>Sample Type</b> | Sample              | <b>IRM Calibration Status</b> | Success | <b>Data Filename</b>   | A4-p.d               |
| <b>ACQ Method</b>  | 20110418-MSonly-p.m | <b>Comment</b>                |         | <b>Acquired Time</b>   | 3/12/2018 2:57:46 PM |

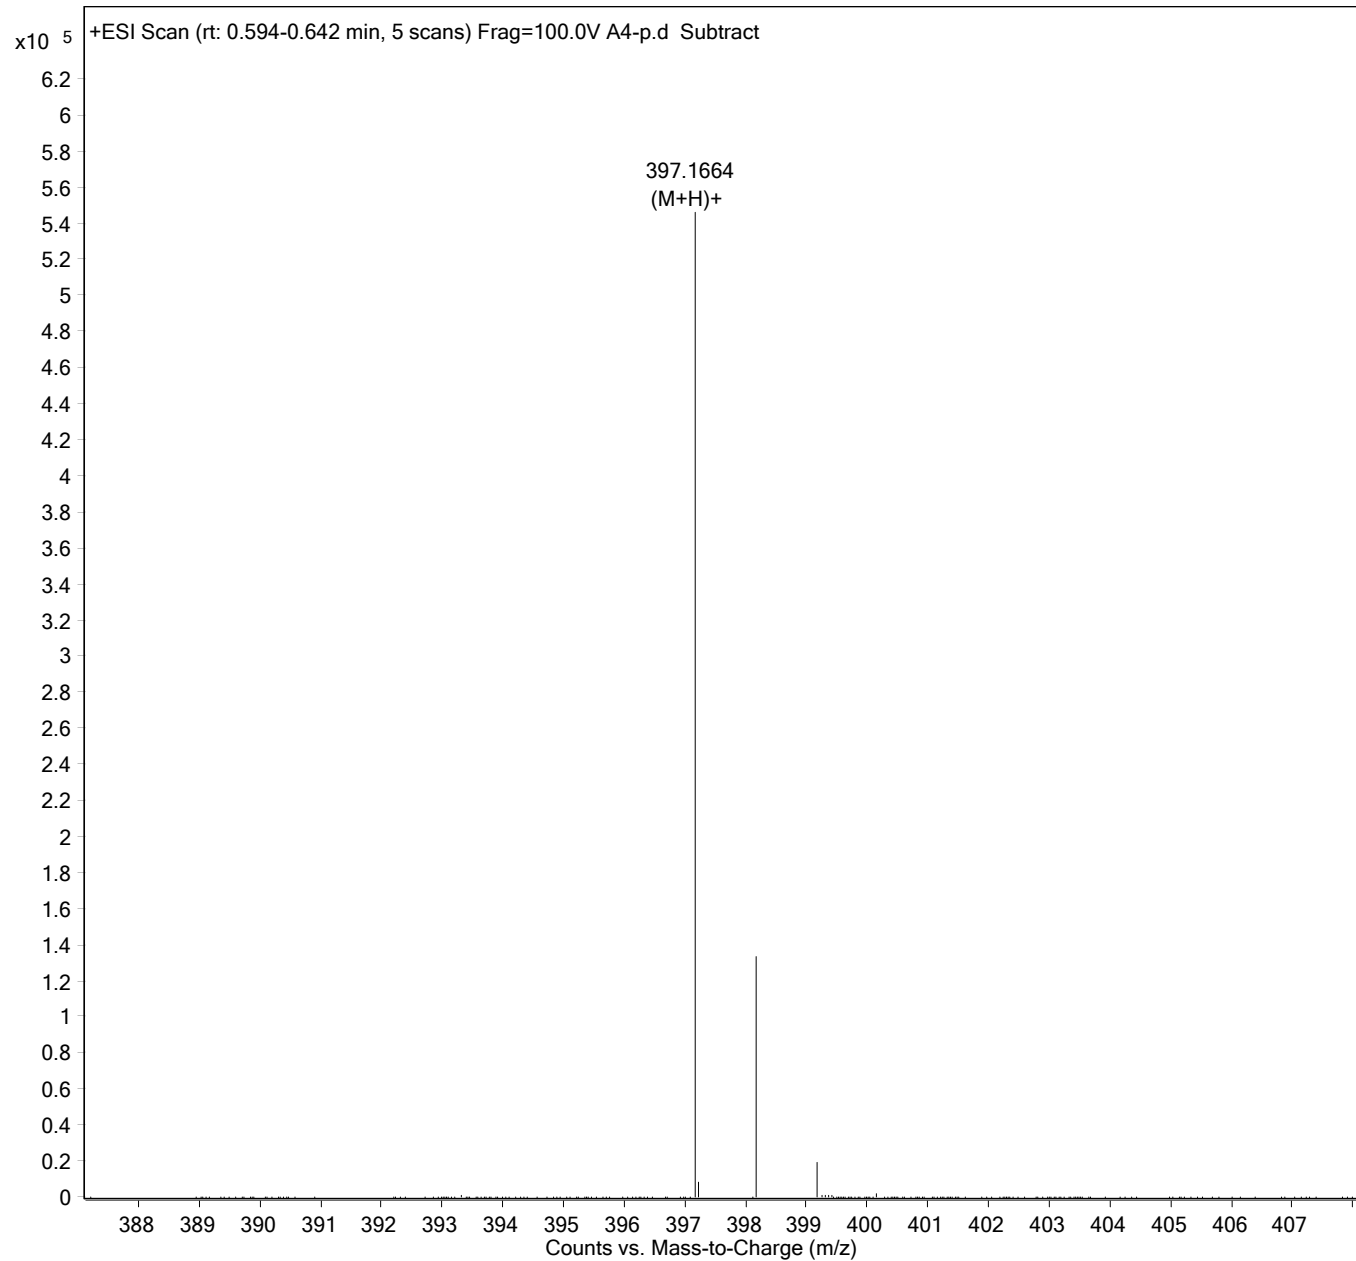

AS

SP121119 CDCl3 303K C13-NMR AV300

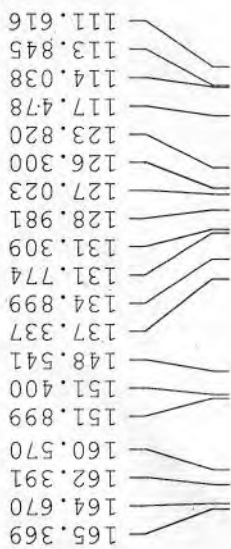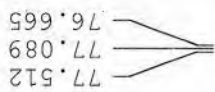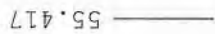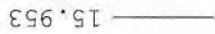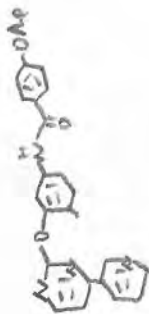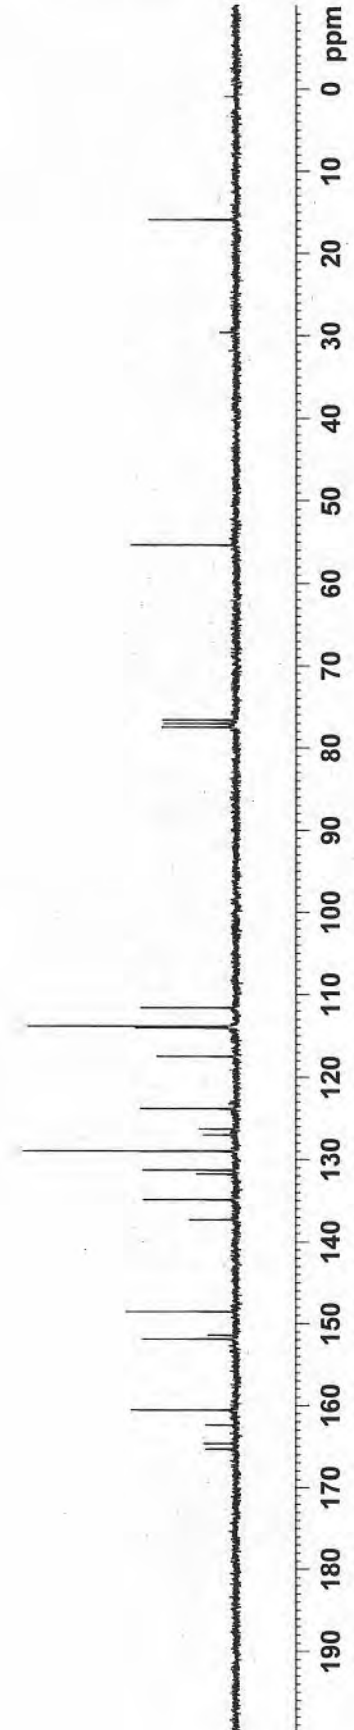

AS

SP121105-2 1H-NMR CDCI3 303K AV-300

0.0000  
-0.0861

2.0803

3.7187

5.2041

6.7691

6.7984

6.8077

7.1180

7.1456

7.2897

7.2971

7.3038

7.3152

7.3312

7.3396

7.3570

7.5818

7.5880

7.6918

7.7210

8.2406

8.2614

8.2676

8.4700

8.4872

8.5999

8.6119

9.1096

9.1142

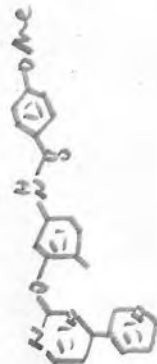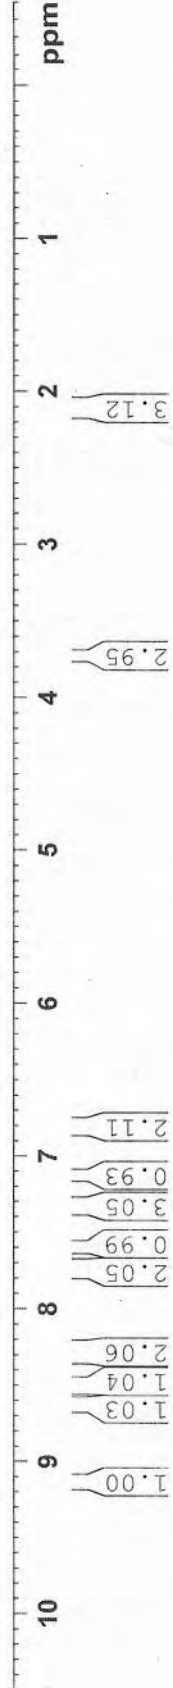

|                    |                     |                               |         |                        |                      |
|--------------------|---------------------|-------------------------------|---------|------------------------|----------------------|
| <b>Sample Name</b> |                     | <b>Position</b>               | p2E1    | <b>Instrument Name</b> | Instrument 1         |
| <b>User Name</b>   | QTOF-PC\QTOF        | <b>Inj Vol</b>                | 0.1     | <b>InjPosition</b>     |                      |
| <b>Sample Type</b> | Sample              | <b>IRM Calibration Status</b> | Success | <b>Data Filename</b>   | A5-p.d               |
| <b>ACQ Method</b>  | 20110418-MSonly-p.m | <b>Comment</b>                |         | <b>Acquired Time</b>   | 3/12/2018 3:00:14 PM |

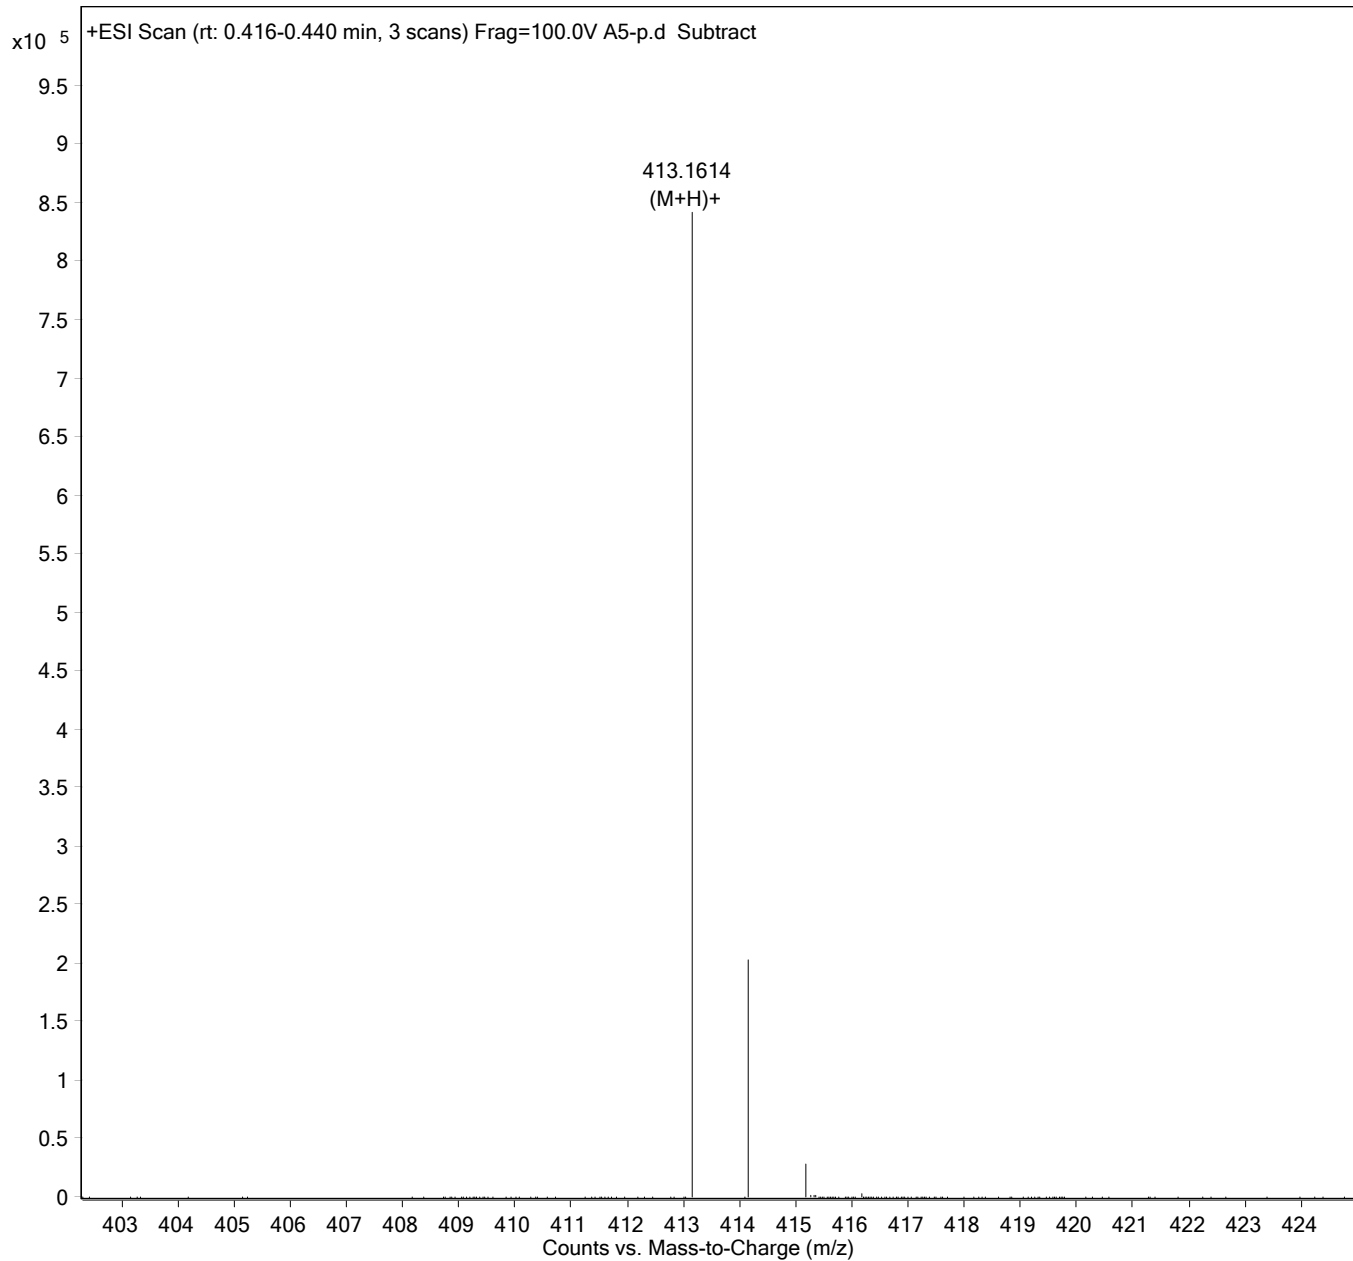

A6.

SP121205-1 CDCl<sub>3</sub> 303K C13-NMR AV300

- 165.303
- 164.903
- 164.657
- 160.566
- 151.890
- 151.389
- 148.524
- 137.947
- 136.952
- 134.880
- 133.221
- 131.727
- 131.388
- 128.833
- 128.604
- 126.805
- 123.836
- 117.641
- 114.222
- 111.672

- 77.516
- 77.093
- 76.670

- 15.981

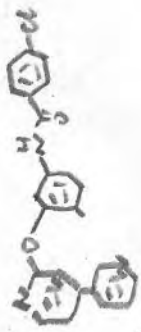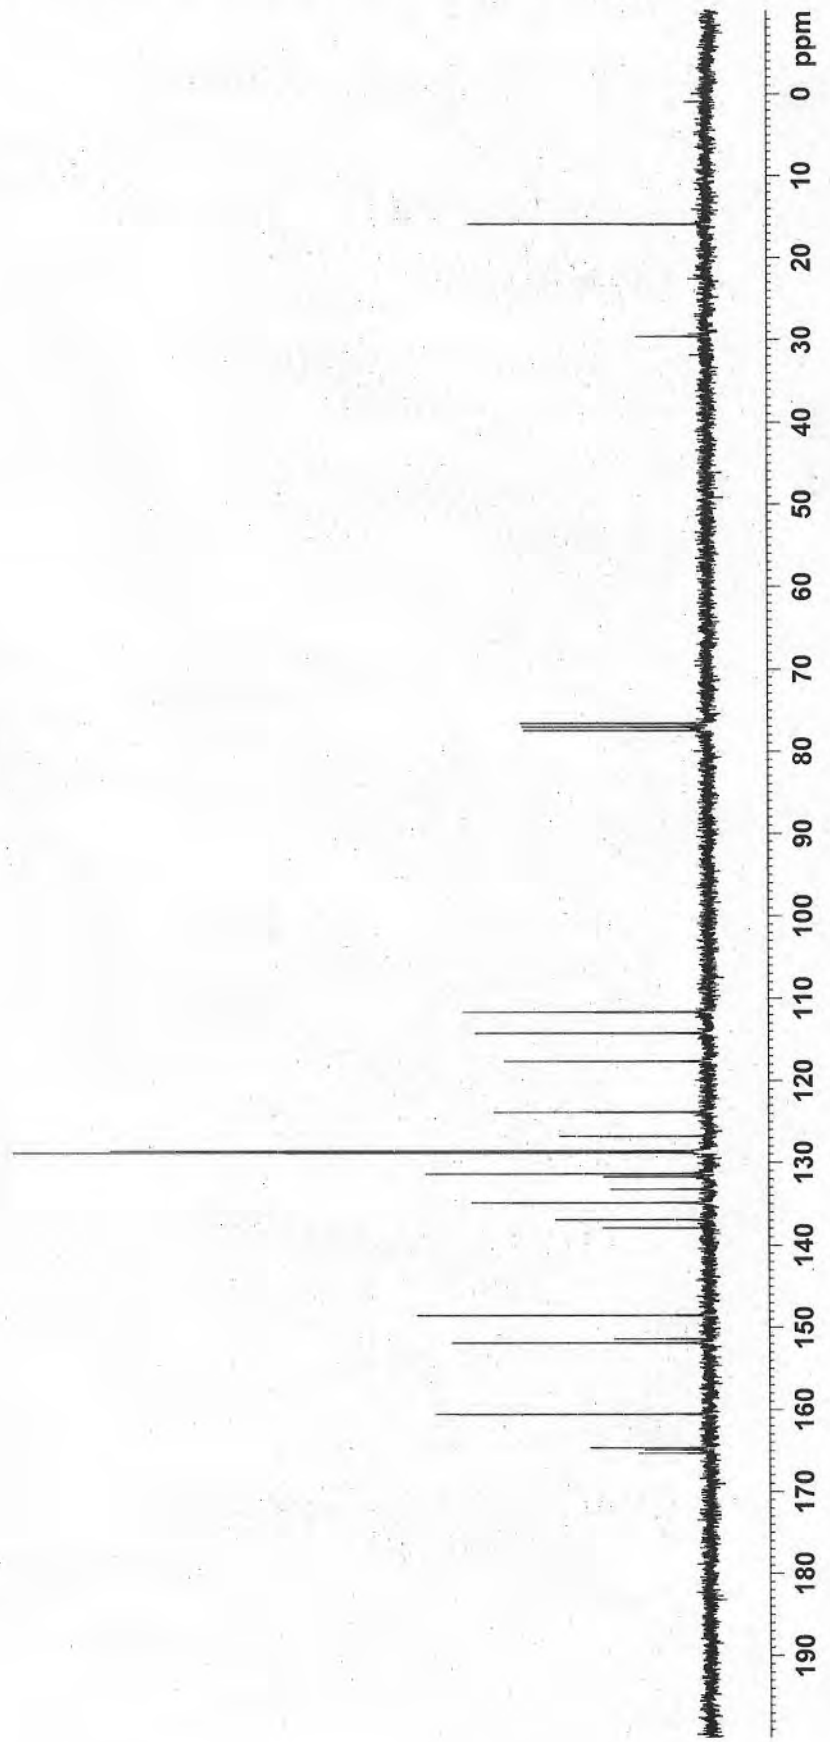

A6

SP121114-3 1HNMR CDC13 303K AV-300

9.1739  
8.7441  
8.6758  
8.6614  
8.5559  
8.5389  
8.3303  
8.3037  
7.7440  
7.7161  
7.6570  
7.4341  
7.4164  
7.4066  
7.3796  
7.3645  
7.3113  
7.2837  
7.2134  
7.1858

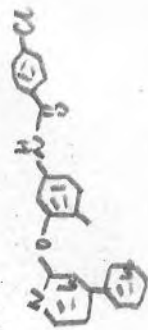

2.1535

0.0000

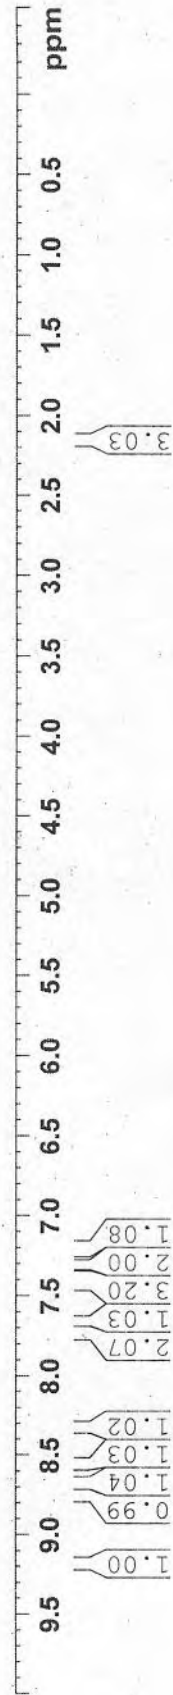

|                    |                     |                               |         |                        |                      |
|--------------------|---------------------|-------------------------------|---------|------------------------|----------------------|
| <b>Sample Name</b> |                     | <b>Position</b>               | p2E2    | <b>Instrument Name</b> | Instrument 1         |
| <b>User Name</b>   | QTOF-PC\QTOF        | <b>Inj Vol</b>                | 0.1     | <b>InjPosition</b>     |                      |
| <b>Sample Type</b> | Sample              | <b>IRM Calibration Status</b> | Success | <b>Data Filename</b>   | A6-p.d               |
| <b>ACQ Method</b>  | 20110418-MSonly-p.m | <b>Comment</b>                |         | <b>Acquired Time</b>   | 3/12/2018 3:02:19 PM |

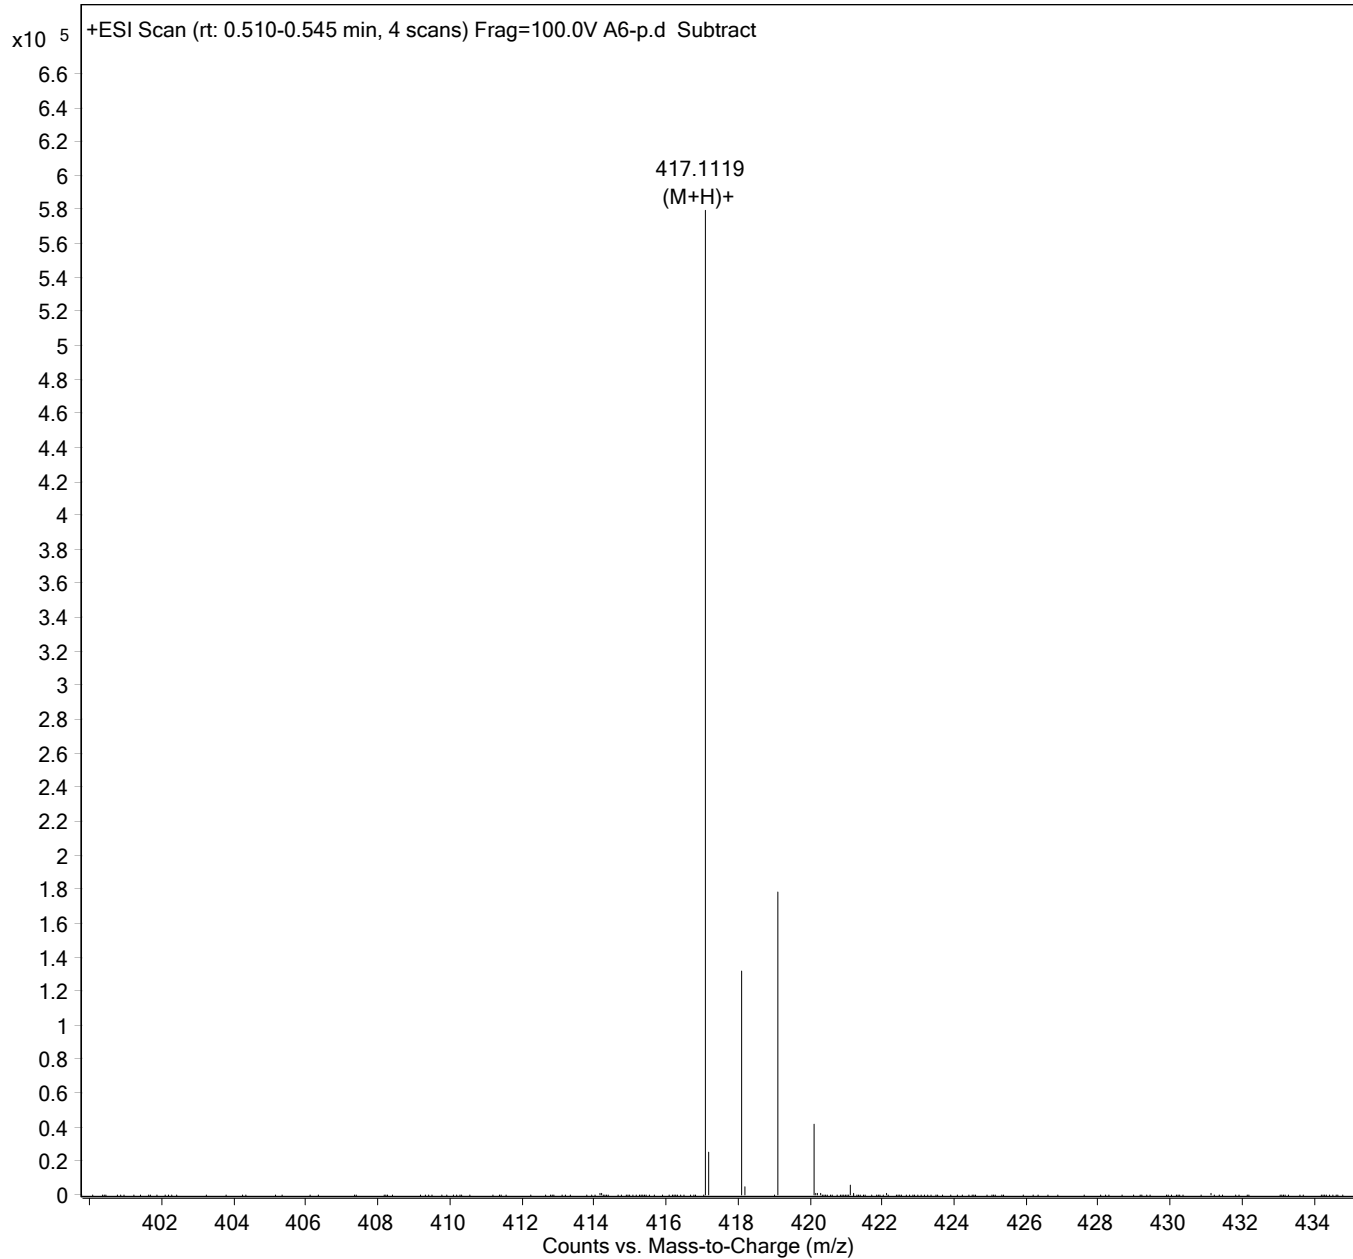



A7

SP121202-1 CDC13 303K C13-NMR AV300

|         |       |
|---------|-------|
| 165.327 | _____ |
| 164.710 | _____ |
| 164.437 | _____ |
| 160.588 | _____ |
| 151.962 | _____ |
| 151.422 | _____ |
| 148.571 | _____ |
| 136.793 | _____ |
| 136.679 | _____ |
| 134.864 | _____ |
| 134.807 | _____ |
| 131.753 | _____ |
| 131.430 | _____ |
| 129.998 | _____ |
| 127.422 | _____ |
| 126.945 | _____ |
| 125.221 | _____ |
| 123.824 | _____ |
| 117.560 | _____ |
| 114.170 | _____ |
| 111.667 | _____ |
| 77.483  | _____ |
| 77.060  | _____ |
| 76.636  | _____ |
| 29.696  | _____ |
| 15.991  | _____ |

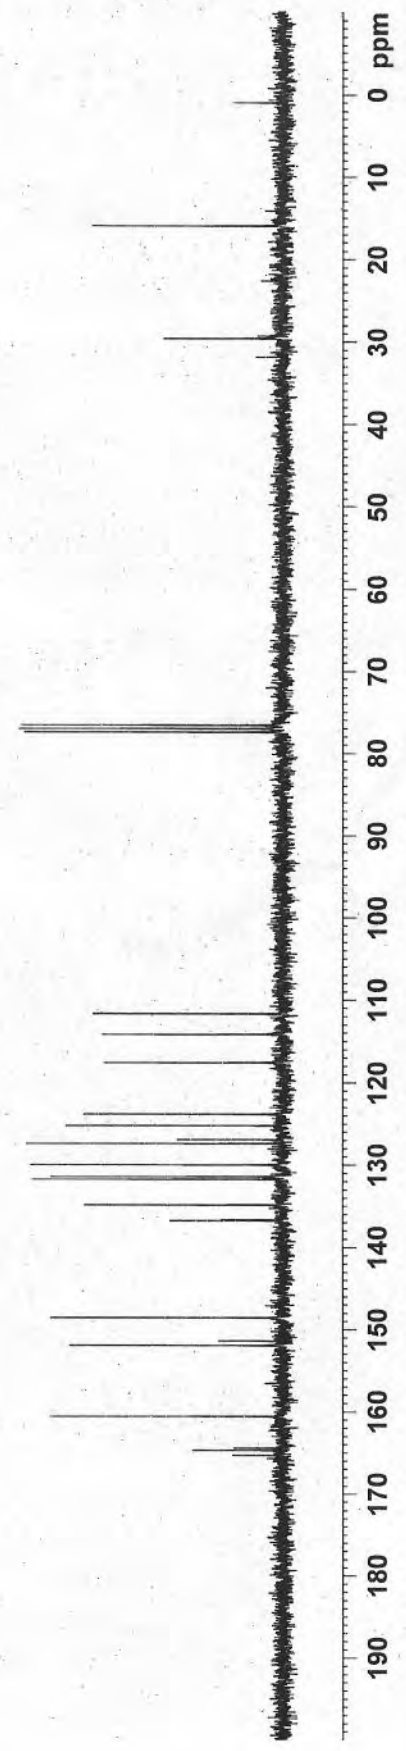

A7

SP121114-2 1HNMR CDC13 303K AV-300

- 9.1702
- 8.7983
- 8.6735
- 8.6583
- 8.5630
- 8.5460
- 8.3328
- 8.3064
- 7.7755
- 7.6853
- 7.6591
- 7.4398
- 7.4221
- 7.4080
- 7.3873
- 7.3645
- 7.3083
- 7.2825
- 7.2150
- 7.1875

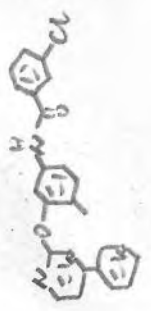

- 2.1454
- 0.0003

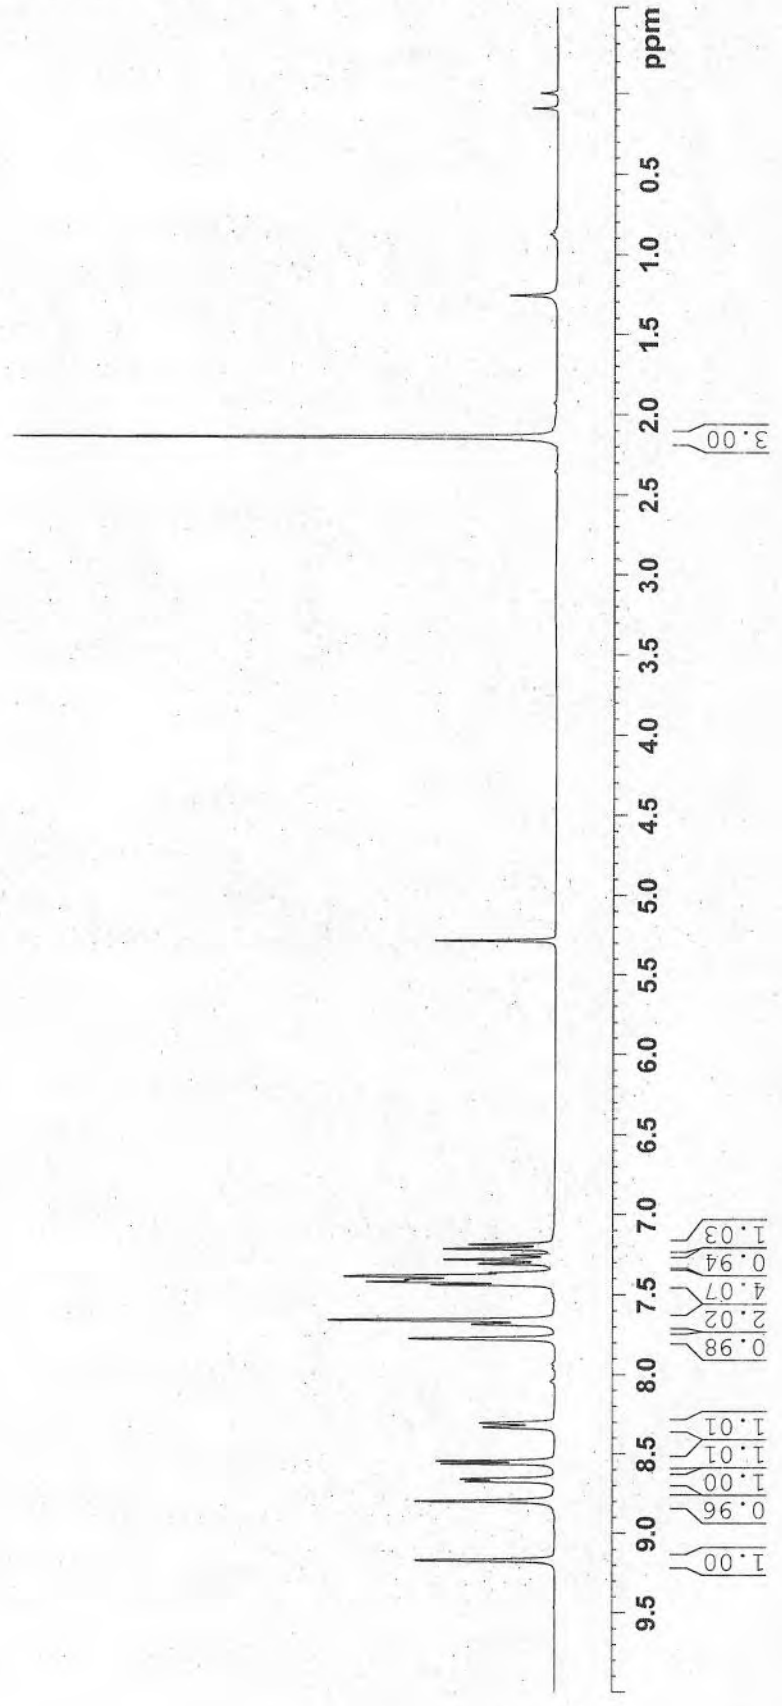

|                    |                     |                               |         |                        |                      |
|--------------------|---------------------|-------------------------------|---------|------------------------|----------------------|
| <b>Sample Name</b> |                     | <b>Position</b>               | p2E3    | <b>Instrument Name</b> | Instrument 1         |
| <b>User Name</b>   | QTOF-PC\QTOF        | <b>Inj Vol</b>                | 0.1     | <b>InjPosition</b>     |                      |
| <b>Sample Type</b> | Sample              | <b>IRM Calibration Status</b> | Success | <b>Data Filename</b>   | A7-p.d               |
| <b>ACQ Method</b>  | 20110418-MSonly-p.m | <b>Comment</b>                |         | <b>Acquired Time</b>   | 3/12/2018 3:04:19 PM |

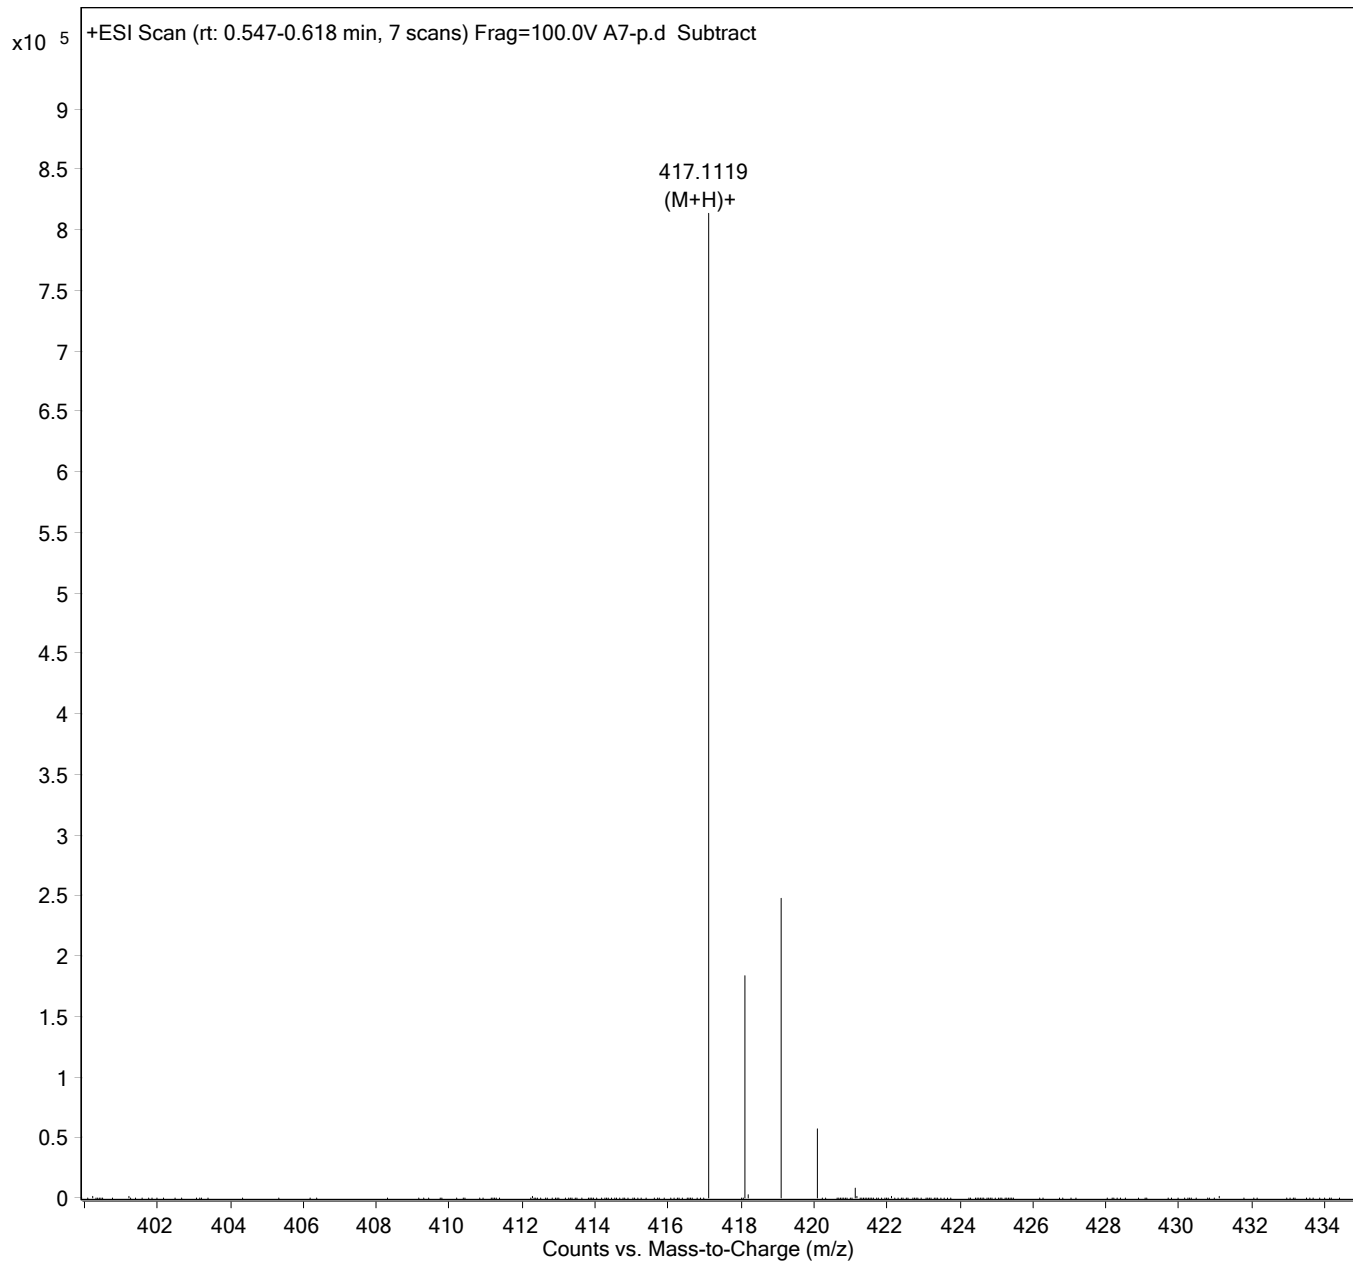

A 8

SP140310-3-C C13-NMR CDCL3 303K AV-300

165.252  
164.655  
163.828  
160.654  
151.850  
151.439  
149.606  
148.509  
140.442  
136.431  
134.910  
131.718  
131.542  
128.362  
127.514  
123.864  
117.714  
114.394  
111.743

77.468  
77.045  
76.621

16.022

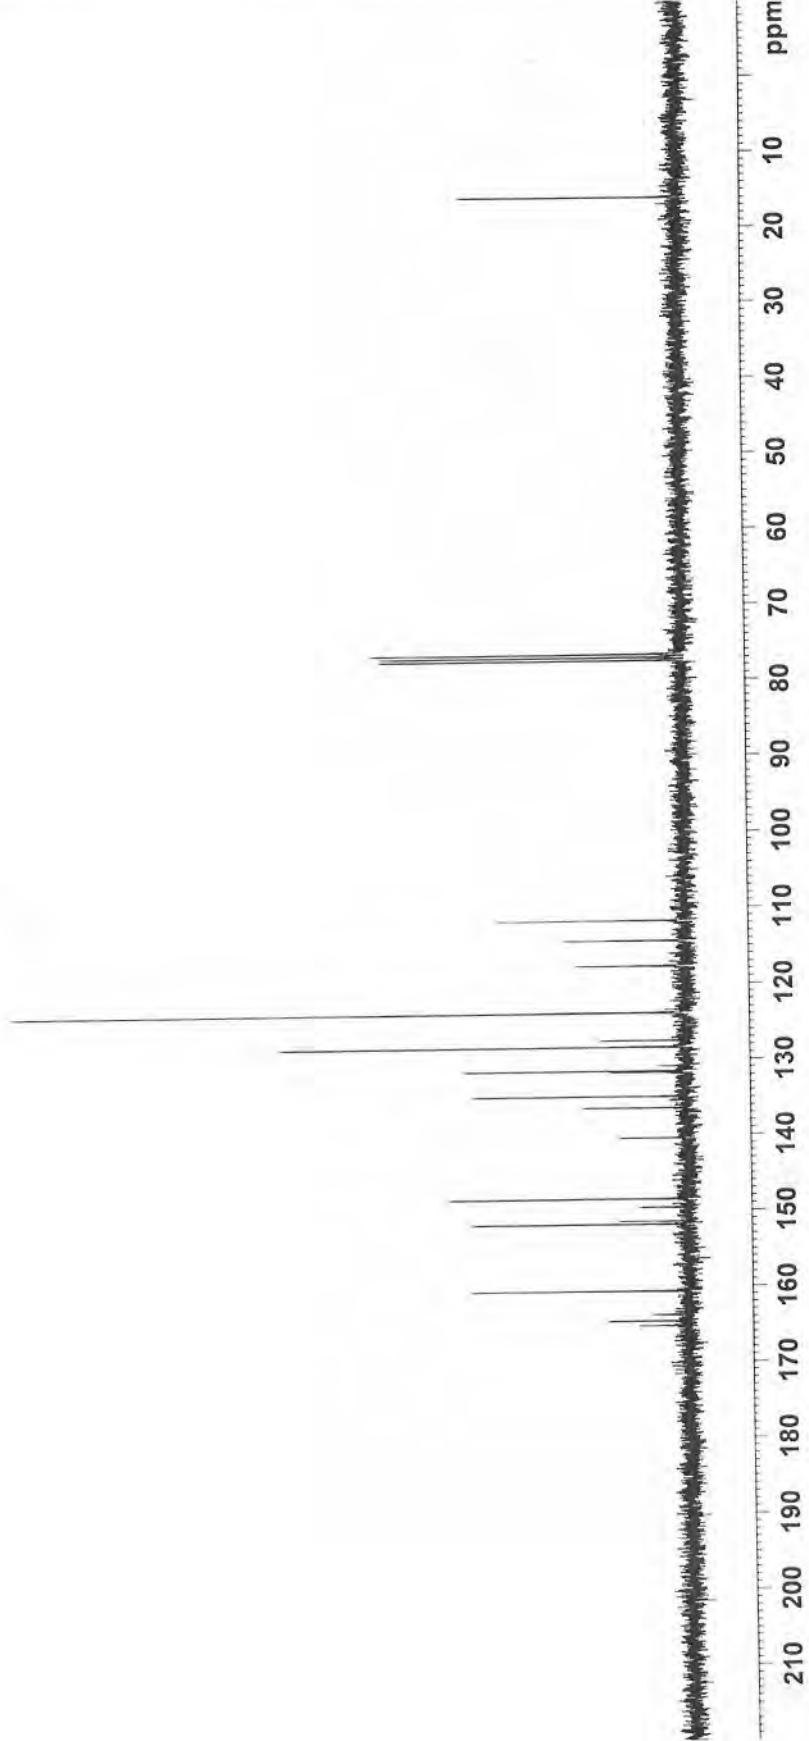

SP121109-1 1H-NMR CDC13 303K AV-300

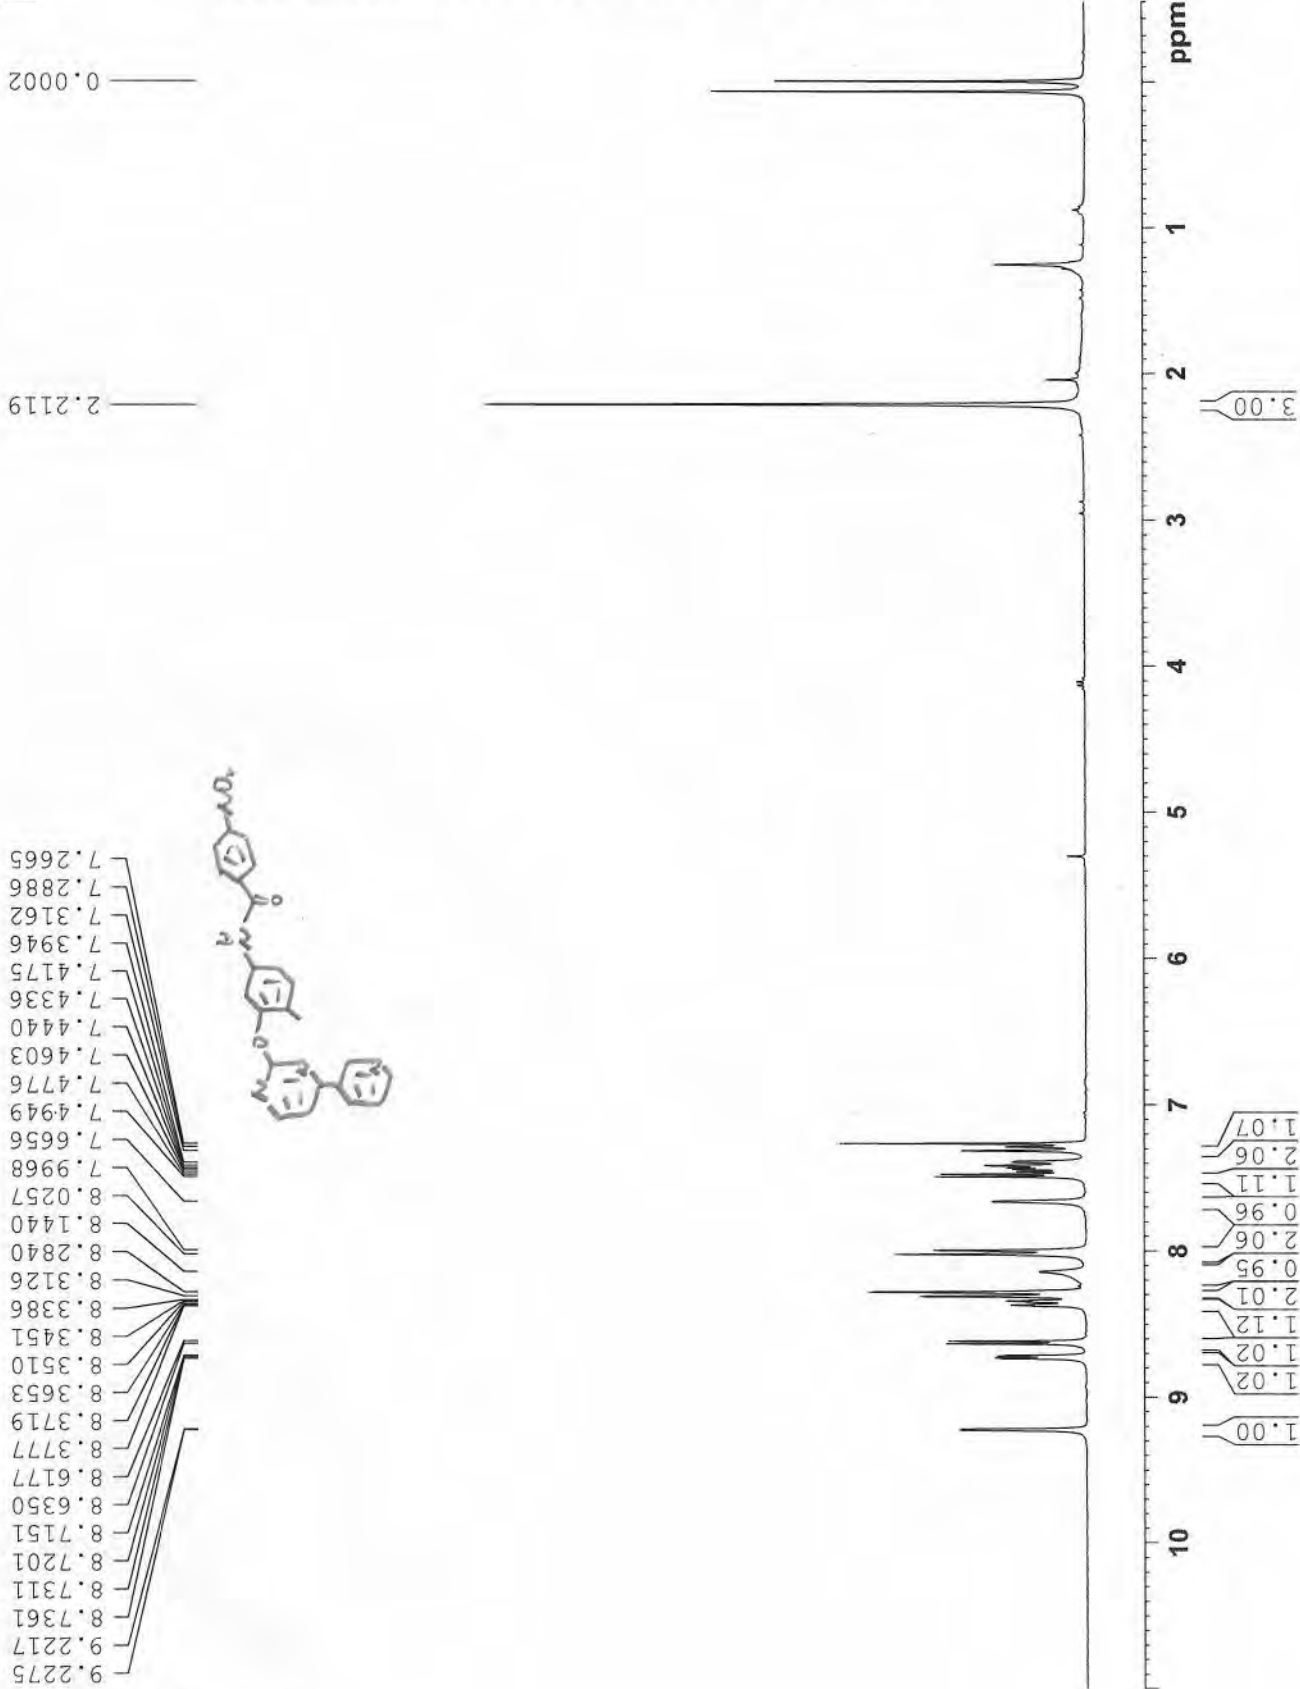

|                    |                     |                               |         |                        |                      |
|--------------------|---------------------|-------------------------------|---------|------------------------|----------------------|
| <b>Sample Name</b> |                     | <b>Position</b>               | p2E4    | <b>Instrument Name</b> | Instrument 1         |
| <b>User Name</b>   | QTOF-PC\QTOF        | <b>Inj Vol</b>                | 0.1     | <b>InjPosition</b>     |                      |
| <b>Sample Type</b> | Sample              | <b>IRM Calibration Status</b> | Success | <b>Data Filename</b>   | A8-p.d               |
| <b>ACQ Method</b>  | 20110418-MSonly-p.m | <b>Comment</b>                |         | <b>Acquired Time</b>   | 3/12/2018 3:07:26 PM |

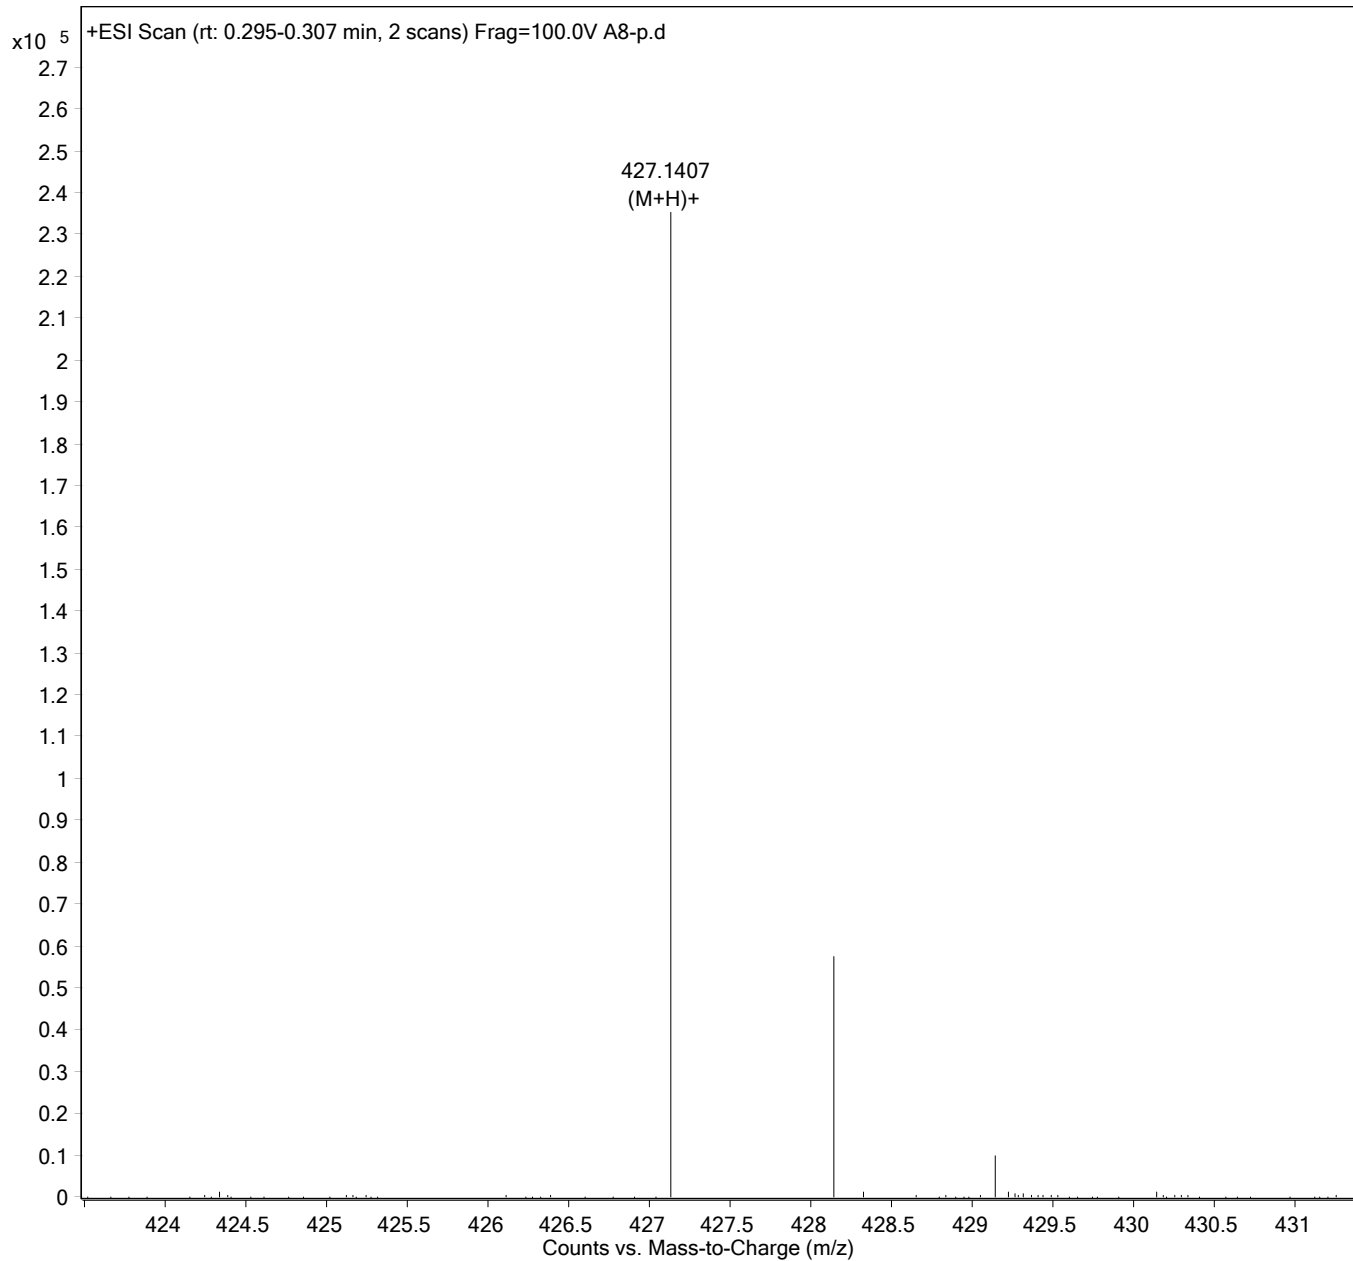

SP121121-1 CDCl3 303K C13-NMR AV300

165.233  
164.648  
163.572  
160.590  
151.891  
151.352  
148.516  
147.999  
136.653  
136.445  
134.870  
133.614  
131.702  
131.439  
129.884  
127.236  
126.176  
123.867  
122.022  
117.887  
114.466  
111.738

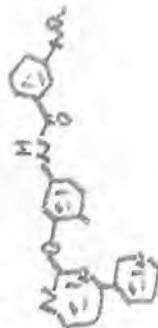

15.959

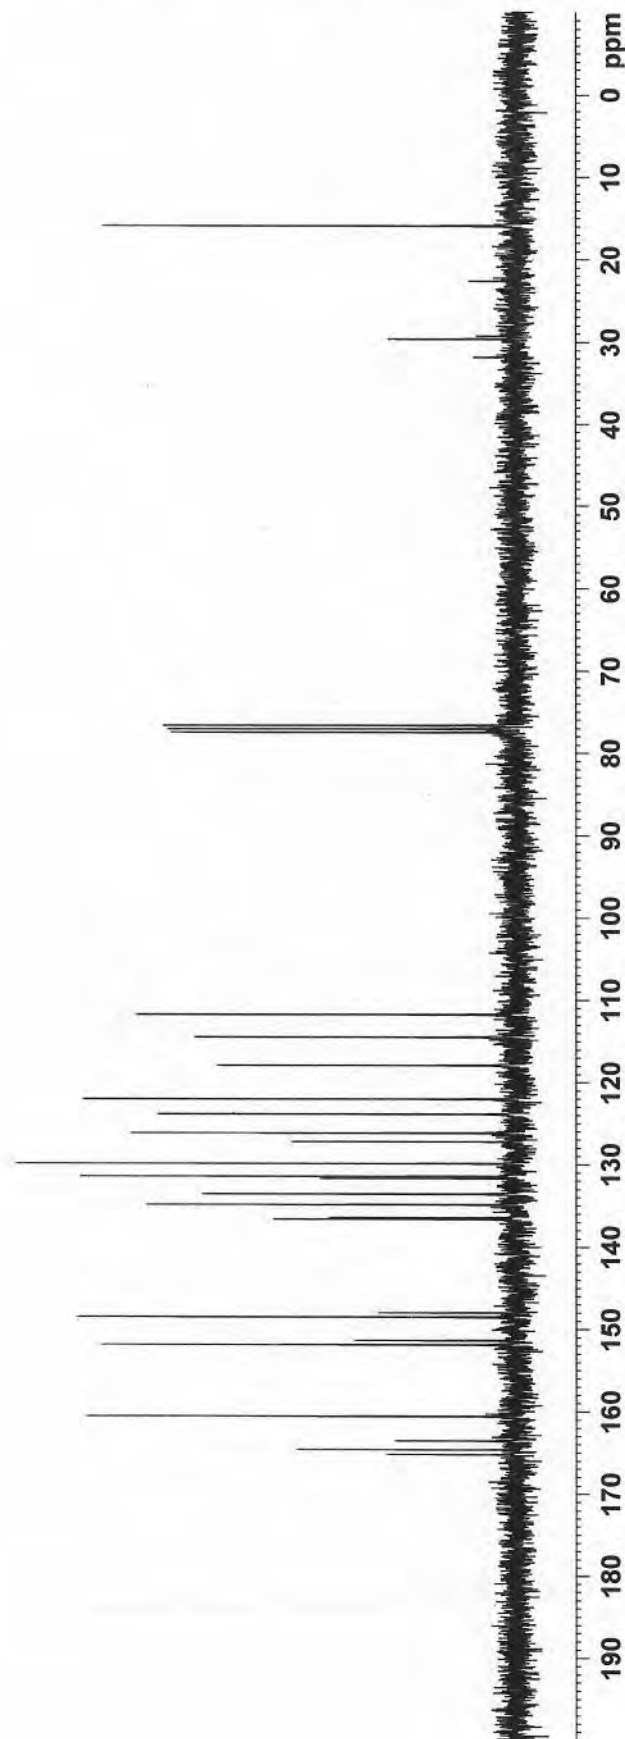

A9

SP121109-2 1H-NMR CDCl3 303K AV-300

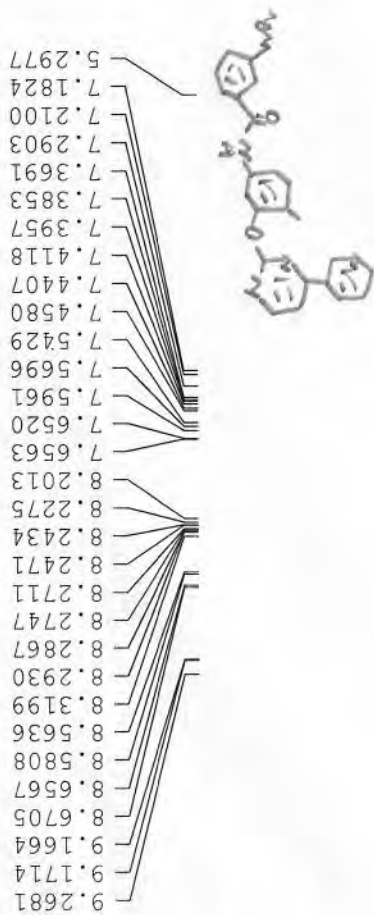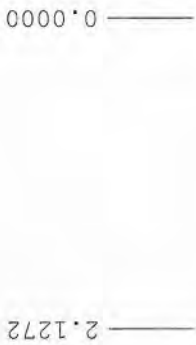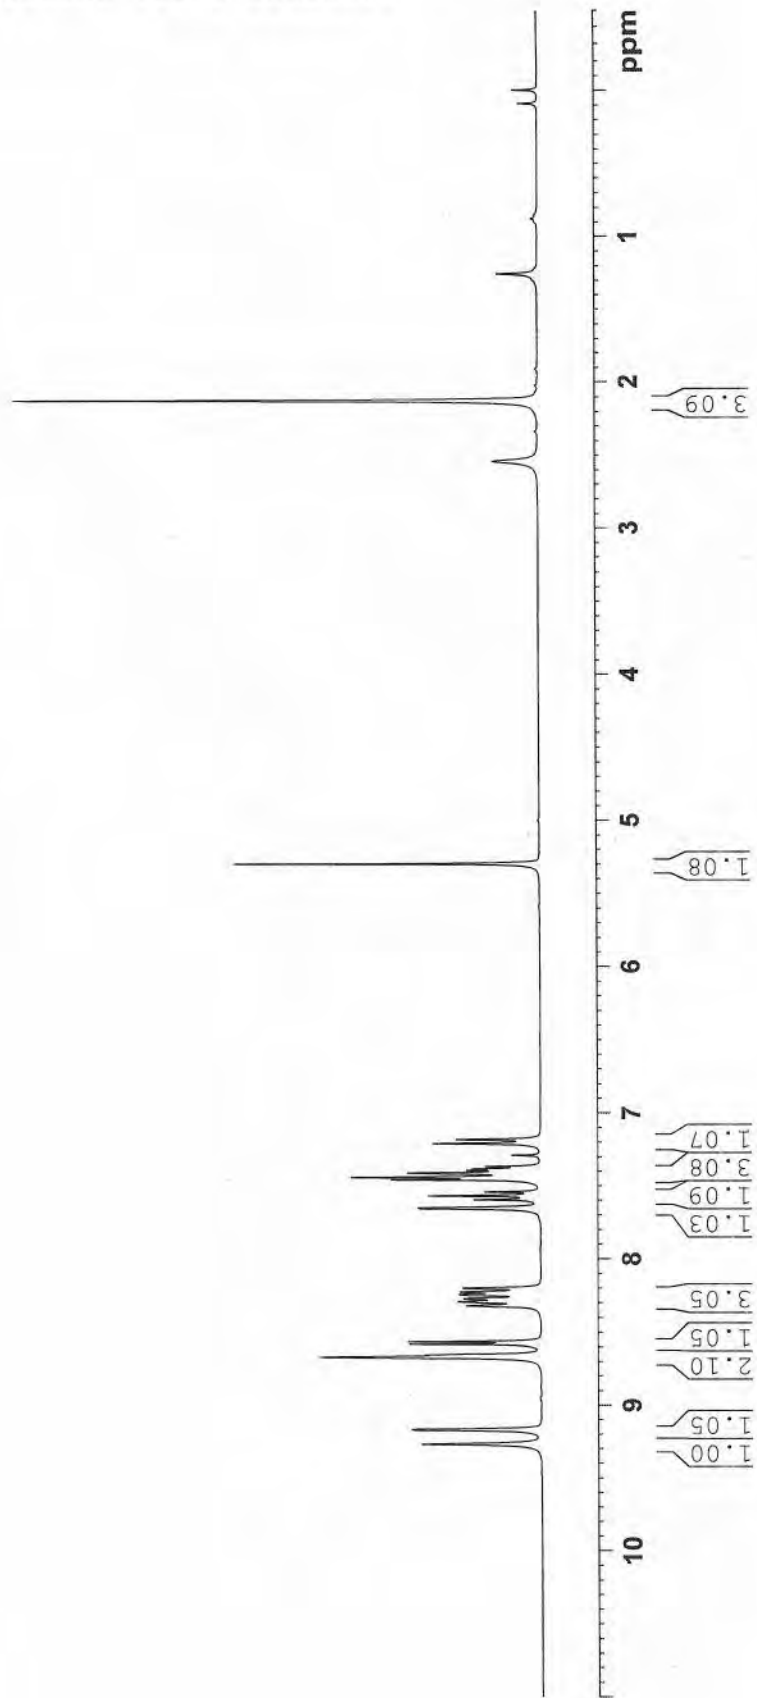



|                    |                     |                               |         |                        |                      |
|--------------------|---------------------|-------------------------------|---------|------------------------|----------------------|
| <b>Sample Name</b> |                     | <b>Position</b>               | p2E5    | <b>Instrument Name</b> | Instrument 1         |
| <b>User Name</b>   | QTOF-PC\QTOF        | <b>Inj Vol</b>                | 0.1     | <b>InjPosition</b>     |                      |
| <b>Sample Type</b> | Sample              | <b>IRM Calibration Status</b> | Success | <b>Data Filename</b>   | A9-p.d               |
| <b>ACQ Method</b>  | 20110418-MSonly-p.m | <b>Comment</b>                |         | <b>Acquired Time</b>   | 3/12/2018 3:09:32 PM |

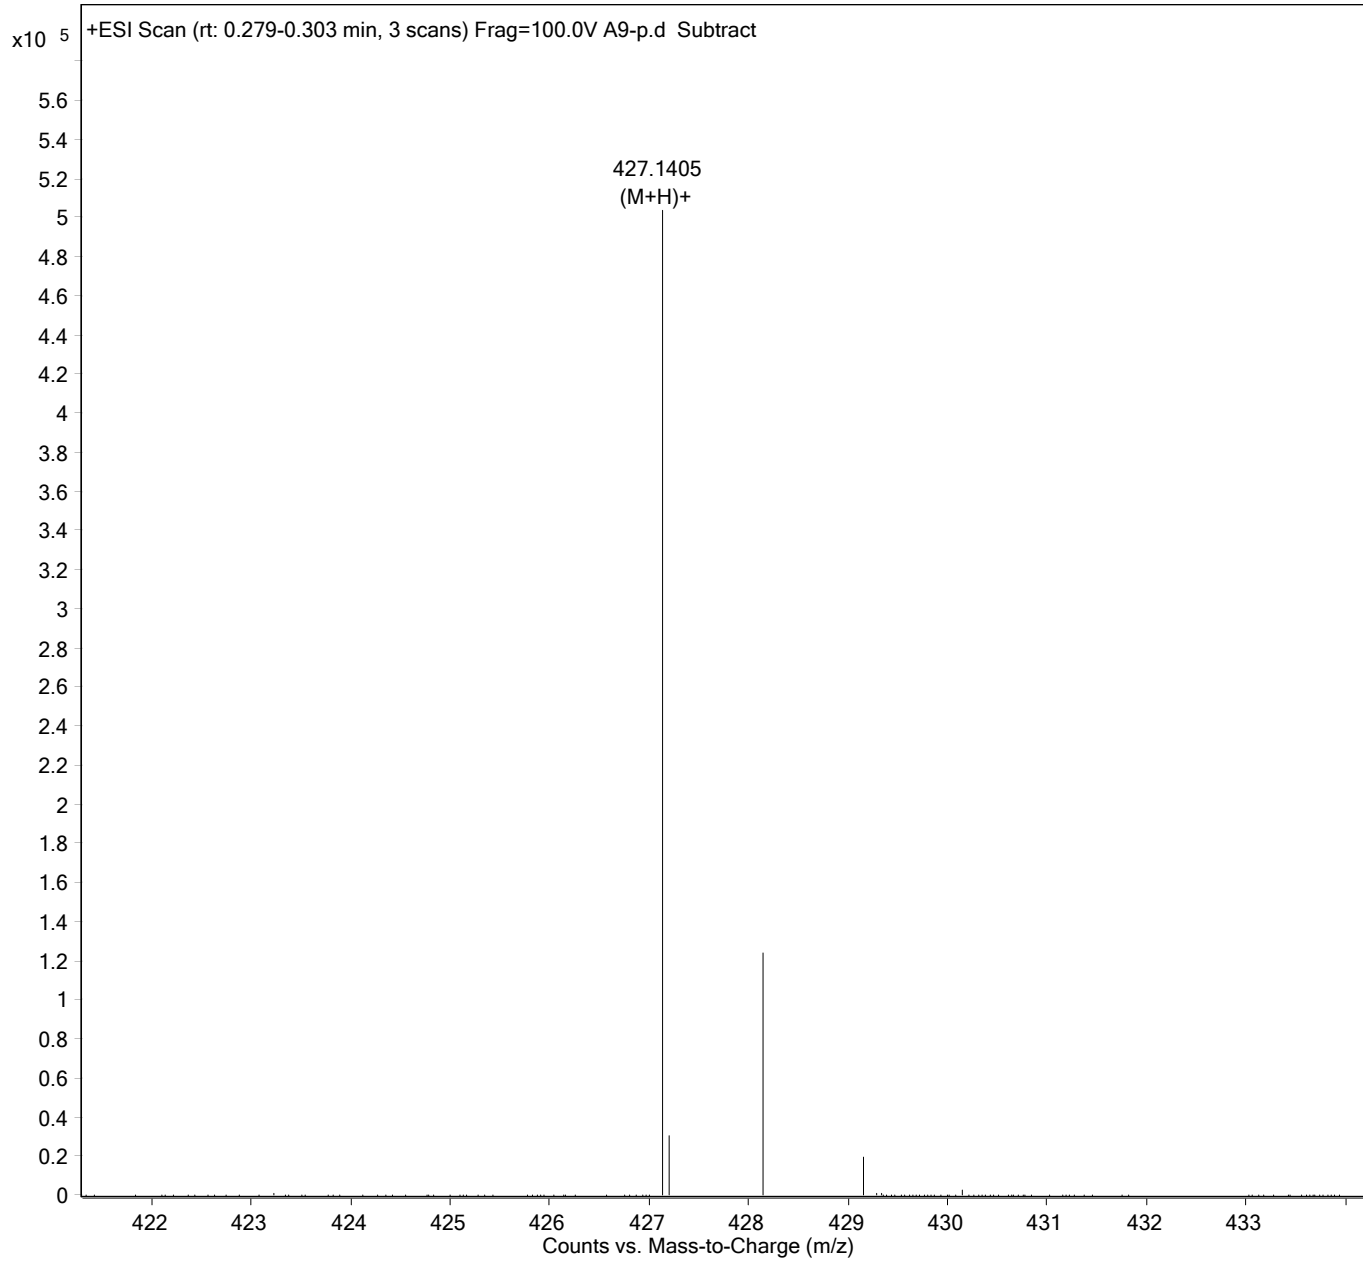

A 10

SP20131108-2-C C13-NMR CDCL3 303K AV-300

166.459  
165.309  
164.637  
160.565  
151.820  
151.387  
148.470  
137.021  
134.924  
131.762  
131.363  
129.594  
129.475  
126.717  
123.843  
117.644  
115.795  
115.506  
114.231  
111.656

77.499  
77.076  
76.647

15.947

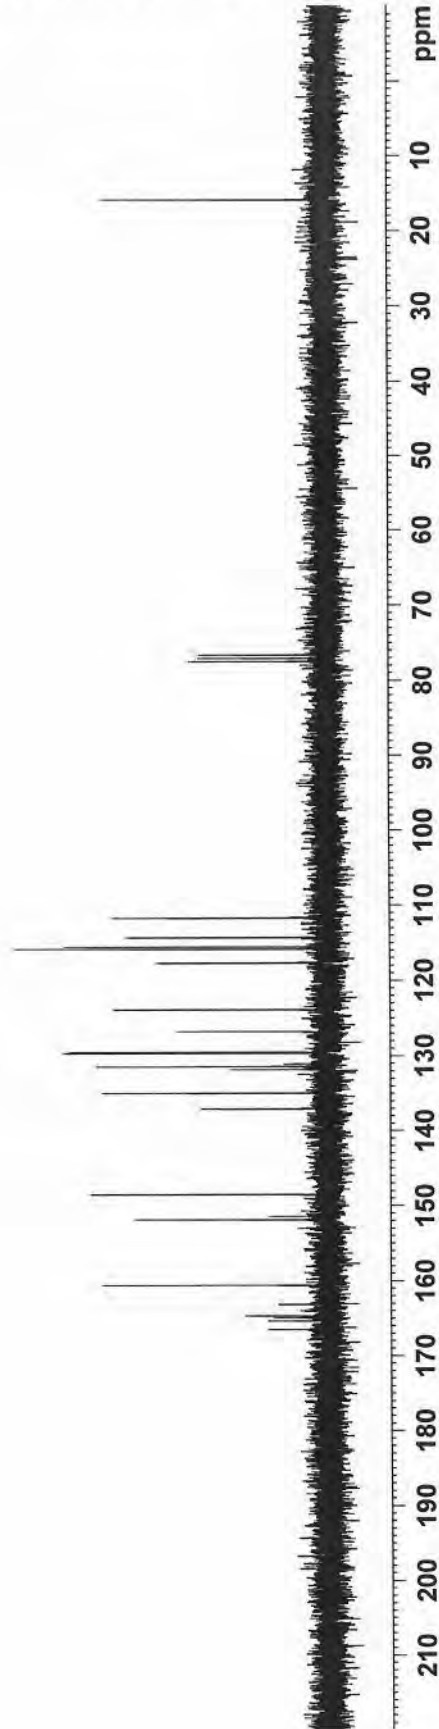

A 10

SP20131108-2 CDCL3 1HNMR AV300

8.6047  
8.5917  
8.4904  
8.4736  
8.3787  
8.2614  
8.2353  
7.7670  
7.7407  
7.7225  
7.5618  
7.3628  
7.3455  
7.3175  
7.2915  
7.1496  
7.1223  
6.9924  
6.9644  
6.9363

0.0003  
0.0853

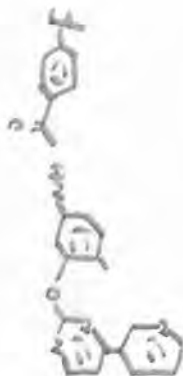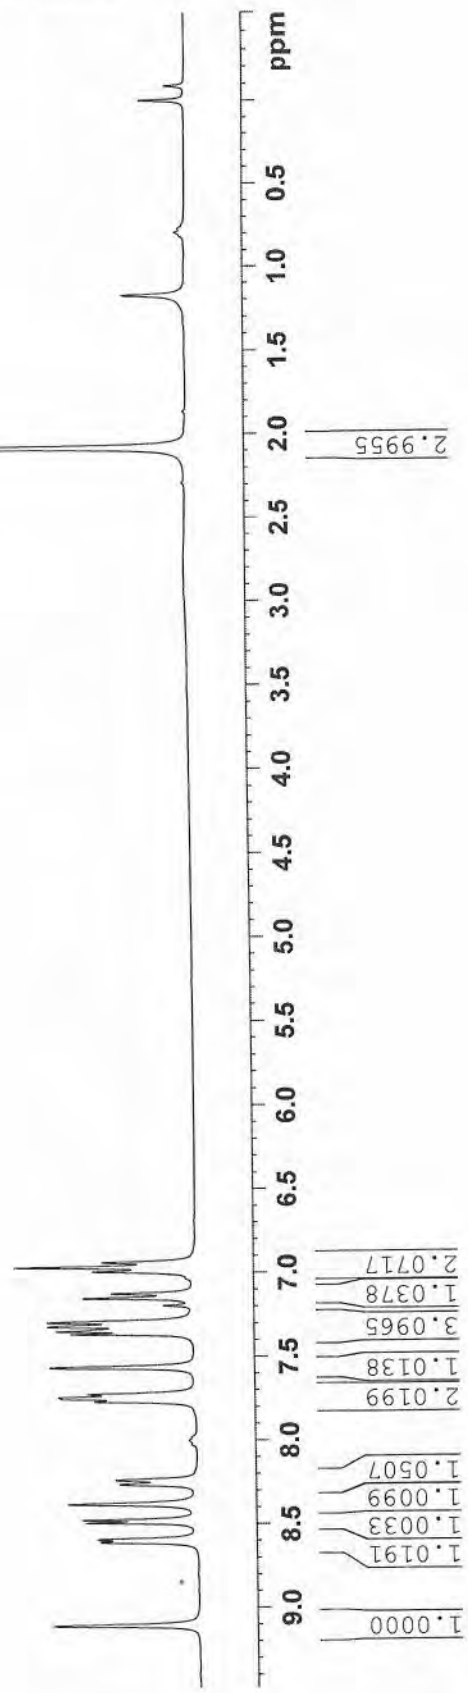

|                    |                     |                               |         |                        |                      |
|--------------------|---------------------|-------------------------------|---------|------------------------|----------------------|
| <b>Sample Name</b> |                     | <b>Position</b>               | p2E6    | <b>Instrument Name</b> | Instrument 1         |
| <b>User Name</b>   | QTOF-PC\QTOF        | <b>Inj Vol</b>                | 0.1     | <b>InjPosition</b>     |                      |
| <b>Sample Type</b> | Sample              | <b>IRM Calibration Status</b> | Success | <b>Data Filename</b>   | A10-p.d              |
| <b>ACQ Method</b>  | 20110418-MSonly-p.m | <b>Comment</b>                |         | <b>Acquired Time</b>   | 3/12/2018 3:16:43 PM |

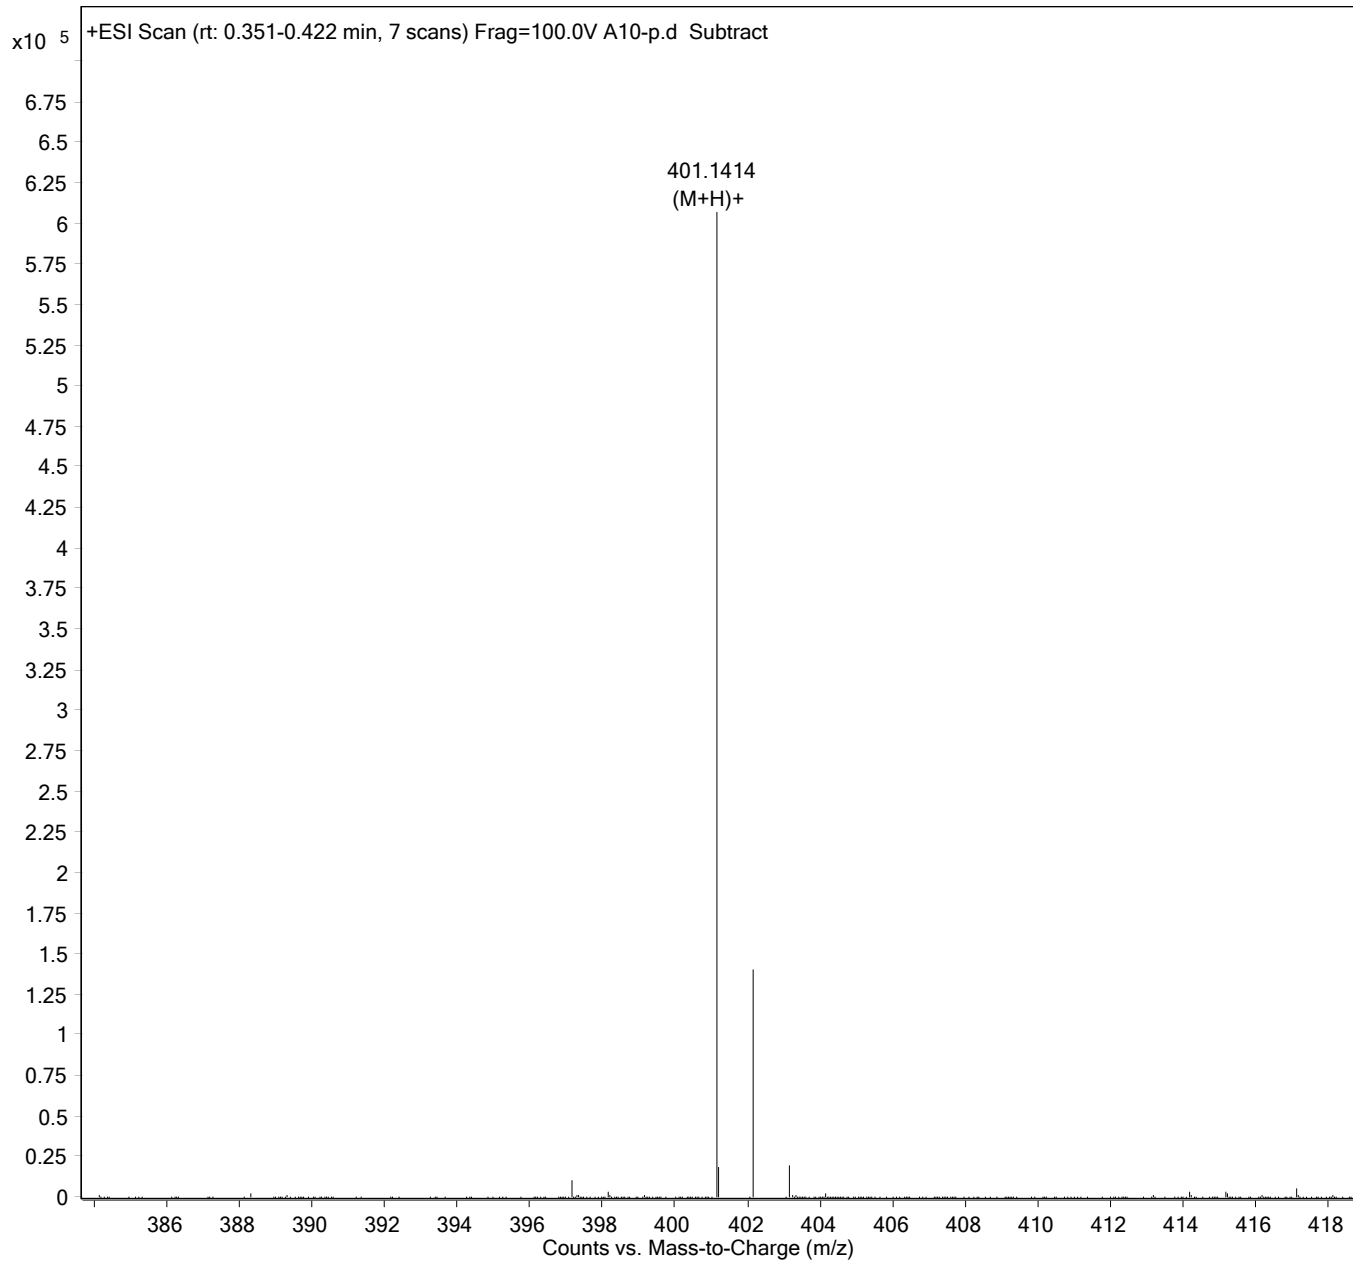

A11

SP121205-2 CDCl3 303K C13-NMR AV300

165.267  
164.714  
163.896  
160.617  
151.964  
151.435  
150.518  
148.575  
142.092  
136.467  
134.833  
131.691  
131.512  
127.423  
123.836  
121.050  
117.715  
114.374  
111.726

77.484  
77.060  
76.636

16.015

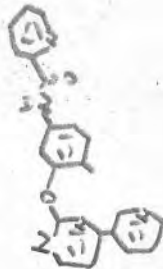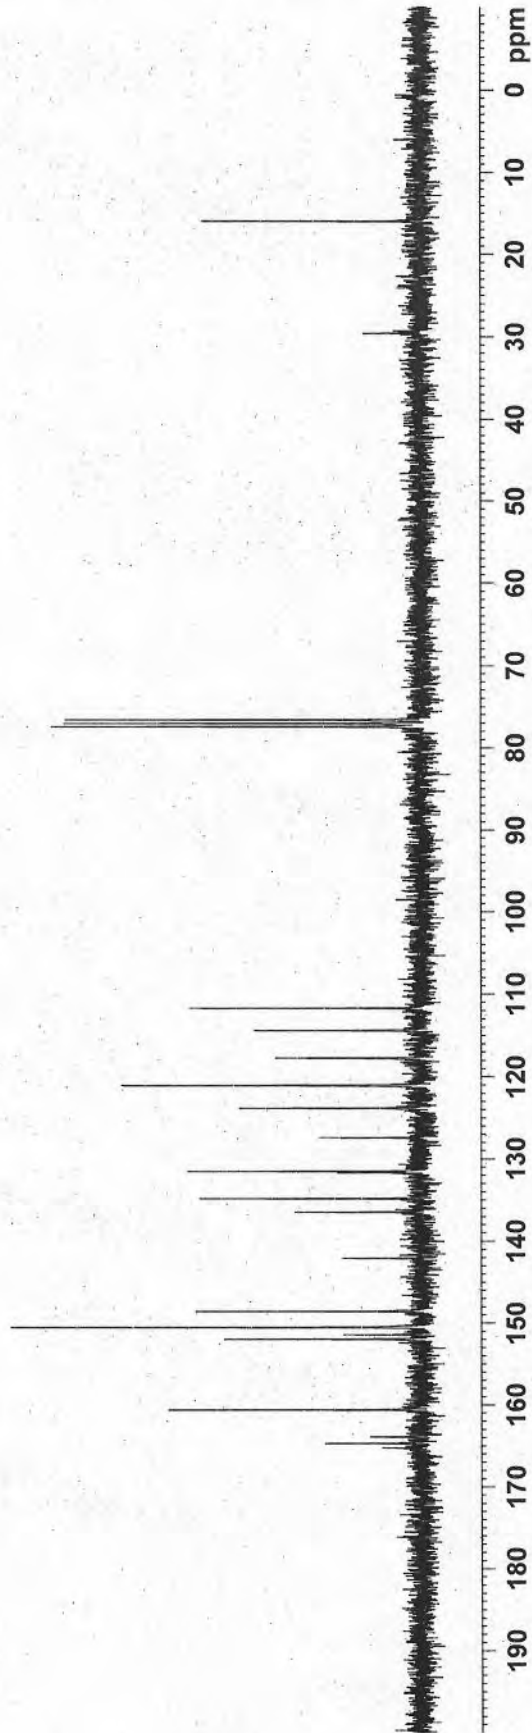

A11

SP121205-2 1H-NMR CDCl3 303K AV-300

- 9.1916
- 8.7585
- 8.6896
- 8.6002
- 8.5831
- 8.3434
- 8.3169
- 7.6623
- 7.4685
- 7.4513
- 7.4311
- 7.4166
- 7.4042
- 7.2731
- 7.2450

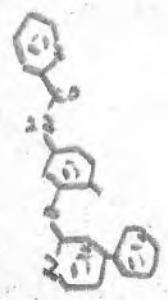

- 2.1823
- 0.0000

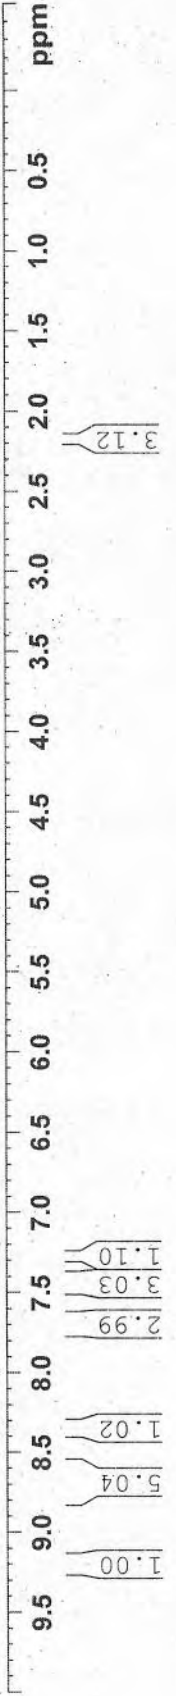

|                    |                     |                               |         |                        |                      |
|--------------------|---------------------|-------------------------------|---------|------------------------|----------------------|
| <b>Sample Name</b> |                     | <b>Position</b>               | p2E7    | <b>Instrument Name</b> | Instrument 1         |
| <b>User Name</b>   | QTOF-PC\QTOF        | <b>Inj Vol</b>                | 0.1     | <b>InjPosition</b>     |                      |
| <b>Sample Type</b> | Sample              | <b>IRM Calibration Status</b> | Success | <b>Data Filename</b>   | A11-p.d              |
| <b>ACQ Method</b>  | 20110418-MSonly-p.m | <b>Comment</b>                |         | <b>Acquired Time</b>   | 3/12/2018 3:19:42 PM |

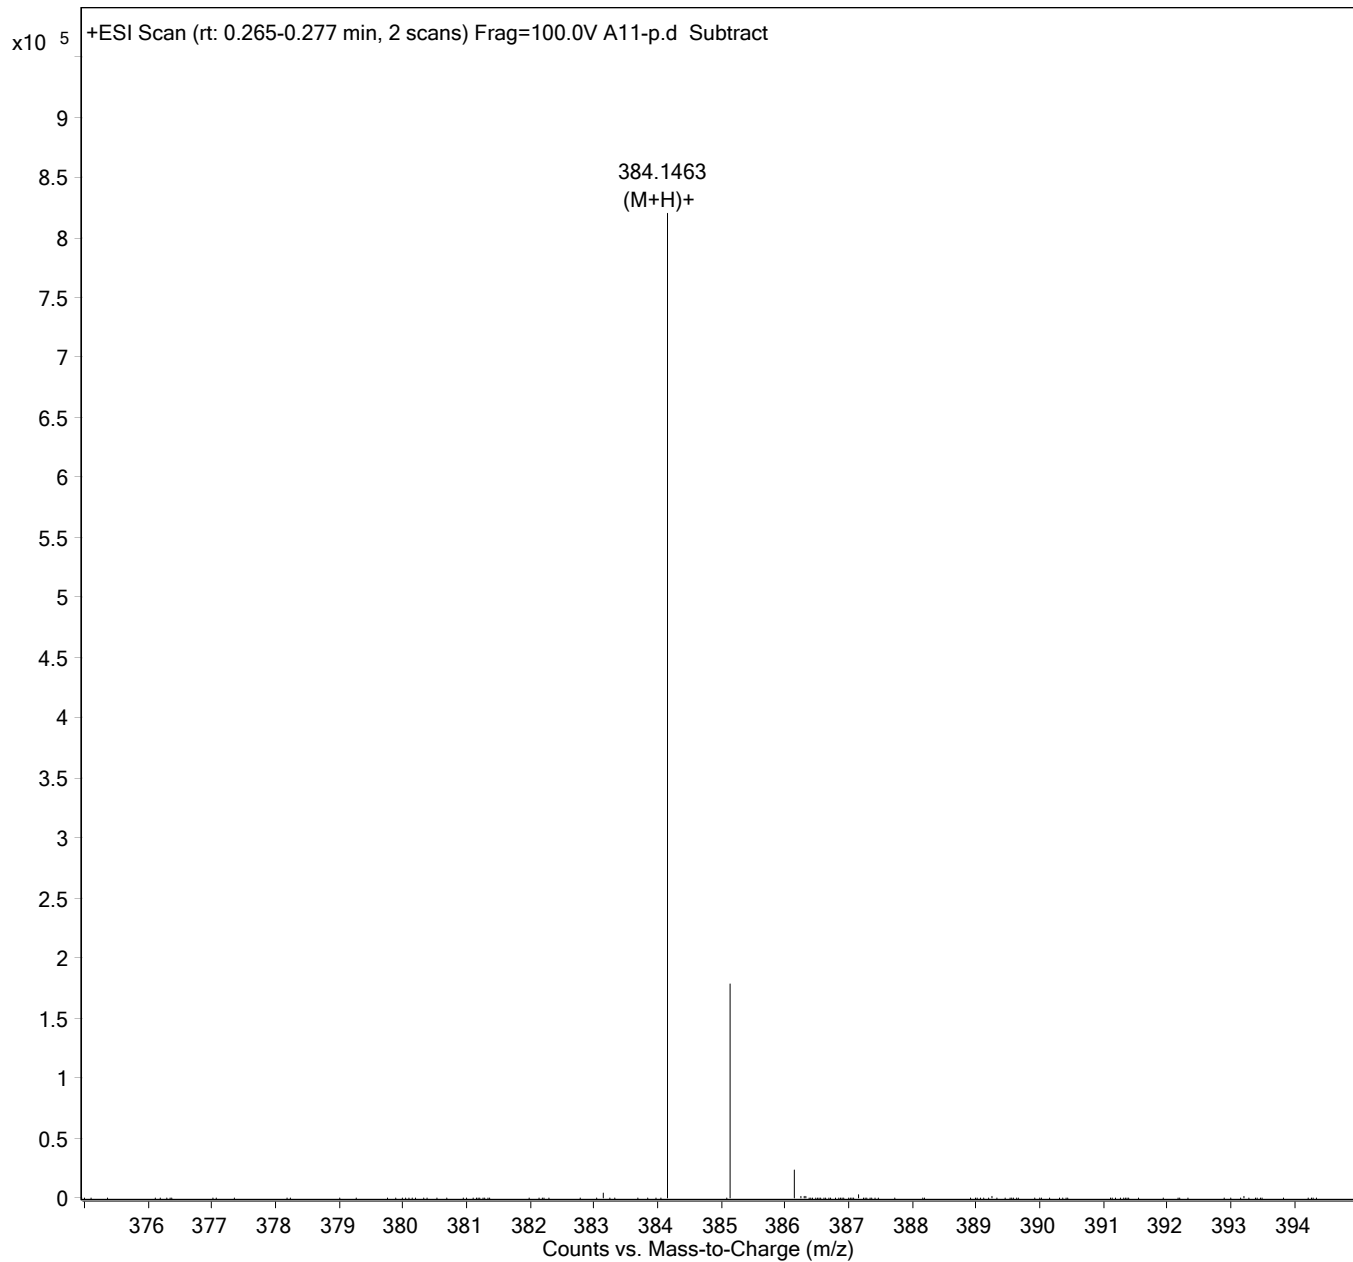

A12

SP130830-3-C C13-NMR CDCL3 303K AV-300

165.242  
164.595  
164.130  
160.548  
152.010  
151.792  
151.332  
148.443  
148.016  
136.914  
135.605  
134.907  
131.723  
131.379  
130.884  
126.987  
123.851  
123.582  
117.869  
114.445  
111.698

77.526  
77.100  
76.676

15.940

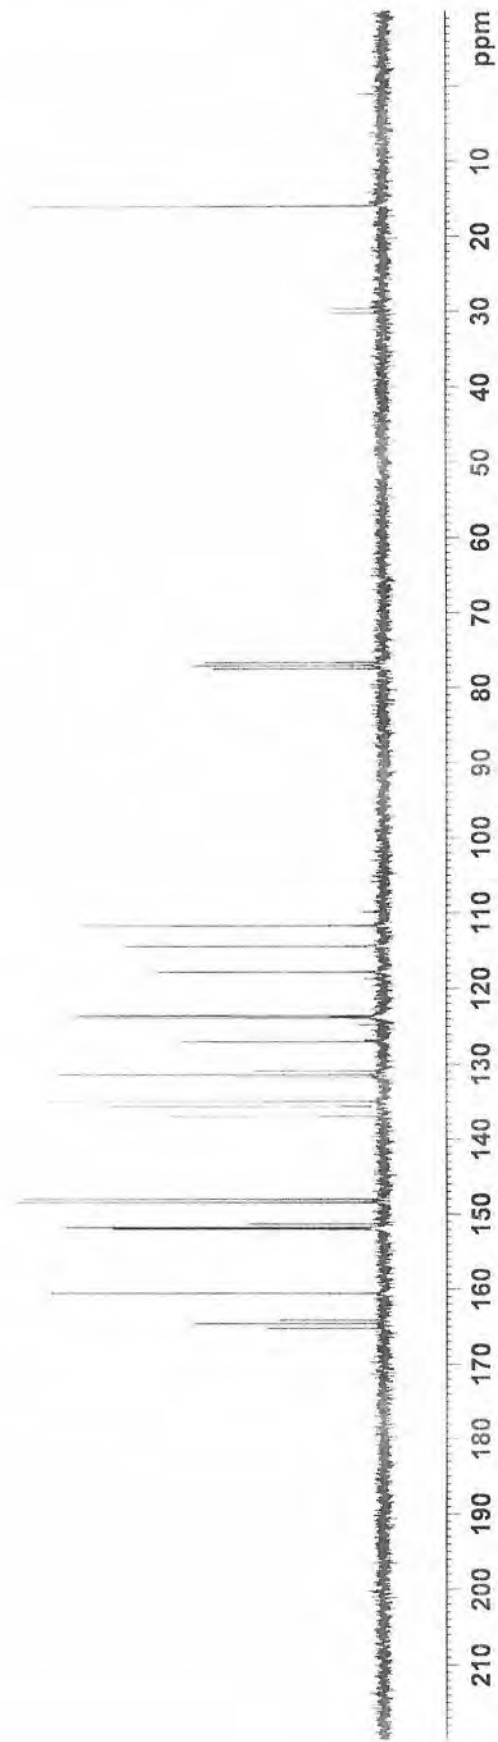



SP20130830-3 CDCL3 1HNMR AV300

0.1944  
 0.0003  
 0.0903  
 0.1979

8.5374  
 8.5252  
 8.4769  
 8.4597  
 8.2387  
 8.2177  
 8.2119  
 8.0785  
 8.0519  
 7.5741  
 7.5691  
 7.3557  
 7.3380  
 7.3213  
 7.3039  
 7.2942  
 7.2777  
 7.2451  
 7.2287  
 7.2190  
 7.2047  
 7.1341  
 7.1065

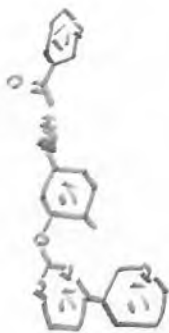

2.0588

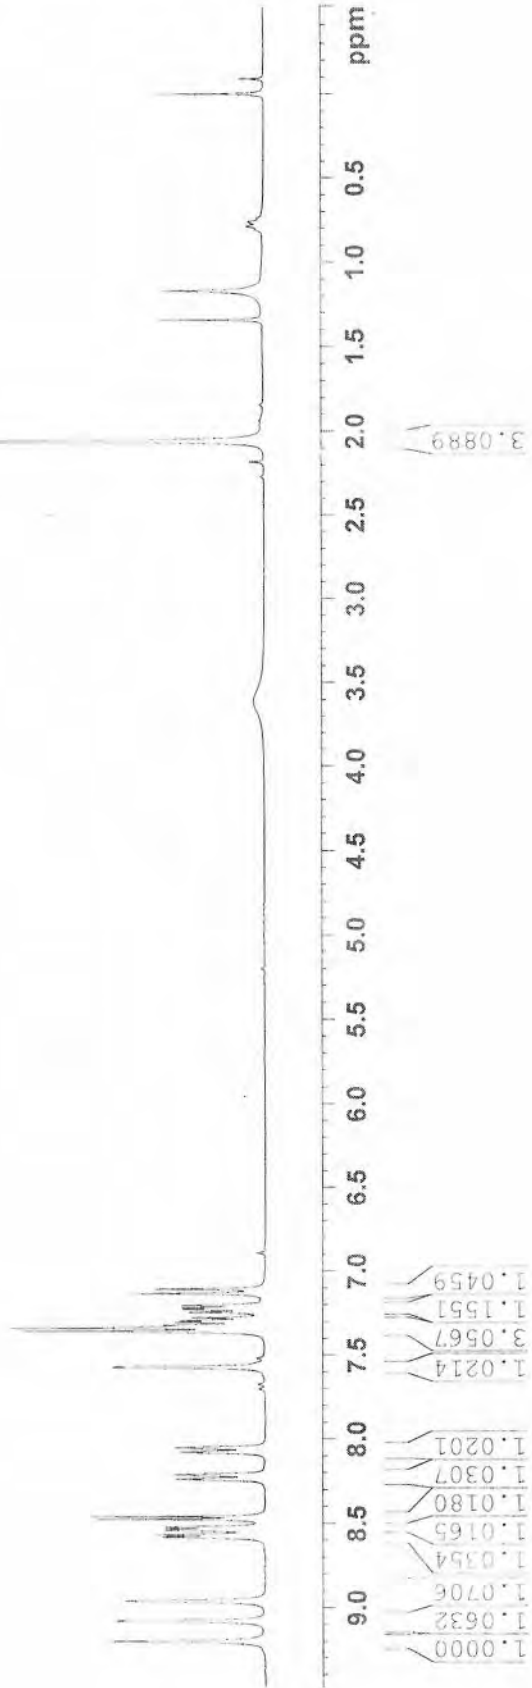

|                    |                     |                               |         |                        |                      |
|--------------------|---------------------|-------------------------------|---------|------------------------|----------------------|
| <b>Sample Name</b> |                     | <b>Position</b>               | p2E8    | <b>Instrument Name</b> | Instrument 1         |
| <b>User Name</b>   | QTOF-PC\QTOF        | <b>Inj Vol</b>                | 0.1     | <b>InjPosition</b>     |                      |
| <b>Sample Type</b> | Sample              | <b>IRM Calibration Status</b> | Success | <b>Data Filename</b>   | A12-p.d              |
| <b>ACQ Method</b>  | 20110418-MSonly-p.m | <b>Comment</b>                |         | <b>Acquired Time</b>   | 3/12/2018 3:24:41 PM |

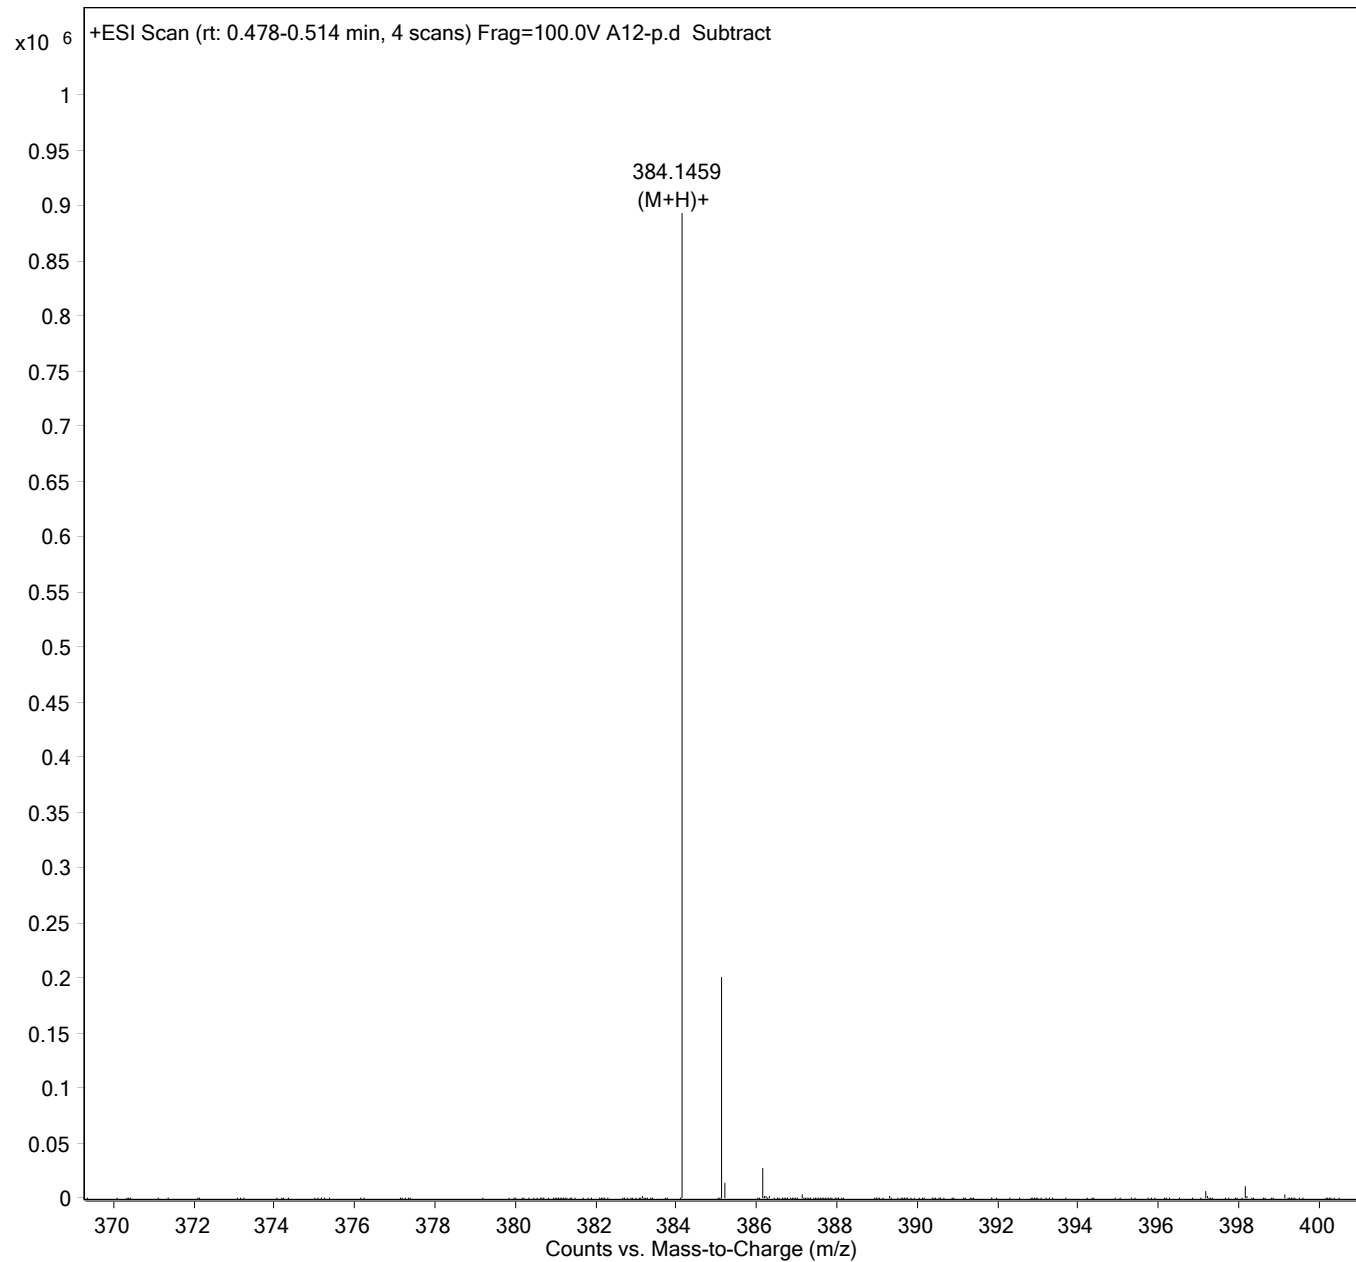

B1

SP121205-4 CDCl<sub>3</sub> 303K C13-NMR AV300

167.153  
166.308  
165.184  
159.834  
151.459  
137.419  
135.811  
134.847  
131.609  
131.441  
131.291  
128.925  
128.466  
127.359  
127.257  
126.500  
117.818  
114.321  
111.740

77.789  
77.364  
76.938

16.002

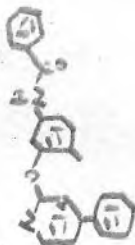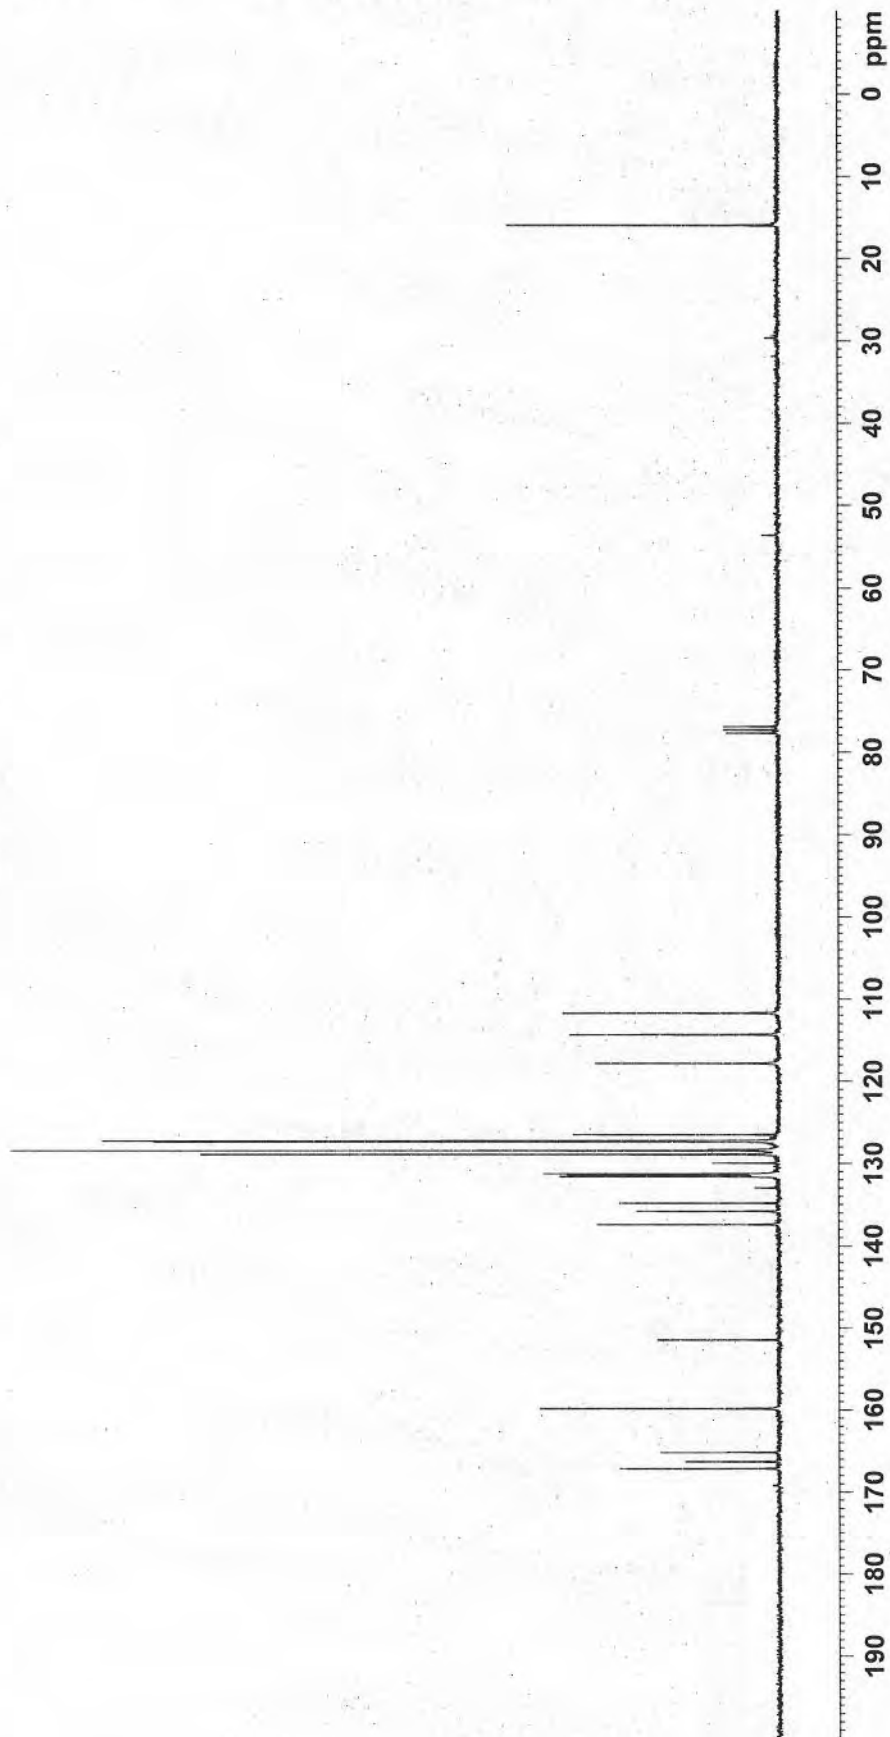

BI

SP121205-4 1H-NMR CDCI3 303K AV-300

8.8544  
8.3767  
8.3594  
7.9762  
7.9551  
7.7517  
7.7273  
7.6139  
7.5256  
7.5026  
7.4086  
7.3892  
7.3646  
7.3393  
7.3188  
7.3019  
7.2643  
7.2389  
7.2149  
7.1470  
7.1194

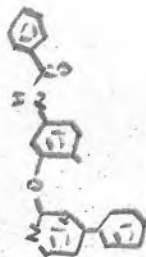

2.0956  
0.0000

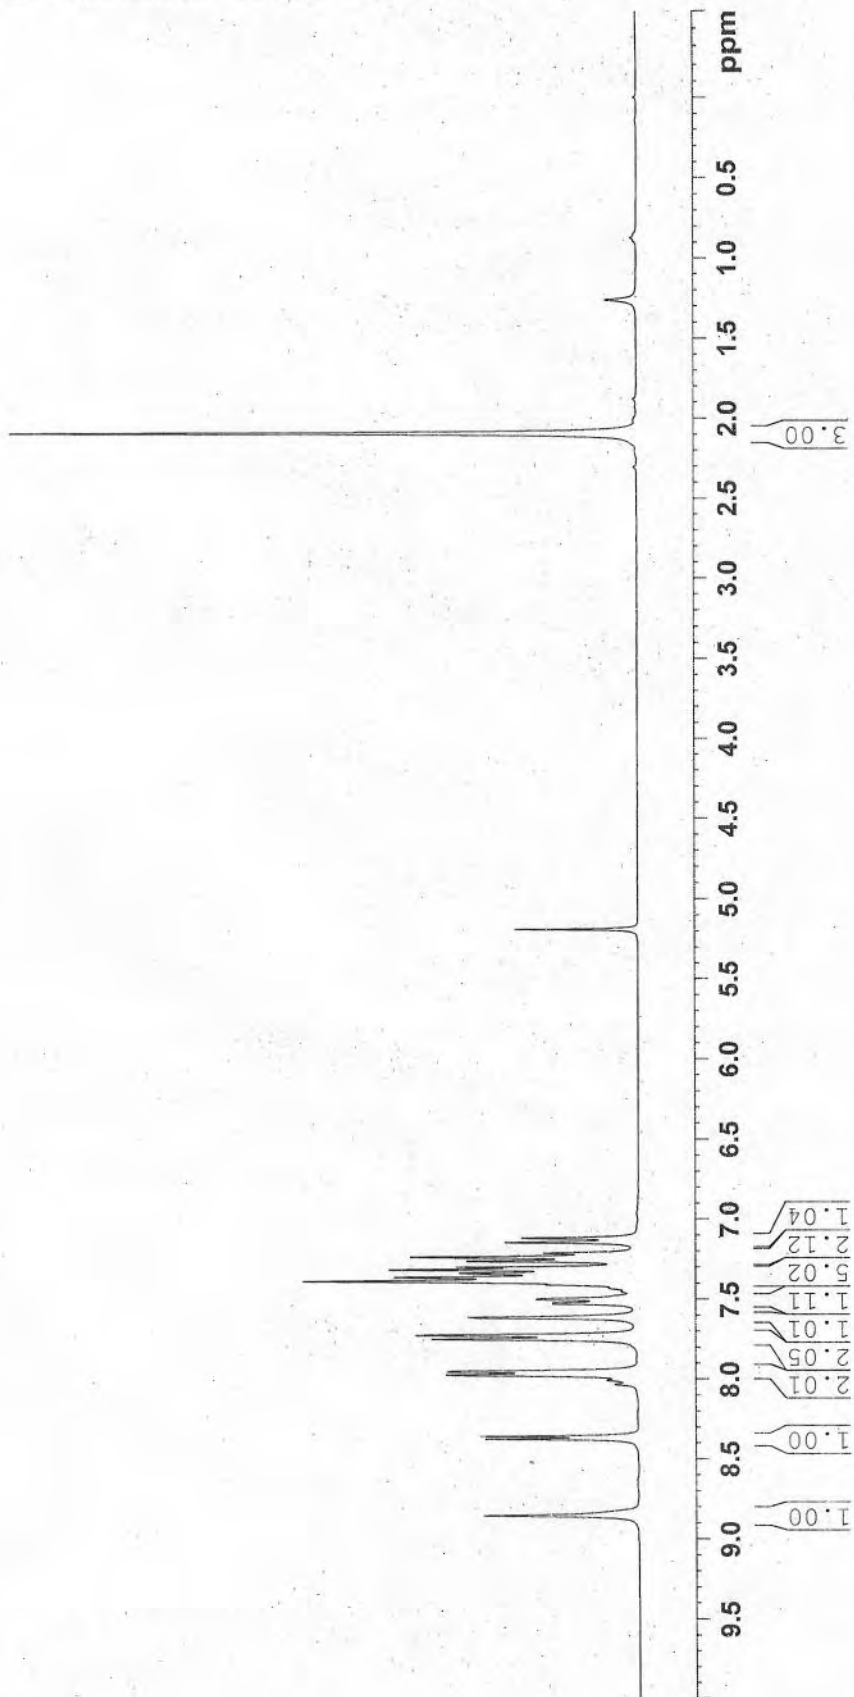

|                    |                     |                               |         |                        |                      |
|--------------------|---------------------|-------------------------------|---------|------------------------|----------------------|
| <b>Sample Name</b> |                     | <b>Position</b>               | p2E9    | <b>Instrument Name</b> | Instrument 1         |
| <b>User Name</b>   | QTOF-PC\QTOF        | <b>Inj Vol</b>                | 0.1     | <b>InjPosition</b>     |                      |
| <b>Sample Type</b> | Sample              | <b>IRM Calibration Status</b> | Success | <b>Data Filename</b>   | B1-p.d               |
| <b>ACQ Method</b>  | 20110418-MSonly-p.m | <b>Comment</b>                |         | <b>Acquired Time</b>   | 3/12/2018 3:27:08 PM |

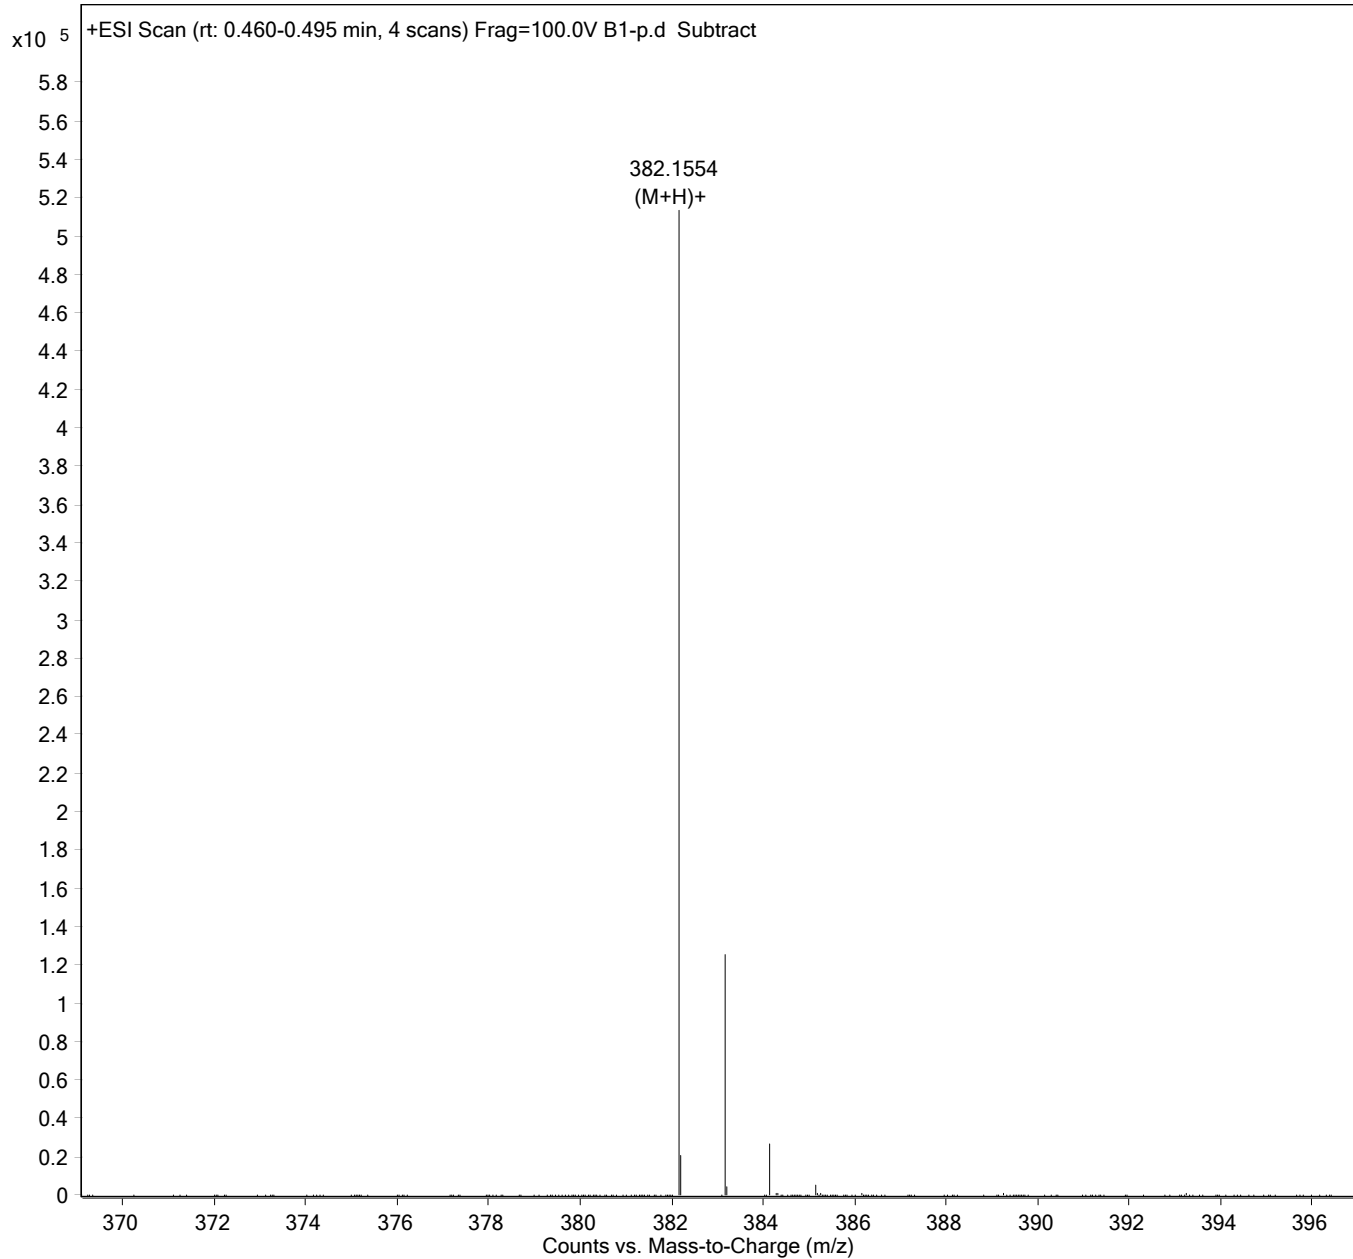

B7

SP130830-4-C C13-NMR CDCL3 303K AV-300

169.024  
167.187  
165.251  
159.942  
151.497  
136.780  
135.951  
134.457  
131.374  
131.238  
129.474  
129.116  
128.921  
127.542  
127.345  
126.621  
117.025  
113.620  
111.611  
111.387  
77.504  
77.079  
76.656  
44.680  
15.953

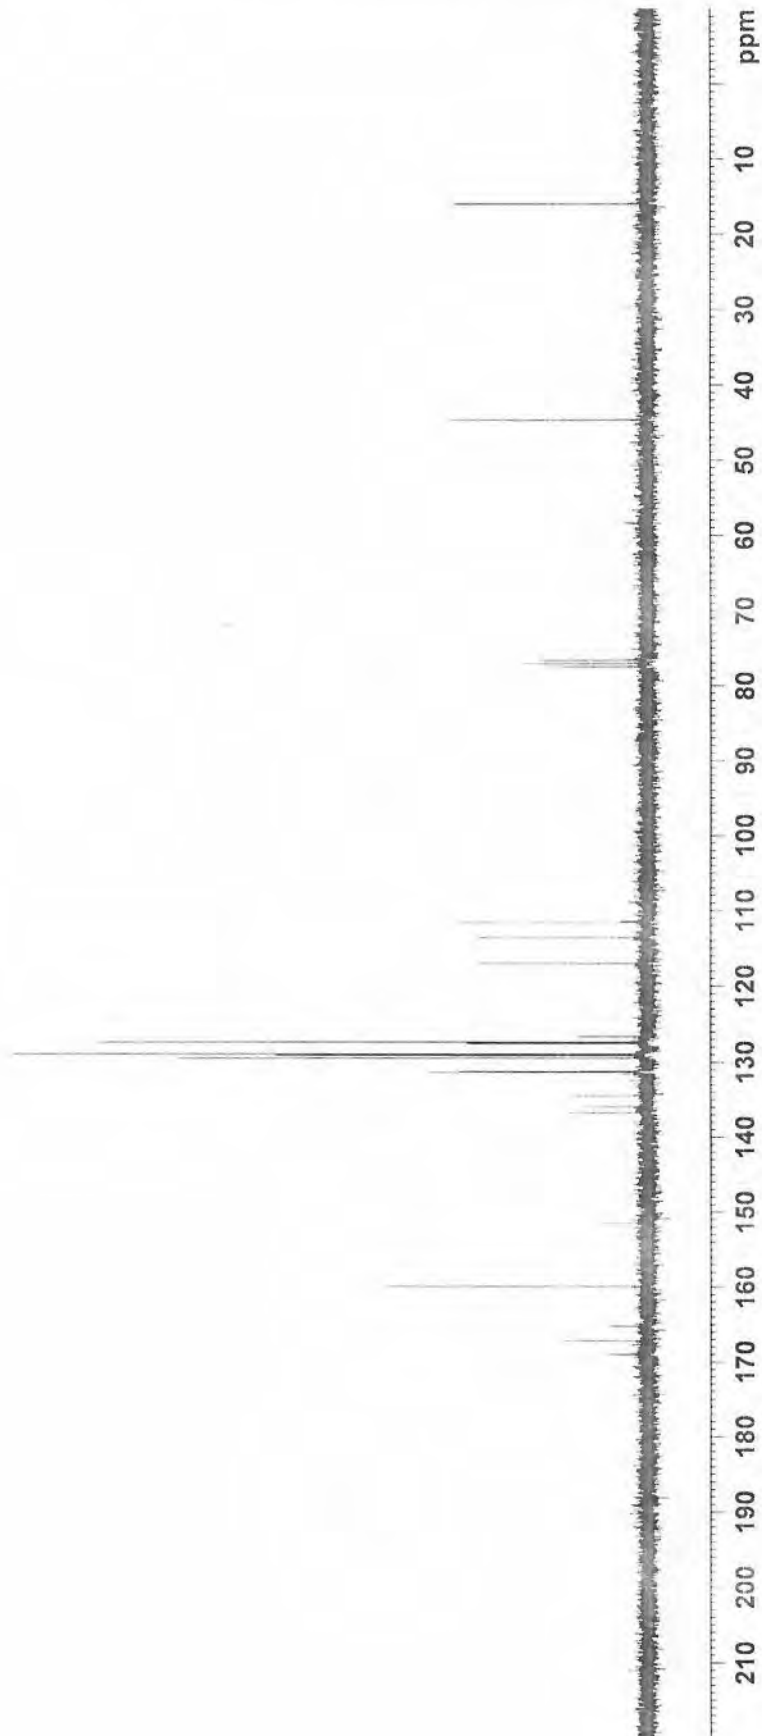

B2  
SP20130830-4 CDCL3 1HNMR AV300

0.0357  
-0.0463

2.0865

3.6086

8.4325  
8.4156  
7.9760  
7.9545  
7.4182  
7.3970  
7.3488  
7.3317  
7.2923  
7.2675  
7.2386  
7.2061  
7.1277  
7.1006

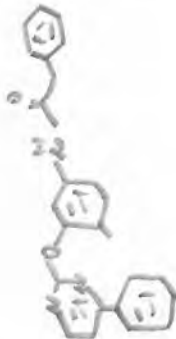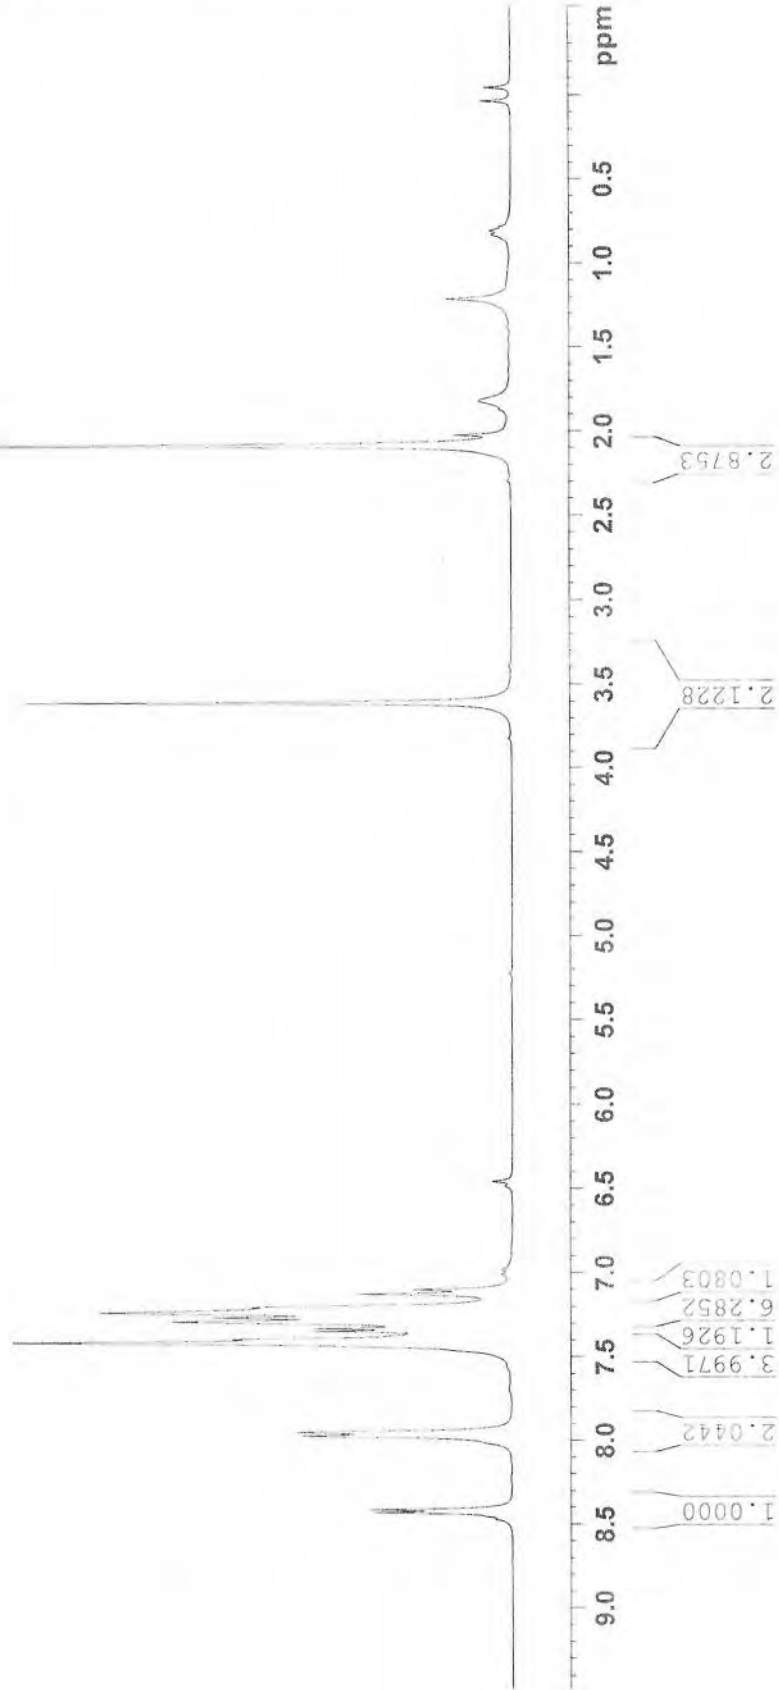

|                    |                     |                               |         |                        |                      |
|--------------------|---------------------|-------------------------------|---------|------------------------|----------------------|
| <b>Sample Name</b> |                     | <b>Position</b>               | p2F1    | <b>Instrument Name</b> | Instrument 1         |
| <b>User Name</b>   | QTOF-PC\QTOF        | <b>Inj Vol</b>                | 0.1     | <b>InjPosition</b>     |                      |
| <b>Sample Type</b> | Sample              | <b>IRM Calibration Status</b> | Success | <b>Data Filename</b>   | B2-p.d               |
| <b>ACQ Method</b>  | 20110418-MSonly-p.m | <b>Comment</b>                |         | <b>Acquired Time</b>   | 3/12/2018 3:29:48 PM |

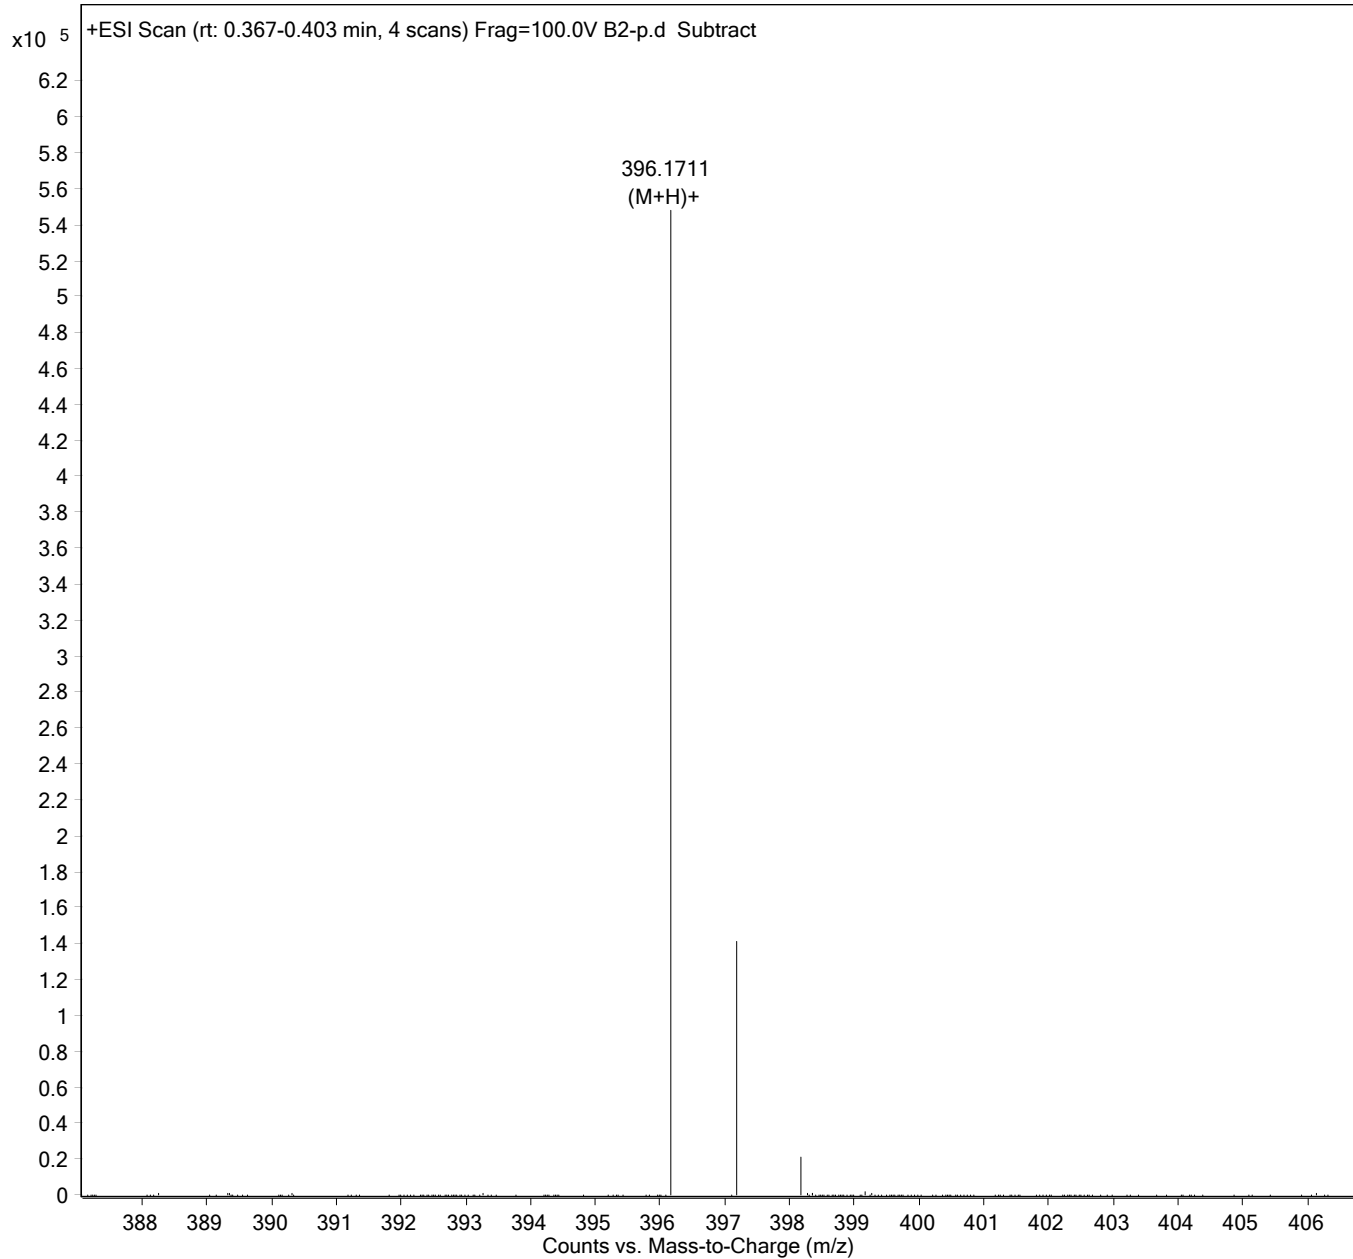



SP121128-3 CDCl<sub>3</sub> 303K C13-NMR AV300

167.189  
165.992  
165.269  
159.929  
151.546  
138.516  
137.166  
135.921  
134.908  
134.015  
132.463  
131.395  
131.348  
130.592  
128.929  
128.510  
128.267  
127.364  
127.207  
126.614  
124.064  
117.463  
114.033  
111.638

77.547  
77.124  
76.700

21.334  
15.995

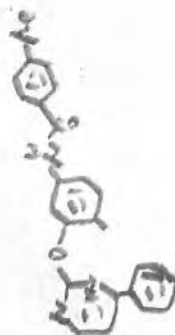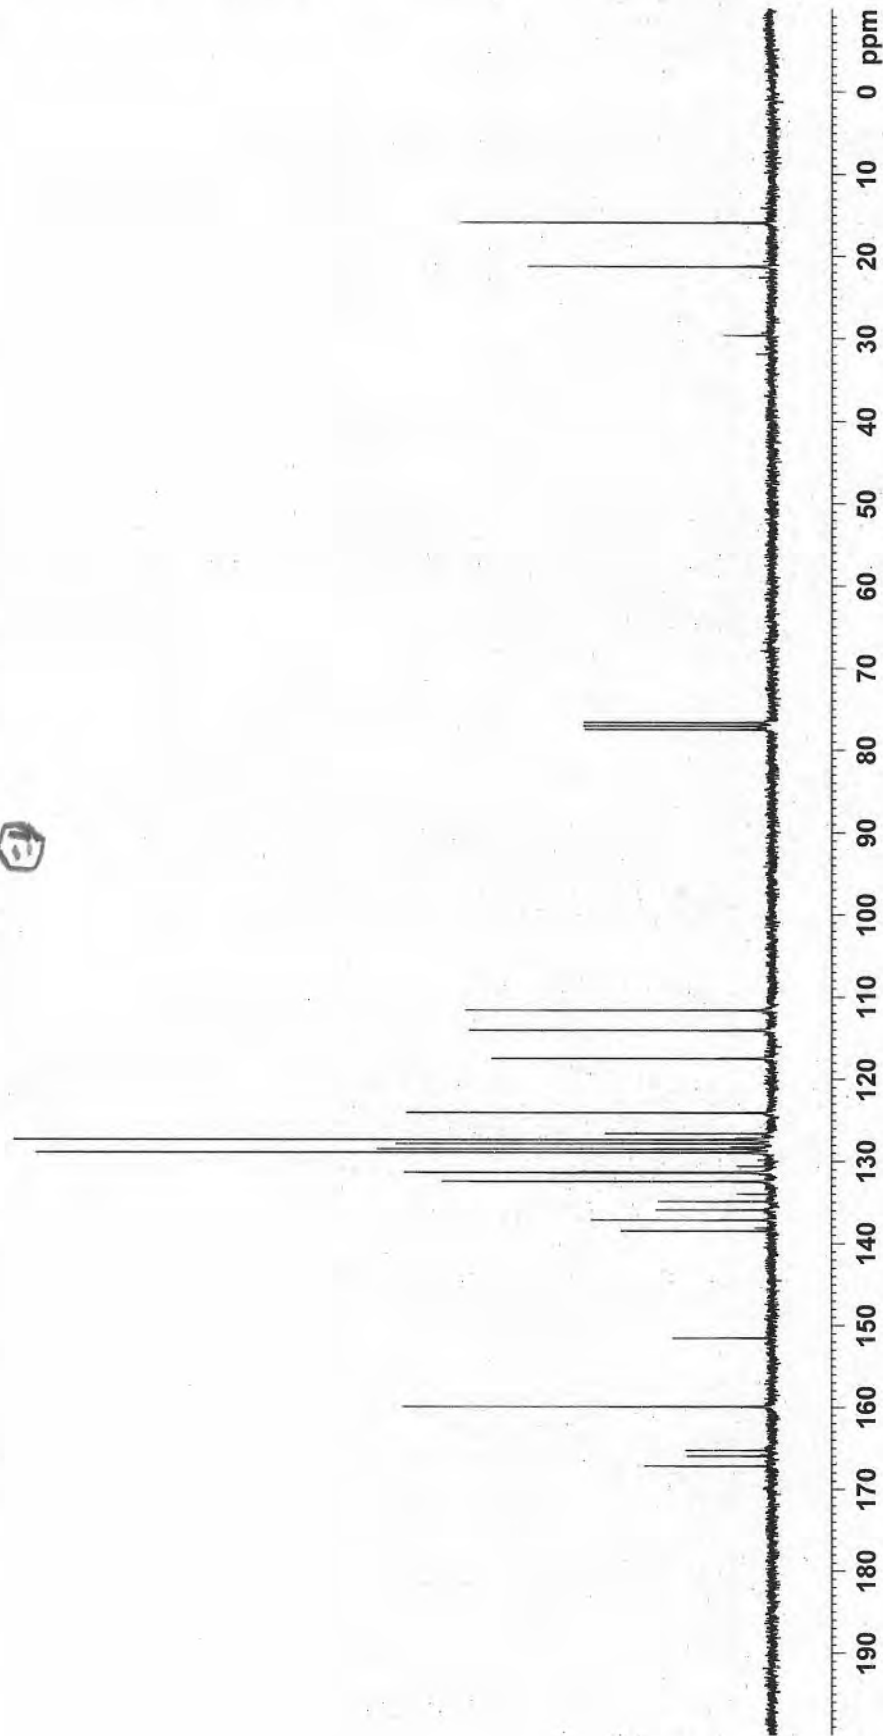

B 3

SP121128-3 1HNMR CDCI3 303K AV-300

8.4896  
8.4724  
8.2193  
8.0285  
8.0084  
8.0031  
7.6153  
7.5574  
7.5147  
7.4805  
7.4579  
7.4354  
7.3978  
7.3804  
7.2674  
7.2535  
7.2294  
7.2020

2.3277  
2.1502

0.0009

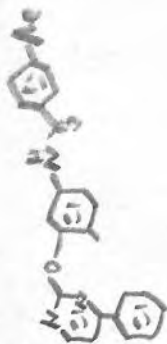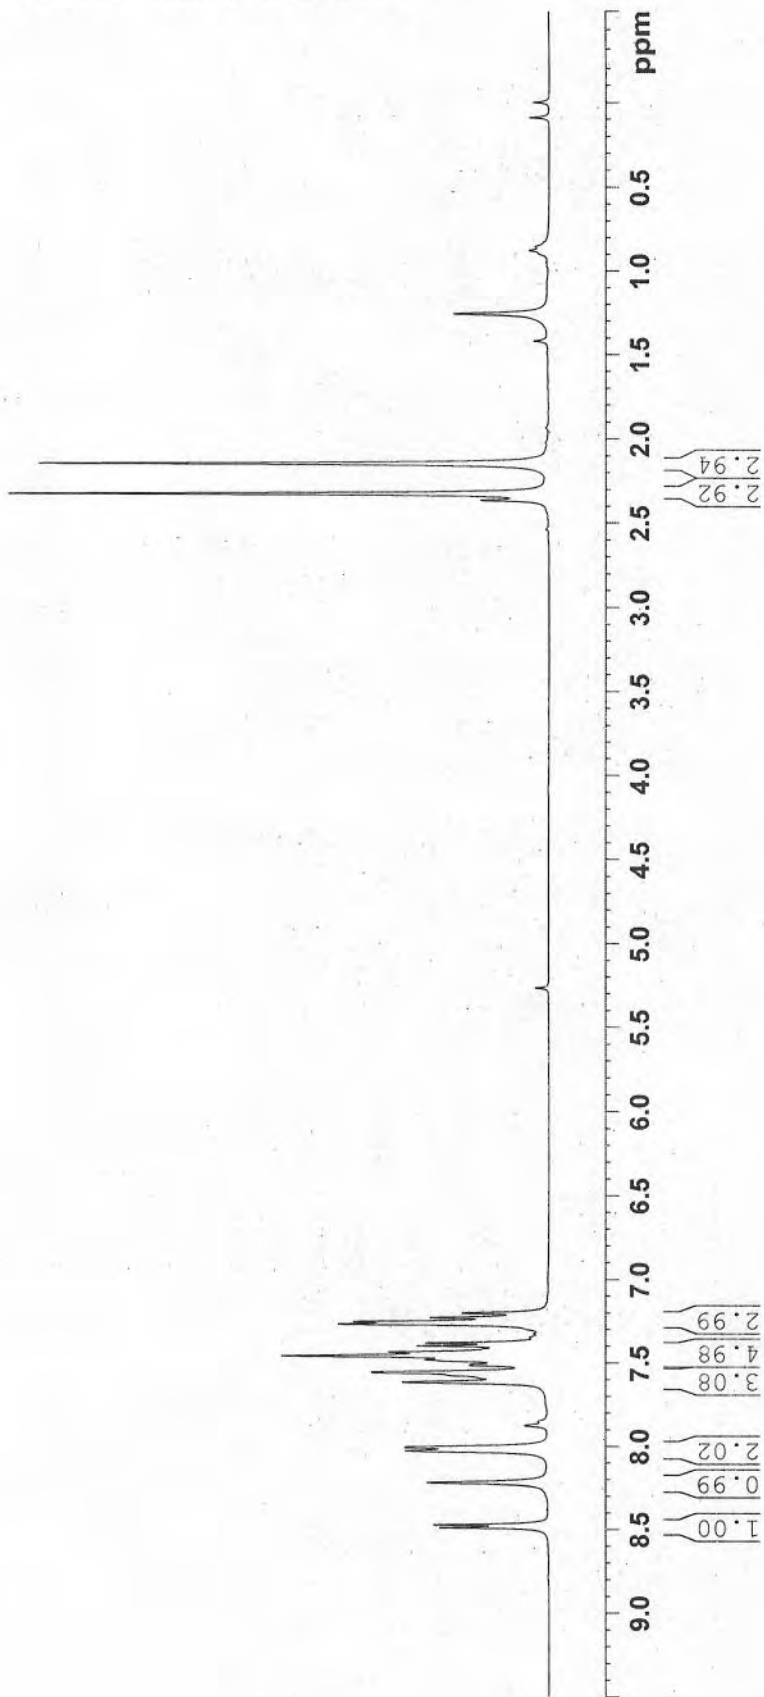

|                    |                     |                               |         |                        |                      |
|--------------------|---------------------|-------------------------------|---------|------------------------|----------------------|
| <b>Sample Name</b> |                     | <b>Position</b>               | p2F2    | <b>Instrument Name</b> | Instrument 1         |
| <b>User Name</b>   | QTOF-PC\QTOF        | <b>Inj Vol</b>                | 0.1     | <b>InjPosition</b>     |                      |
| <b>Sample Type</b> | Sample              | <b>IRM Calibration Status</b> | Success | <b>Data Filename</b>   | B3-p.d               |
| <b>ACQ Method</b>  | 20110418-MSonly-p.m | <b>Comment</b>                |         | <b>Acquired Time</b>   | 3/12/2018 3:32:10 PM |

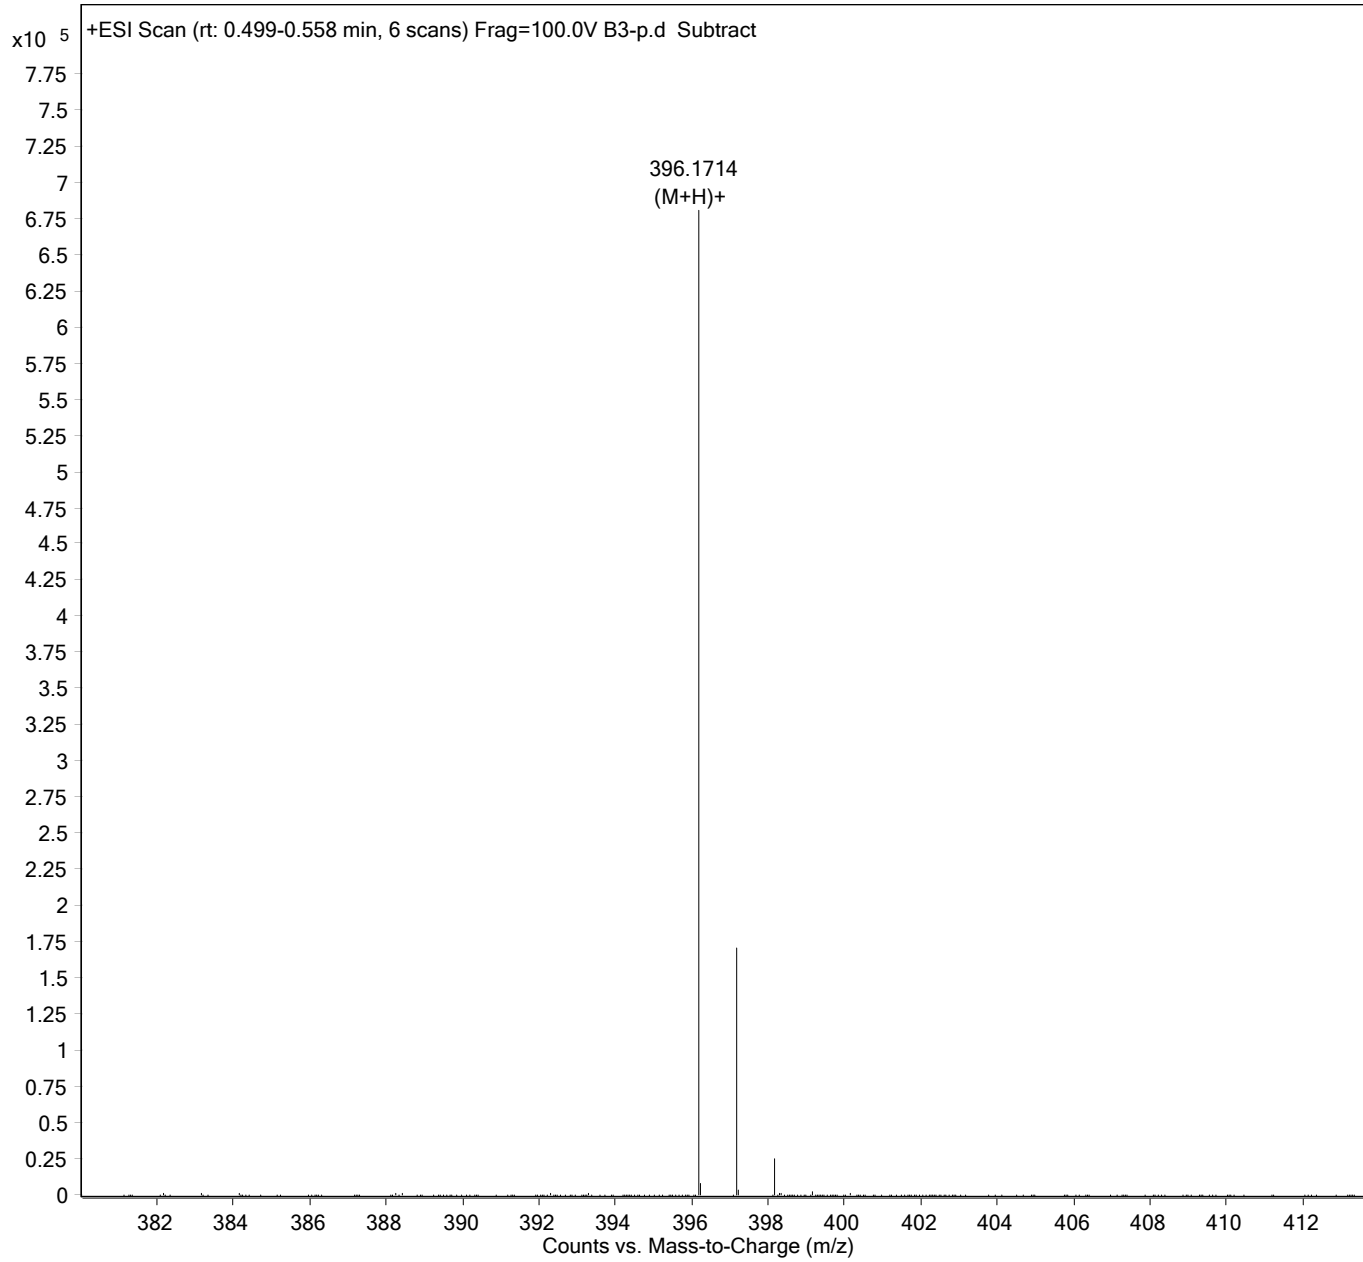

B4

SP121202-2 CDCl3 303K C13-NMR AV300

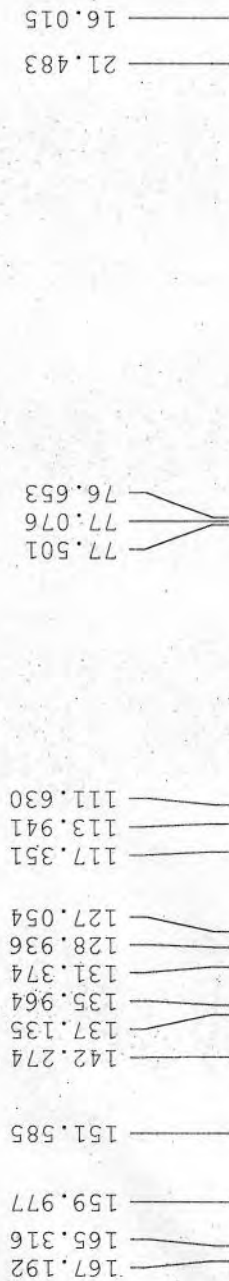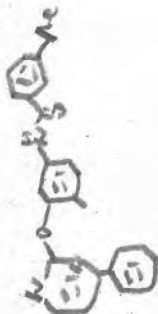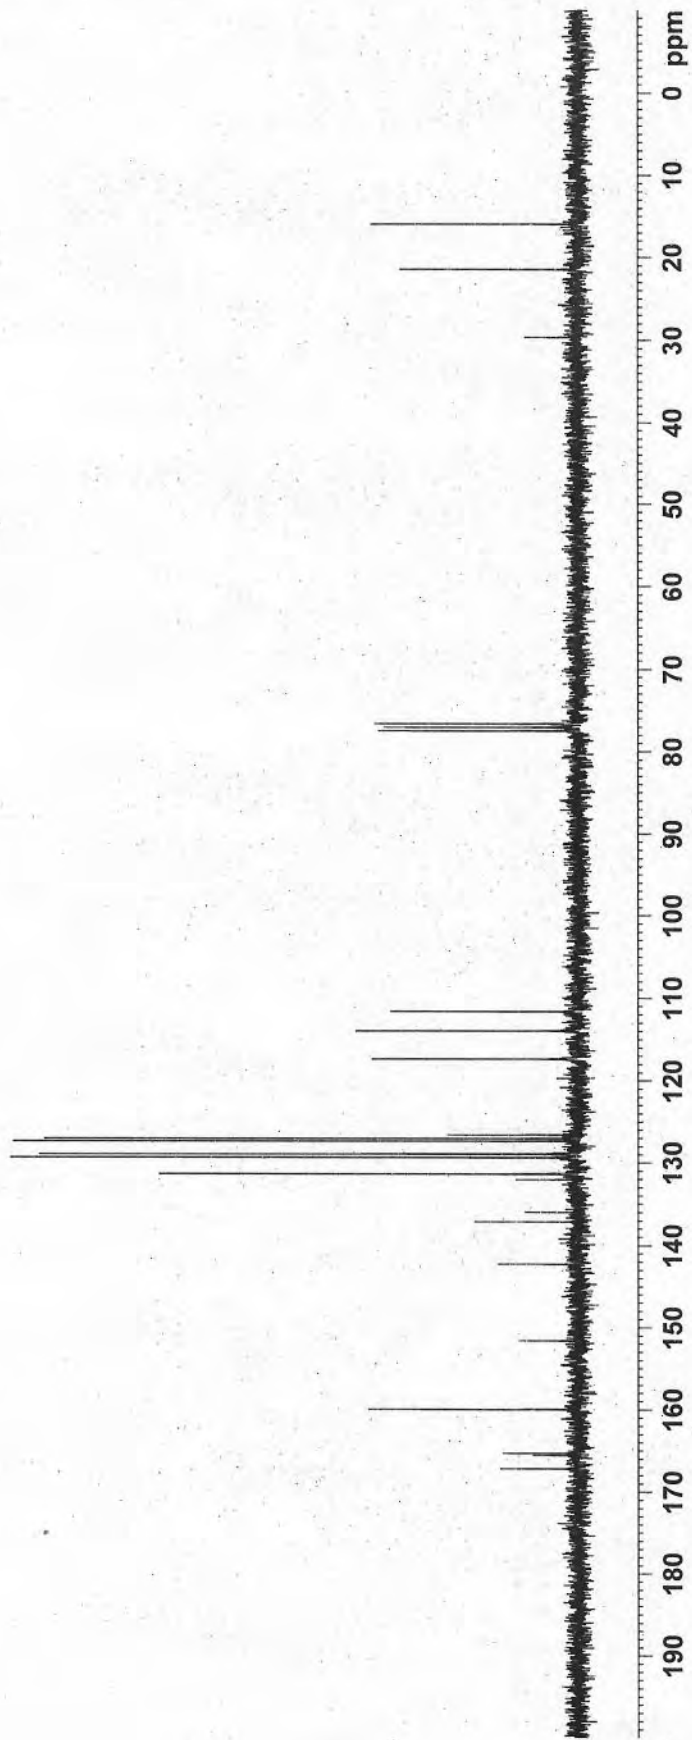

B4

SP121202-2 1HNMR CDCL3 303K AV-300

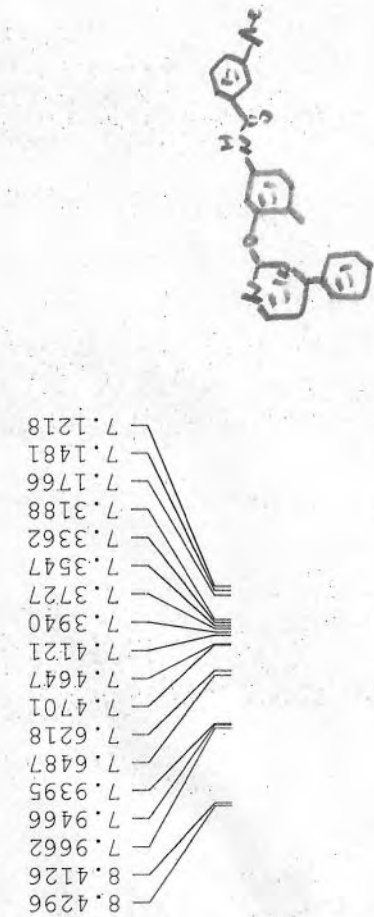

- 8.4296
- 8.4126
- 7.9662
- 7.9466
- 7.9395
- 7.6487
- 7.6218
- 7.4701
- 7.4647
- 7.4121
- 7.3940
- 7.3727
- 7.3547
- 7.3362
- 7.3188
- 7.1766
- 7.1481
- 7.1218

- 2.2944
- 2.0931

- 0.0000
- 0.0798

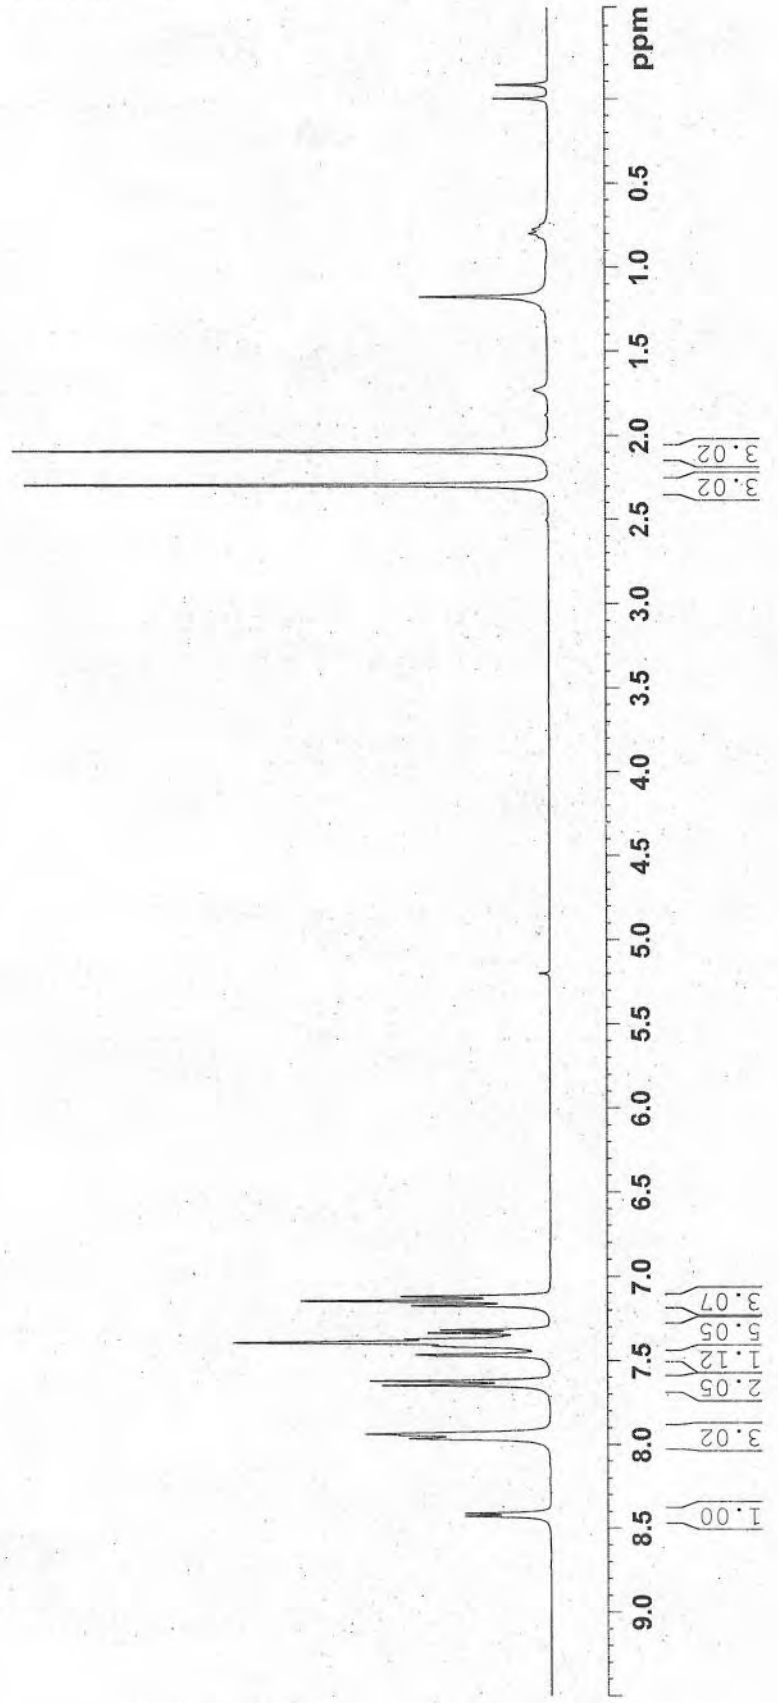

|                    |                     |                               |         |                        |                      |
|--------------------|---------------------|-------------------------------|---------|------------------------|----------------------|
| <b>Sample Name</b> |                     | <b>Position</b>               | p2F3    | <b>Instrument Name</b> | Instrument 1         |
| <b>User Name</b>   | QTOF-PC\QTOF        | <b>Inj Vol</b>                | 0.1     | <b>InjPosition</b>     |                      |
| <b>Sample Type</b> | Sample              | <b>IRM Calibration Status</b> | Success | <b>Data Filename</b>   | B4-p.d               |
| <b>ACQ Method</b>  | 20110418-MSonly-p.m | <b>Comment</b>                |         | <b>Acquired Time</b>   | 3/12/2018 3:34:31 PM |

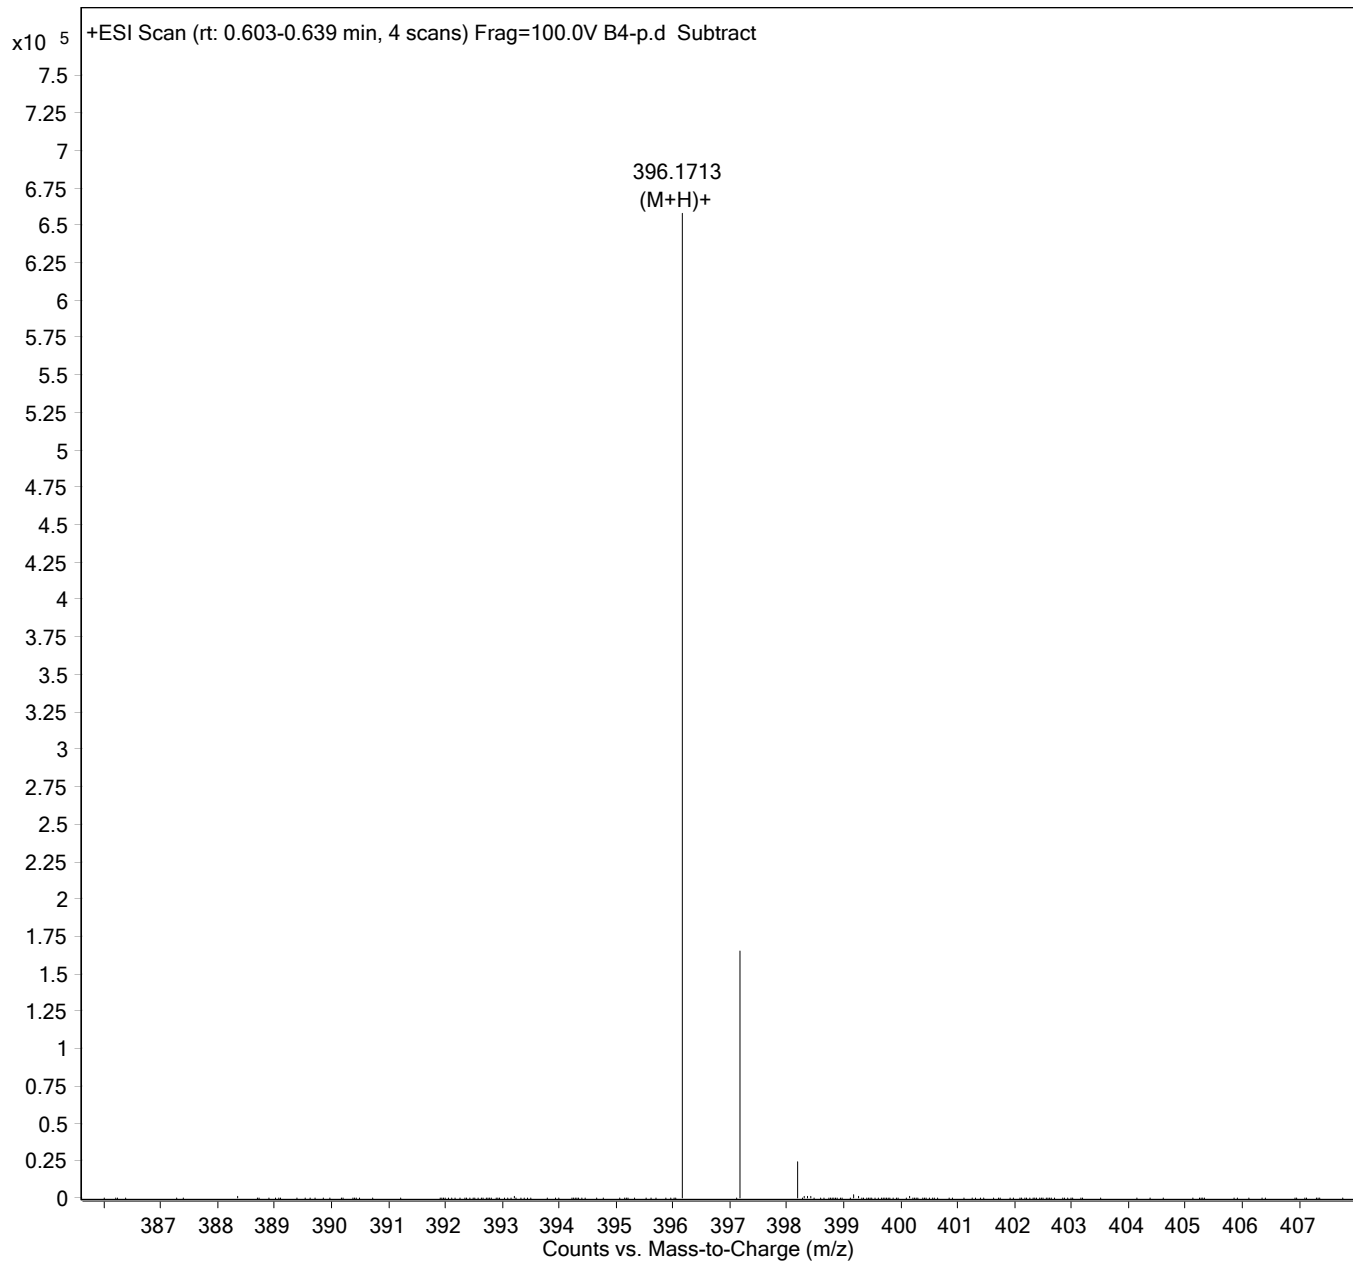

SP121212-2 CDCl<sub>3</sub> 303K C13-NMR AV300

167.147  
165.468  
165.262  
159.892  
151.500  
137.418  
135.895  
131.384  
131.275  
129.056  
128.914  
127.347  
127.042  
126.324  
117.597  
114.118  
113.760  
111.655

77.606  
77.180  
76.756

55.374

15.978

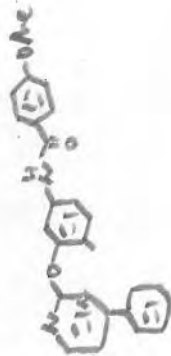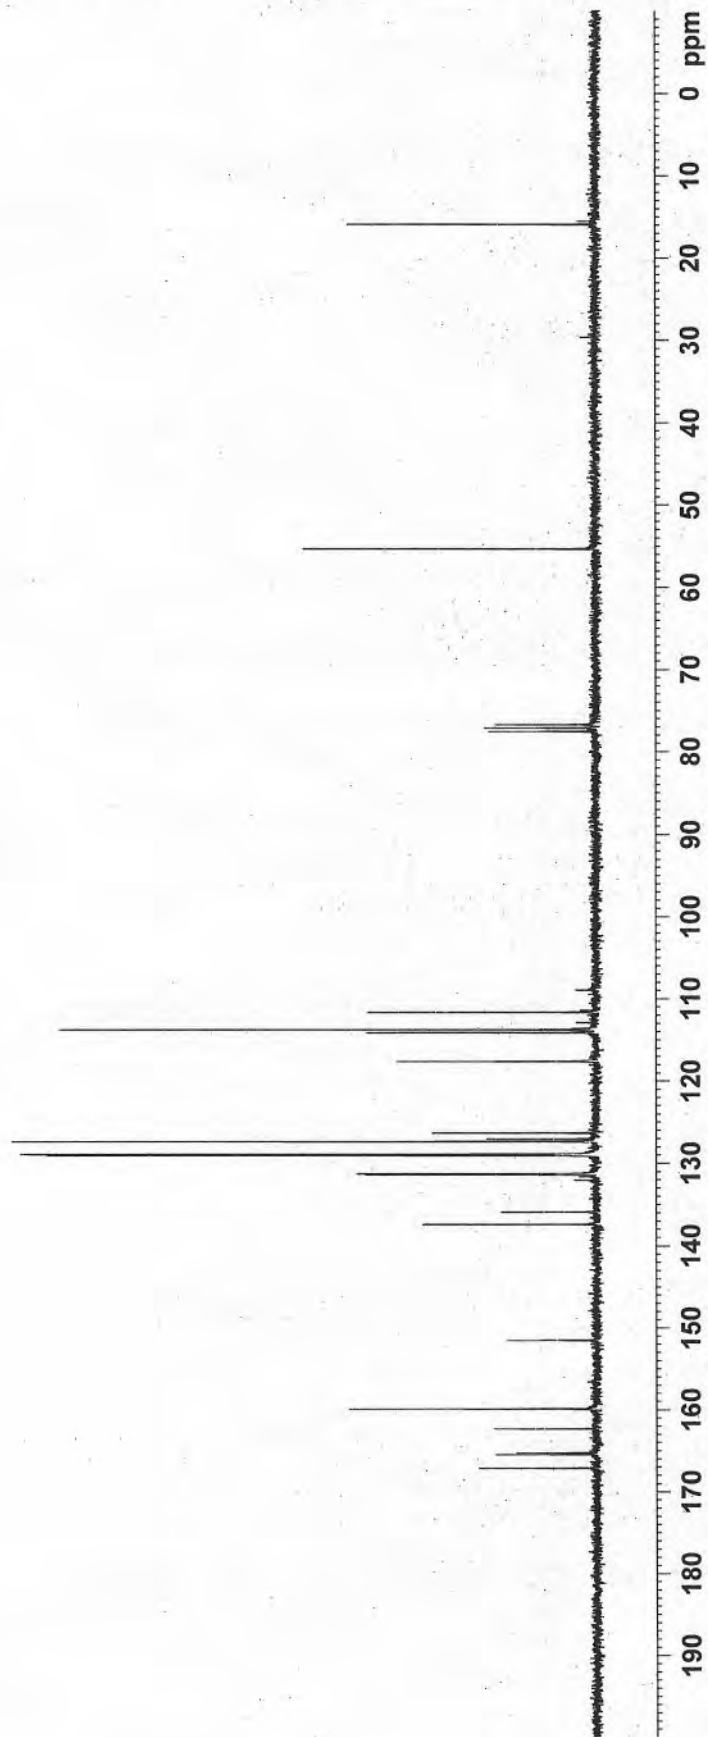

B5.

SP121212-2 1H-NMR CDCI3 303K AV-300

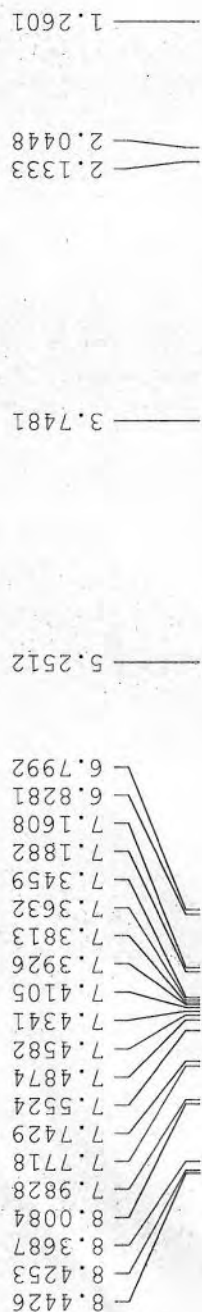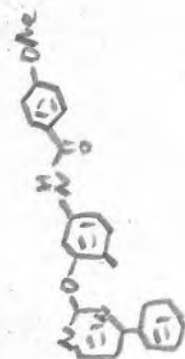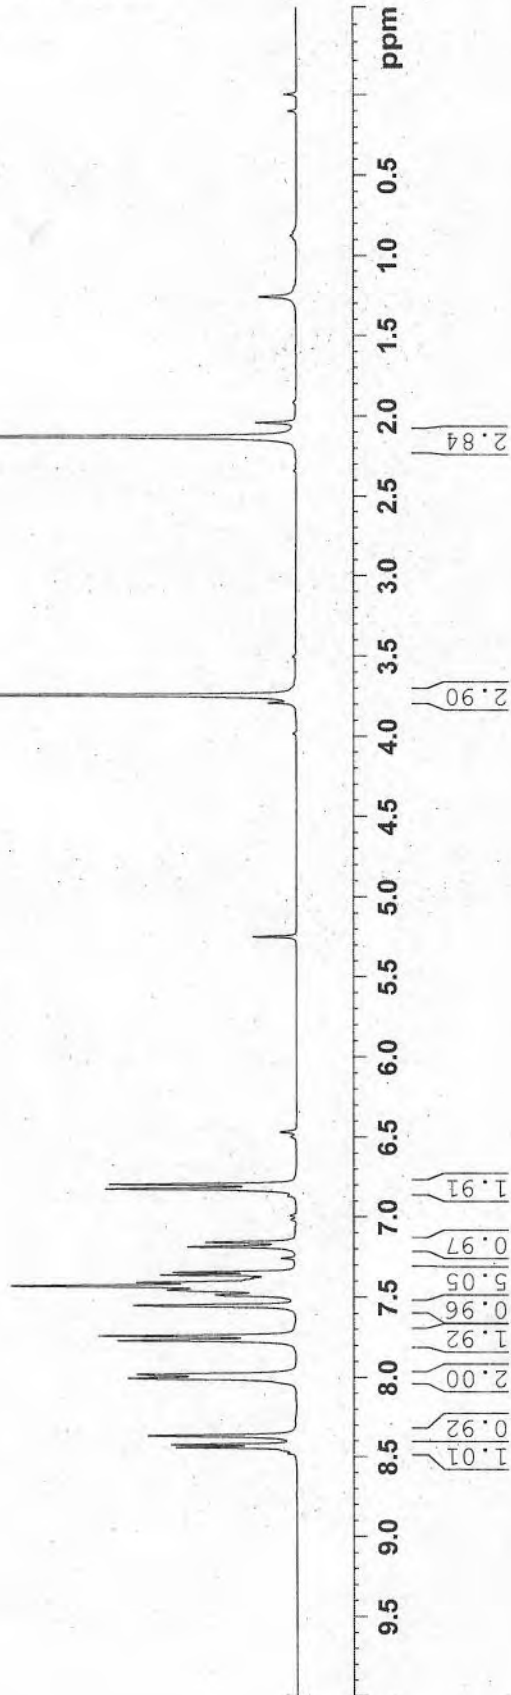



|                    |                     |                               |         |                        |                      |
|--------------------|---------------------|-------------------------------|---------|------------------------|----------------------|
| <b>Sample Name</b> |                     | <b>Position</b>               | p2F4    | <b>Instrument Name</b> | Instrument 1         |
| <b>User Name</b>   | QTOF-PC\QTOF        | <b>Inj Vol</b>                | 0.1     | <b>InjPosition</b>     |                      |
| <b>Sample Type</b> | Sample              | <b>IRM Calibration Status</b> | Success | <b>Data Filename</b>   | B5-p.d               |
| <b>ACQ Method</b>  | 20110418-MSonly-p.m | <b>Comment</b>                |         | <b>Acquired Time</b>   | 3/12/2018 3:36:31 PM |

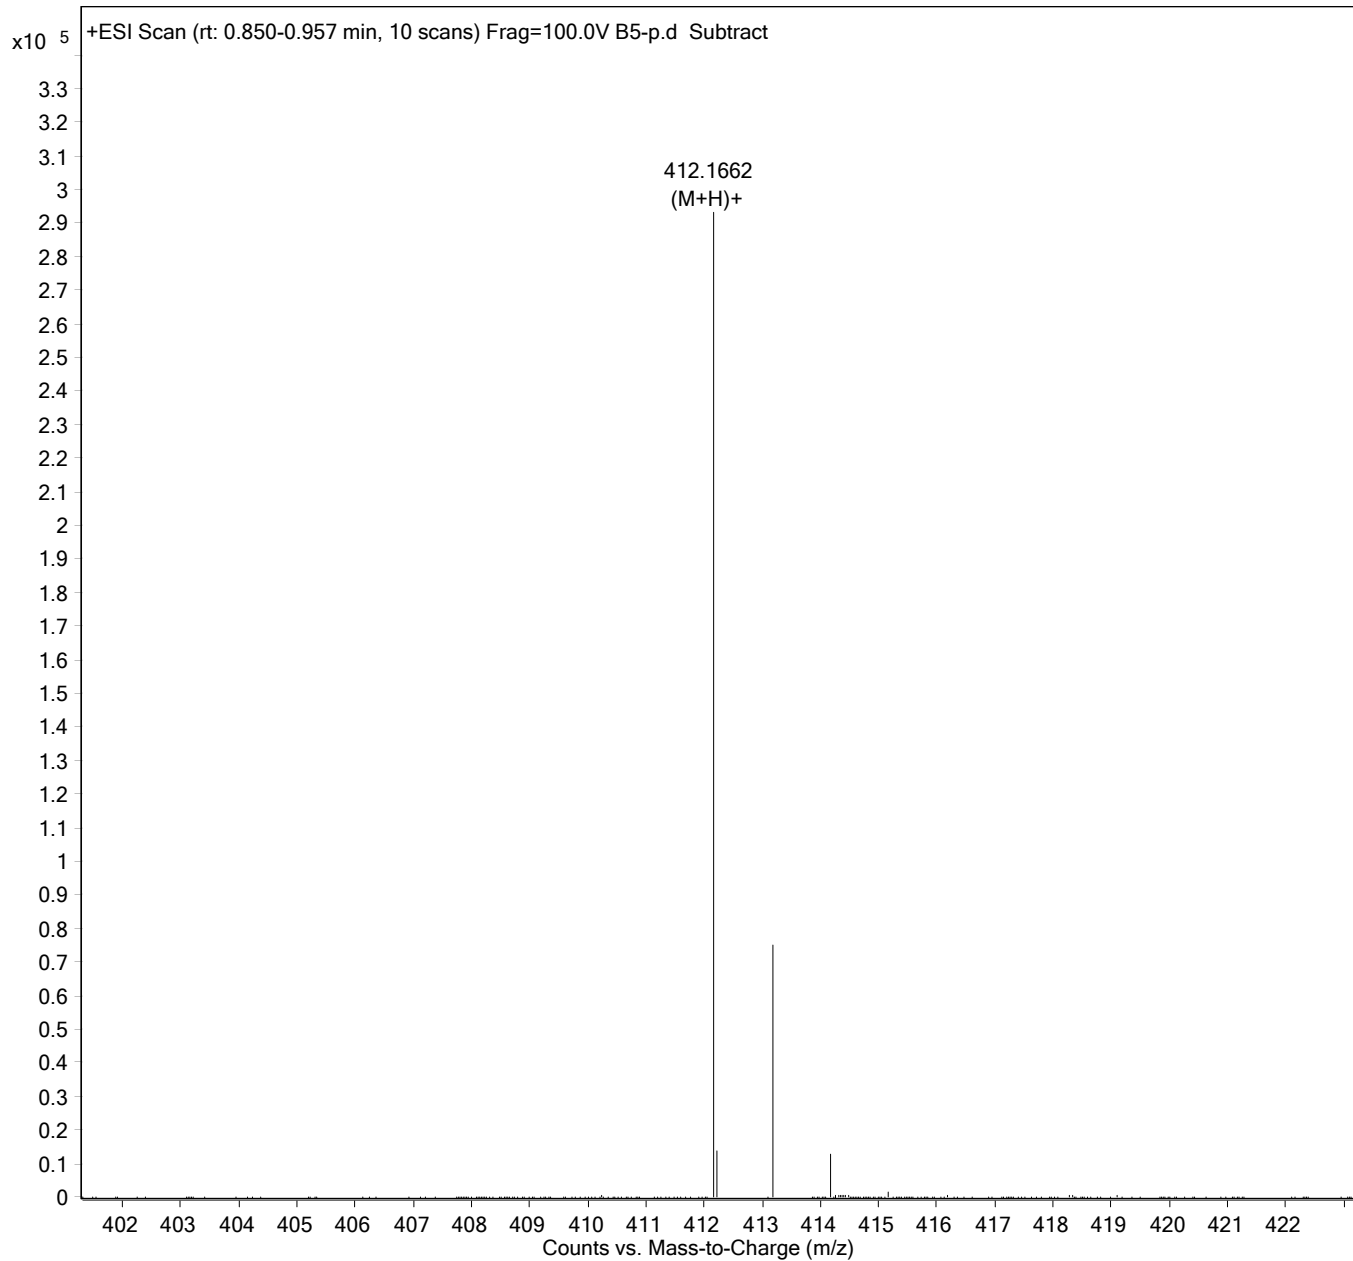

SPI40506-1-C C13-NMR CDCL3 303K AV-300

167.240  
165.250  
164.611  
159.926  
151.602  
138.021  
136.755  
135.909  
133.271  
131.431  
128.930  
128.507  
127.349  
127.040  
117.476  
114.107  
111.672

77.460  
77.037  
76.612

16.002

B6

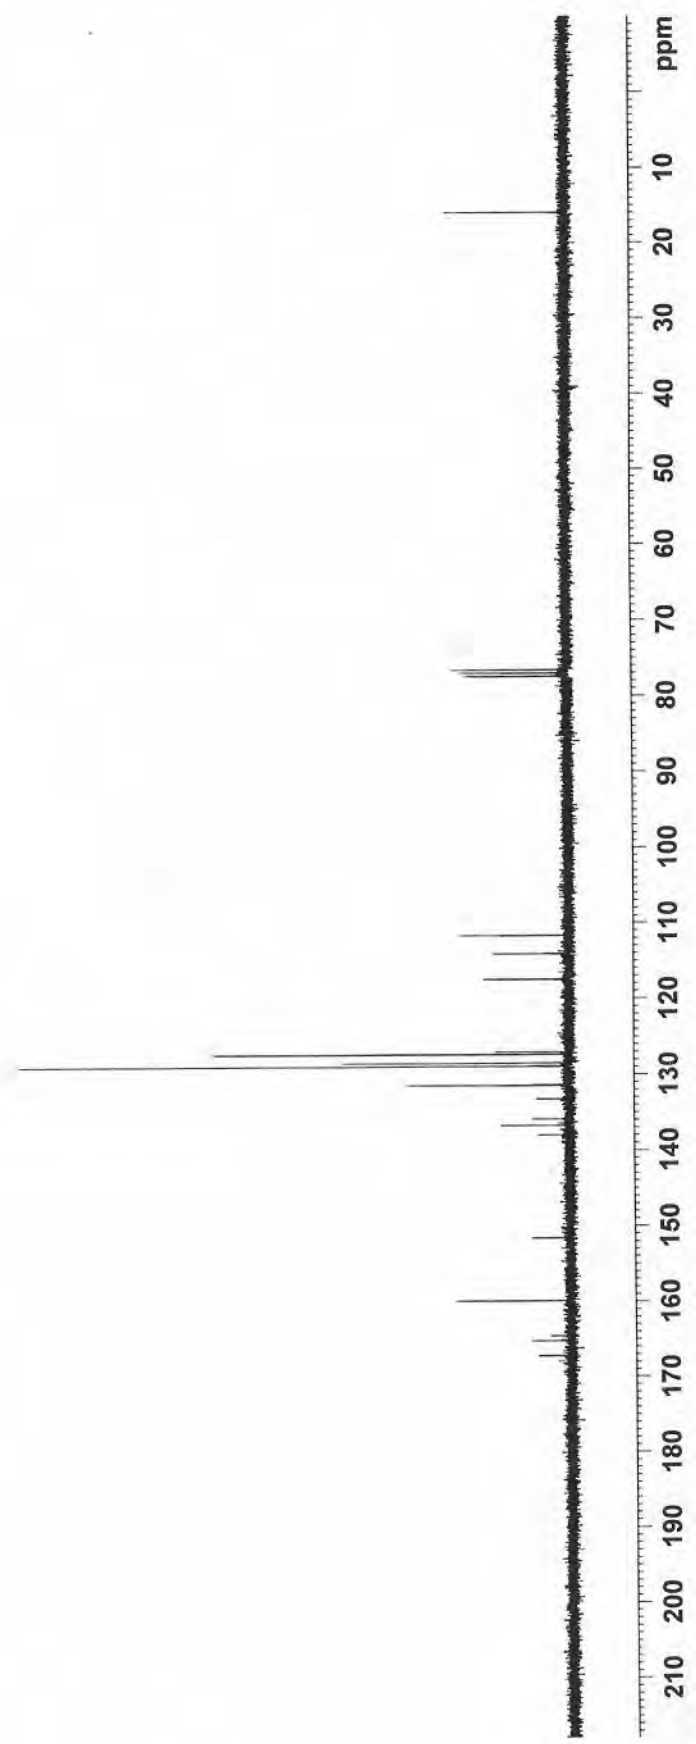

SP20131108-4 CDCL3 1HNMR AV300

0.0718  
-0.0003

8.5394  
8.5220  
8.0584  
8.0535  
8.0342  
8.0272  
7.8795  
7.7867  
7.7584  
7.5296  
7.4900  
7.4671  
7.4548  
7.4404  
7.4373  
7.4238  
7.4085  
7.2895  
7.2603

2.1945

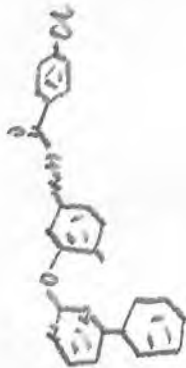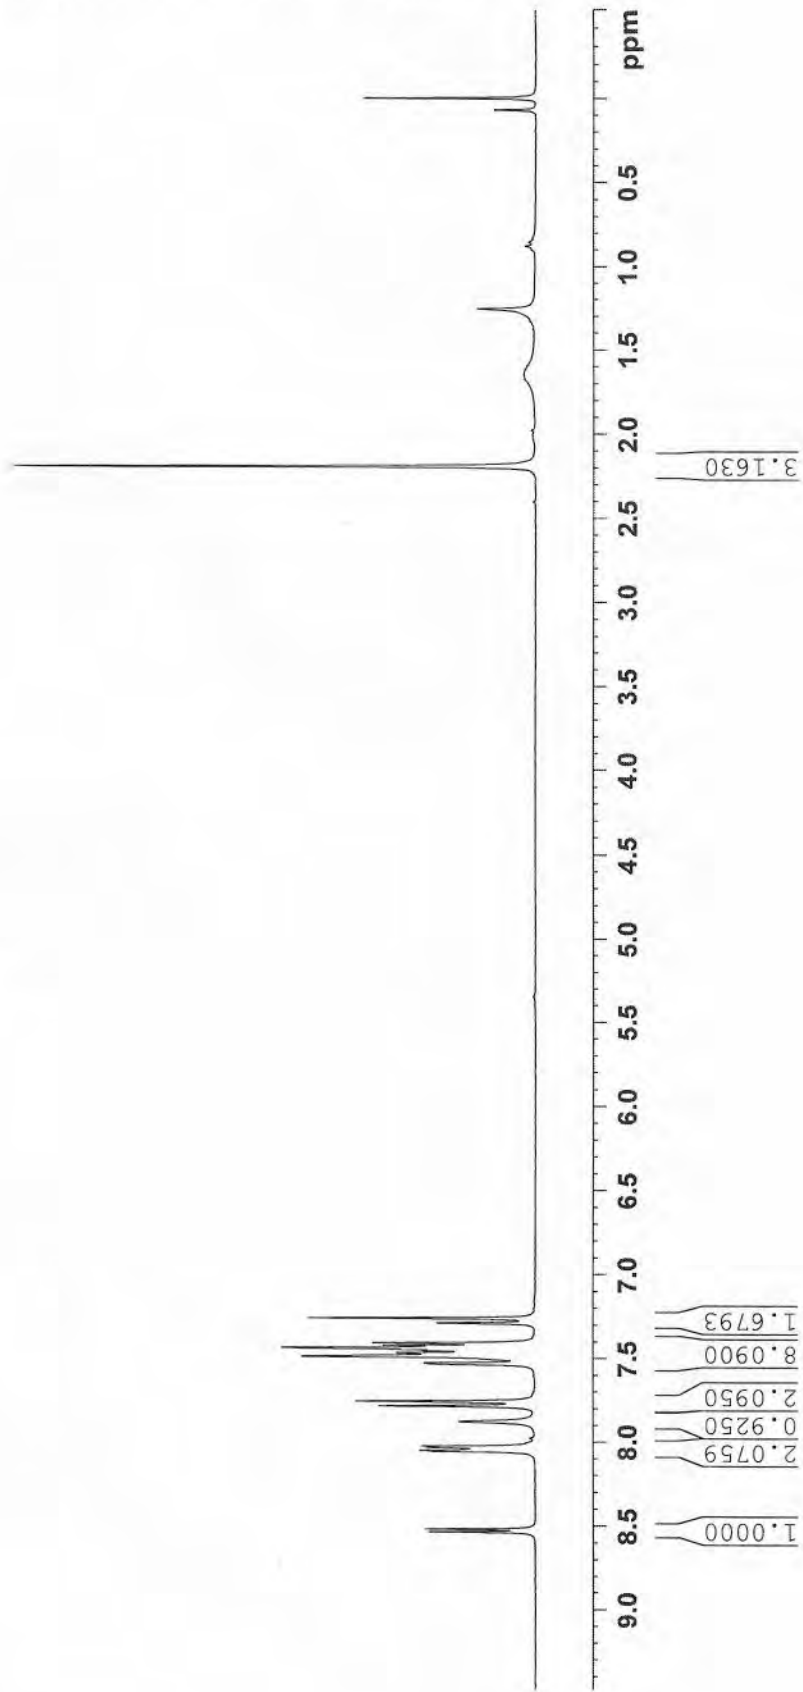

B6

|                    |                     |                               |         |                        |                      |
|--------------------|---------------------|-------------------------------|---------|------------------------|----------------------|
| <b>Sample Name</b> |                     | <b>Position</b>               | p2F5    | <b>Instrument Name</b> | Instrument 1         |
| <b>User Name</b>   | QTOF-PC\QTOF        | <b>Inj Vol</b>                | 0.1     | <b>InjPosition</b>     |                      |
| <b>Sample Type</b> | Sample              | <b>IRM Calibration Status</b> | Success | <b>Data Filename</b>   | B6-p.d               |
| <b>ACQ Method</b>  | 20110418-MSonly-p.m | <b>Comment</b>                |         | <b>Acquired Time</b>   | 3/12/2018 3:39:16 PM |

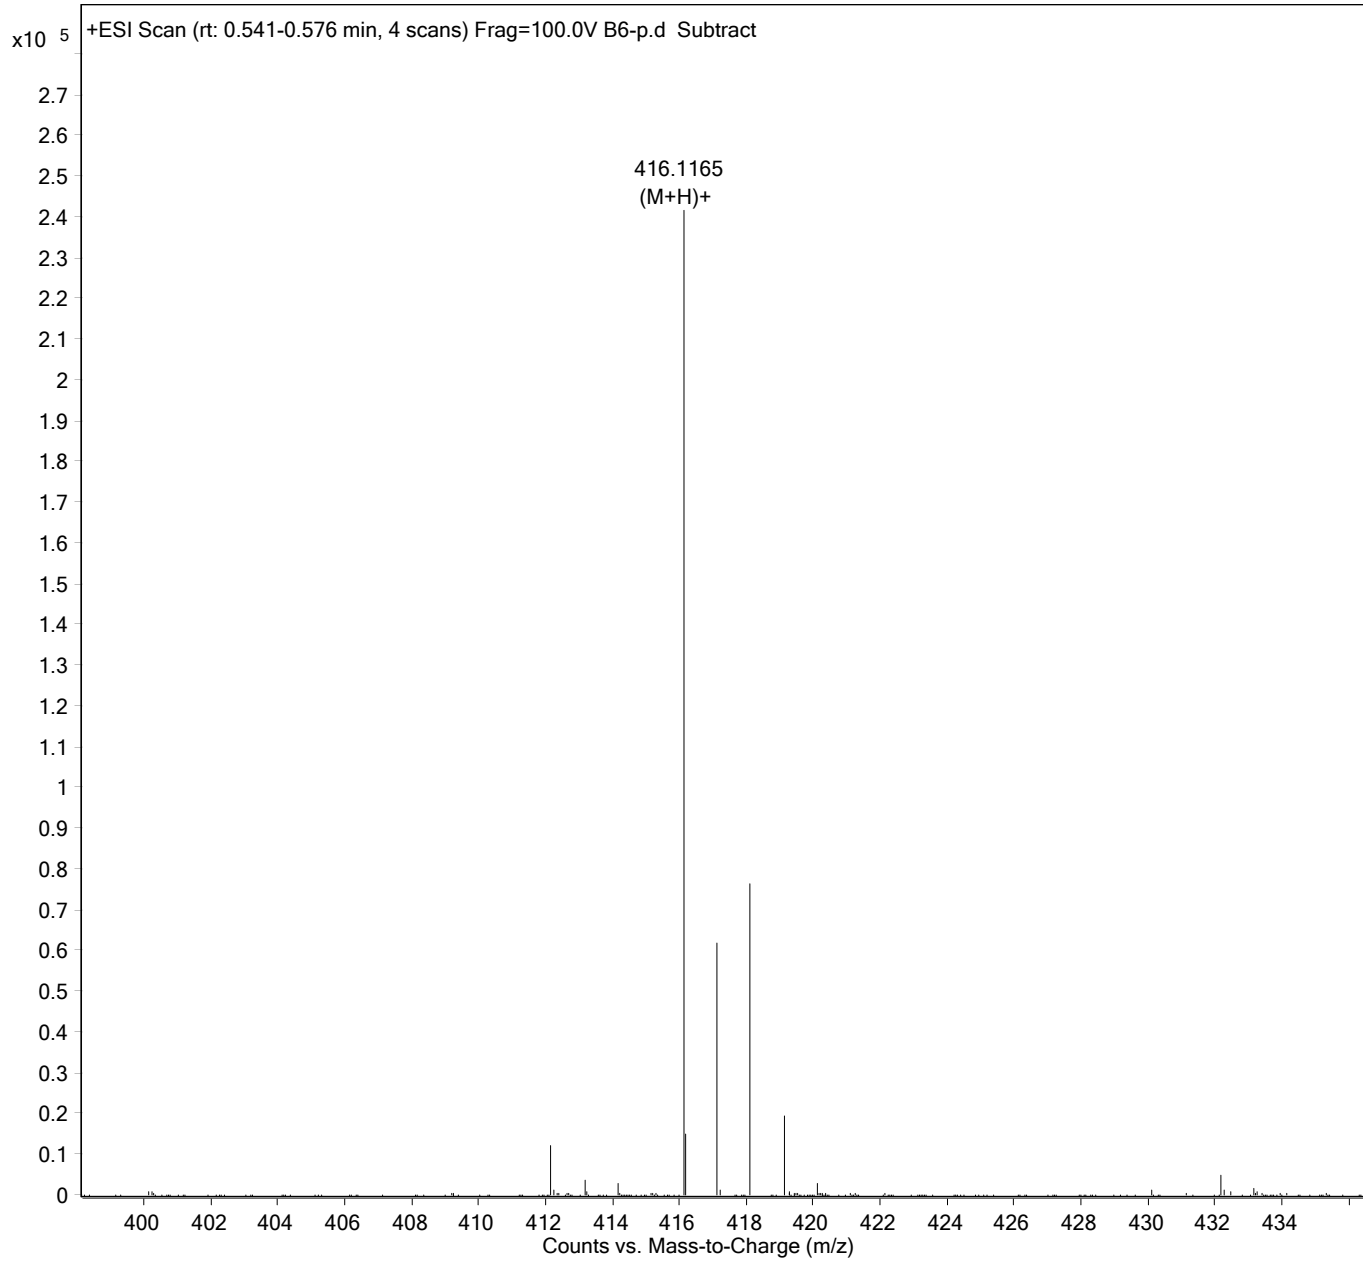

B7

SP121205-3 CDCl<sub>3</sub> 303K C13-NMR AV300

167.191  
165.149  
164.899  
159.817  
151.414  
137.052  
136.653  
135.762  
134.512  
131.525  
131.460  
131.334  
129.784  
128.922  
127.540  
127.331  
126.849  
125.380  
117.867  
114.374  
111.780

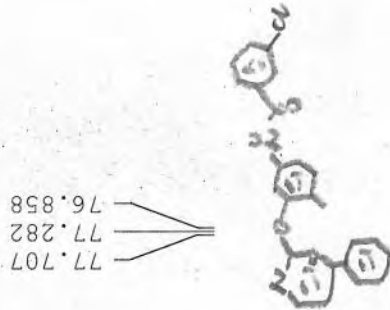

77.707  
77.282  
76.858

15.982

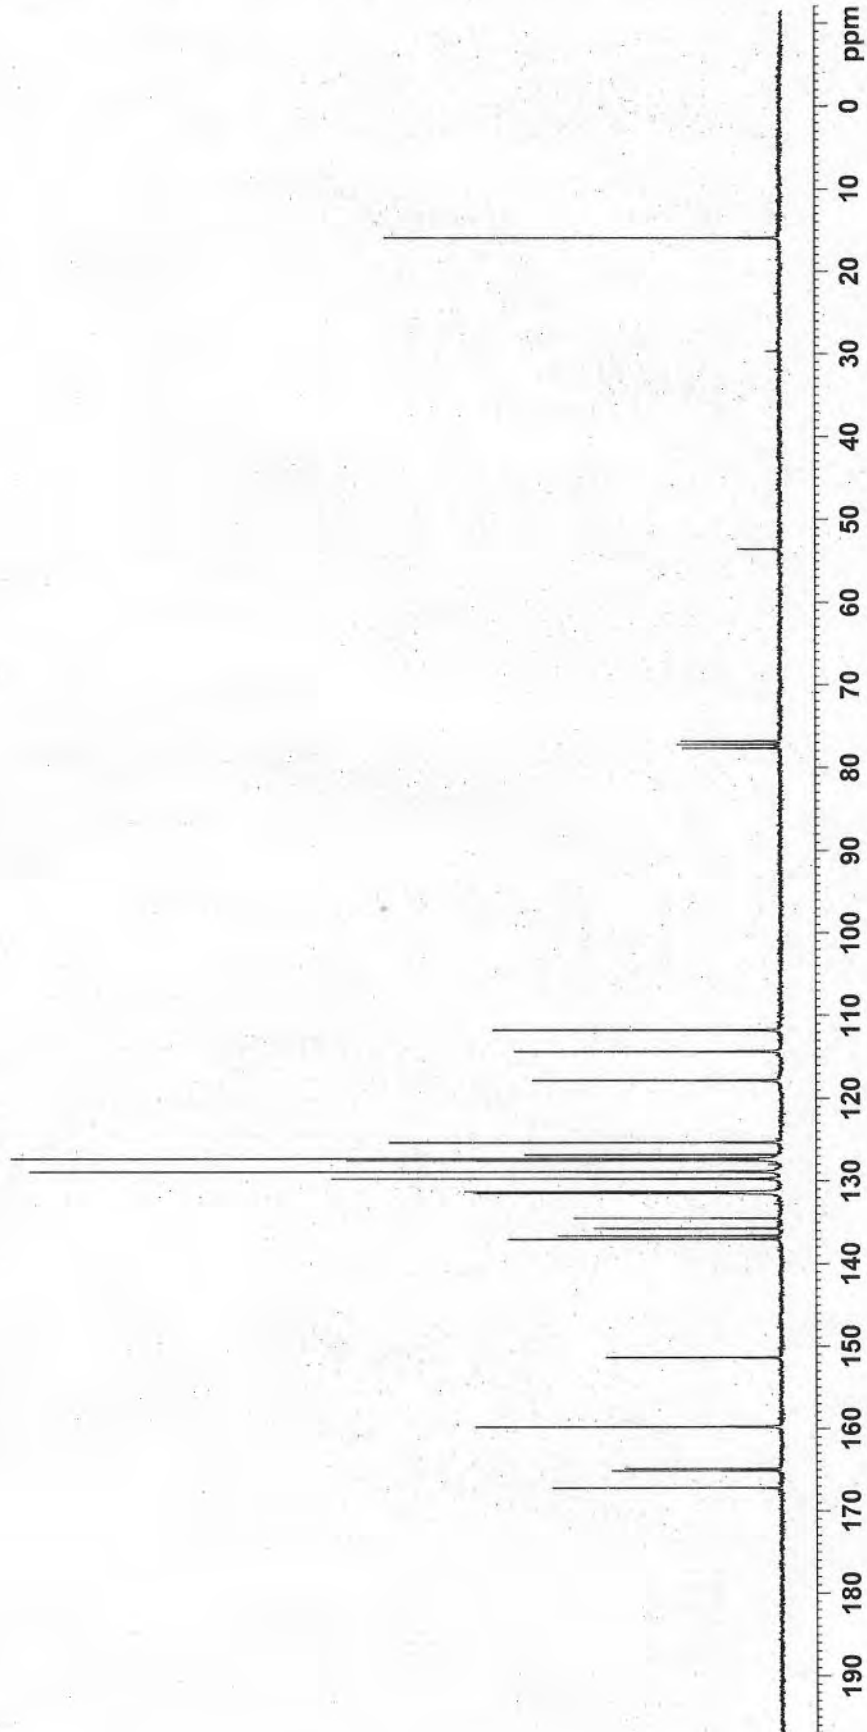

SP121205-3 1H-NMR CDCl3 303K AV-300

8.9183  
8.4026  
8.3853  
7.9682  
7.9461  
7.7069  
7.6103  
7.5845  
7.5499  
7.5096  
7.4822  
7.4267  
7.4030  
7.3779  
7.3446  
7.3264  
7.2908  
7.1984  
7.1723  
7.1476  
7.1210

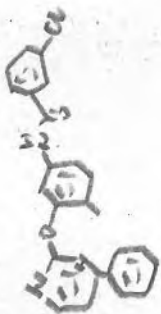

2.0858  
0.0002

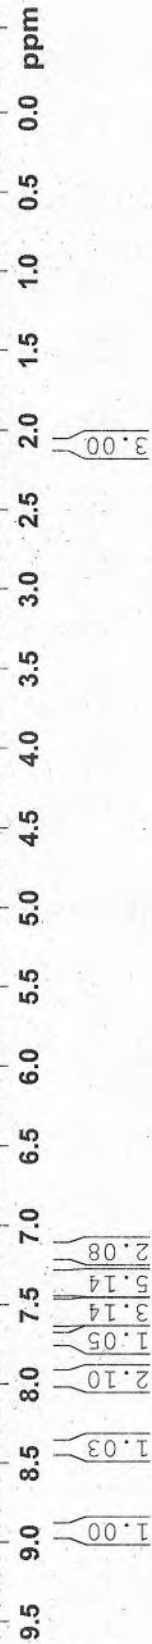

B7

|                    |                    |                               |         |                        |                      |
|--------------------|--------------------|-------------------------------|---------|------------------------|----------------------|
| <b>Sample Name</b> |                    | <b>Position</b>               | p2F6    | <b>Instrument Name</b> | Instrument 1         |
| <b>User Name</b>   | QTOF-PC\QTOF       | <b>Inj Vol</b>                | 0.1     | <b>InjPosition</b>     |                      |
| <b>Sample Type</b> | Sample             | <b>IRM Calibration Status</b> | Success | <b>Data Filename</b>   | B7-p.d               |
| <b>ACQ Method</b>  | 20110418-MOnly-p.m | <b>Comment</b>                |         | <b>Acquired Time</b>   | 3/12/2018 3:41:26 PM |

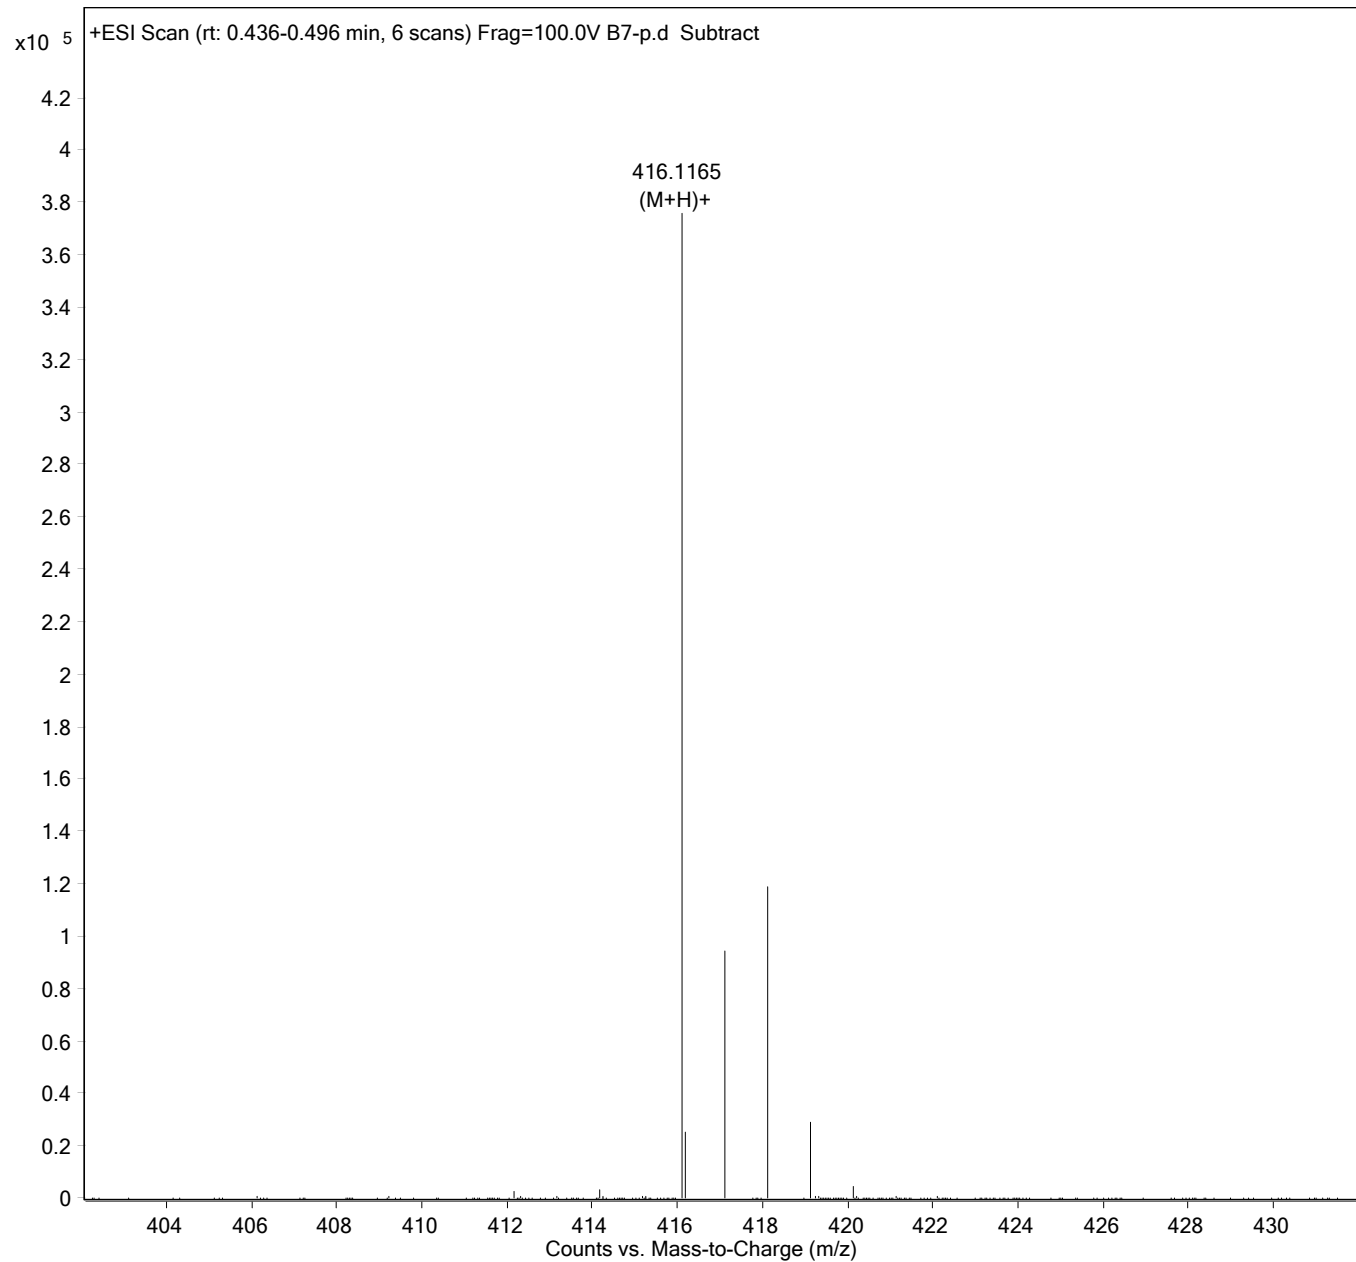

B8

SP121202-3 CDCl3 303K C13-NMR AV300

167.313  
165.107  
163.865  
159.878  
151.526  
149.547  
140.414  
136.441  
135.722  
131.539  
128.965  
128.382  
127.324  
123.802  
117.756  
114.343  
111.816

77.485  
77.062  
76.639

16.031

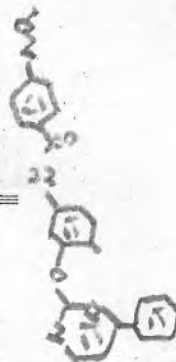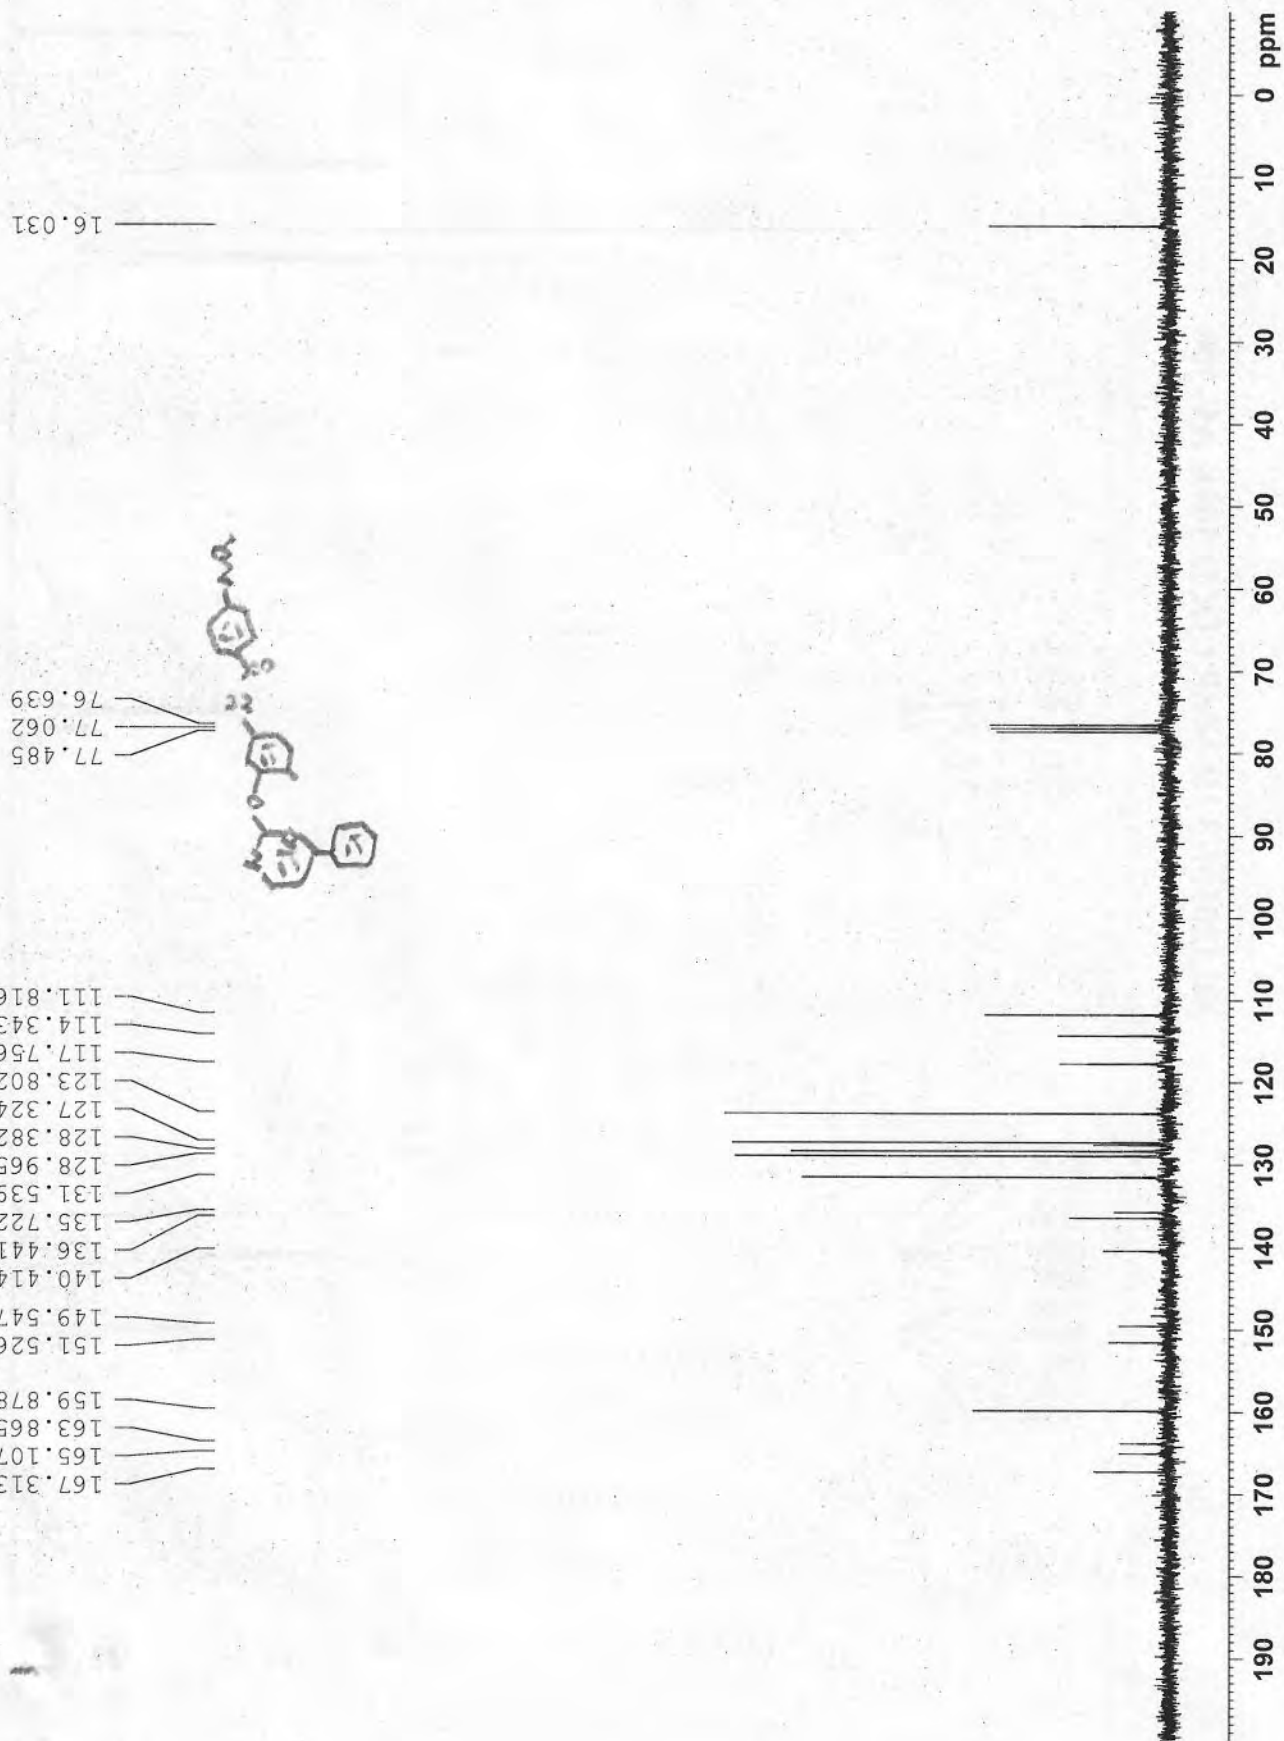



SP140506-2 CDCL3 1HNMR AV300

0.0052

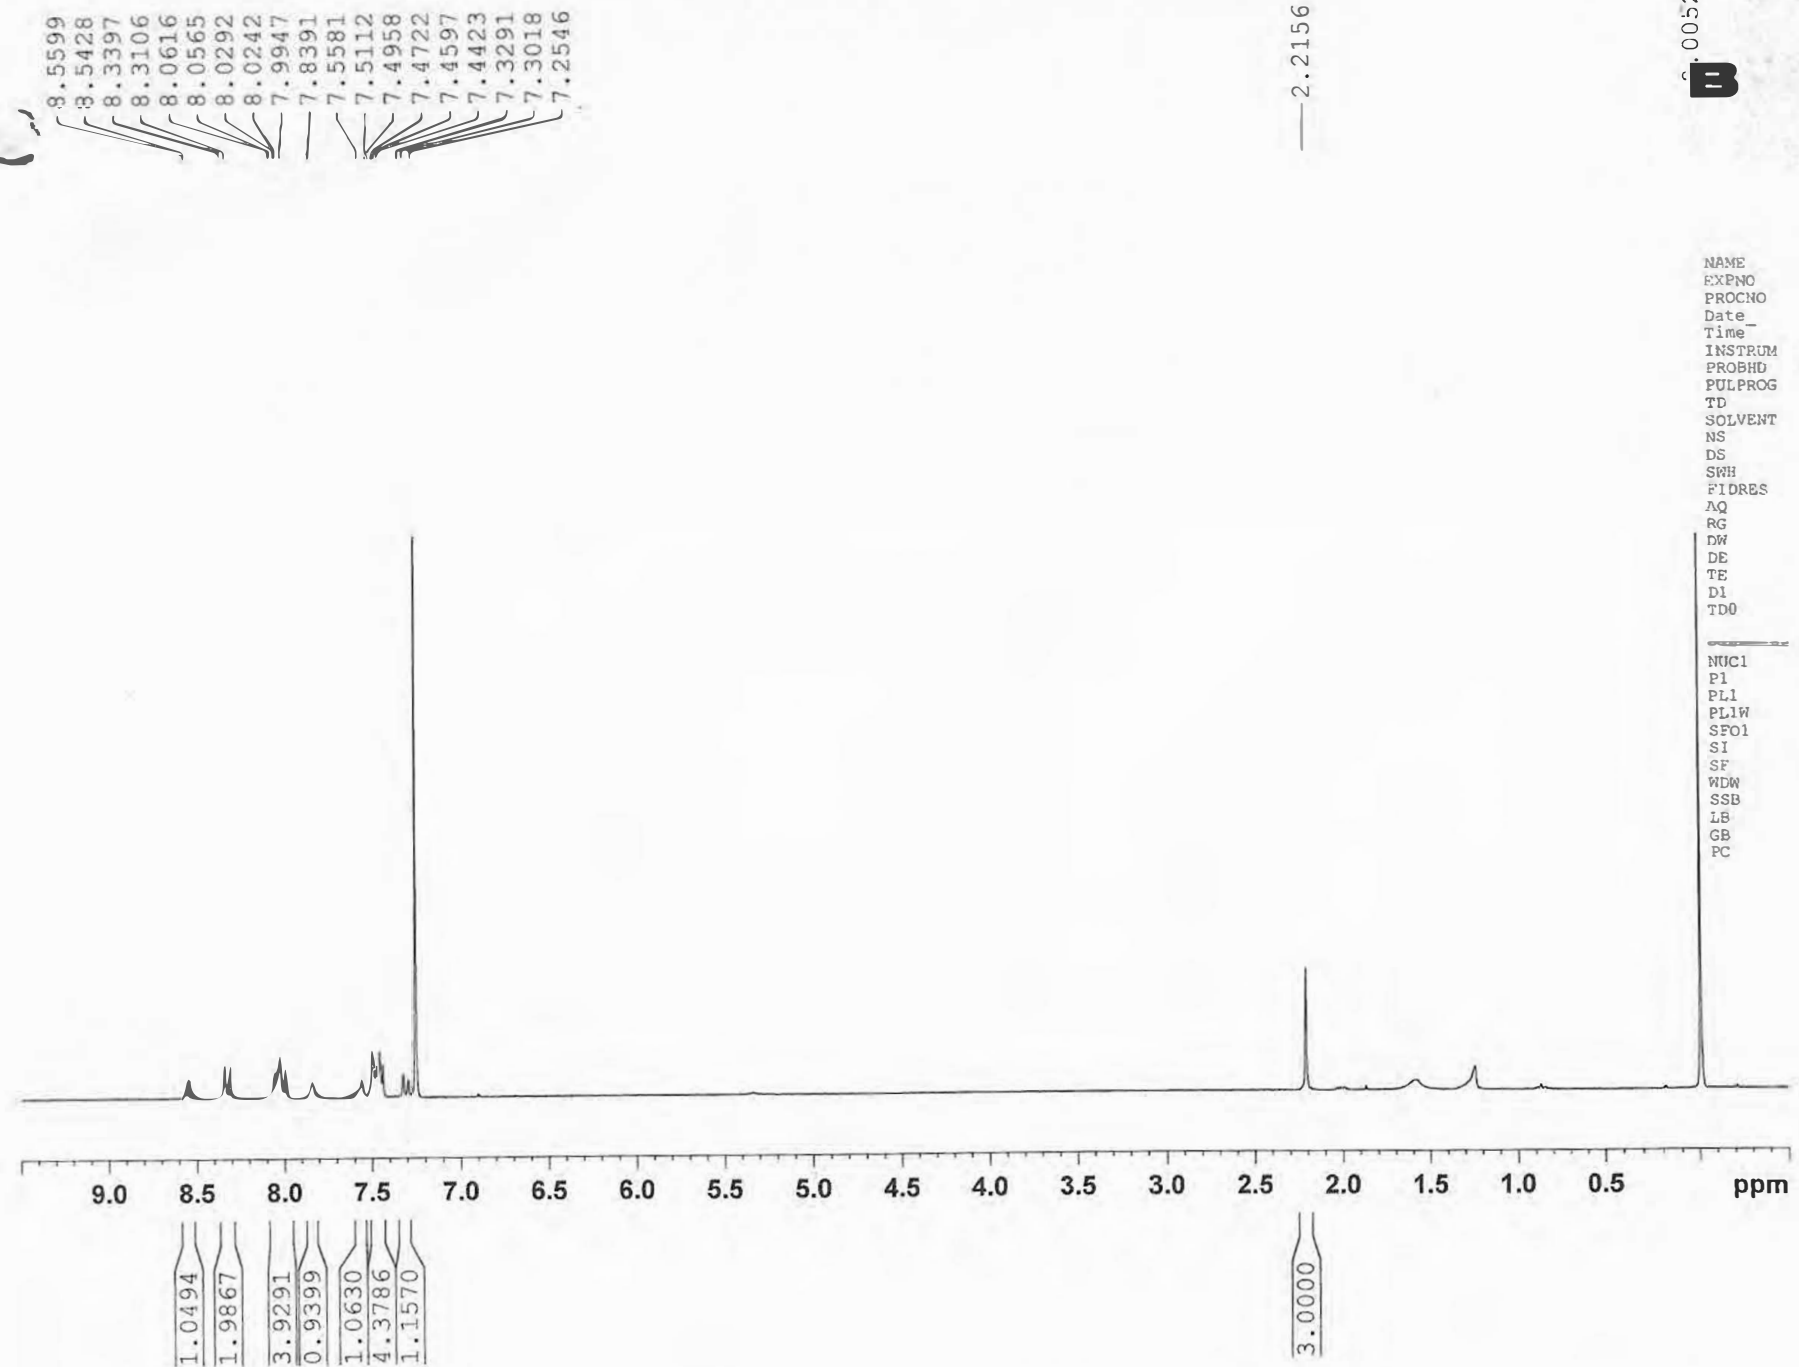

|                    |                     |                               |         |                        |                      |
|--------------------|---------------------|-------------------------------|---------|------------------------|----------------------|
| <b>Sample Name</b> |                     | <b>Position</b>               | p2F7    | <b>Instrument Name</b> | Instrument 1         |
| <b>User Name</b>   | QTOF-PC\QTOF        | <b>Inj Vol</b>                | 0.1     | <b>InjPosition</b>     |                      |
| <b>Sample Type</b> | Sample              | <b>IRM Calibration Status</b> | Success | <b>Data Filename</b>   | B8-p.d               |
| <b>ACQ Method</b>  | 20110418-MSonly-p.m | <b>Comment</b>                |         | <b>Acquired Time</b>   | 3/12/2018 3:43:49 PM |

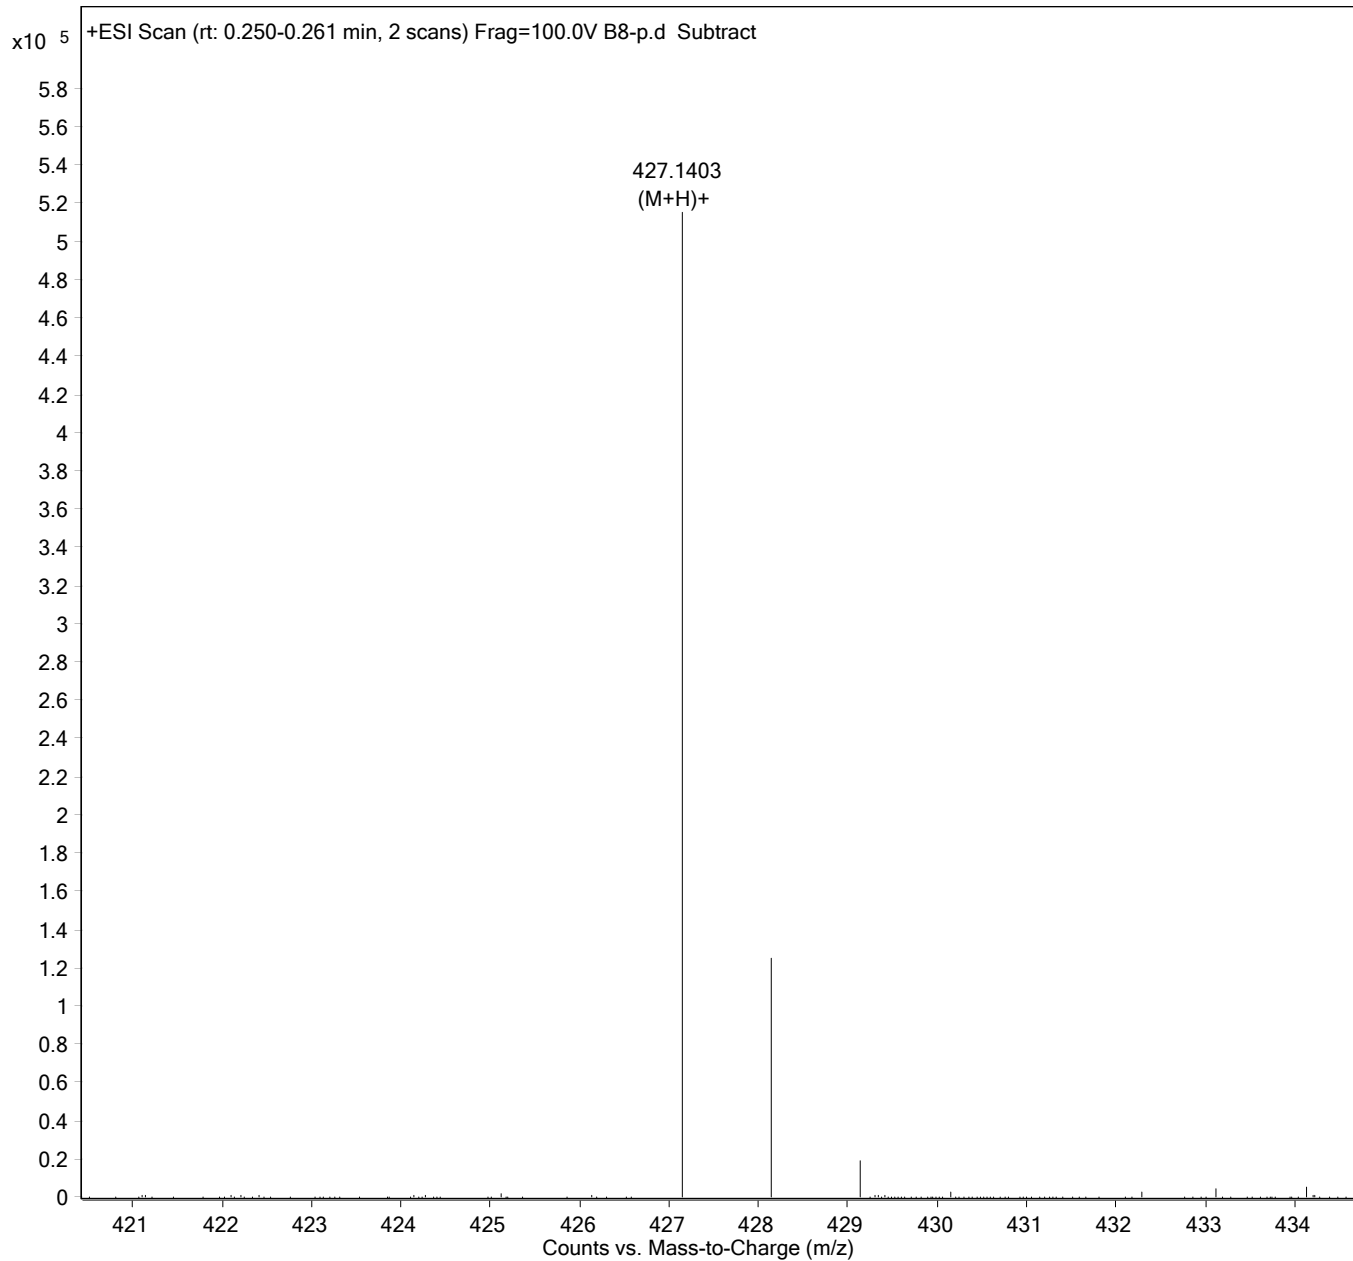

69

SP130828-C C13-NMR CDCL3 303K AV-300

167.273  
165.164  
163.369  
159.888  
151.545  
148.103  
136.475  
135.803  
133.448  
131.468  
129.892  
128.926  
127.460  
127.316  
126.170  
121.946  
117.765  
114.367  
111.761

77.457  
77.034  
76.610

15.954

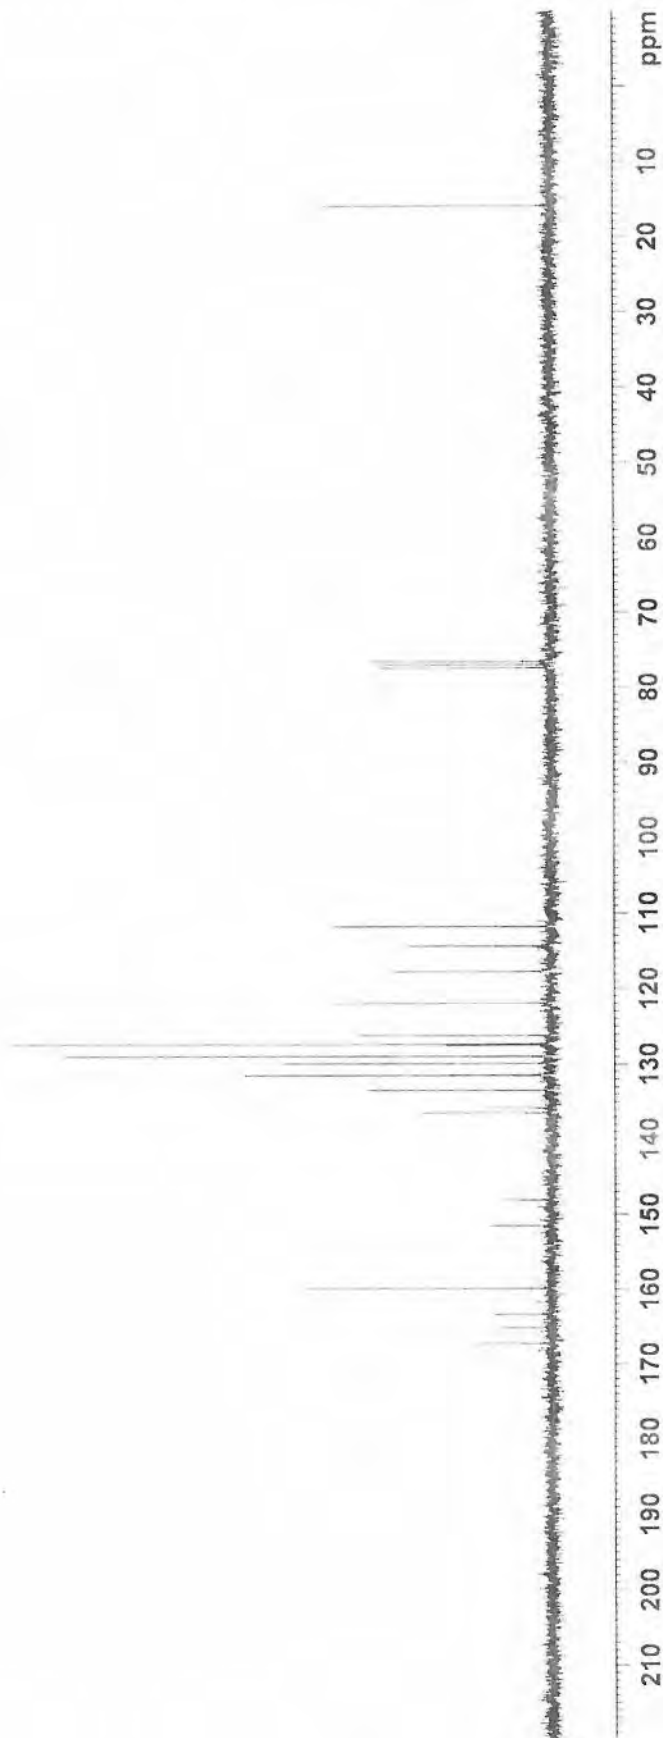



|                    |                    |                               |         |                        |                      |
|--------------------|--------------------|-------------------------------|---------|------------------------|----------------------|
| <b>Sample Name</b> |                    | <b>Position</b>               | p2F8    | <b>Instrument Name</b> | Instrument 1         |
| <b>User Name</b>   | QTOF-PC\QTOF       | <b>Inj Vol</b>                | 0.1     | <b>InjPosition</b>     |                      |
| <b>Sample Type</b> | Sample             | <b>IRM Calibration Status</b> | Success | <b>Data Filename</b>   | B9-p.d               |
| <b>ACQ Method</b>  | 20110418-MOnly-p.m | <b>Comment</b>                |         | <b>Acquired Time</b>   | 3/12/2018 3:45:31 PM |

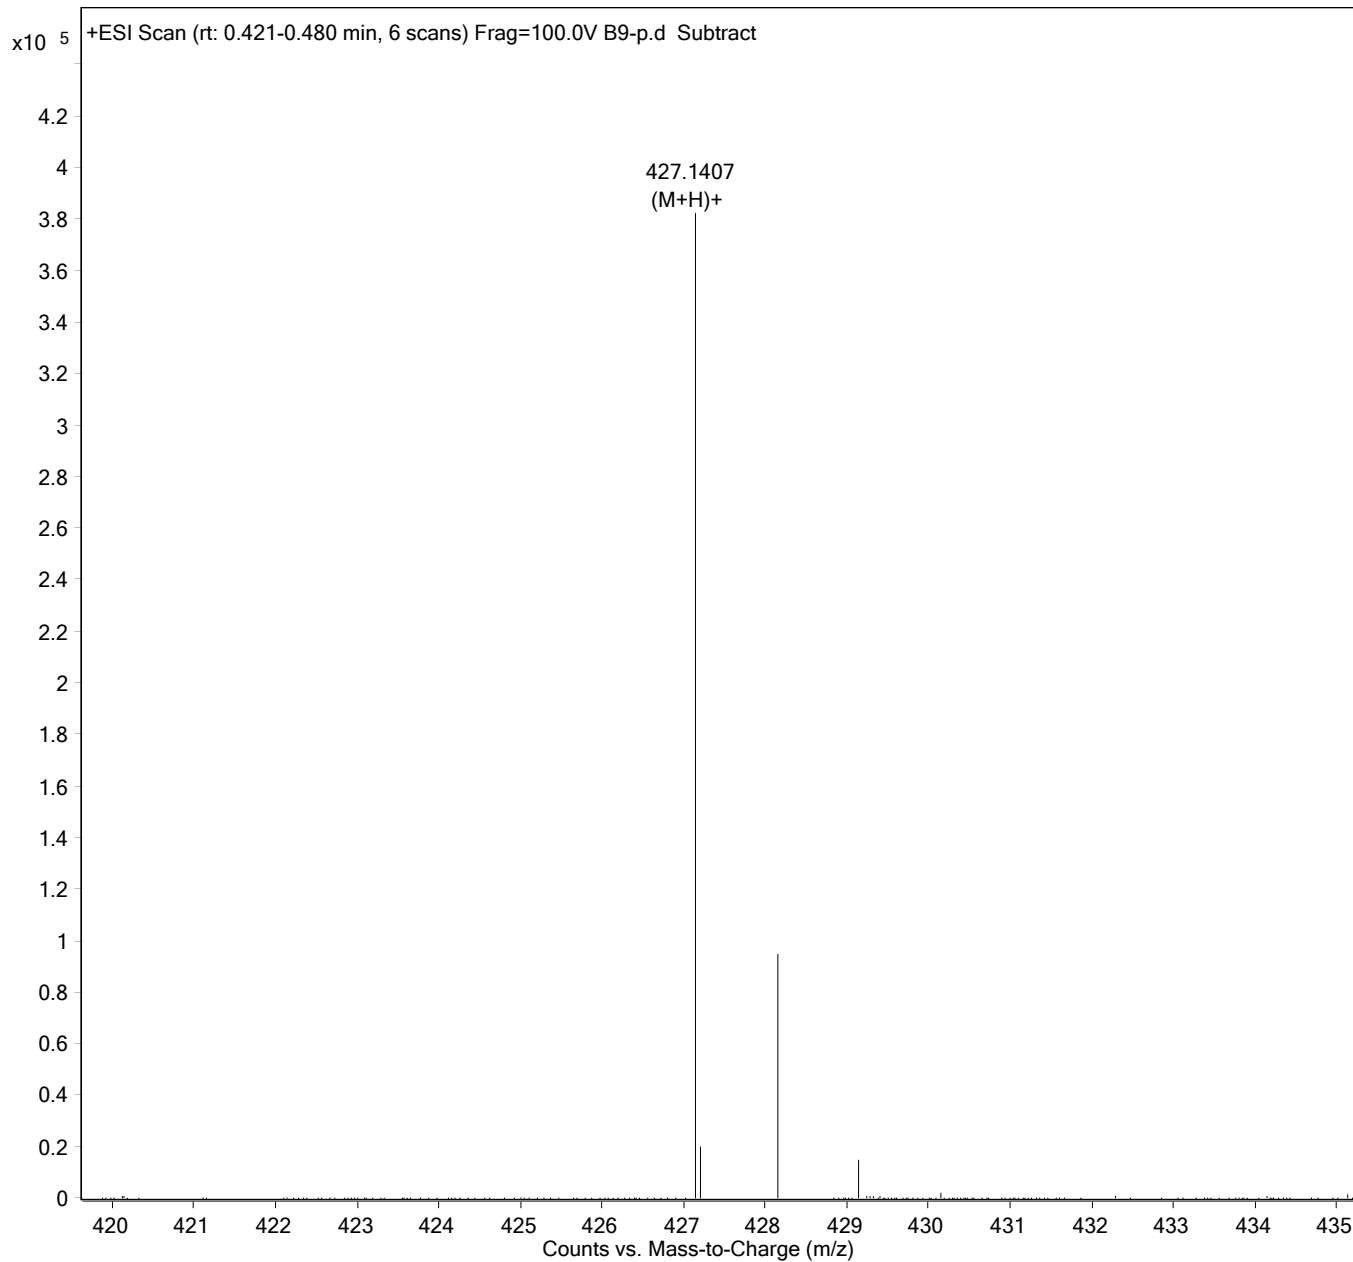

SP20131108-3-C C13-NMR CDCL3 303K AV-300

167.226  
 166.537  
 159.975  
 151.643  
 136.786  
 135.950  
 131.432  
 131.394  
 129.459  
 129.341  
 128.931  
 127.349  
 126.994  
 117.389  
 115.945  
 115.653  
 114.063  
 111.648

77.442  
 77.017  
 76.595

16.003

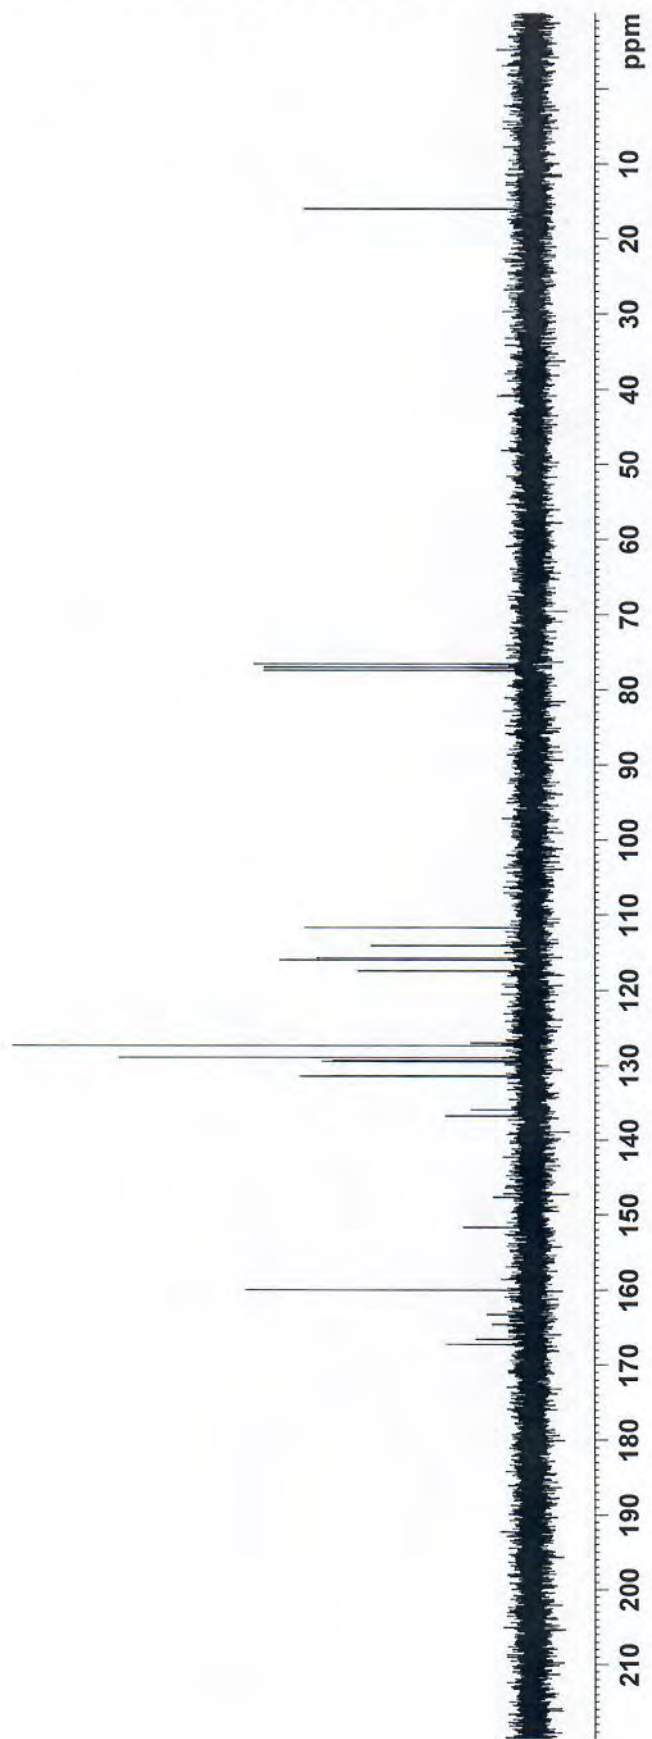

B10

SP20131108-3 CDCL3 1HNMR AV300

0.0734  
-0.0003

8.5129  
8.0563  
8.0517  
8.0323  
8.0254  
7.9145  
7.8648  
7.8472  
7.8360  
7.8184  
7.5259  
7.5018  
7.4864  
7.4639  
7.4358  
7.4184  
7.2814  
7.2603  
7.1449  
7.1165  
7.0879

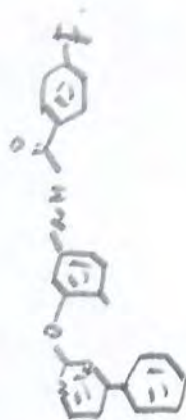

2.1889

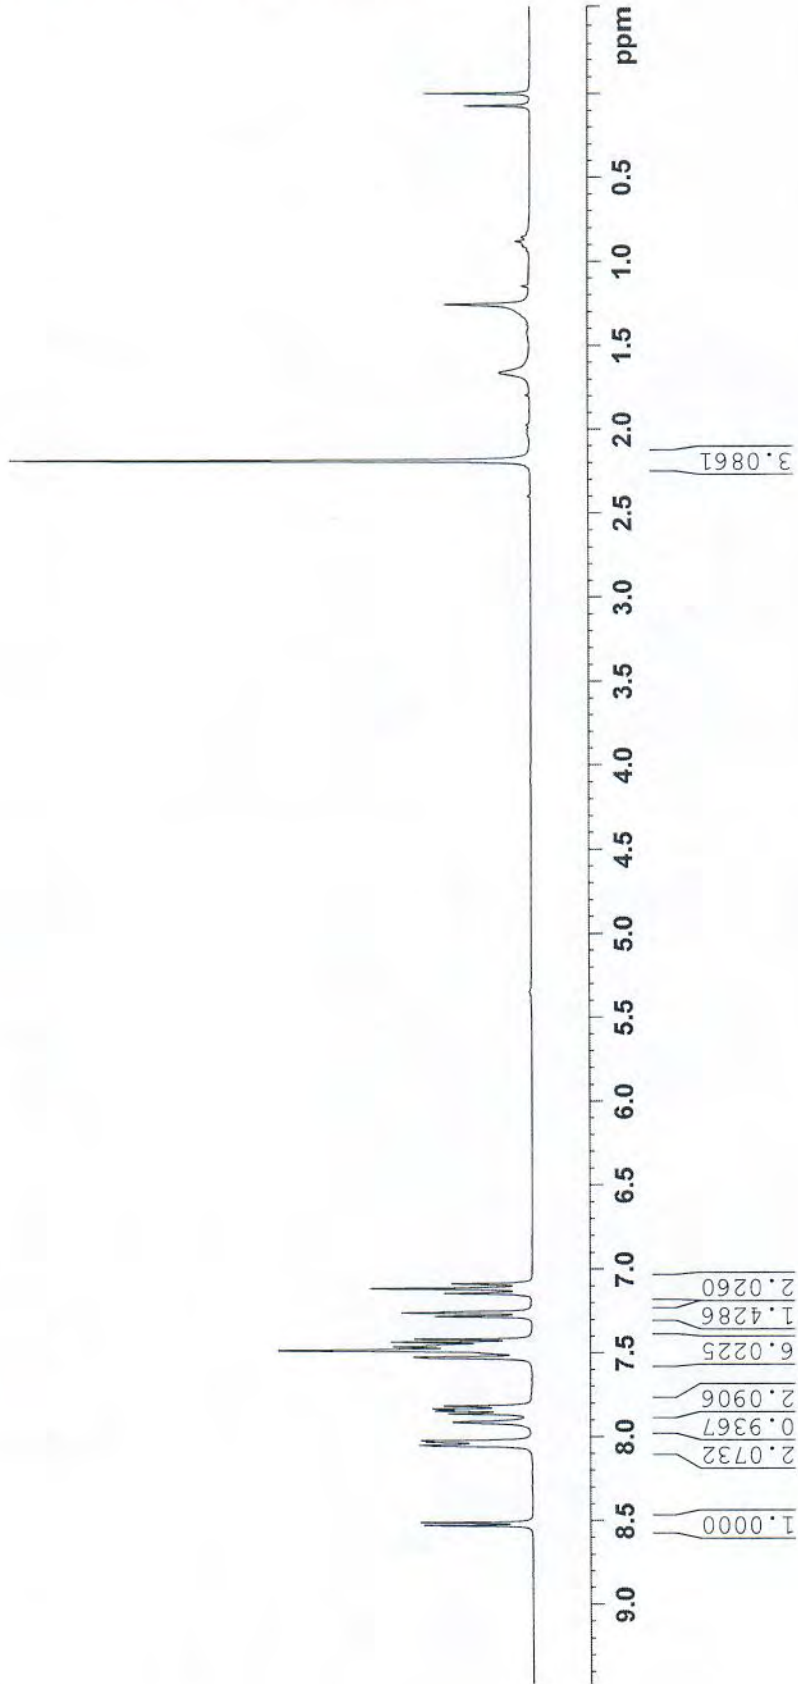

|                    |                     |                               |         |                        |                      |
|--------------------|---------------------|-------------------------------|---------|------------------------|----------------------|
| <b>Sample Name</b> |                     | <b>Position</b>               | p2F9    | <b>Instrument Name</b> | Instrument 1         |
| <b>User Name</b>   | QTOF-PC\QTOF        | <b>Inj Vol</b>                | 0.1     | <b>InjPosition</b>     |                      |
| <b>Sample Type</b> | Sample              | <b>IRM Calibration Status</b> | Success | <b>Data Filename</b>   | B10-p.d              |
| <b>ACQ Method</b>  | 20110418-MSonly-p.m | <b>Comment</b>                |         | <b>Acquired Time</b>   | 3/12/2018 3:53:13 PM |

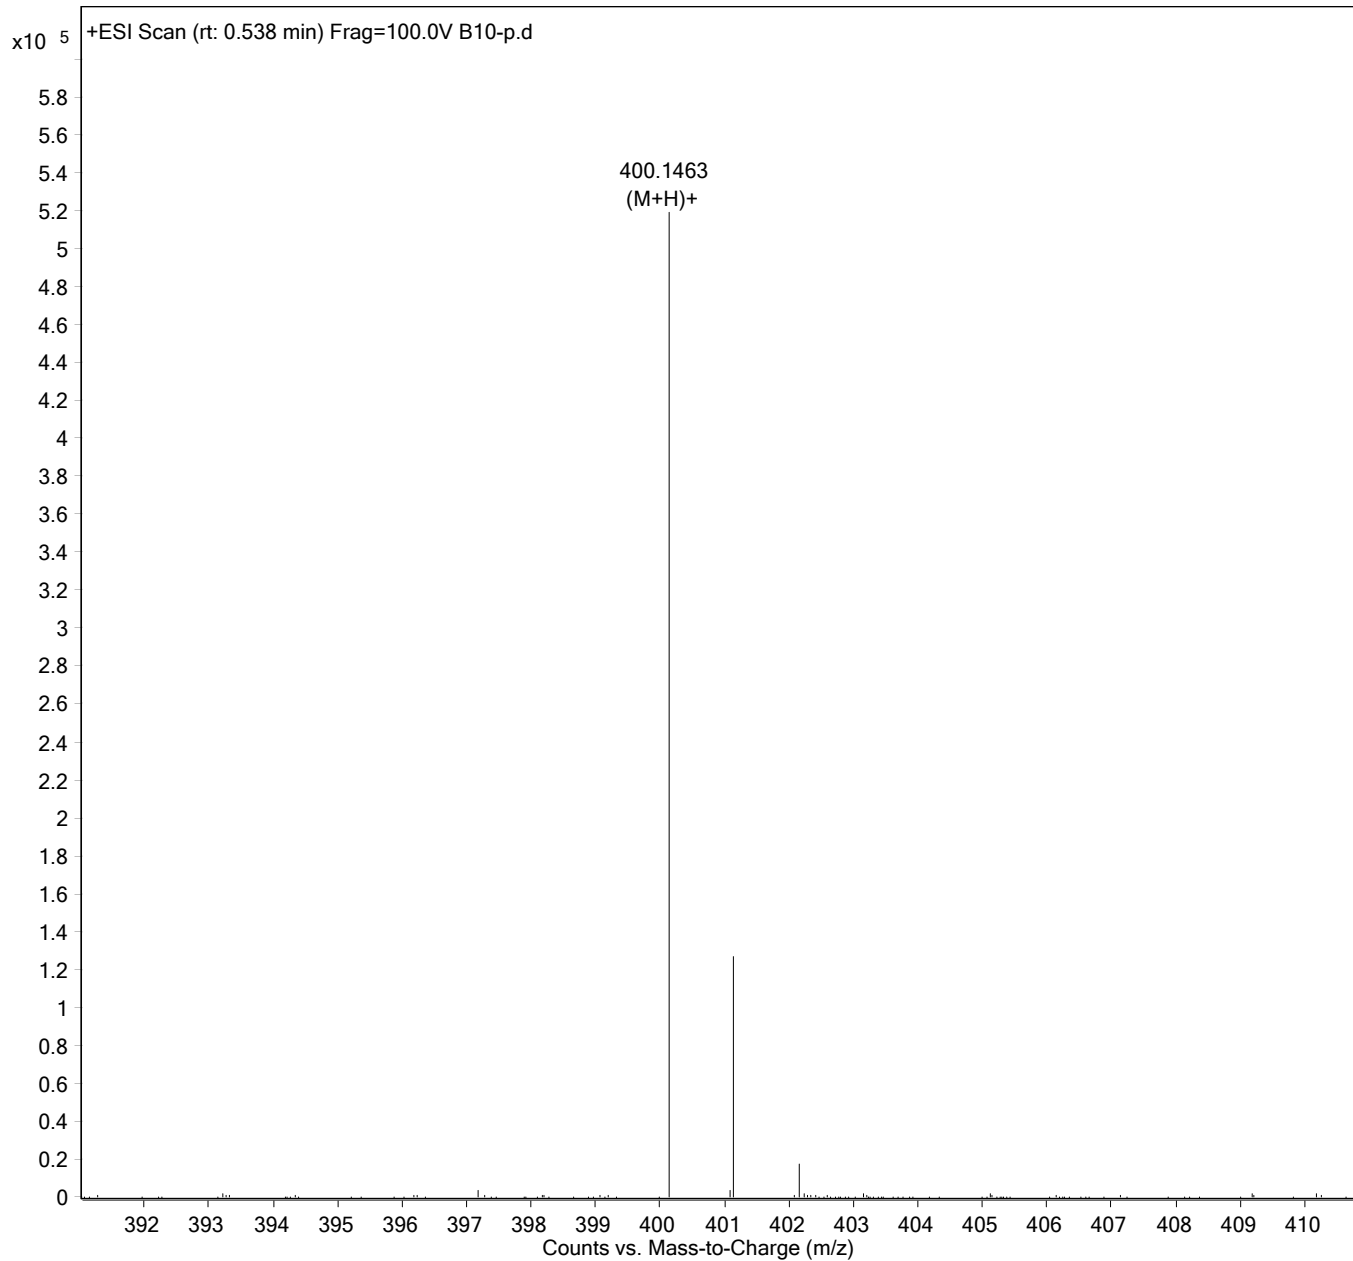



B11

SP121210-1 CDCl<sub>3</sub> 303K C13-NMR AV300

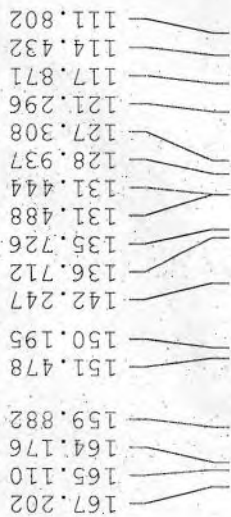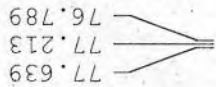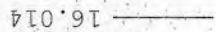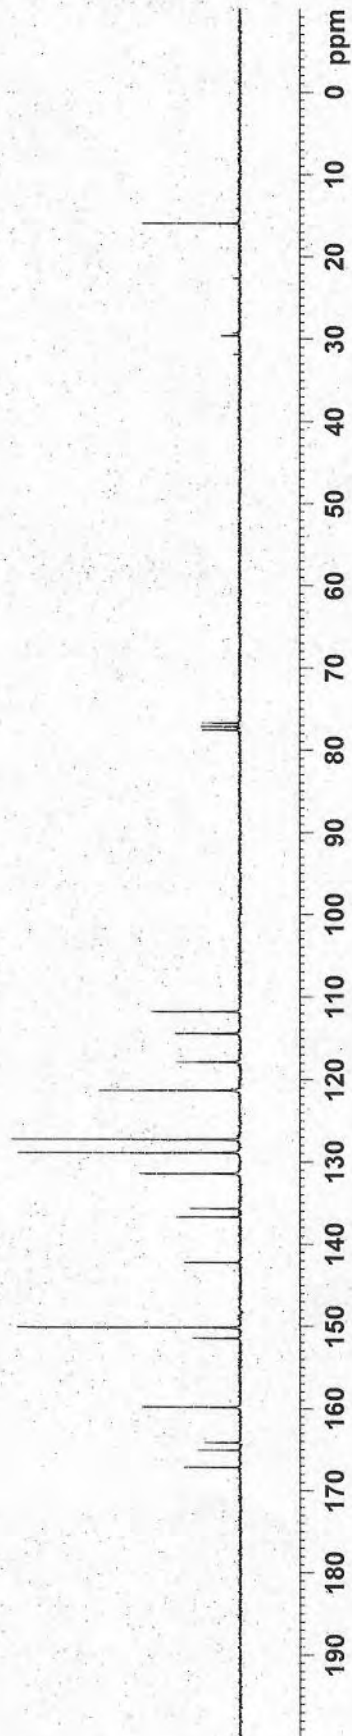

B11

SP121210-1 1H-NMR CDCl3 303K AV-300

9.3858  
8.5550  
8.5406  
8.4359  
8.4190  
7.9872  
7.9641  
7.6124  
7.5971  
7.5533  
7.5271  
7.4985  
7.4579  
7.4347  
7.4099  
7.3789  
7.3614  
7.2078  
7.1805

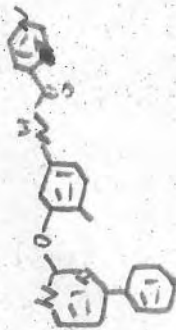

2.1274

0.0000

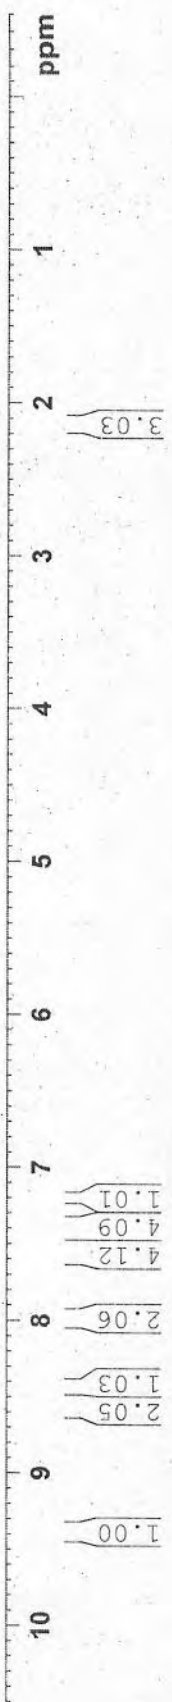

|                    |                     |                               |         |                        |                      |
|--------------------|---------------------|-------------------------------|---------|------------------------|----------------------|
| <b>Sample Name</b> |                     | <b>Position</b>               | p1A1    | <b>Instrument Name</b> | Instrument 1         |
| <b>User Name</b>   | QTOF-PC\QTOF        | <b>Inj Vol</b>                | 0.1     | <b>InjPosition</b>     |                      |
| <b>Sample Type</b> | Sample              | <b>IRM Calibration Status</b> | Success | <b>Data Filename</b>   | B11-p.d              |
| <b>ACQ Method</b>  | 20110418-MSonly-p.m | <b>Comment</b>                |         | <b>Acquired Time</b>   | 3/12/2018 3:50:54 PM |

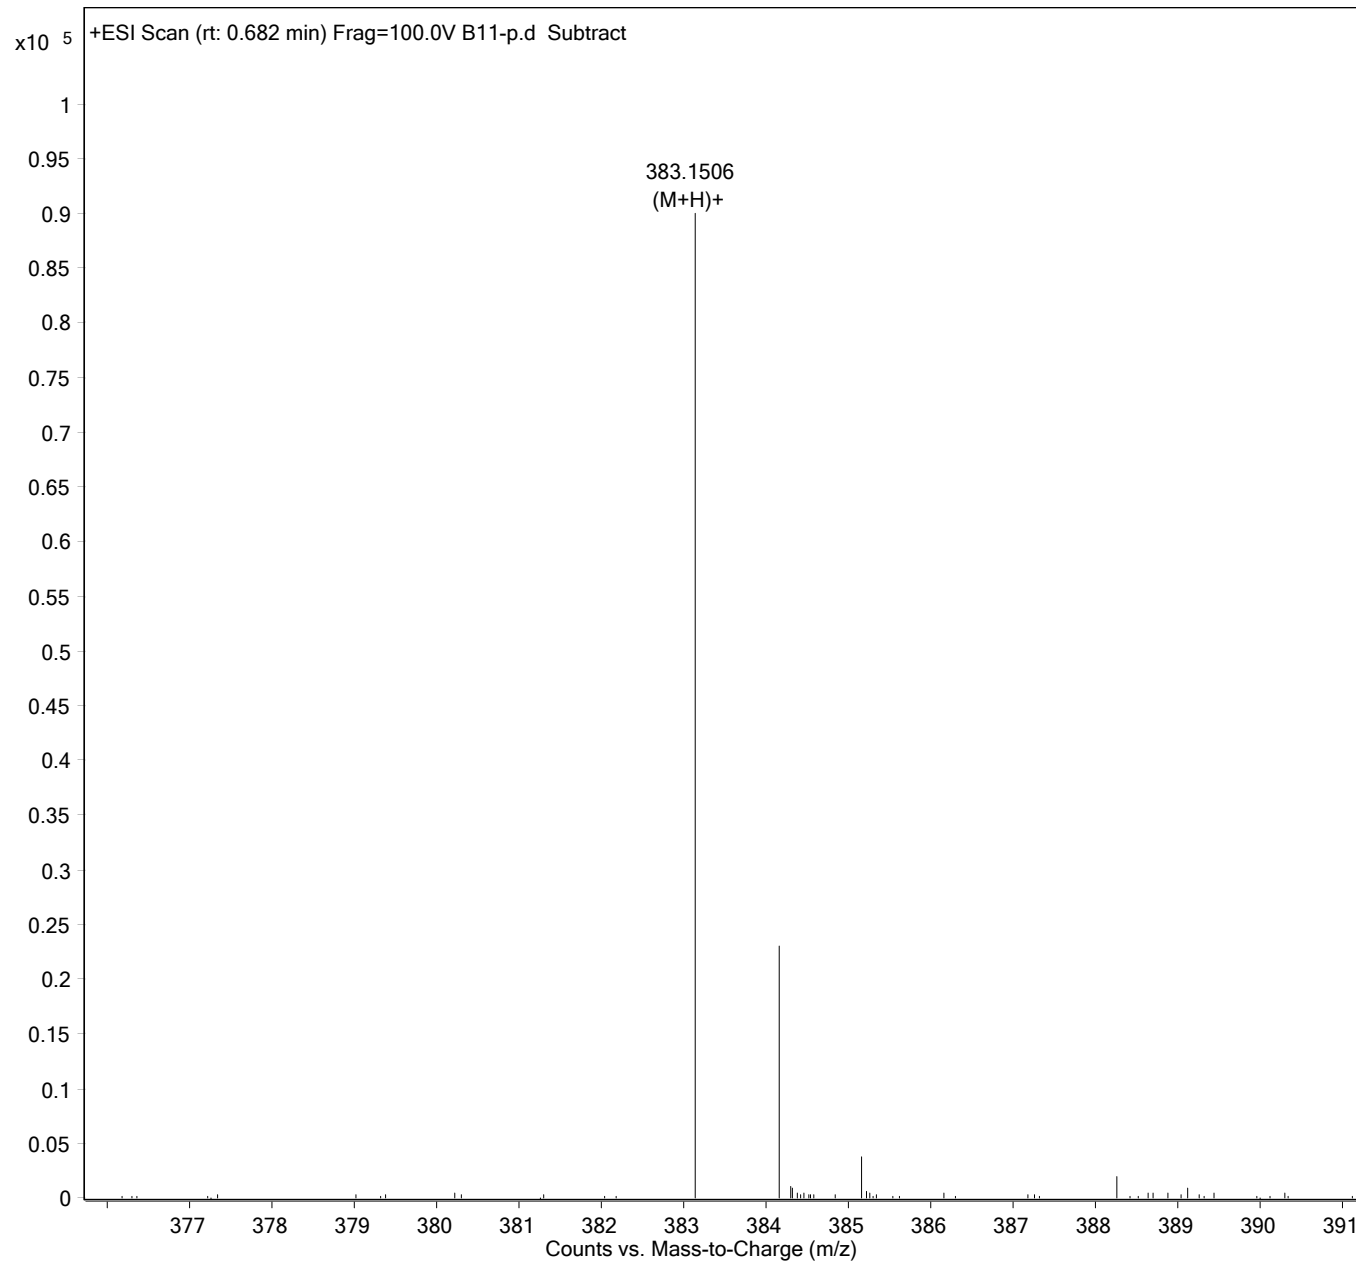

B12

SPI21210-2 CDCl3 303K C13-NMR AV300

167.258  
165.173  
164.022  
159.847  
152.163  
151.490  
148.041  
136.807  
135.807  
135.460  
131.451  
130.840  
128.938  
127.336  
123.575  
117.756  
114.297  
111.764

77.530  
77.106  
76.681

15.991

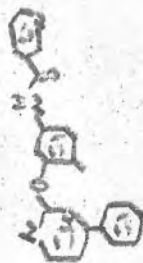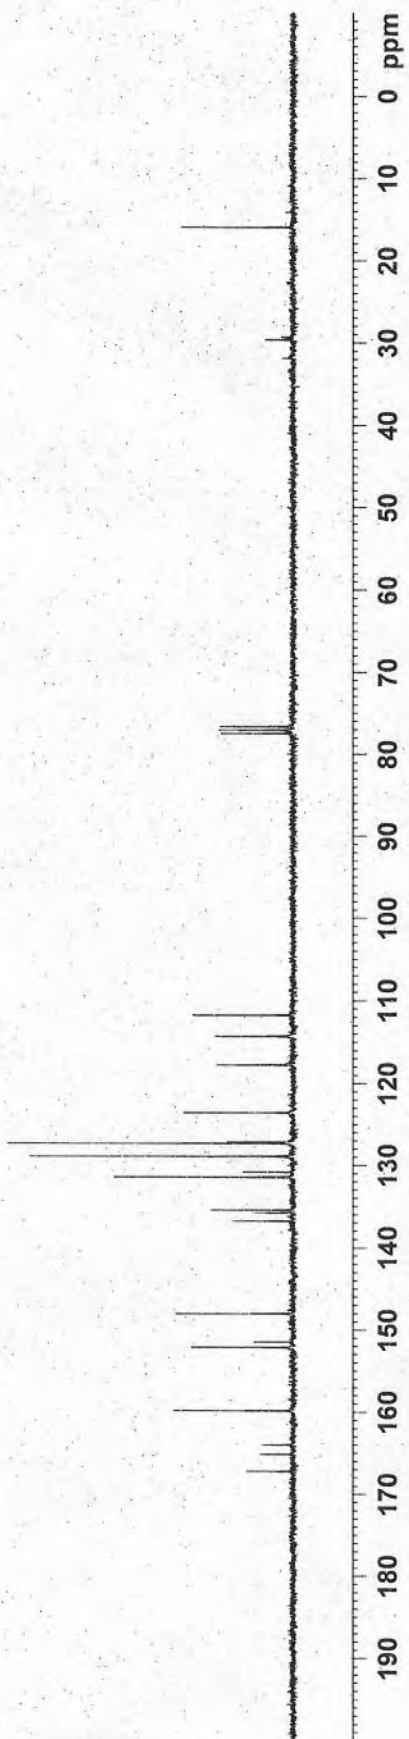

## SP121210-2 1H-NMR CDCl3 303K AV-300

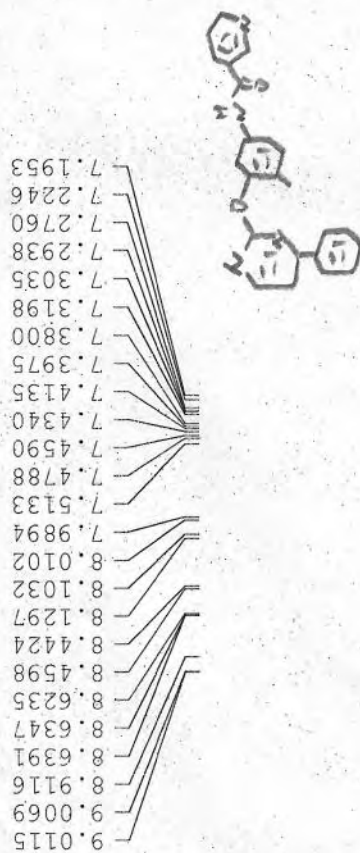

|        |
|--------|
| 9.0115 |
| 9.0069 |
| 8.9116 |
| 8.6391 |
| 8.6347 |
| 8.6235 |
| 8.4598 |
| 8.4424 |
| 8.1297 |
| 8.1032 |
| 8.0102 |
| 7.9894 |
| 7.5133 |
| 7.4788 |
| 7.4590 |
| 7.4340 |
| 7.4135 |
| 7.3975 |
| 7.3800 |
| 7.3198 |
| 7.3035 |
| 7.2938 |
| 7.2760 |
| 7.2246 |
| 7.1953 |

2.1366

0.0862  
0.0000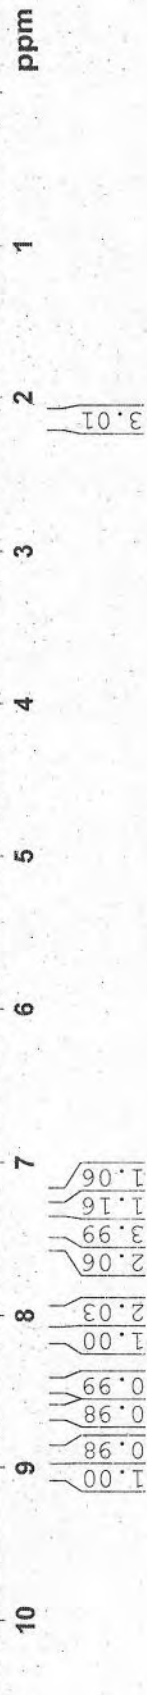

|                    |                     |                               |         |                        |                      |
|--------------------|---------------------|-------------------------------|---------|------------------------|----------------------|
| <b>Sample Name</b> |                     | <b>Position</b>               | p1A2    | <b>Instrument Name</b> | Instrument 1         |
| <b>User Name</b>   | QTOF-PC\QTOF        | <b>Inj Vol</b>                | 0.1     | <b>InjPosition</b>     |                      |
| <b>Sample Type</b> | Sample              | <b>IRM Calibration Status</b> | Success | <b>Data Filename</b>   | B12-p.d              |
| <b>ACQ Method</b>  | 20110418-MSonly-p.m | <b>Comment</b>                |         | <b>Acquired Time</b>   | 3/12/2018 3:55:07 PM |

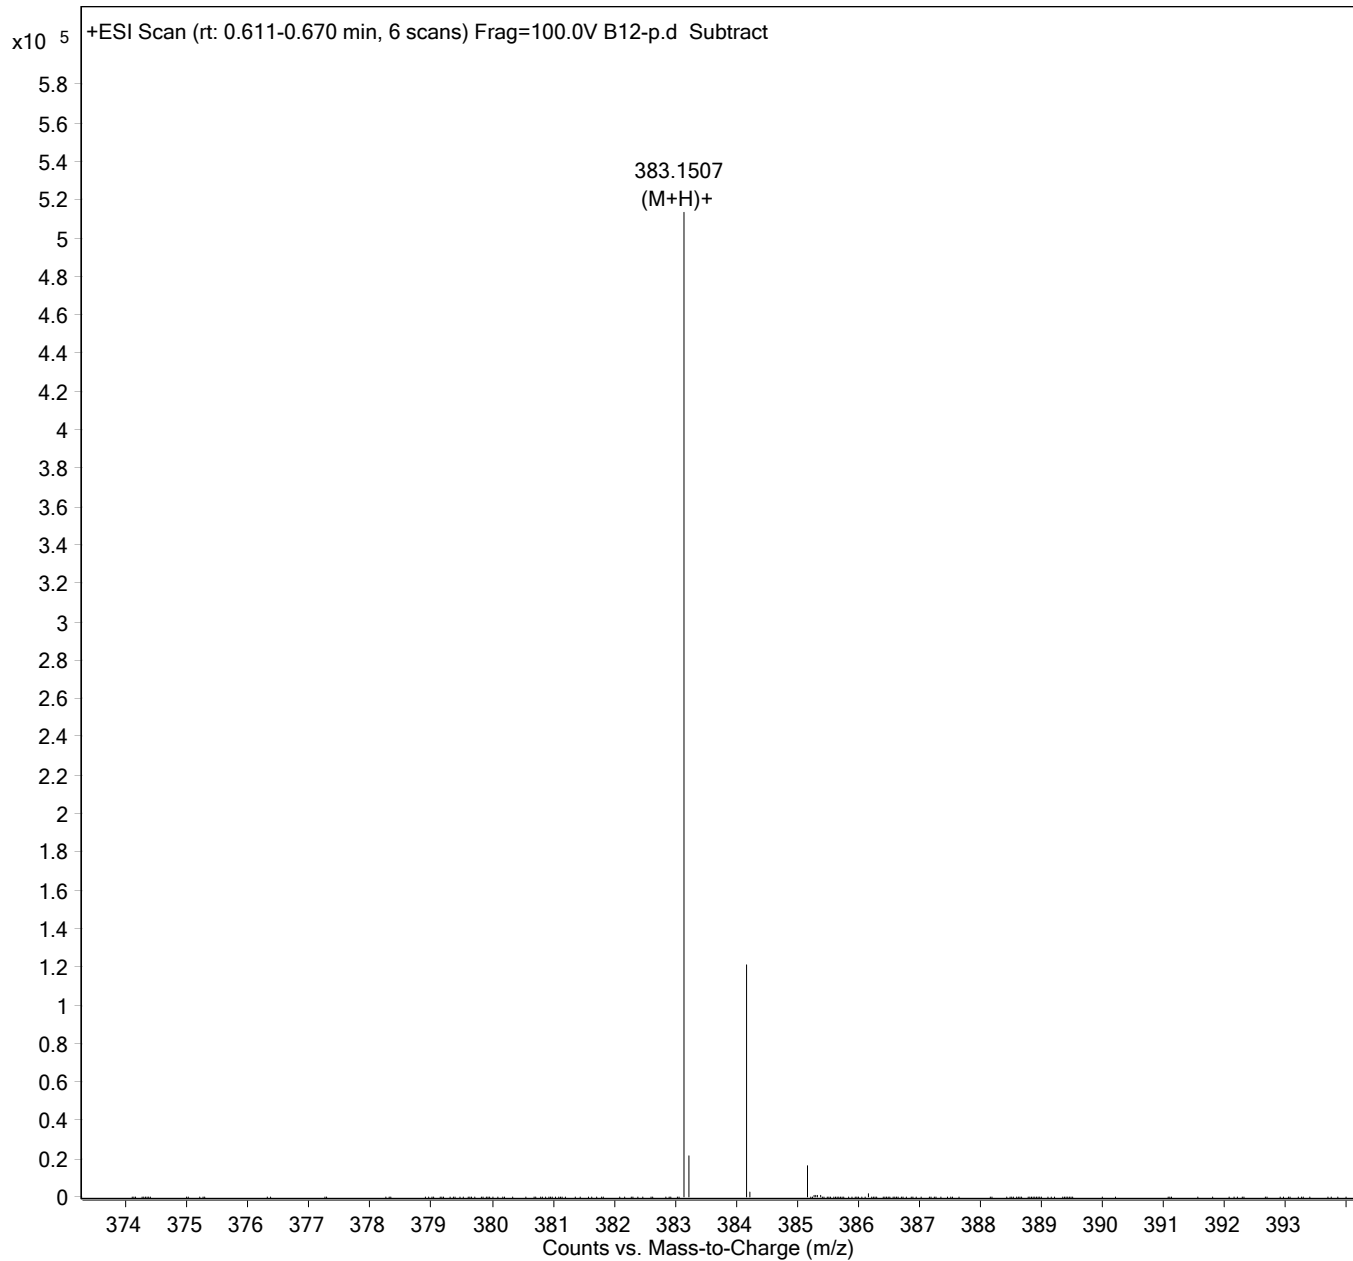

SP130325-2-C C13-NMR CDCL3 303K AV-300

169.850  
168.402  
165.130  
159.359  
151.423  
137.284  
134.953  
133.858  
131.276  
130.772  
130.386  
128.581  
128.278  
127.106  
126.273  
126.013  
125.049  
117.013  
116.840  
113.636

77.511  
77.087  
76.664

24.374  
15.964

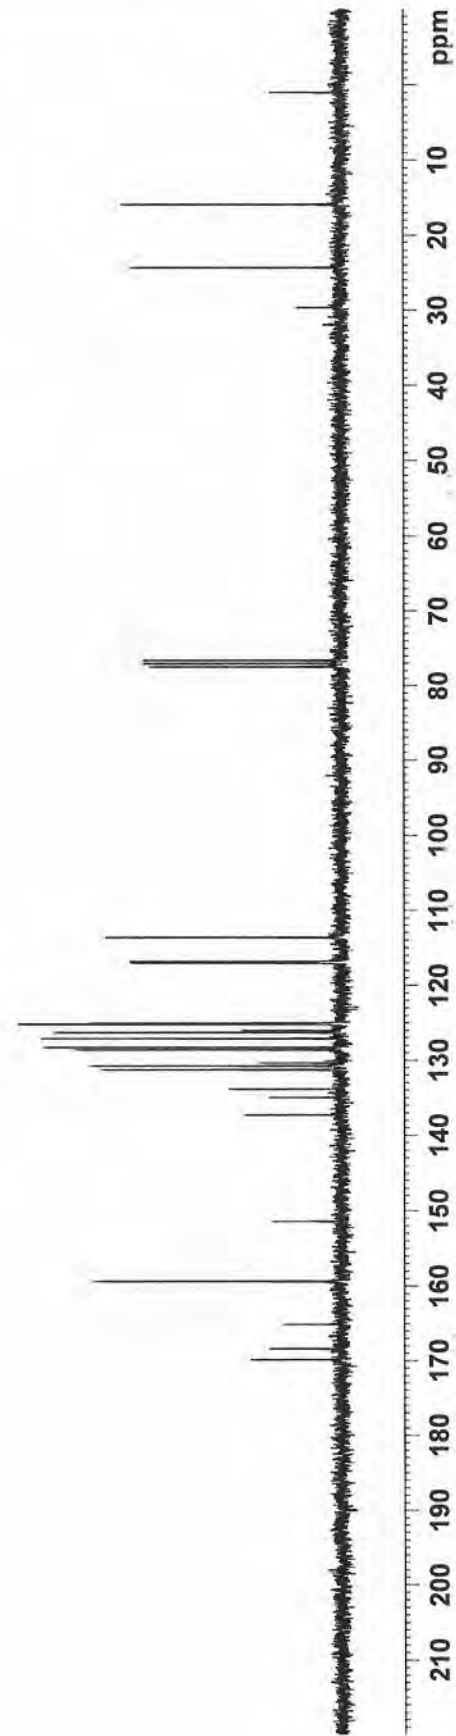

0.0748  
-0.0003

2.2001  
2.0738

7.1607  
7.1882  
7.2219  
7.2283  
7.2494  
7.2619  
7.3263  
7.3432  
7.4793  
7.4870  
7.5000  
7.5123  
7.5194  
7.5338  
7.5358  
7.5605  
7.6880  
7.6916  
7.7120  
7.7156  
7.7184  
7.8917  
7.9015  
7.9099  
7.9305  
7.9578  
8.2247  
8.2335  
8.2450  
8.2556  
8.5900  
8.6069

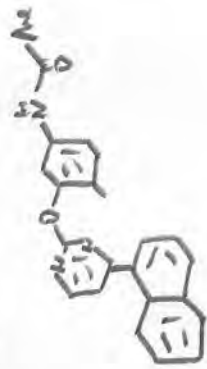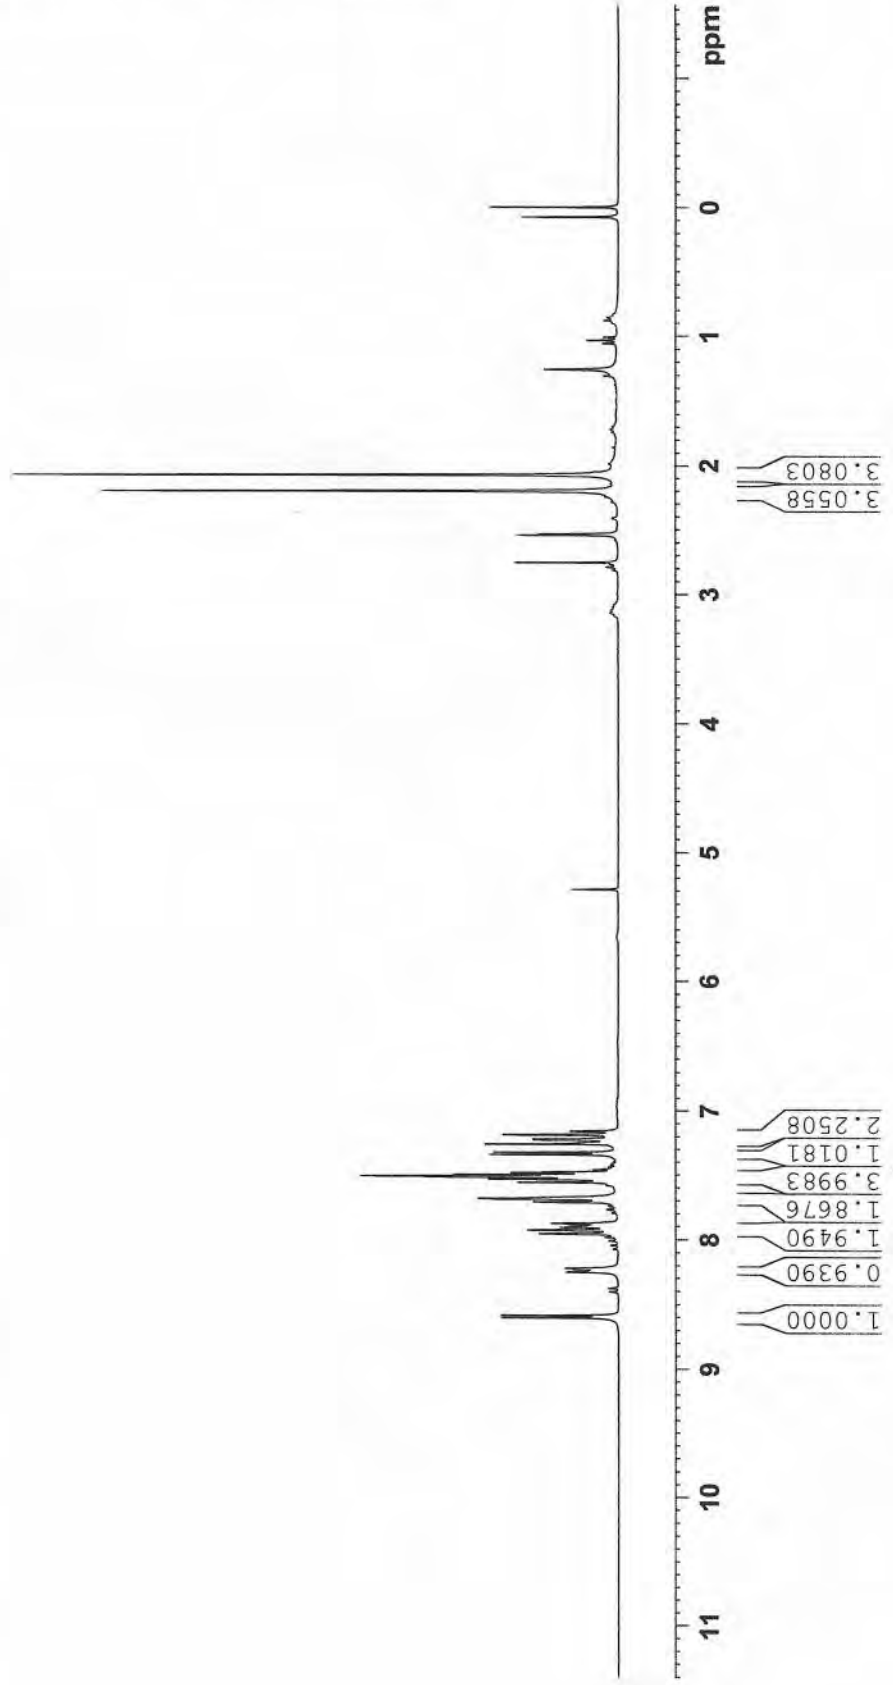



|                    |                     |                               |         |                        |                      |
|--------------------|---------------------|-------------------------------|---------|------------------------|----------------------|
| <b>Sample Name</b> |                     | <b>Position</b>               | p1A3    | <b>Instrument Name</b> | Instrument 1         |
| <b>User Name</b>   | QTOF-PC\QTOF        | <b>Inj Vol</b>                | 0.1     | <b>InjPosition</b>     |                      |
| <b>Sample Type</b> | Sample              | <b>IRM Calibration Status</b> | Success | <b>Data Filename</b>   | C1-p.d               |
| <b>ACQ Method</b>  | 20110418-MSonly-p.m | <b>Comment</b>                |         | <b>Acquired Time</b>   | 3/12/2018 3:57:44 PM |

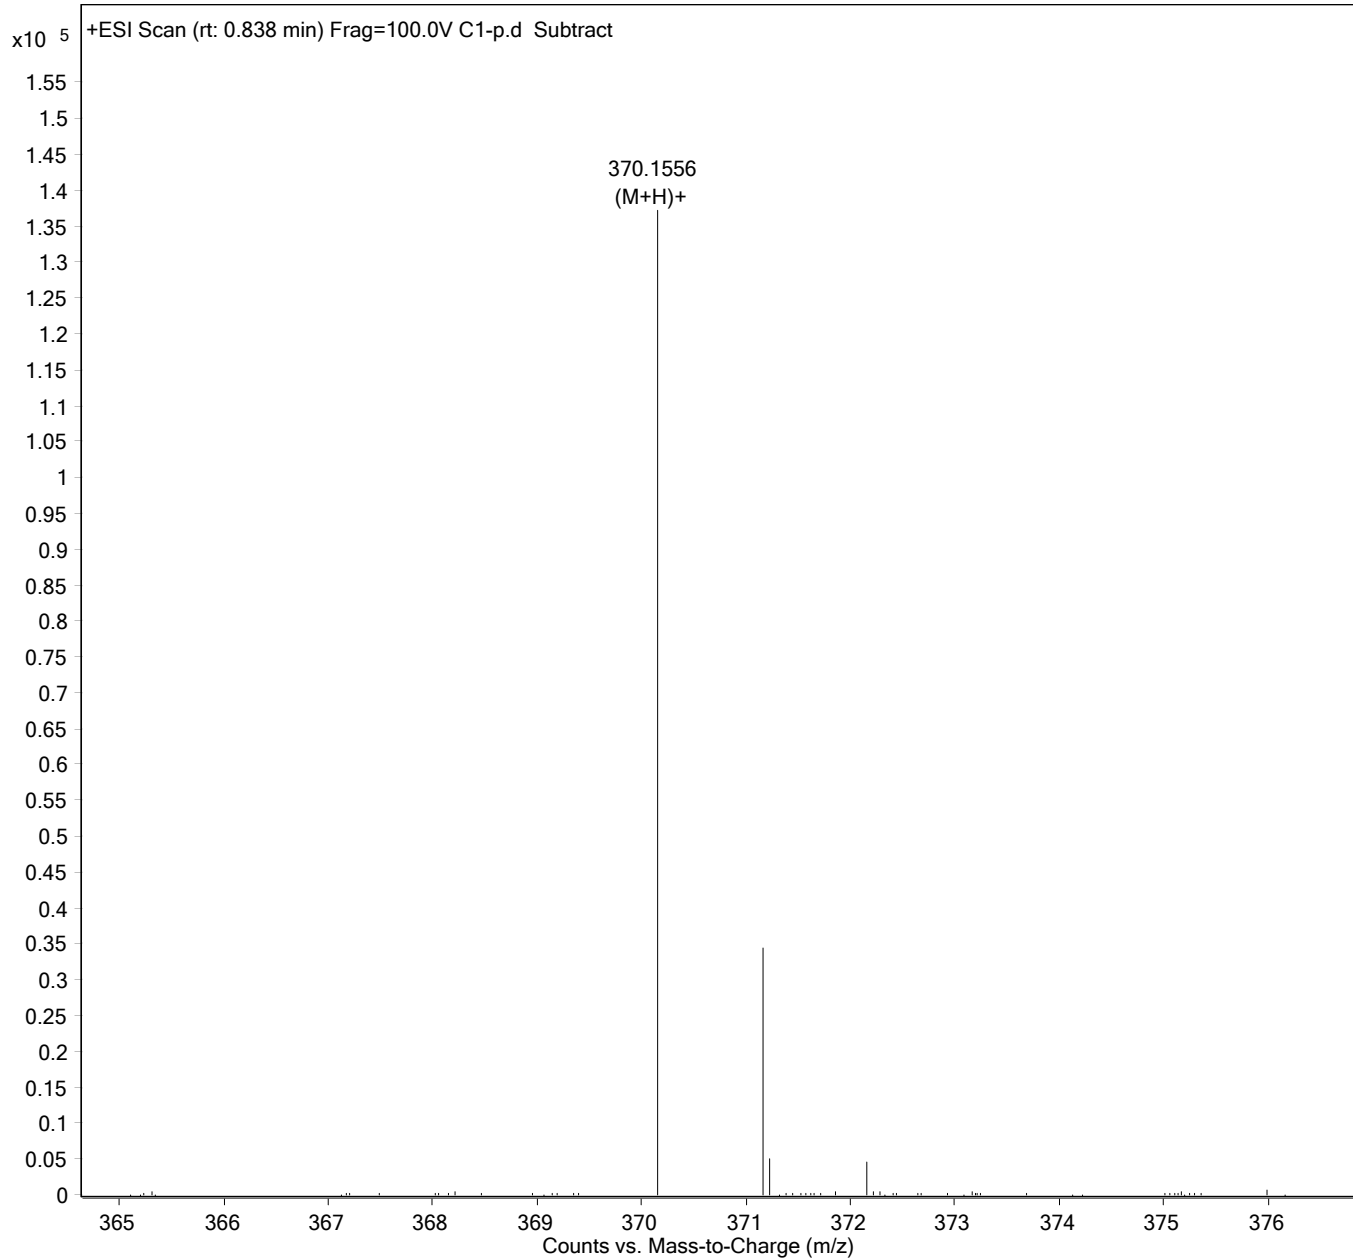

C2

SP130325-3-C C13-NMR CDCL3 303K AV-300

- 172.162
- 169.804
- 165.133
- 159.393
- 151.454
- 137.378
- 134.966
- 133.857
- 131.231
- 130.753
- 130.390
- 128.565
- 128.285
- 127.095
- 126.259
- 125.835
- 125.151
- 125.080
- 116.915
- 116.812
- 113.606
- 77.551
- 77.126
- 76.703
- 30.445
- 15.946
- 9.589

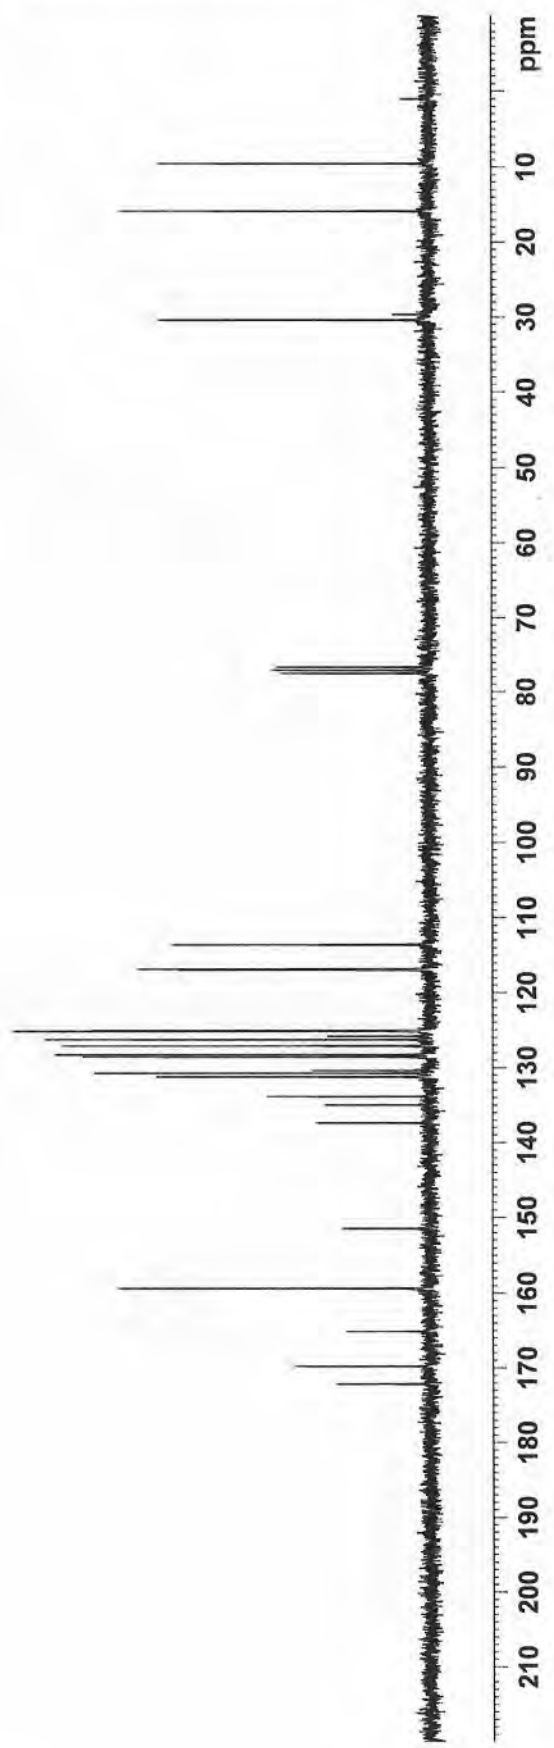

C2

SP2013-03-22-3 CDCL3 1HNMR AV300

8.6143  
8.5974  
8.2708  
8.2611  
8.2483  
8.2399  
7.9638  
7.9365  
7.9153  
7.9068  
7.8964  
7.8837  
7.7277  
7.7239  
7.7039  
7.7002  
7.5690  
7.5557  
7.5520  
7.5447  
7.5417  
7.5234  
7.5170  
7.5033  
7.4915  
7.4822  
7.4658  
7.3458  
7.3289  
7.3151  
7.2606  
7.2259  
7.2204  
7.2064  
7.1790

1.2283  
1.2033  
1.1781

2.3702  
2.3451  
2.3199  
2.2949  
2.2130

0.0728  
-0.0003

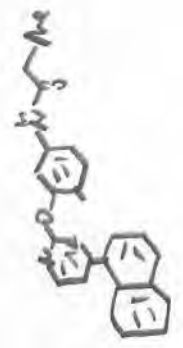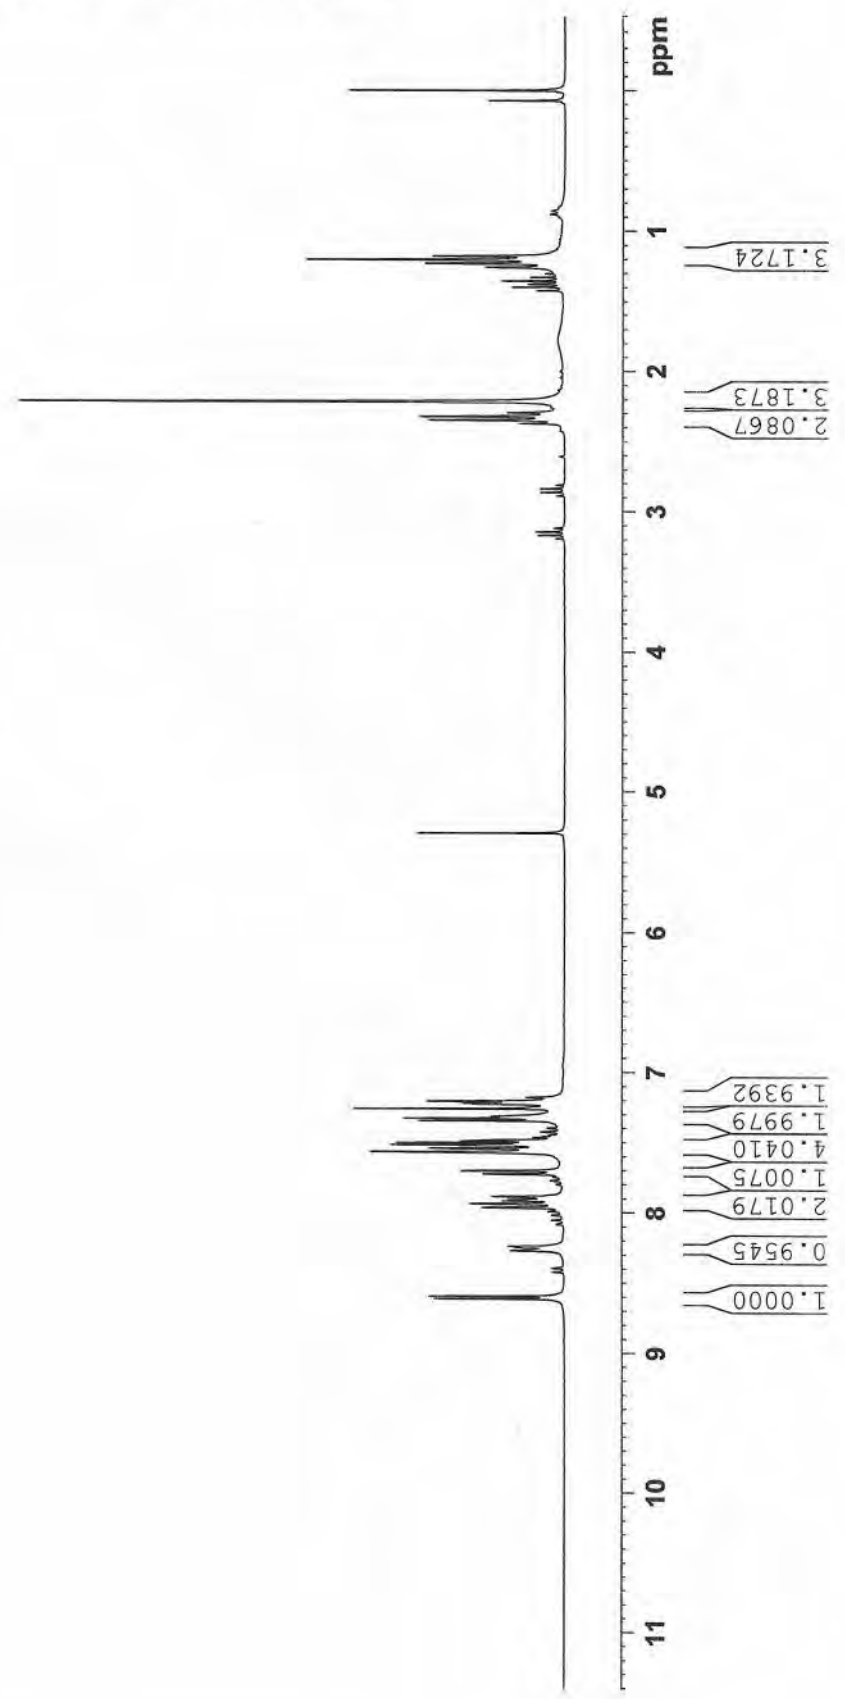

|                    |                     |                               |         |                        |                      |
|--------------------|---------------------|-------------------------------|---------|------------------------|----------------------|
| <b>Sample Name</b> |                     | <b>Position</b>               | p1A4    | <b>Instrument Name</b> | Instrument 1         |
| <b>User Name</b>   | QTOF-PC\QTOF        | <b>Inj Vol</b>                | 0.1     | <b>InjPosition</b>     |                      |
| <b>Sample Type</b> | Sample              | <b>IRM Calibration Status</b> | Success | <b>Data Filename</b>   | C2-p.d               |
| <b>ACQ Method</b>  | 20110418-MSonly-p.m | <b>Comment</b>                |         | <b>Acquired Time</b>   | 3/12/2018 3:59:34 PM |

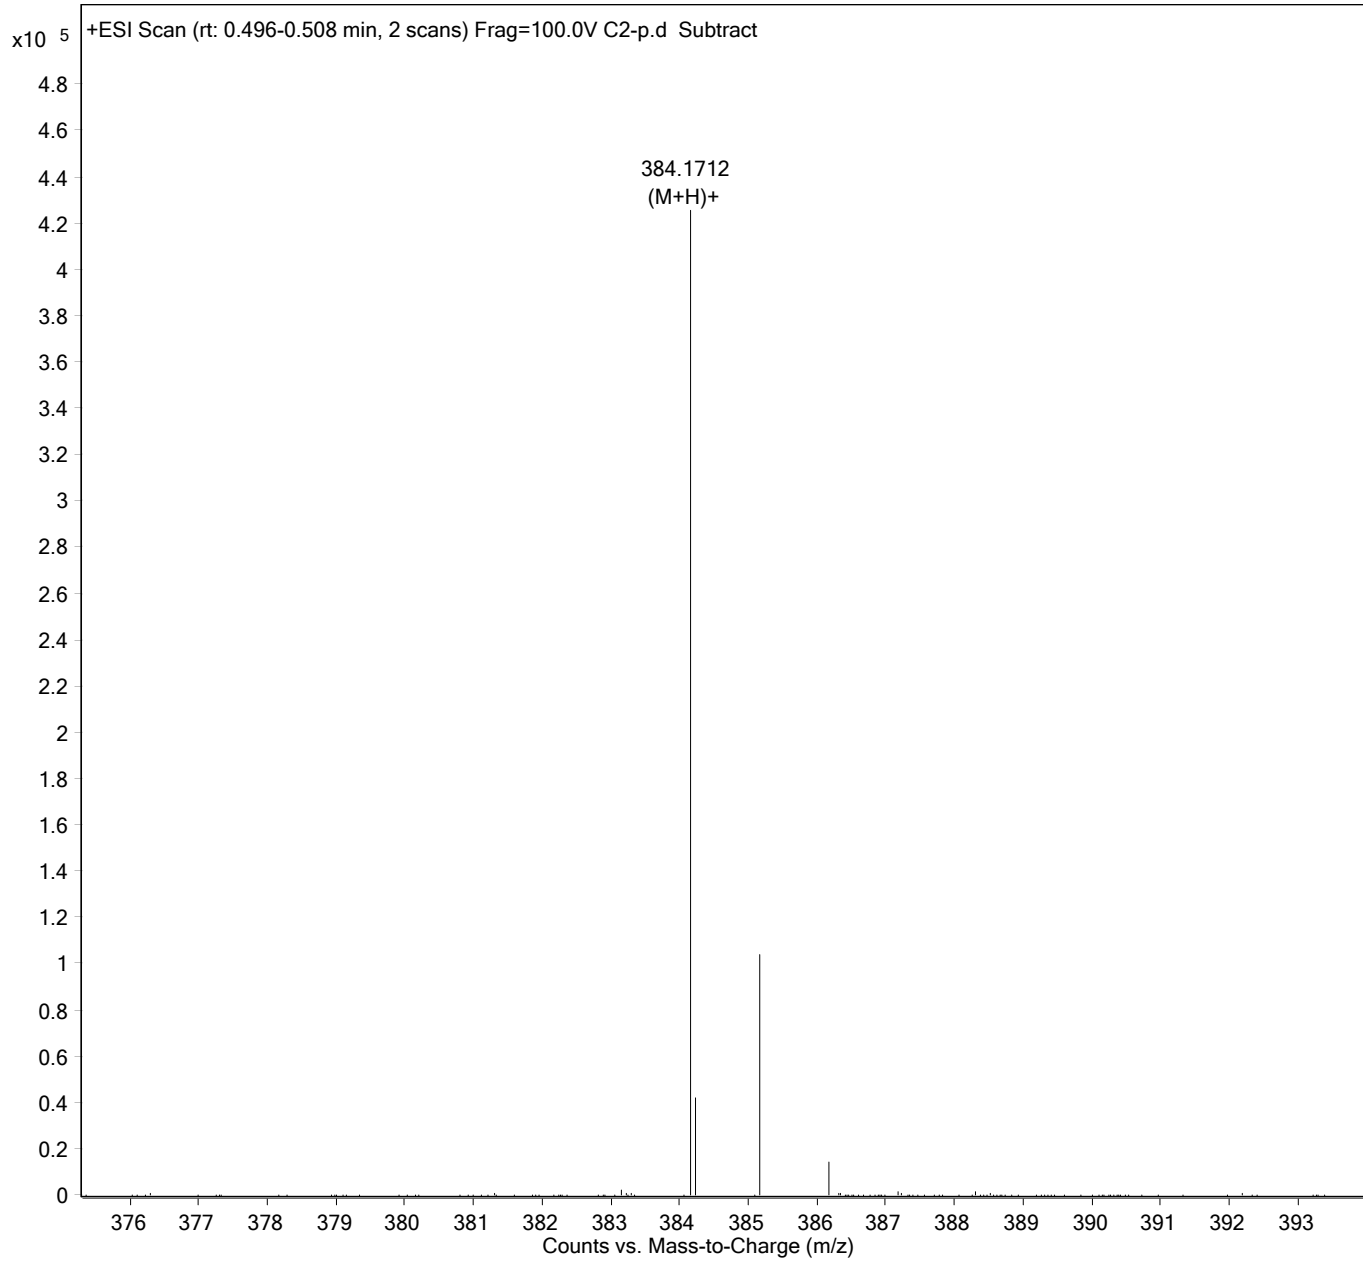

C3

SP131216-3-C C13-NMR CDCL3 303K AV-300

169.721  
165.118  
159.550  
155.916  
151.684  
147.747  
144.196  
136.364  
135.049  
133.883  
131.450  
130.722  
130.429  
128.535  
128.319  
127.069  
126.700  
126.238  
125.159  
125.124  
116.957  
116.781  
115.278  
113.766  
112.620

77.487  
77.063  
76.639

29.712

16.024

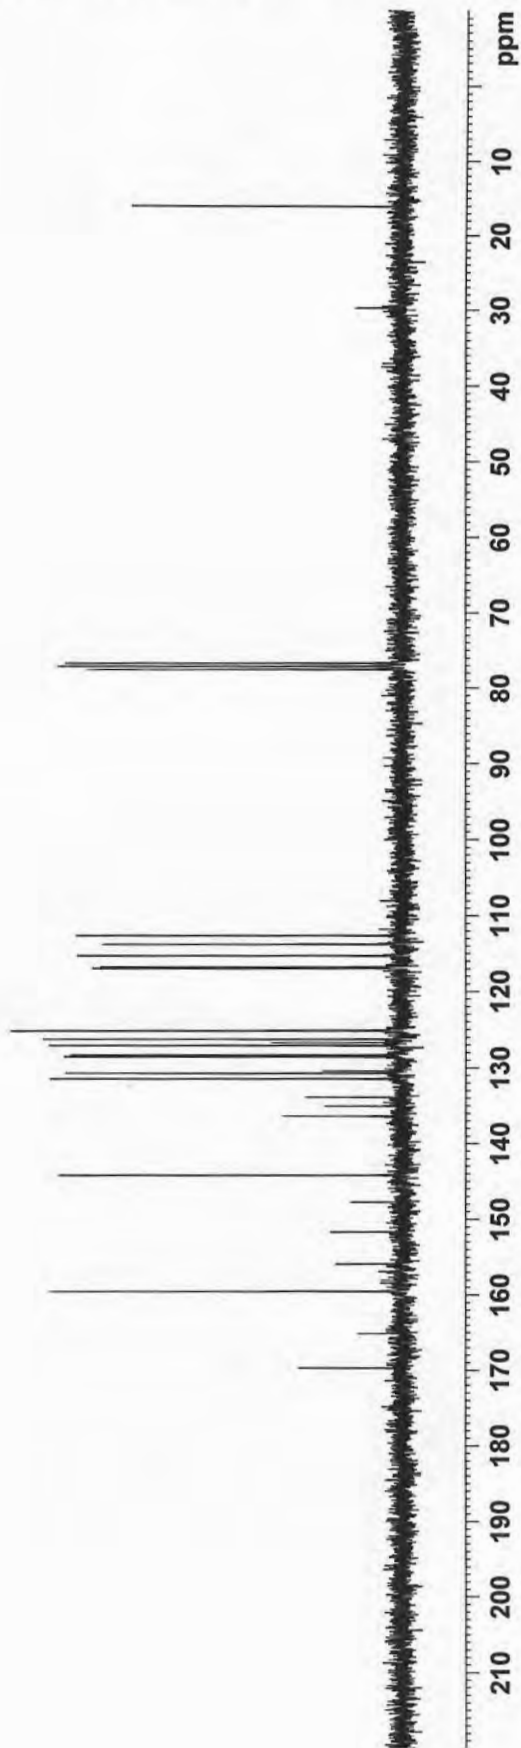

SP131216-3 CDCL3 1HNMR AV300

— 0.0002  
— 0.8788  
— 1.2553  
— 2.2360

C3

7.9028  
7.8884  
7.8771  
7.8713  
7.7257  
7.7178  
7.7107  
7.5624  
7.5371  
7.5242  
7.5098  
7.5018  
7.4947  
7.4753  
7.3927  
7.3859  
7.3652  
7.3581  
7.3486  
7.3317  
7.2584  
7.2330  
7.2131  
7.2017  
6.5328  
6.5271  
6.5214  
6.5157  
5.2830

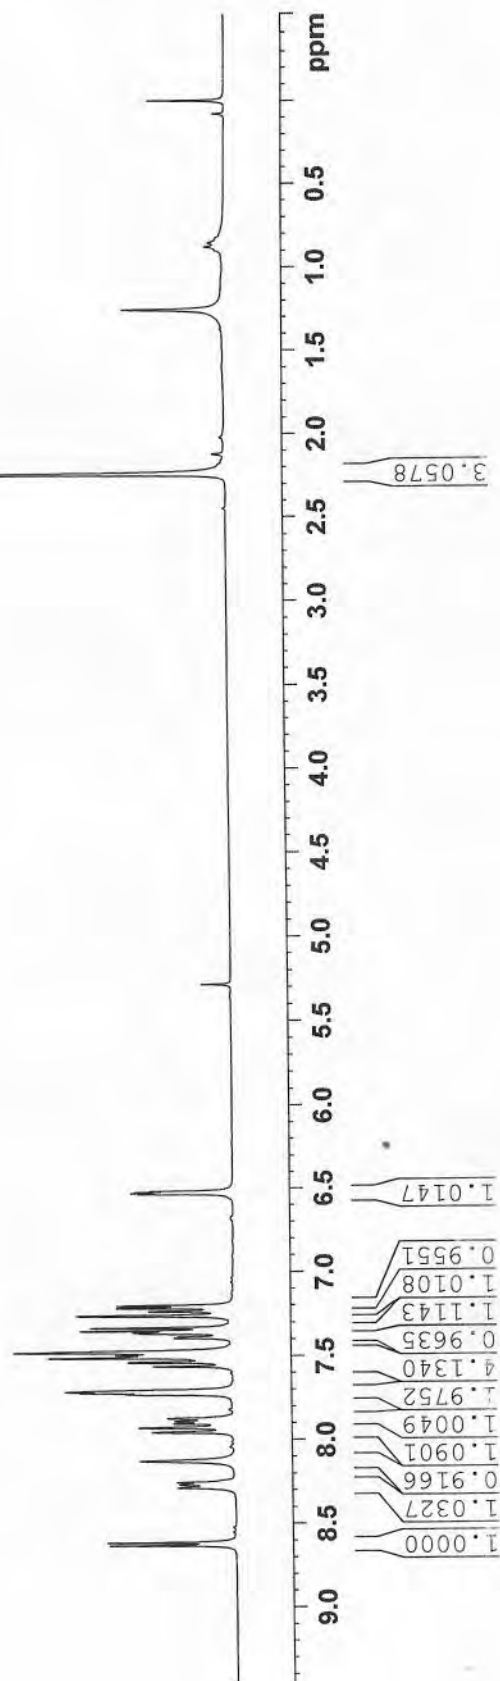

|                    |                     |                               |         |                        |                      |
|--------------------|---------------------|-------------------------------|---------|------------------------|----------------------|
| <b>Sample Name</b> |                     | <b>Position</b>               | p1A5    | <b>Instrument Name</b> | Instrument 1         |
| <b>User Name</b>   | QTOF-PC\QTOF        | <b>Inj Vol</b>                | 0.1     | <b>InjPosition</b>     |                      |
| <b>Sample Type</b> | Sample              | <b>IRM Calibration Status</b> | Success | <b>Data Filename</b>   | C3-p.d               |
| <b>ACQ Method</b>  | 20110418-MSonly-p.m | <b>Comment</b>                |         | <b>Acquired Time</b>   | 3/12/2018 4:01:18 PM |

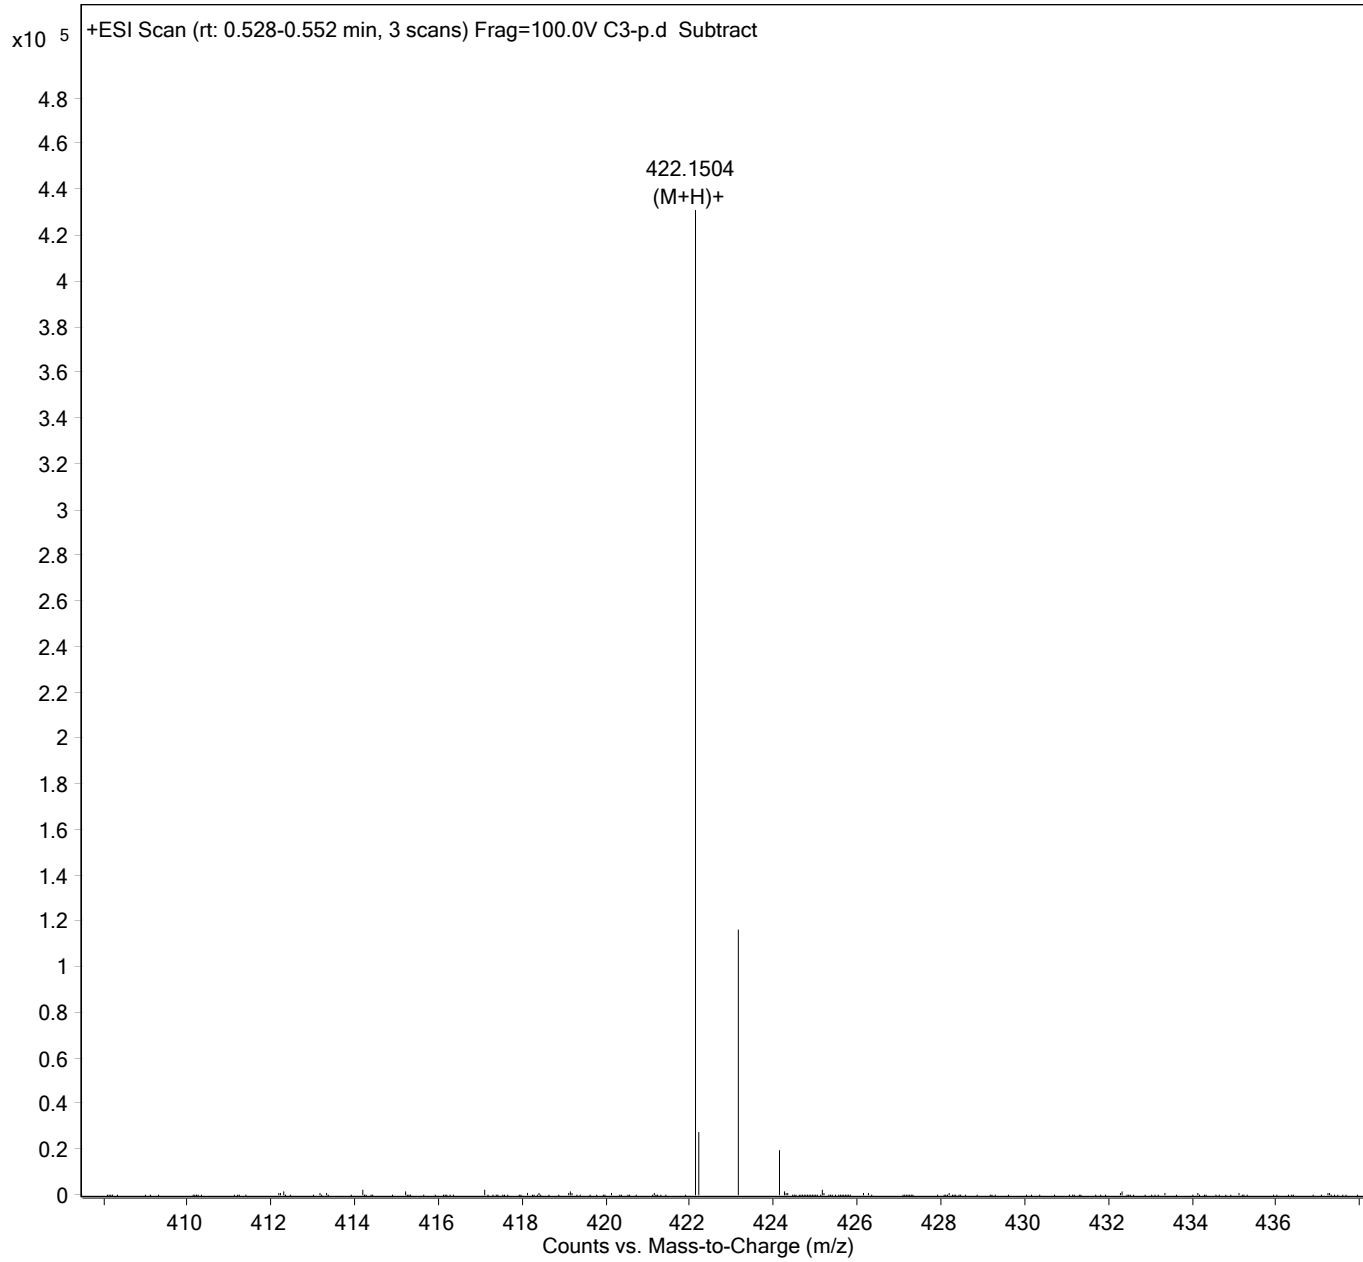

## SPI31216-4-C C13-NMR CDCL3 303K AV-300

169.750  
165.094  
160.667  
159.502  
151.582  
145.141  
143.928  
136.685  
134.968  
133.867  
131.411  
130.746  
130.396  
128.548  
128.298  
127.068  
126.669  
126.243  
125.142  
125.075  
122.956  
117.388  
116.804  
114.124  
108.383

77.477  
77.053  
76.629

29.705

15.987

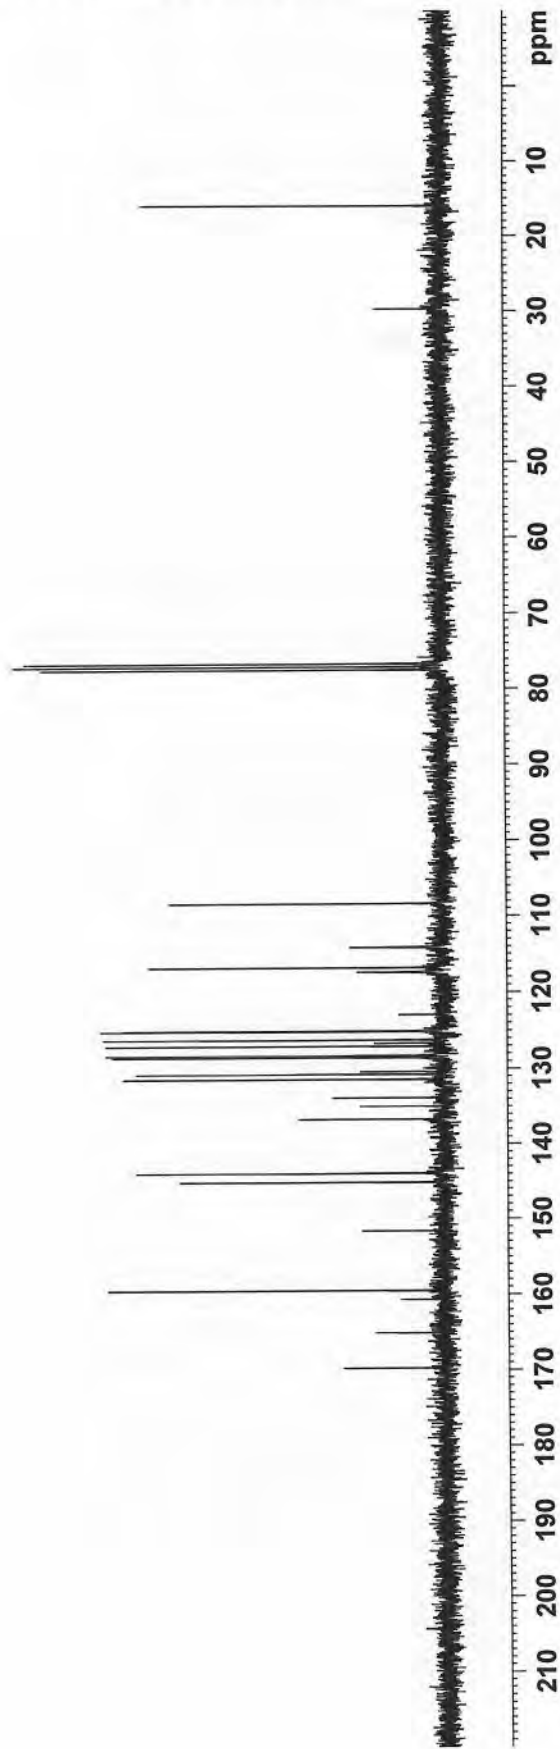



SP131216-4 CDCL3 1HNMR AV300

C4

7.9410  
7.9137  
7.8927  
7.8844  
7.8749  
7.8618  
7.7827  
7.6967  
7.6732  
7.6102  
7.5400  
7.5142  
7.4904  
7.4783  
7.4654  
7.4585  
7.4417  
7.4005  
7.3524  
7.3464  
7.3212  
7.3043  
7.2565  
7.2165  
7.1890  
6.6783

2.2139  
2.0374

1.2556

0.8789  
0.8557

0.0003

C4

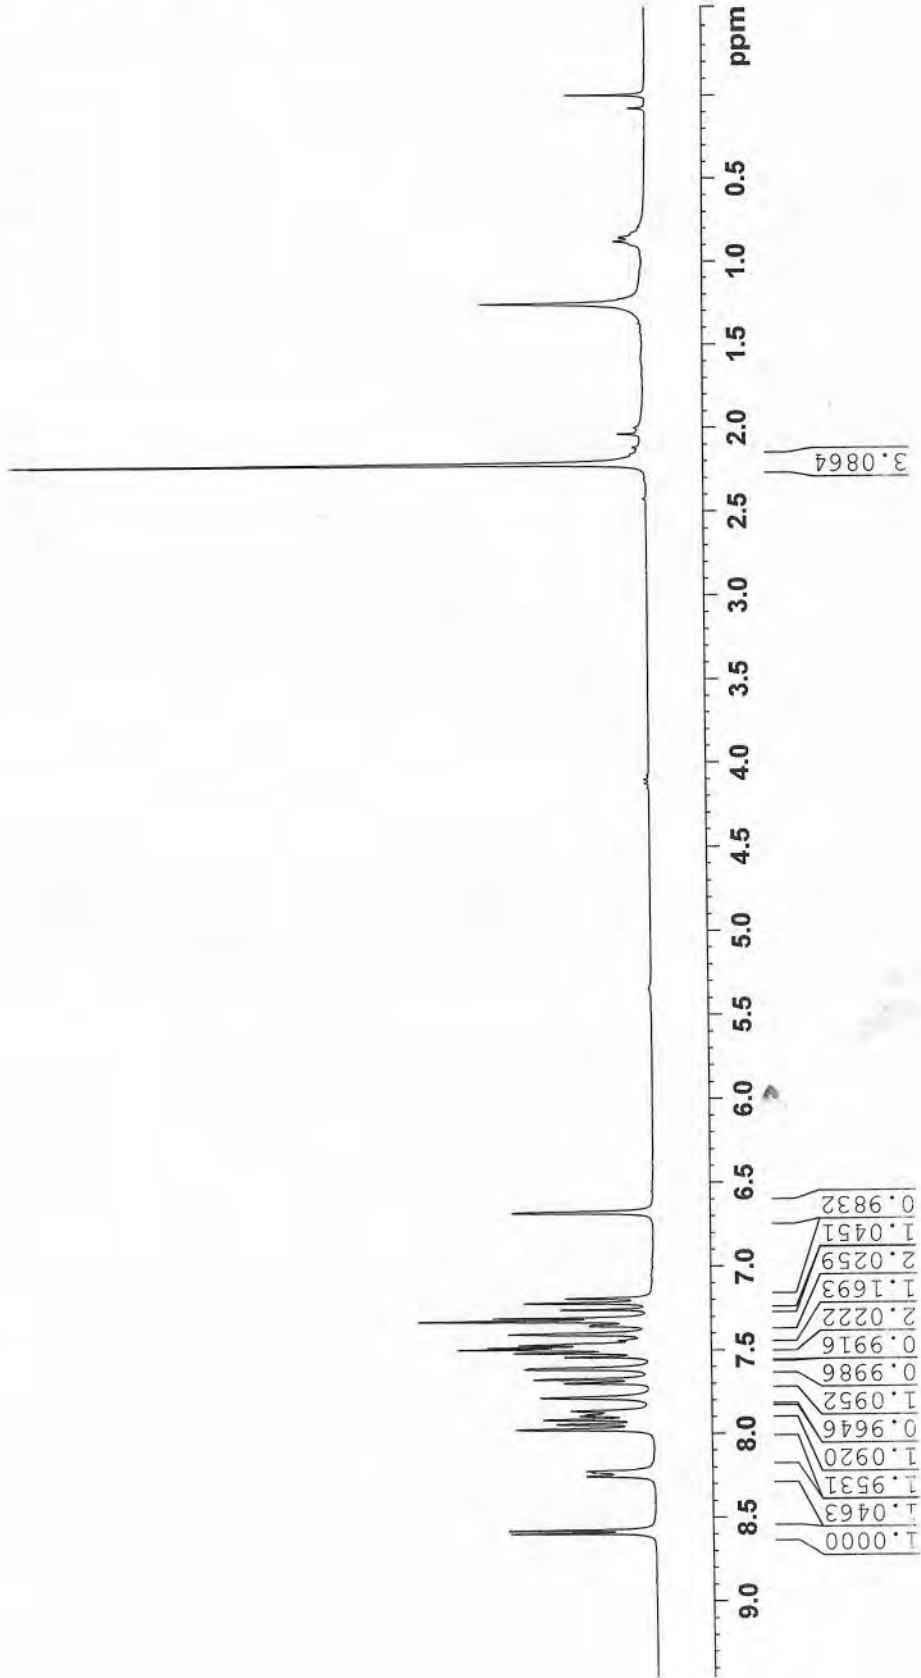

|                    |                     |                               |         |                        |                      |
|--------------------|---------------------|-------------------------------|---------|------------------------|----------------------|
| <b>Sample Name</b> |                     | <b>Position</b>               | p1A6    | <b>Instrument Name</b> | Instrument 1         |
| <b>User Name</b>   | QTOF-PC\QTOF        | <b>Inj Vol</b>                | 0.1     | <b>InjPosition</b>     |                      |
| <b>Sample Type</b> | Sample              | <b>IRM Calibration Status</b> | Success | <b>Data Filename</b>   | C4-p.d               |
| <b>ACQ Method</b>  | 20110418-MSonly-p.m | <b>Comment</b>                |         | <b>Acquired Time</b>   | 3/12/2018 4:03:38 PM |

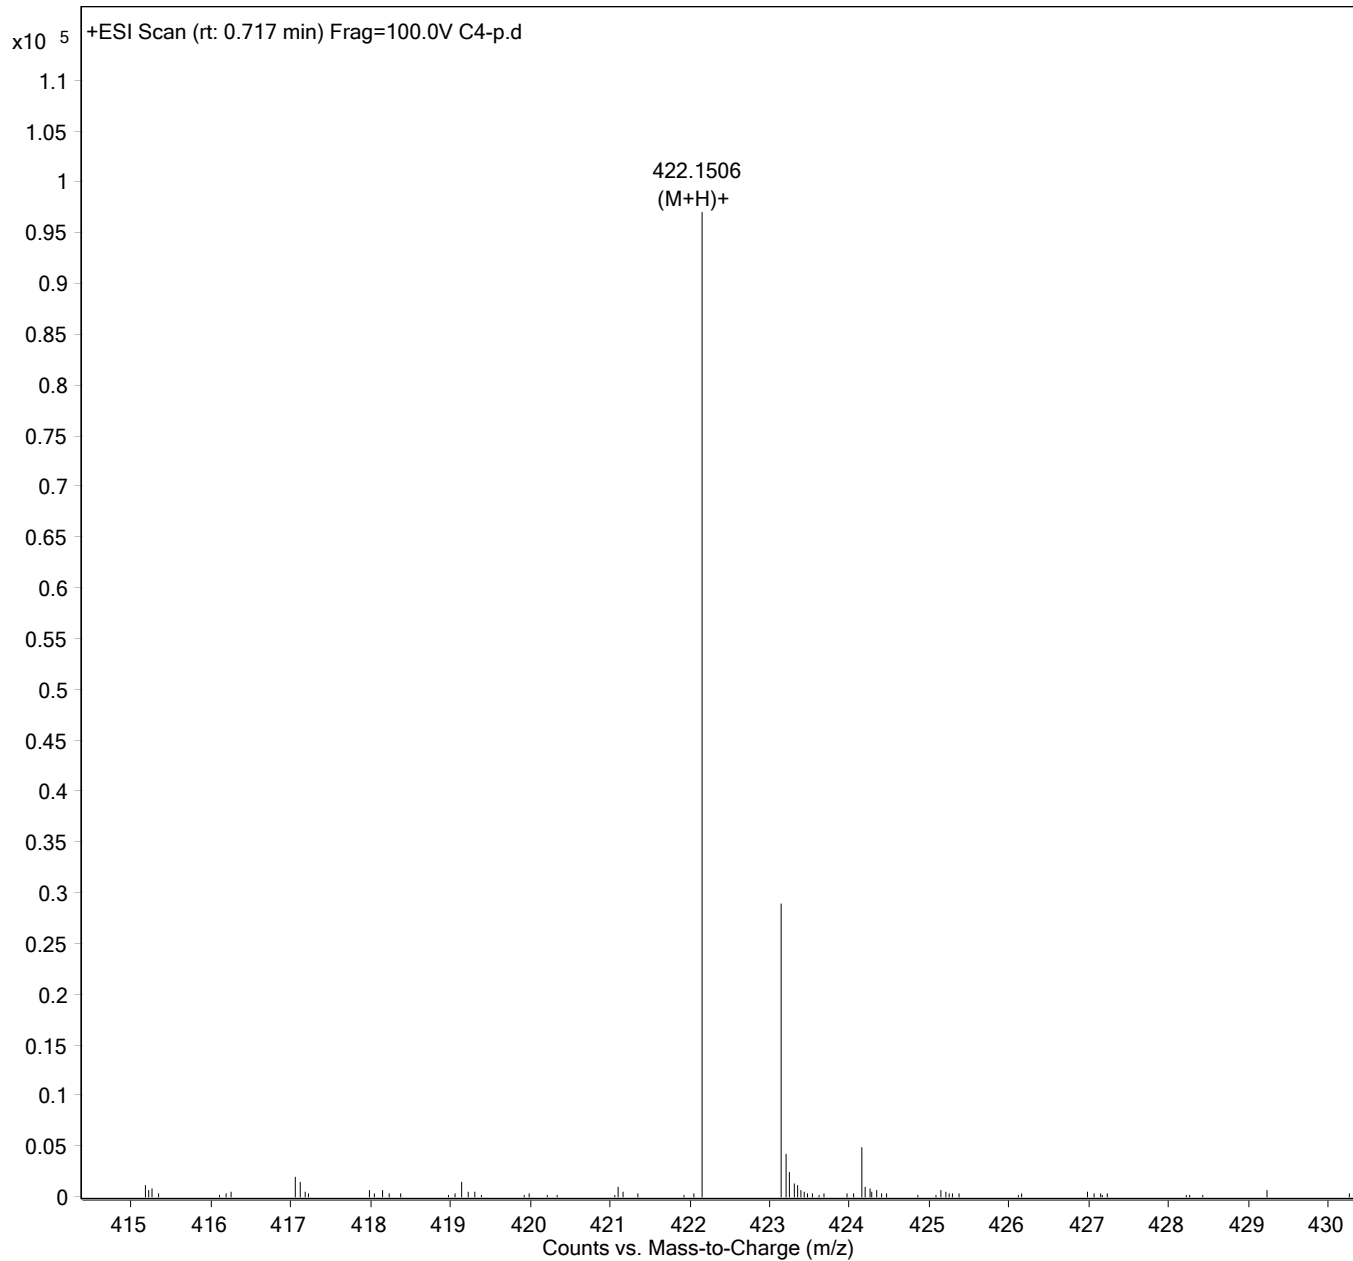

SP131216-5-C C13-NMR CDCL3 303K AV-300

169.727  
165.133  
160.930  
159.535  
151.676  
137.750  
136.763  
135.055  
133.889  
131.425  
130.718  
130.432  
128.631  
128.541  
128.305  
127.064  
126.859  
126.685  
126.235  
126.071  
125.156  
125.119  
117.198  
116.781  
114.016

77.444  
77.021  
76.597

16.014

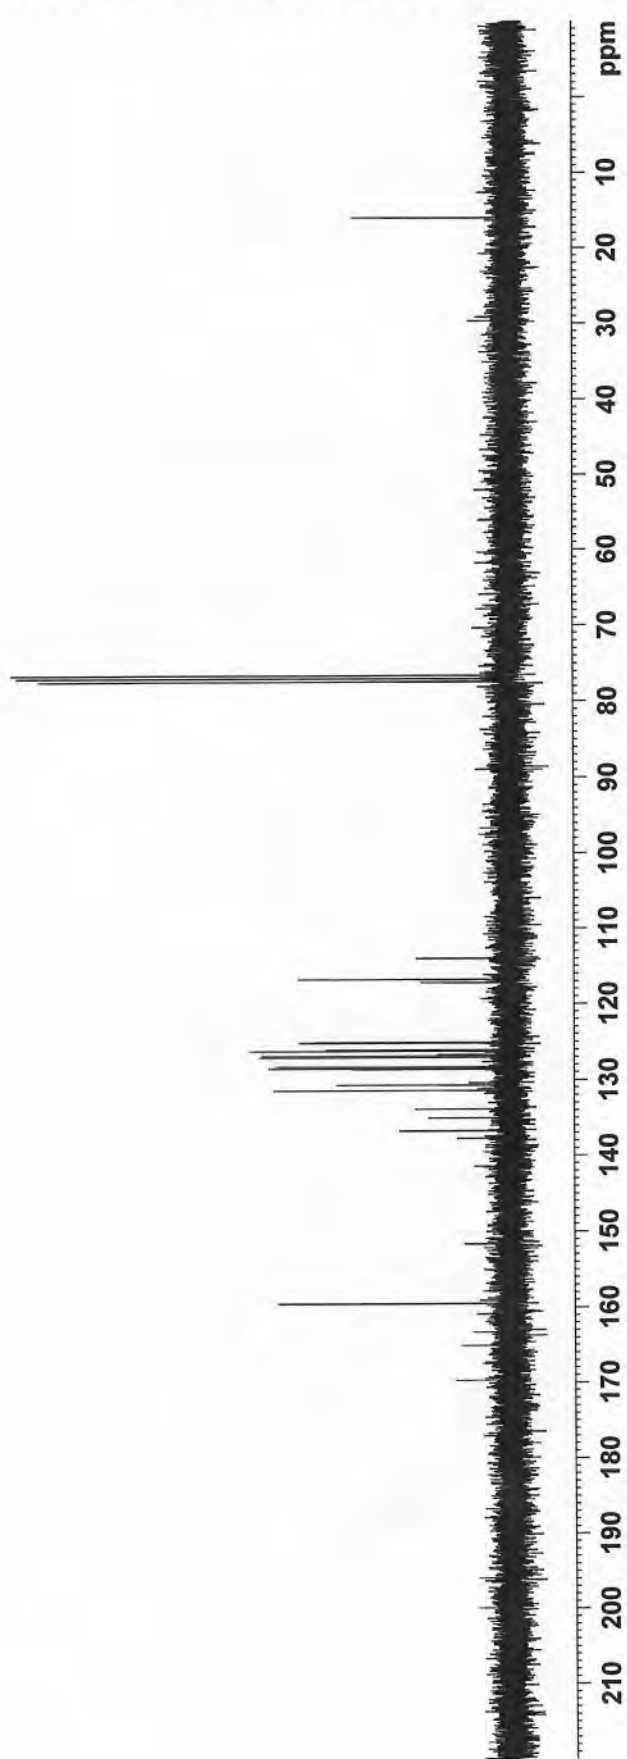

C5

SP131216-5 CDCL3 1HNMR AV300

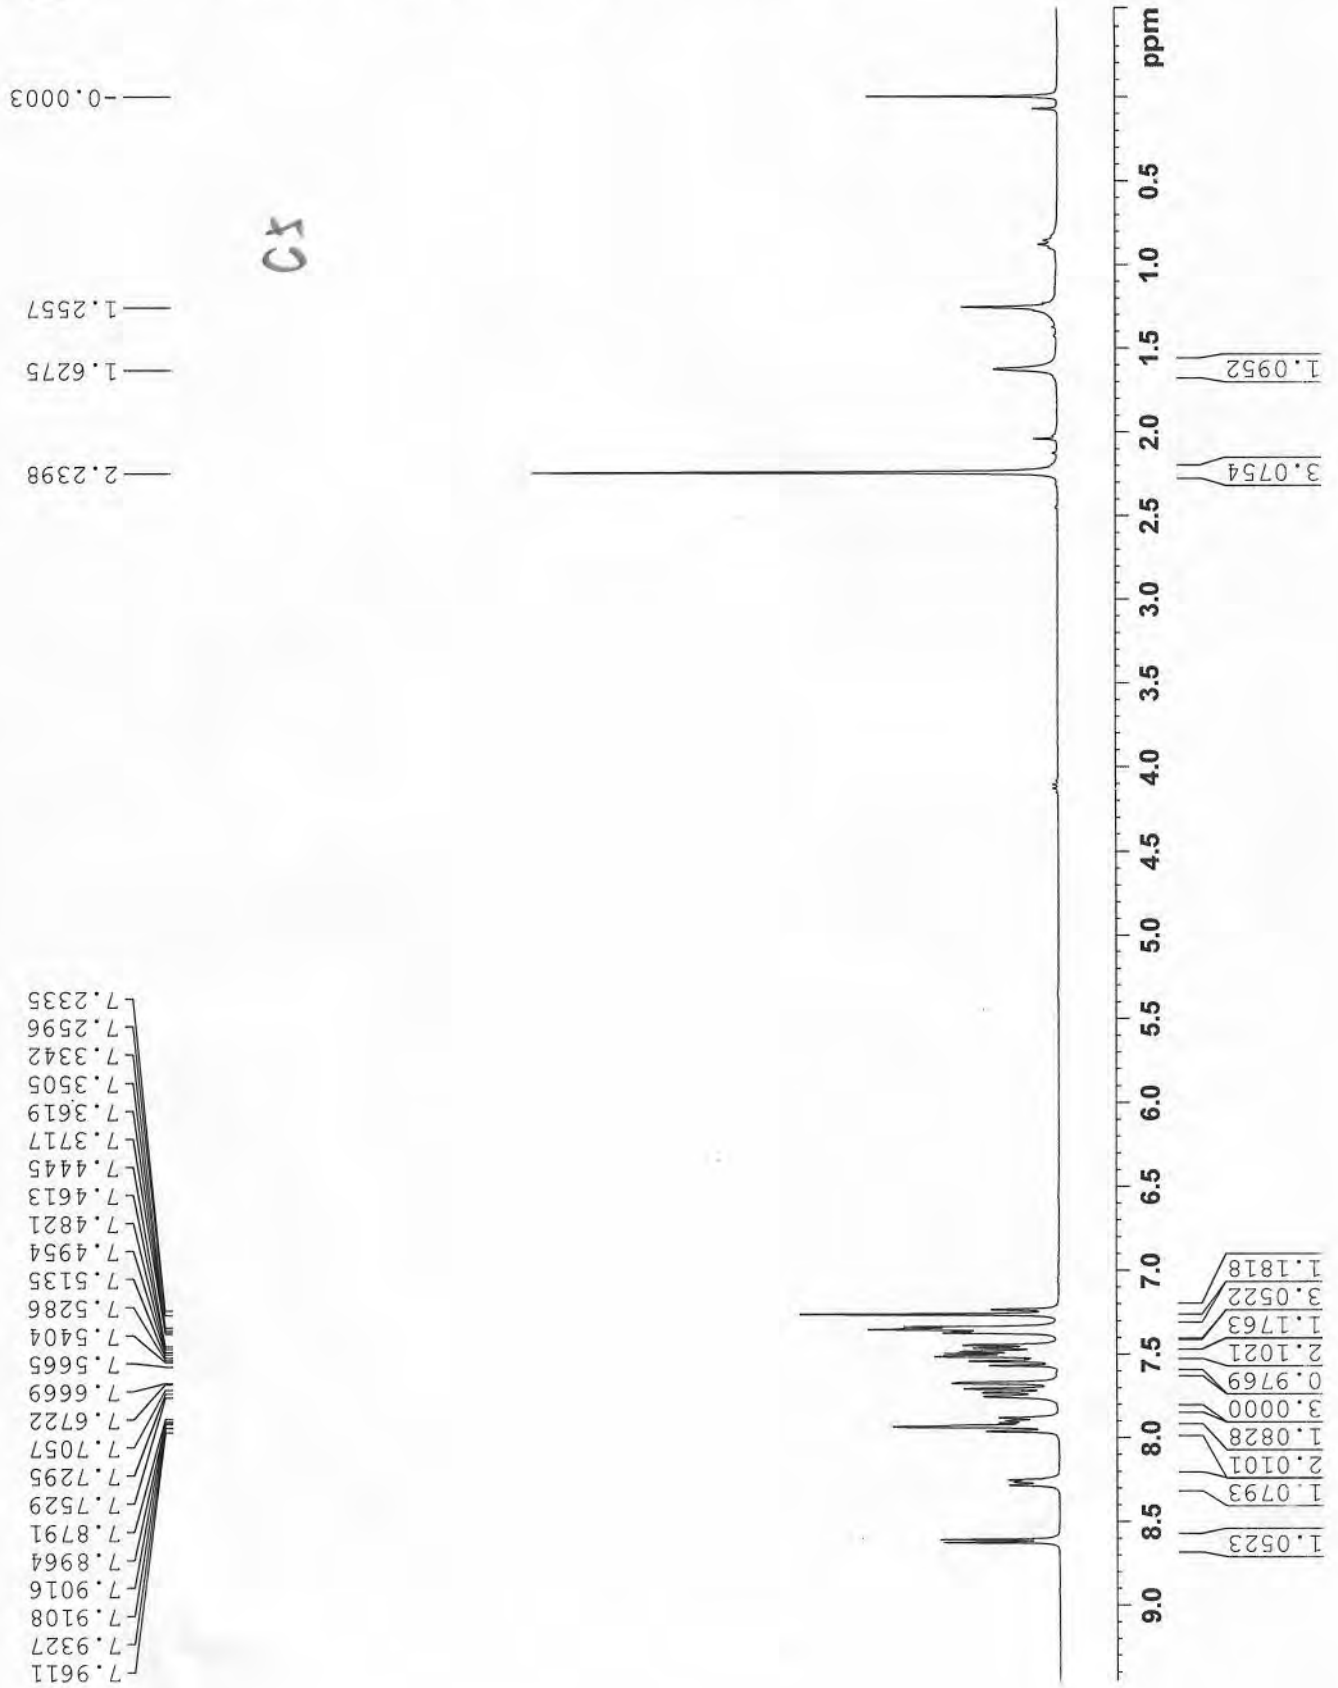

|                    |                     |                               |         |                        |                      |
|--------------------|---------------------|-------------------------------|---------|------------------------|----------------------|
| <b>Sample Name</b> |                     | <b>Position</b>               | p1A7    | <b>Instrument Name</b> | Instrument 1         |
| <b>User Name</b>   | QTOF-PC\QTOF        | <b>Inj Vol</b>                | 0.1     | <b>InjPosition</b>     |                      |
| <b>Sample Type</b> | Sample              | <b>IRM Calibration Status</b> | Success | <b>Data Filename</b>   | C5-p.d               |
| <b>ACQ Method</b>  | 20110418-MSonly-p.m | <b>Comment</b>                |         | <b>Acquired Time</b>   | 3/12/2018 4:05:27 PM |

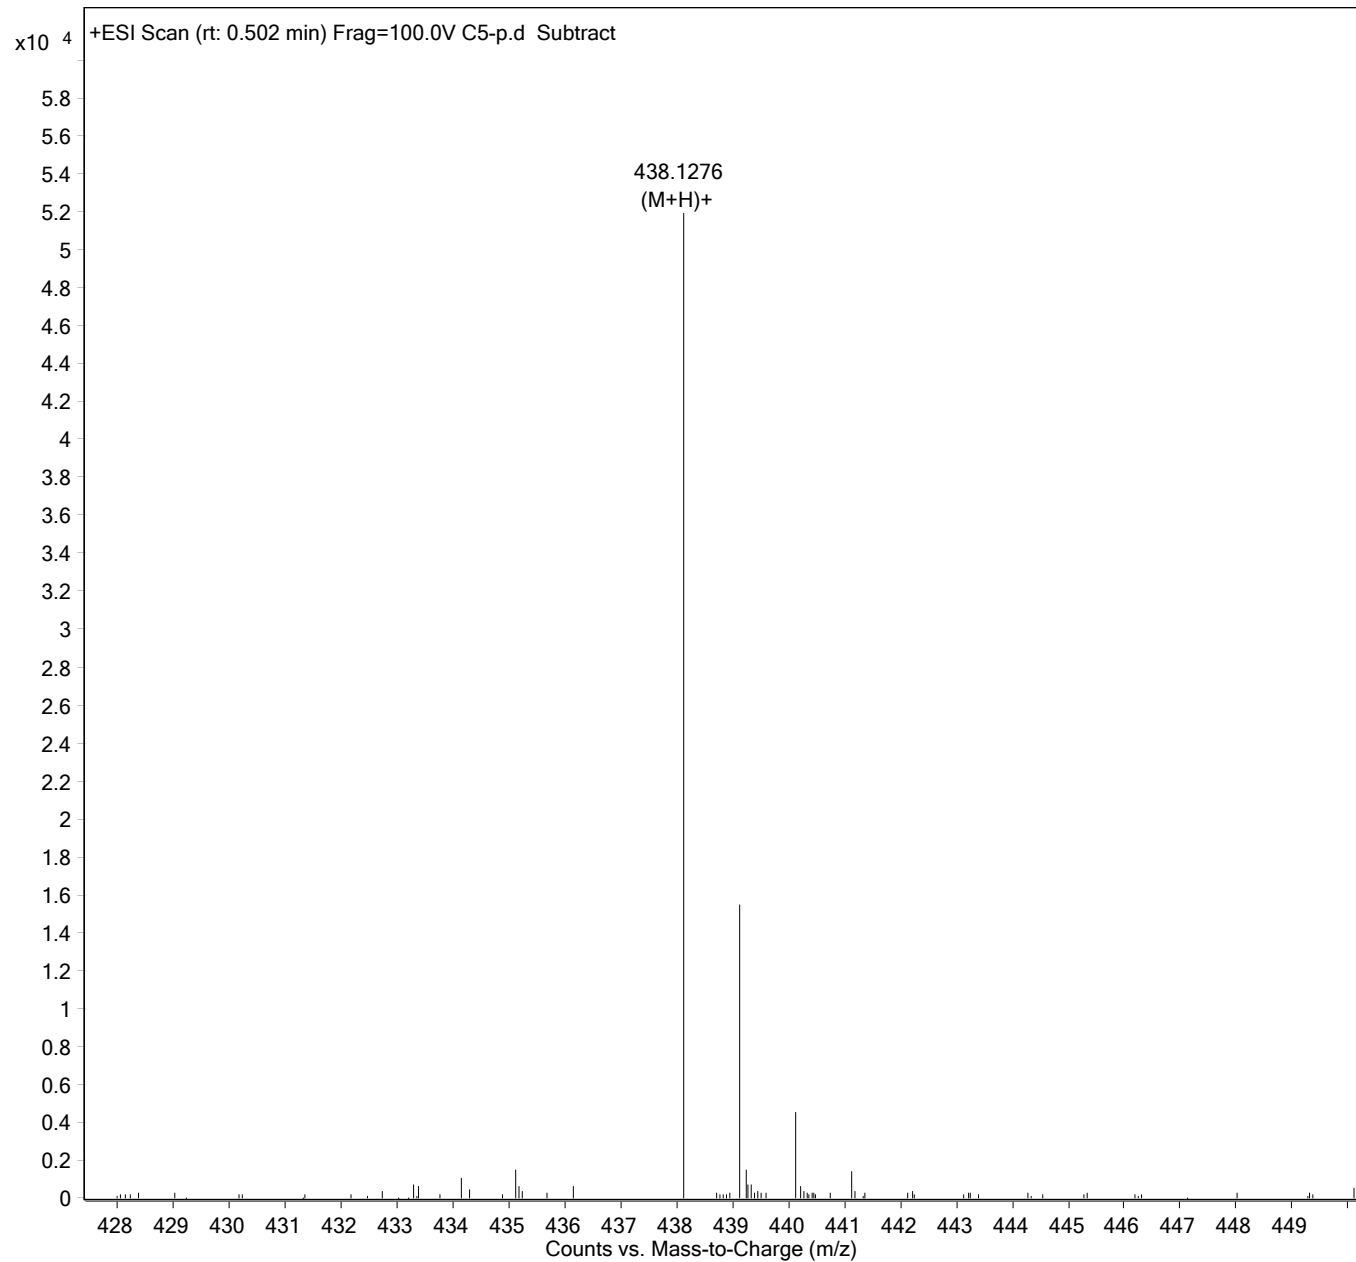

SP140310-1-C C13-NMR CDCL3 303K AV-300

169.731  
165.061  
164.914  
159.515  
151.514  
137.784  
137.041  
134.826  
133.816  
133.113  
131.385  
130.757  
130.331  
128.676  
128.581  
128.243  
127.065  
126.716  
126.248  
125.103  
125.010  
117.721  
116.861  
114.323

77.588  
77.165  
76.740

16.015

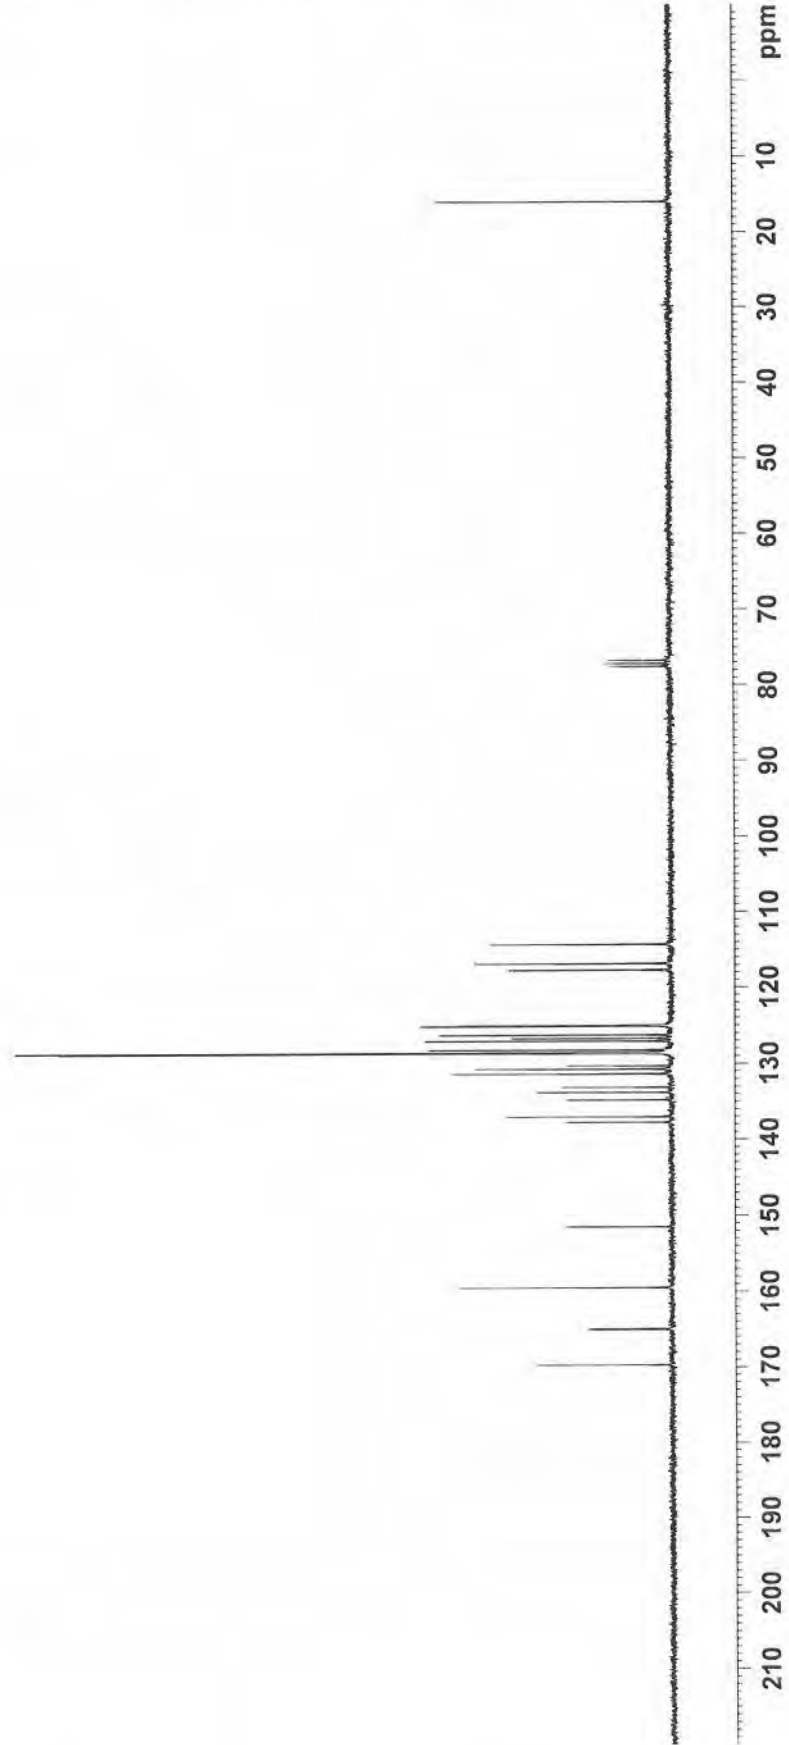

SP140310-1 CDCL3 1HNMR AV300

8.1811  
8.1584  
8.1504  
7.8661  
7.8387  
7.8284  
7.8195  
7.7970  
7.7617  
7.6210  
7.5924  
7.4576  
7.4343  
7.4231  
7.4090  
7.3758  
7.3480  
7.3428  
7.2422  
7.2251  
7.2155  
7.1873  
7.1548  
7.1272

2.1759

0.0003

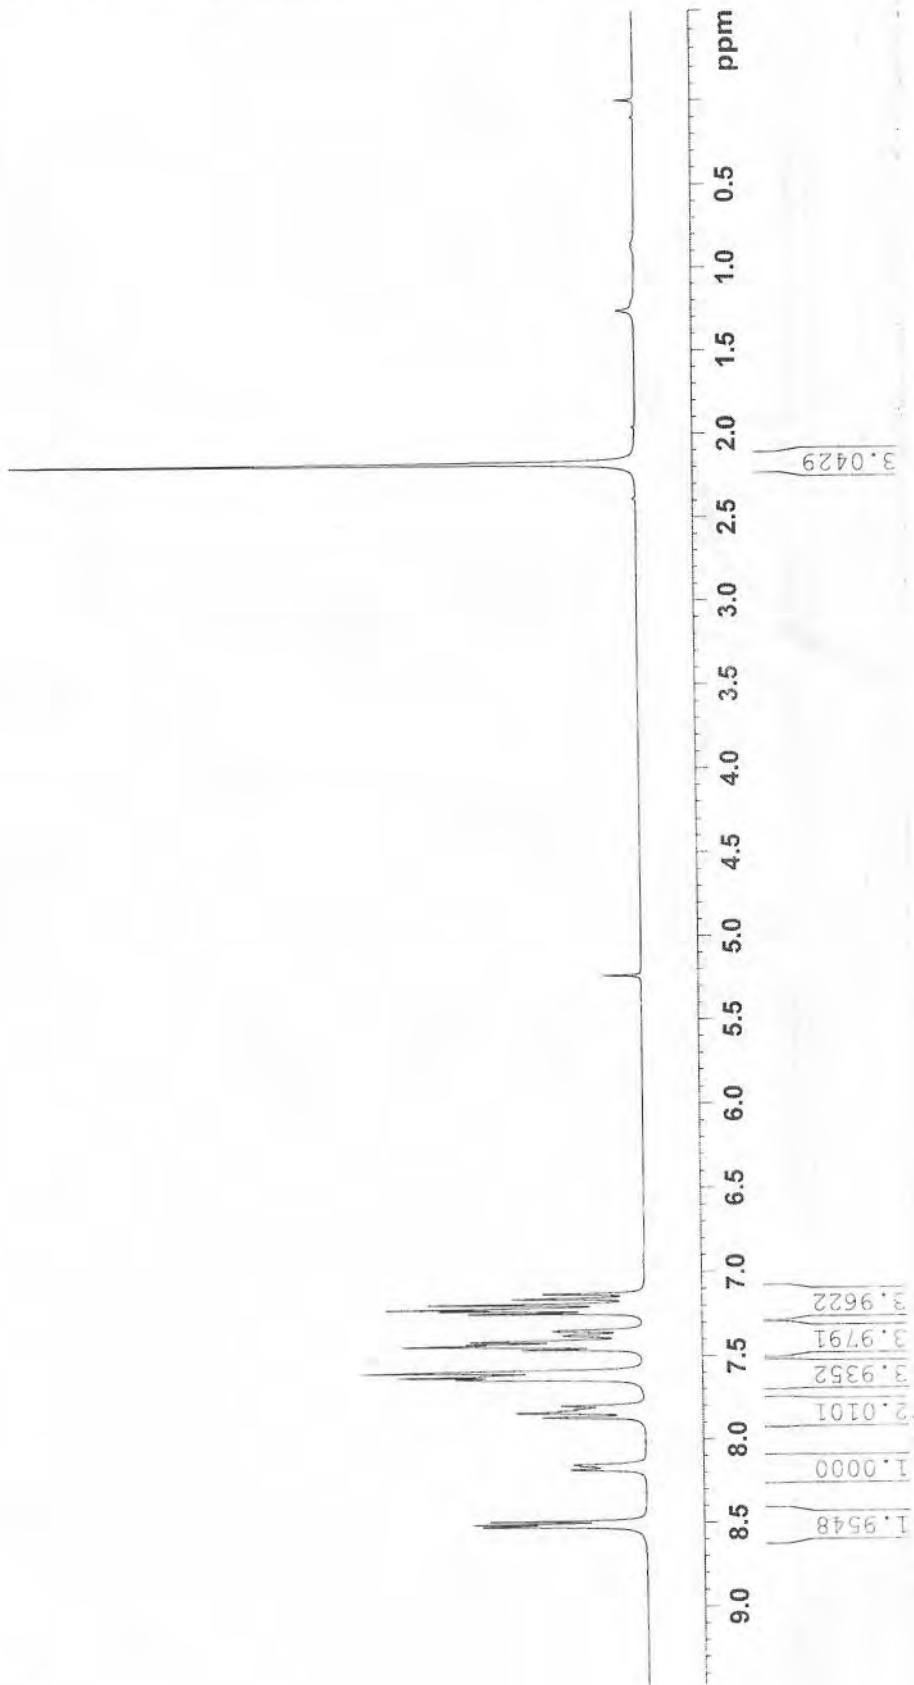

|                    |                     |                               |         |                        |                      |
|--------------------|---------------------|-------------------------------|---------|------------------------|----------------------|
| <b>Sample Name</b> |                     | <b>Position</b>               | p1A8    | <b>Instrument Name</b> | Instrument 1         |
| <b>User Name</b>   | QTOF-PC\QTOF        | <b>Inj Vol</b>                | 0.1     | <b>InjPosition</b>     |                      |
| <b>Sample Type</b> | Sample              | <b>IRM Calibration Status</b> | Success | <b>Data Filename</b>   | C6-p.d               |
| <b>ACQ Method</b>  | 20110418-MSonly-p.m | <b>Comment</b>                |         | <b>Acquired Time</b>   | 3/12/2018 4:11:03 PM |

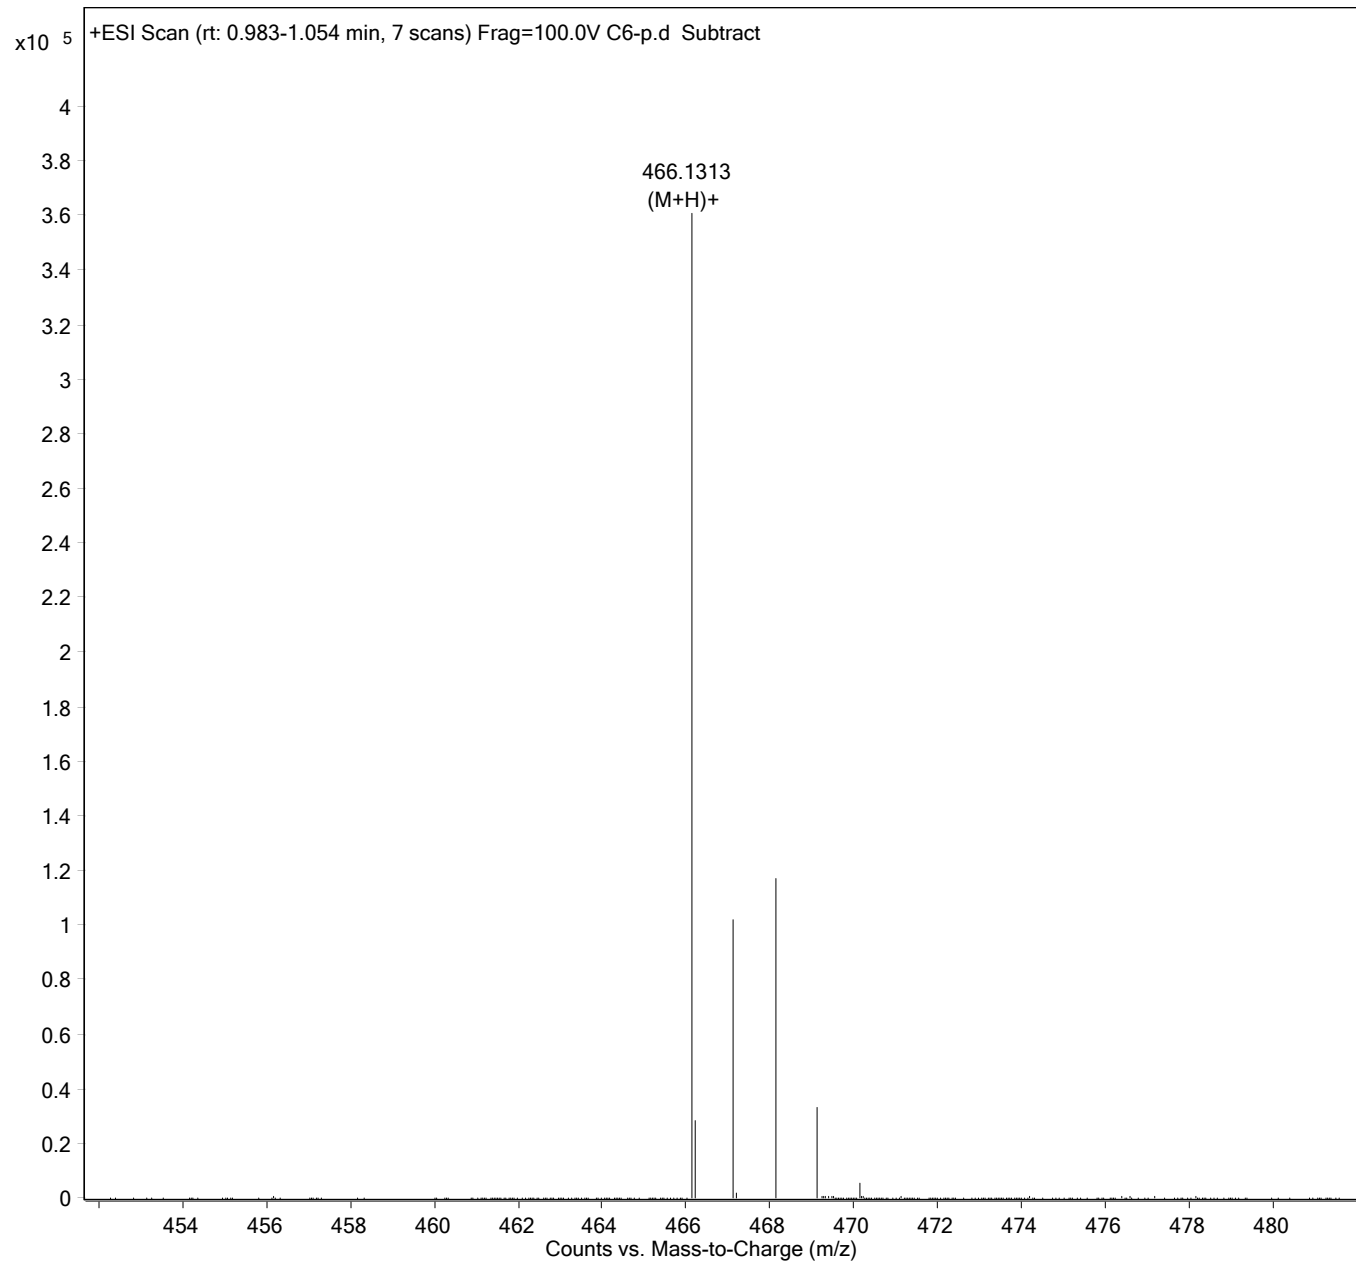



D1

SP131028-2-C C13-NMR CDCL3 303K AV-300

166.088  
164.935  
159.748  
158.190  
151.318  
151.101  
145.508  
137.254  
134.844  
131.611  
131.265  
128.487  
127.175  
126.490  
117.772  
114.212  
113.564  
112.706  
109.737

77.638  
77.213  
76.788

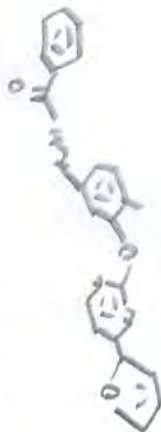

15.908

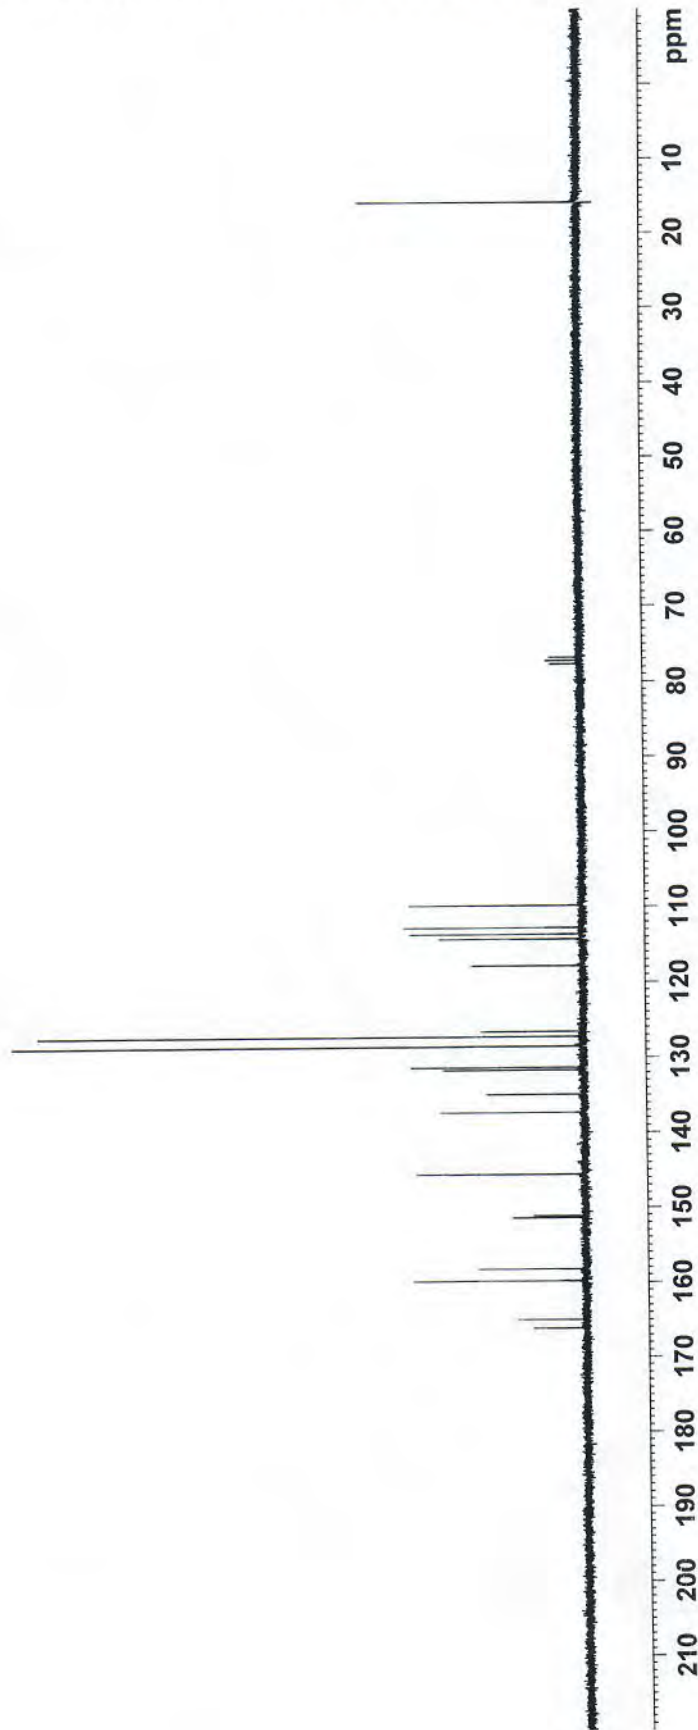

YZB180310-4 D1  
YZB180310-4 D1 CDCL3 1H NMR

AV300  
8.5777  
8.4505  
7.9944  
7.8346  
7.8098  
7.5996  
7.5178  
7.5012  
7.4959  
7.4652  
7.4381  
7.3282  
7.3104  
7.2976  
7.2646  
6.5763  
6.5707  
6.5651

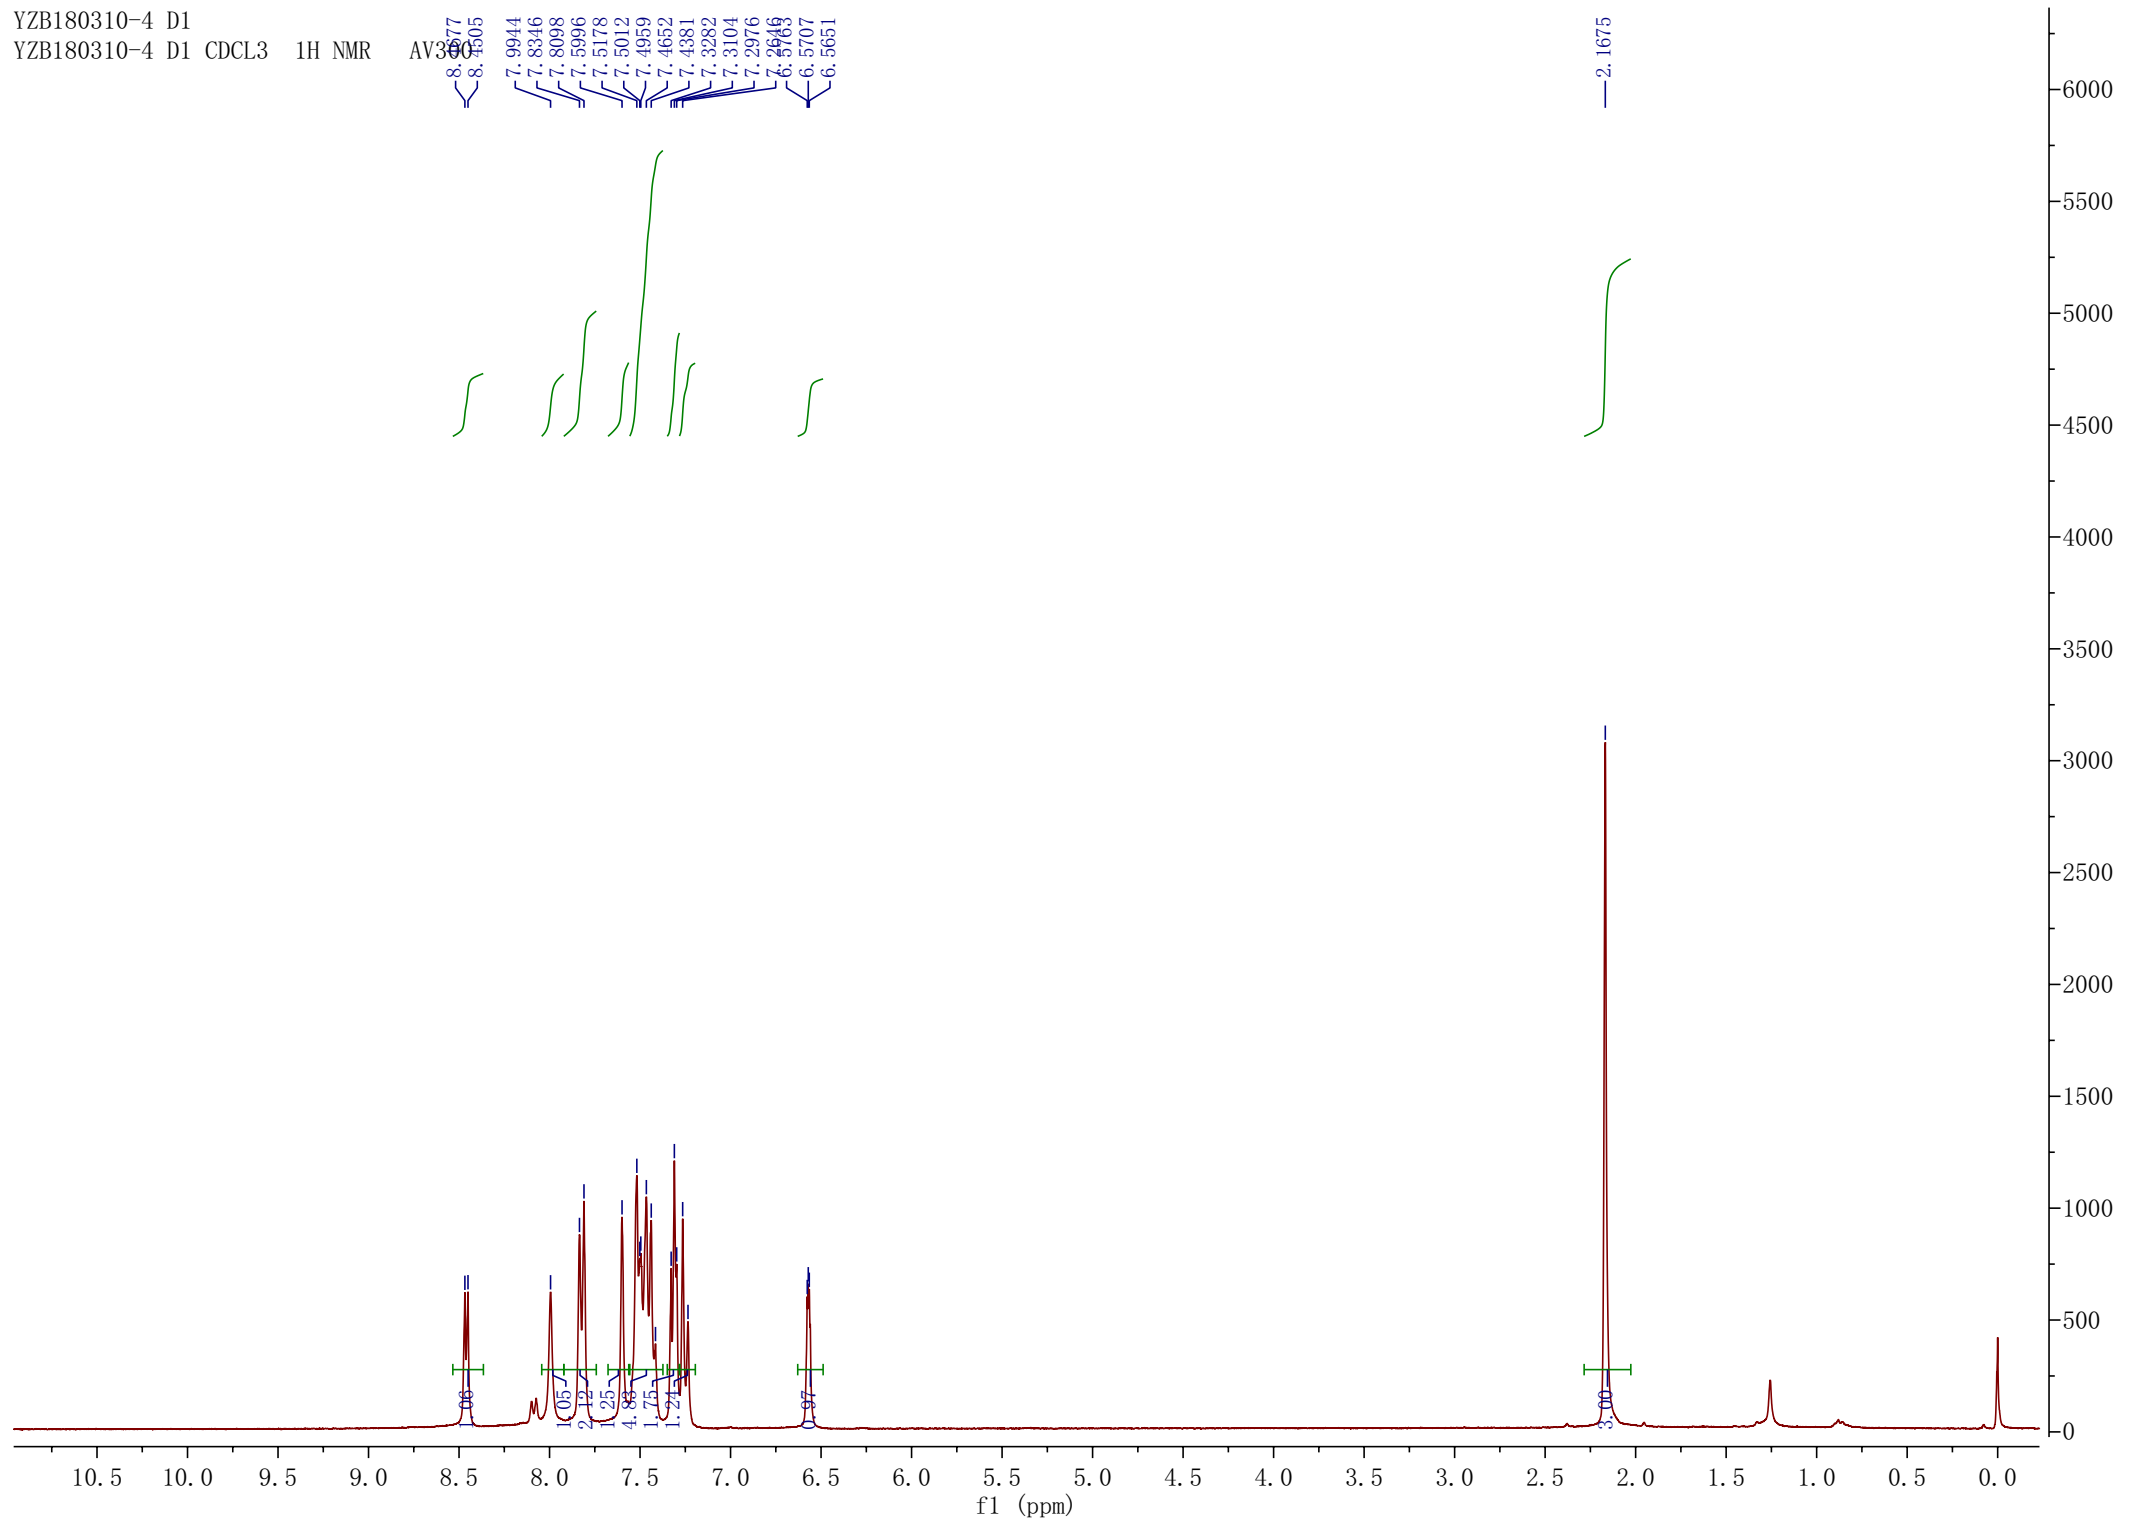

|                    |                     |                               |         |                        |                      |
|--------------------|---------------------|-------------------------------|---------|------------------------|----------------------|
| <b>Sample Name</b> |                     | <b>Position</b>               | p1A9    | <b>Instrument Name</b> | Instrument 1         |
| <b>User Name</b>   | QTOF-PC\QTOF        | <b>Inj Vol</b>                | 0.1     | <b>InjPosition</b>     |                      |
| <b>Sample Type</b> | Sample              | <b>IRM Calibration Status</b> | Success | <b>Data Filename</b>   | D1-p.d               |
| <b>ACQ Method</b>  | 20110418-MSonly-p.m | <b>Comment</b>                |         | <b>Acquired Time</b>   | 3/12/2018 4:13:43 PM |

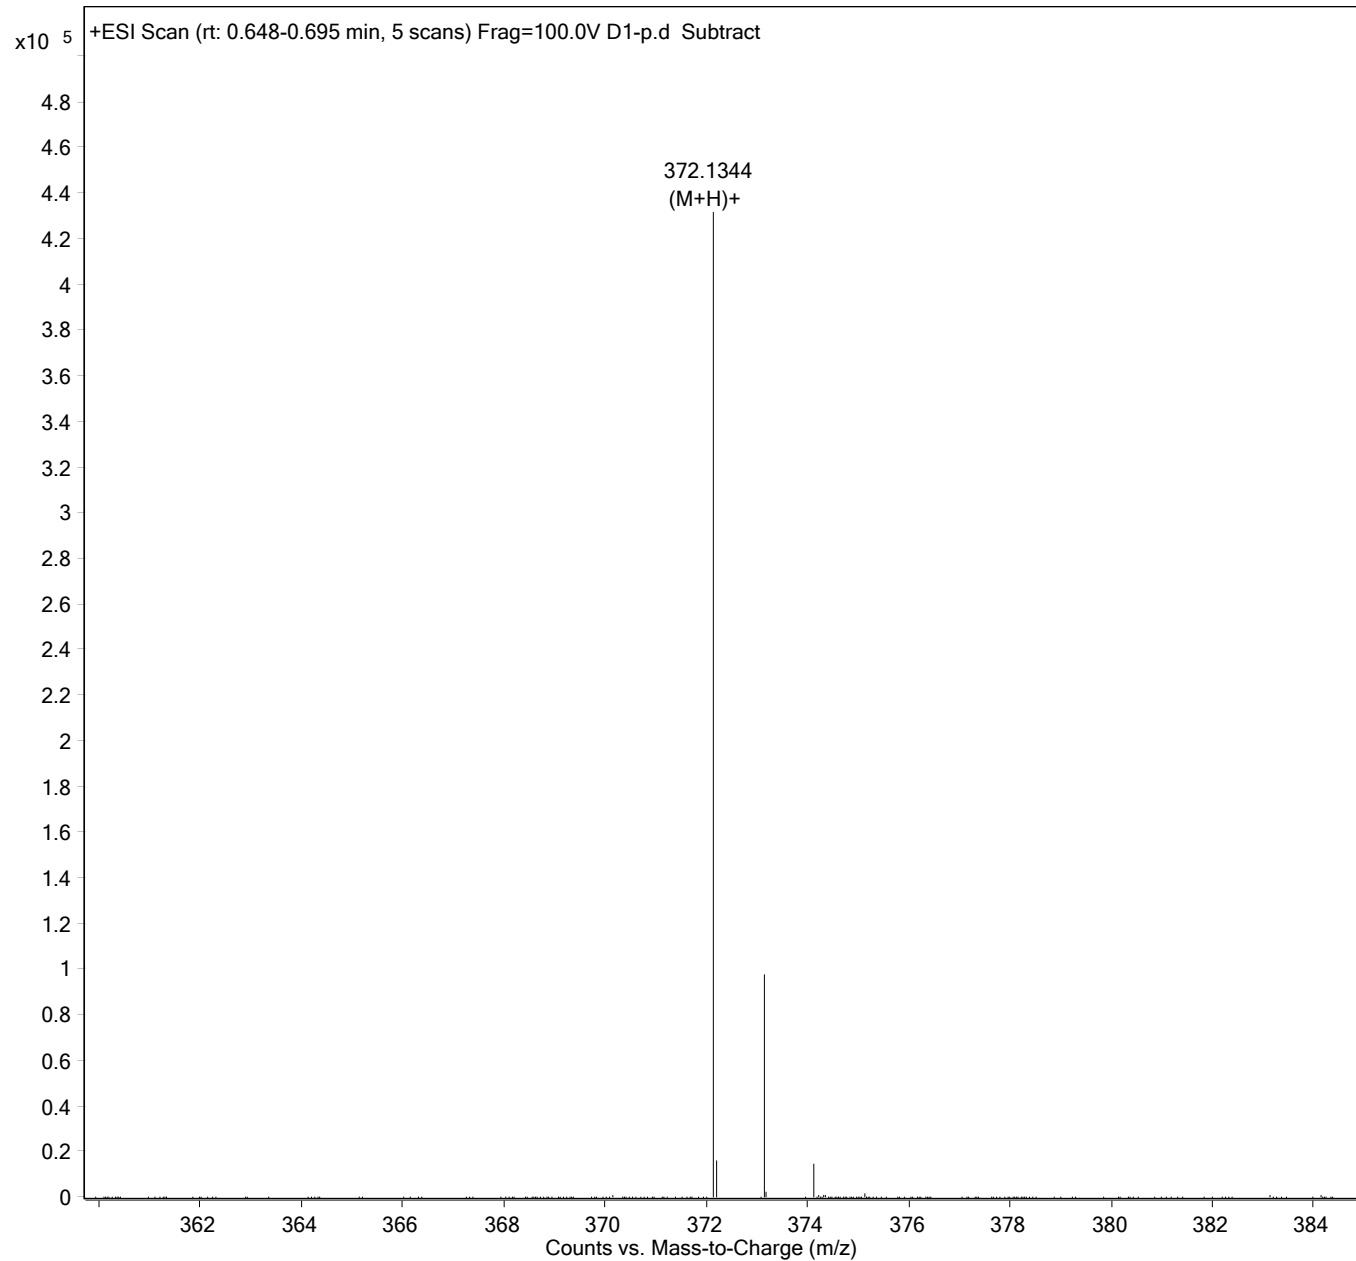

## SP130116-2-C C13-NMR CDCL3 303K AV-300

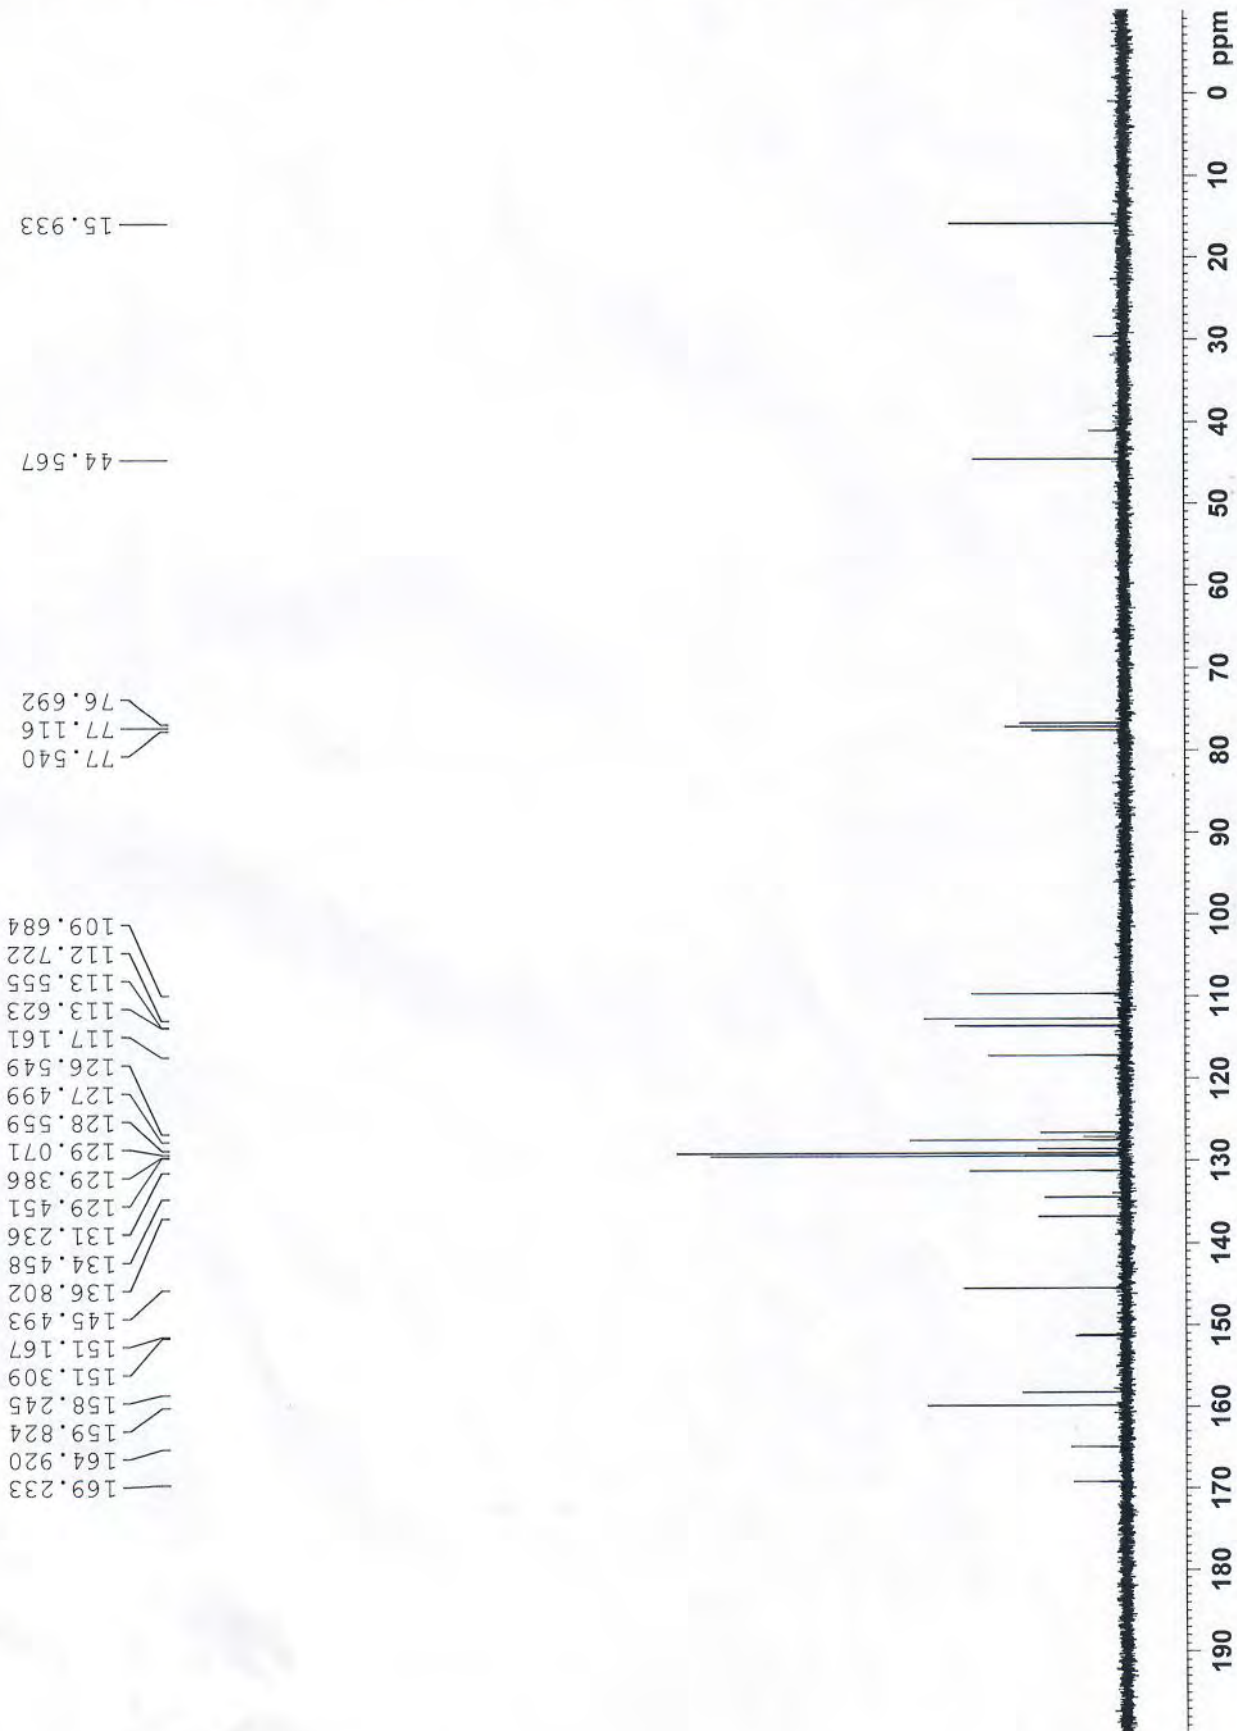

D2

SP130116-2 CDCL3 1HNMR AV300

8.4132  
8.3959  
8.6320  
7.5815  
7.5795  
7.5763  
7.5744  
7.3585  
7.3528  
7.3227  
7.3160  
7.3072  
7.2922  
7.2756  
7.2648  
7.2525  
7.1544  
7.1270  
6.5513  
6.5456  
6.5397  
6.5339

3.6416

2.1198

0.0068

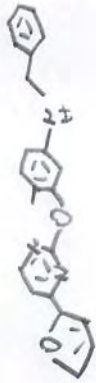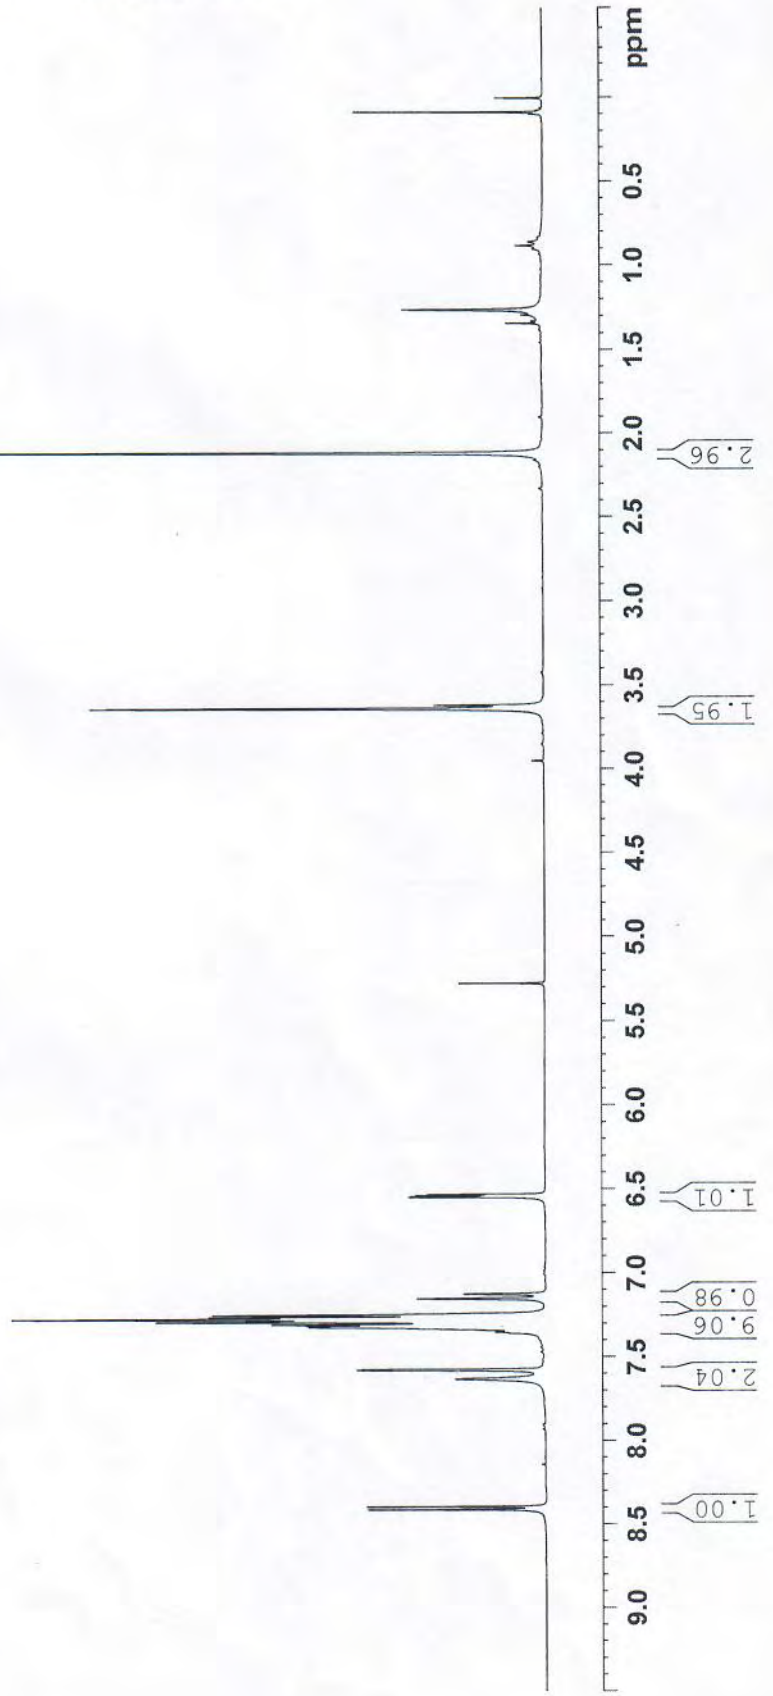

|                    |                     |                               |         |                        |                      |
|--------------------|---------------------|-------------------------------|---------|------------------------|----------------------|
| <b>Sample Name</b> |                     | <b>Position</b>               | p1B1    | <b>Instrument Name</b> | Instrument 1         |
| <b>User Name</b>   | QTOF-PC\QTOF        | <b>Inj Vol</b>                | 0.1     | <b>InjPosition</b>     |                      |
| <b>Sample Type</b> | Sample              | <b>IRM Calibration Status</b> | Success | <b>Data Filename</b>   | D2-p.d               |
| <b>ACQ Method</b>  | 20110418-MSonly-p.m | <b>Comment</b>                |         | <b>Acquired Time</b>   | 3/12/2018 4:16:05 PM |

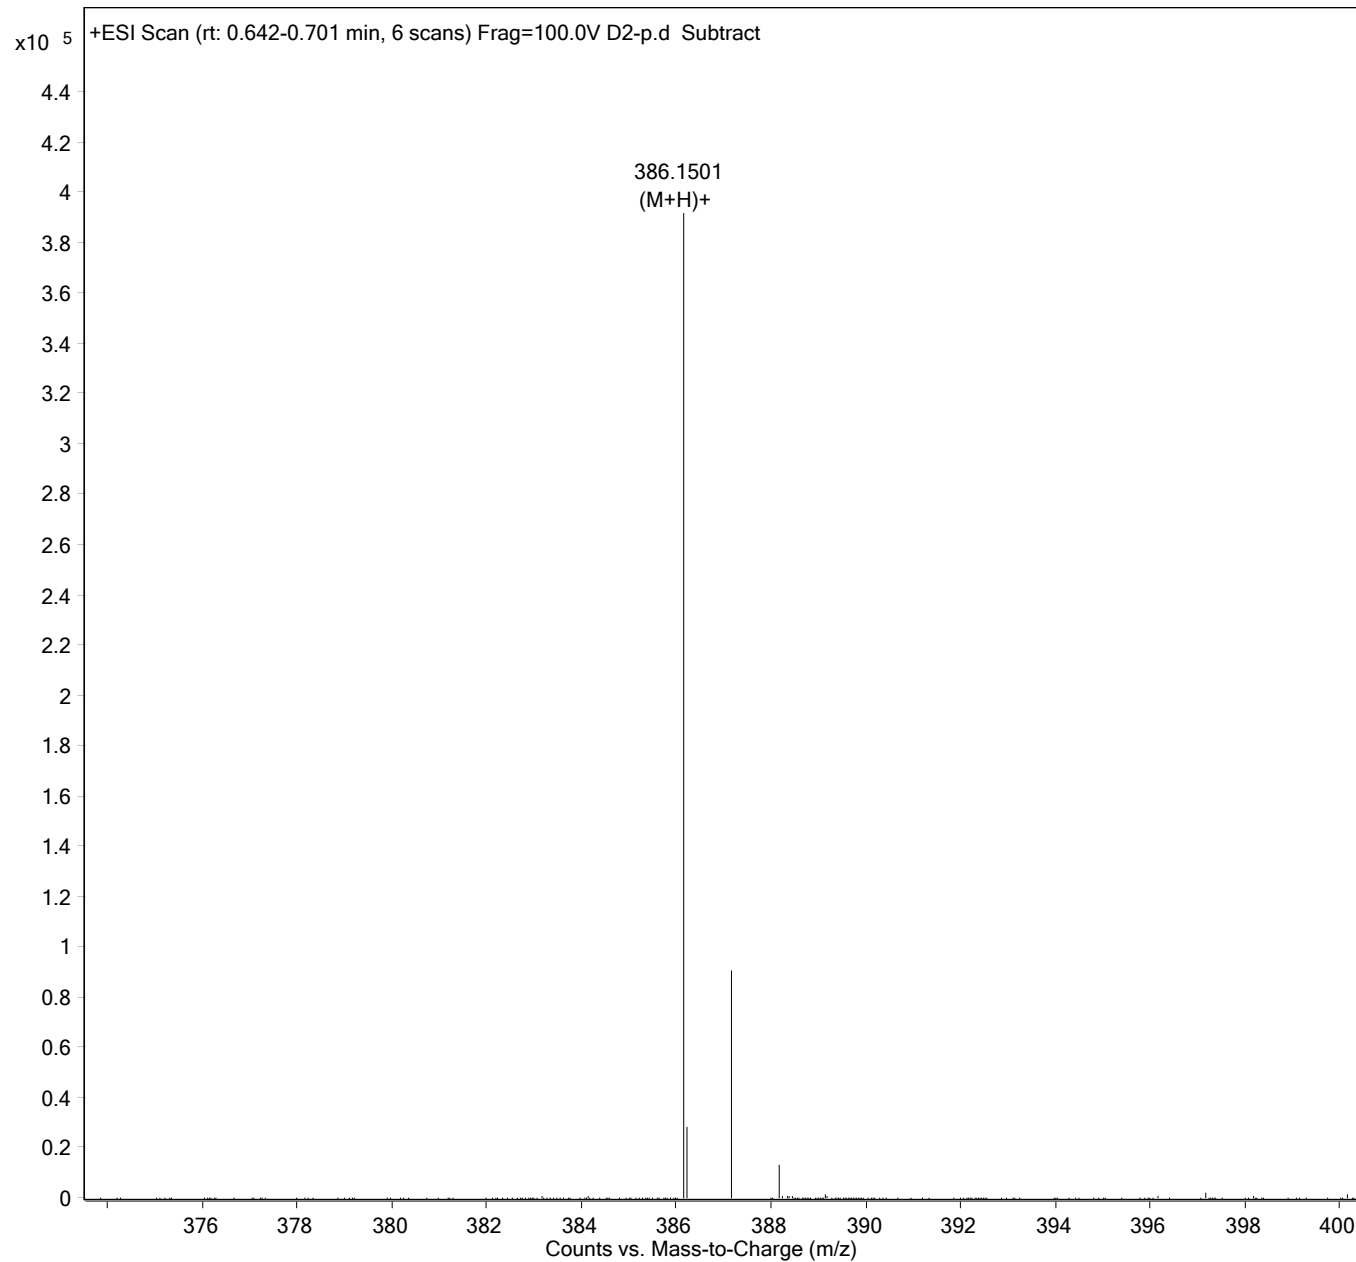

SP130116-4-C C13-NMR CDCL3 303K AV-300

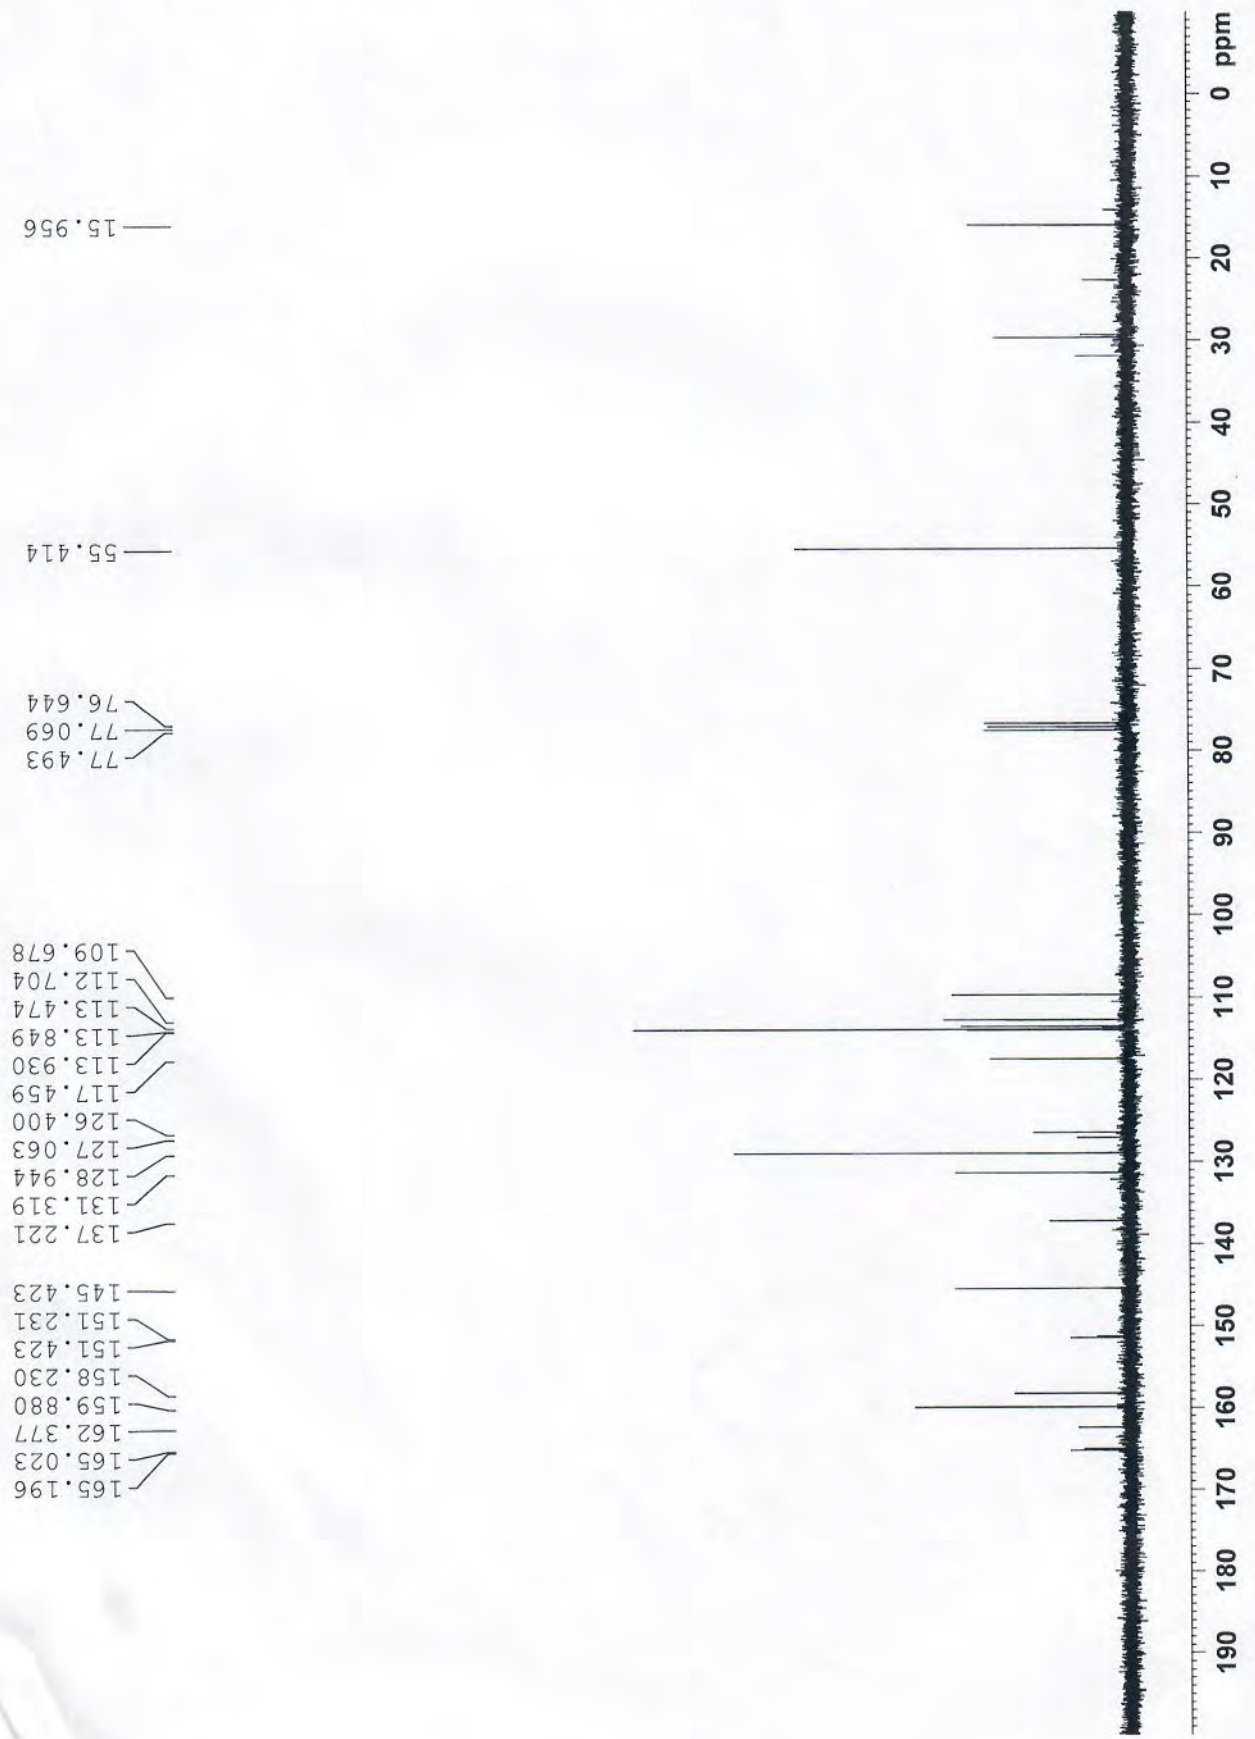

D3

SP130116-4 CDCL3 1HNMR AV300

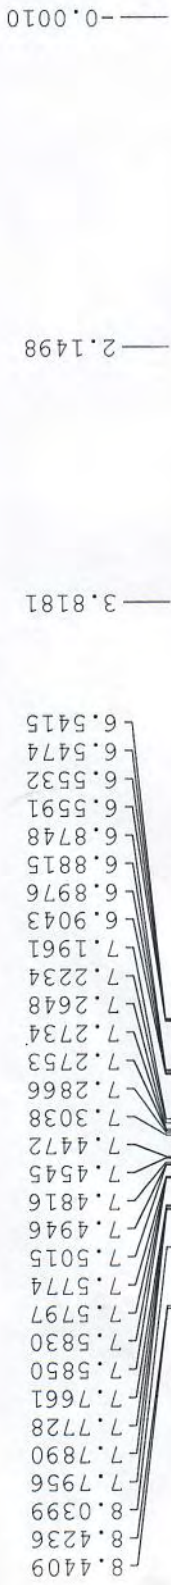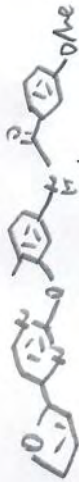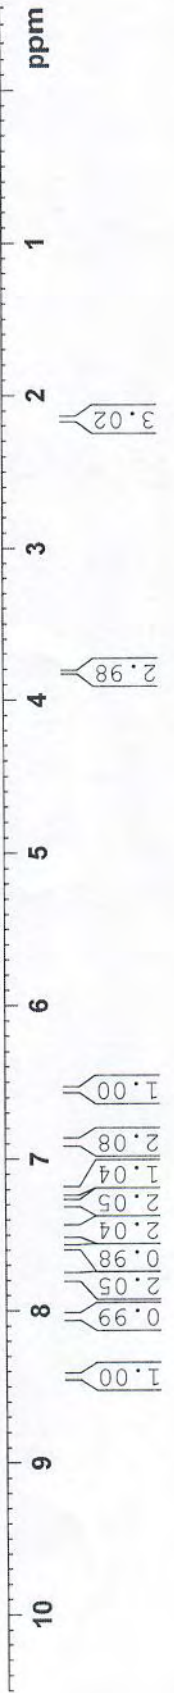



|                    |                     |                               |         |                        |                      |
|--------------------|---------------------|-------------------------------|---------|------------------------|----------------------|
| <b>Sample Name</b> |                     | <b>Position</b>               | p1B2    | <b>Instrument Name</b> | Instrument 1         |
| <b>User Name</b>   | QTOF-PC\QTOF        | <b>Inj Vol</b>                | 0.1     | <b>InjPosition</b>     |                      |
| <b>Sample Type</b> | Sample              | <b>IRM Calibration Status</b> | Success | <b>Data Filename</b>   | D3-p.d               |
| <b>ACQ Method</b>  | 20110418-MSonly-p.m | <b>Comment</b>                |         | <b>Acquired Time</b>   | 3/12/2018 4:18:57 PM |

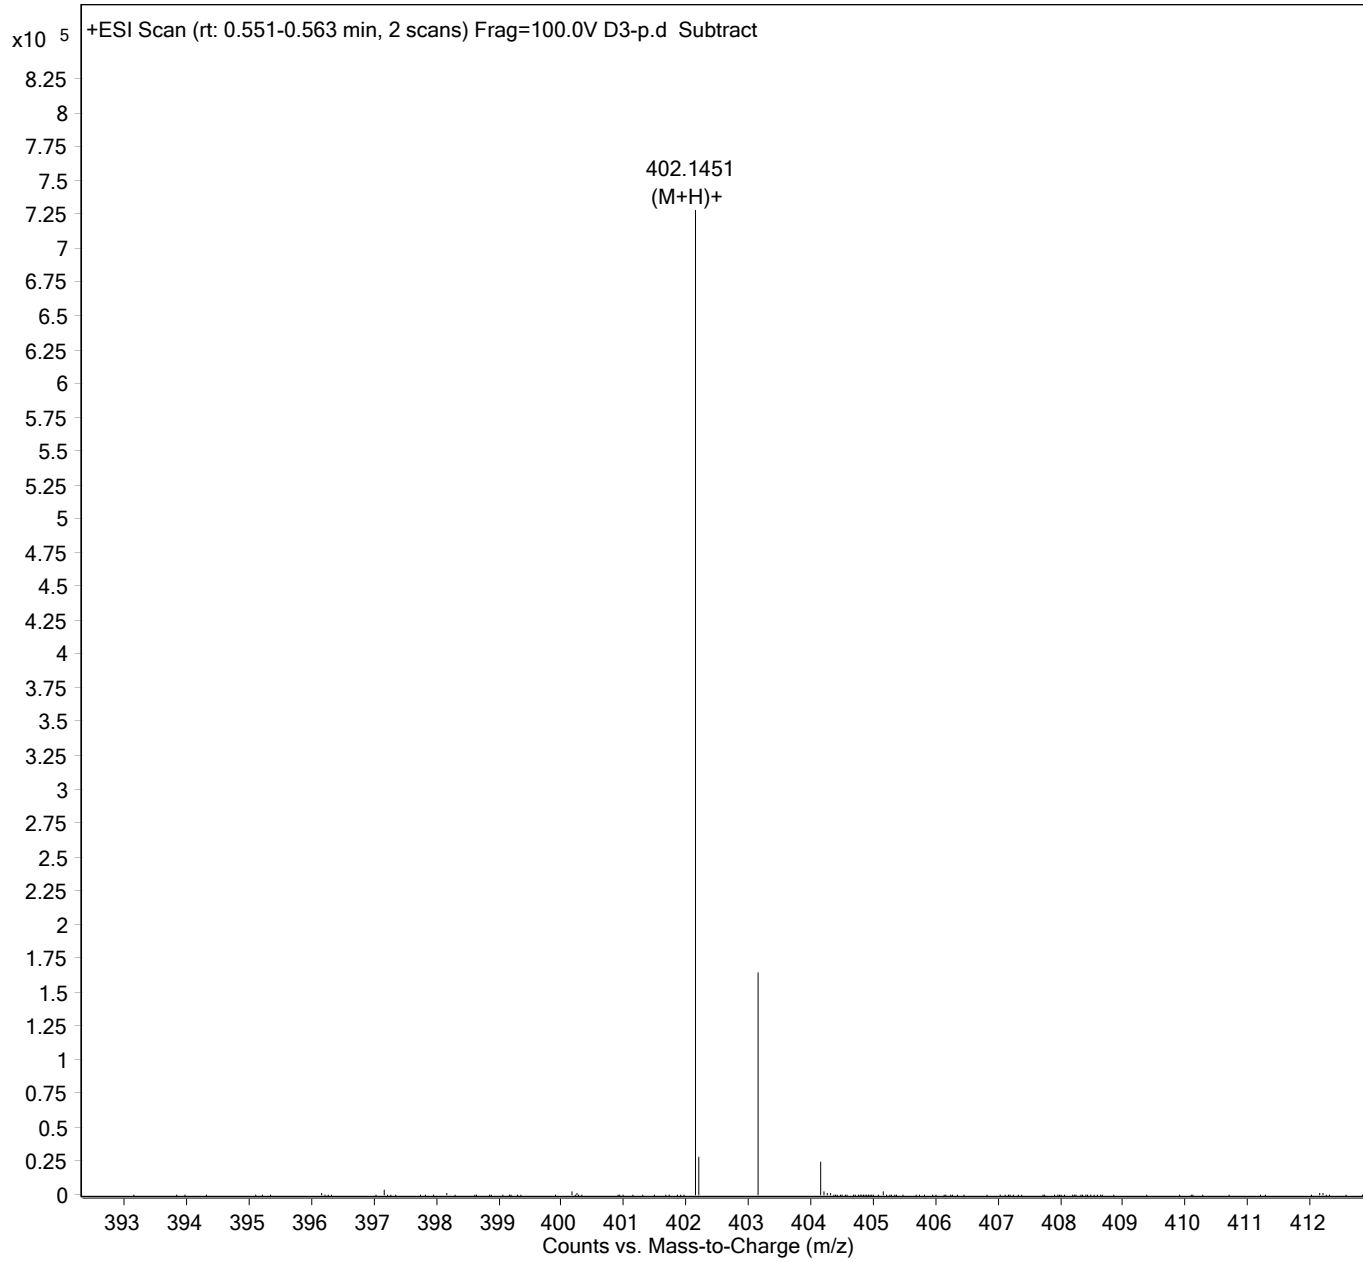

D4

SP130116-3-C C13-NMR CDCL3 303K AV-300

166.258  
164.917  
159.753  
158.182  
151.296  
151.090  
145.521  
138.340  
137.287  
134.810  
132.376  
131.252  
128.375  
127.900  
126.417  
124.169  
117.720  
114.159  
113.600  
112.721  
109.706

77.645  
77.219  
76.795

21.255  
15.907

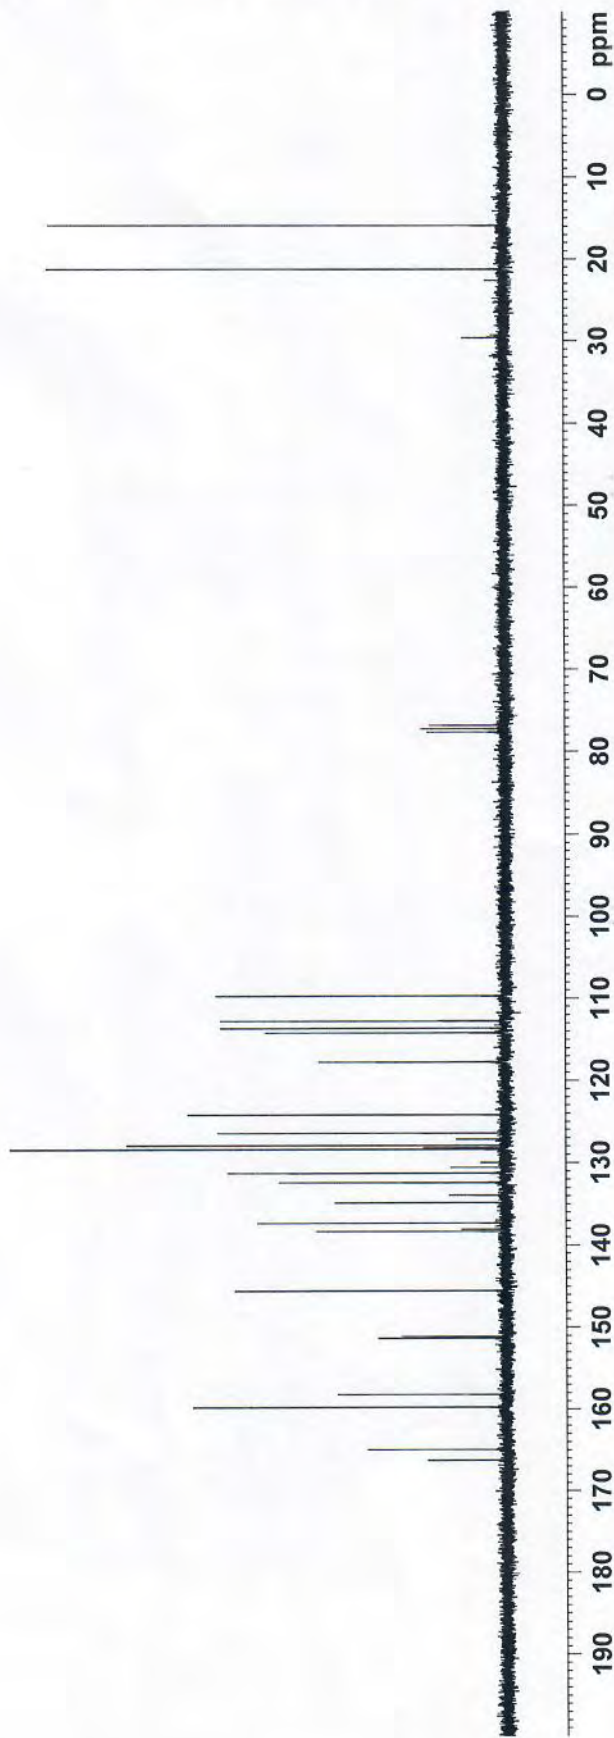



|                    |                     |                               |         |                        |                      |
|--------------------|---------------------|-------------------------------|---------|------------------------|----------------------|
| <b>Sample Name</b> |                     | <b>Position</b>               | p1B3    | <b>Instrument Name</b> | Instrument 1         |
| <b>User Name</b>   | QTOF-PC\QTOF        | <b>Inj Vol</b>                | 0.1     | <b>InjPosition</b>     |                      |
| <b>Sample Type</b> | Sample              | <b>IRM Calibration Status</b> | Success | <b>Data Filename</b>   | D4-p.d               |
| <b>ACQ Method</b>  | 20110418-MSonly-p.m | <b>Comment</b>                |         | <b>Acquired Time</b>   | 3/12/2018 4:21:07 PM |

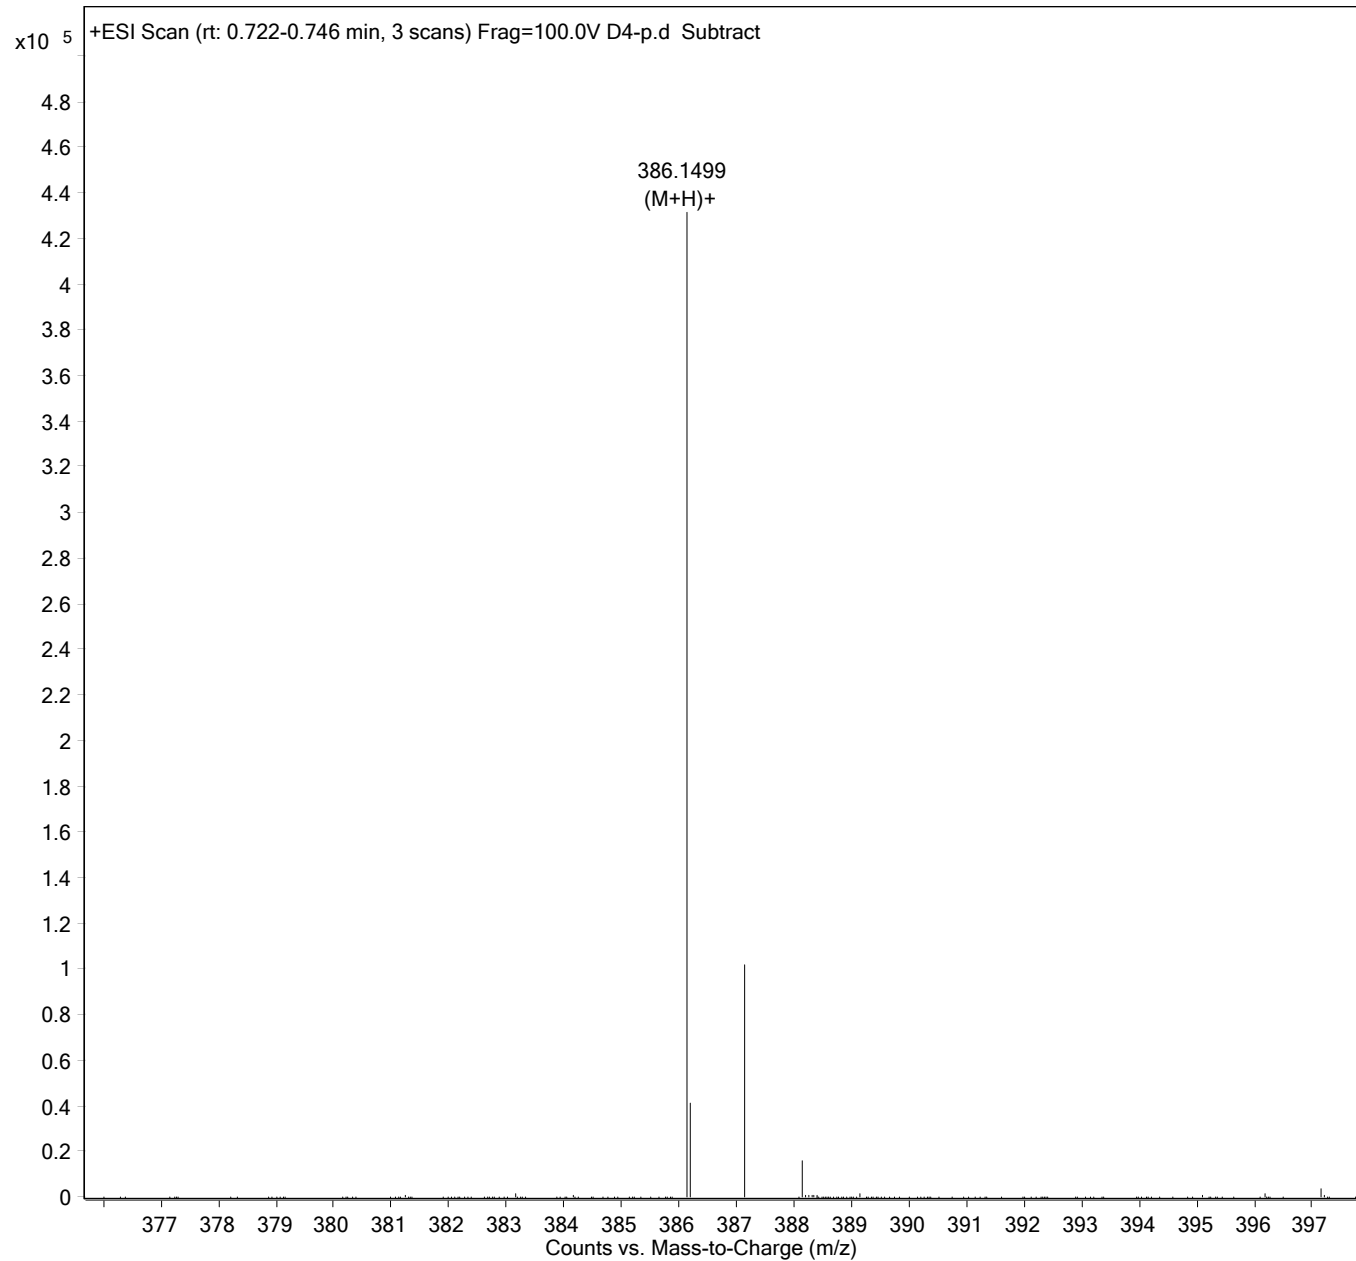

D5

SP130116-5-C C13-NMR CDCL3 303K AV-300

164.895  
164.678  
159.729  
158.214  
151.270  
151.054  
145.544  
136.923  
136.646  
134.592  
131.576  
131.337  
129.821  
127.473  
126.827  
125.311  
117.791  
114.220  
113.616  
112.733  
109.806

77.577  
77.154  
76.730

15.911

190 180 170 160 150 140 130 120 110 100 90 80 70 60 50 40 30 20 10 0 ppm

D5

SP130116-5 CDCL3 1HNMR AV300

-0.0014

2.0803

6.5130  
6.5188  
6.5247  
6.5305  
7.1283  
7.1582  
7.2228  
7.2285  
7.2301  
7.2403  
7.2419  
7.2486  
7.2639  
7.2753  
7.2812  
7.3520  
7.3553  
7.3584  
7.3617  
7.3785  
7.3819  
7.3851  
7.3882  
7.4676  
7.4745  
7.4849  
7.5536  
7.5555  
7.5588  
7.6179  
7.6440  
7.7373  
7.7431  
7.7488  
8.3729  
8.3903  
8.6230

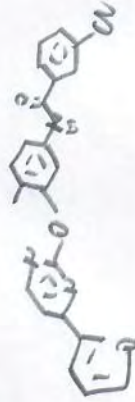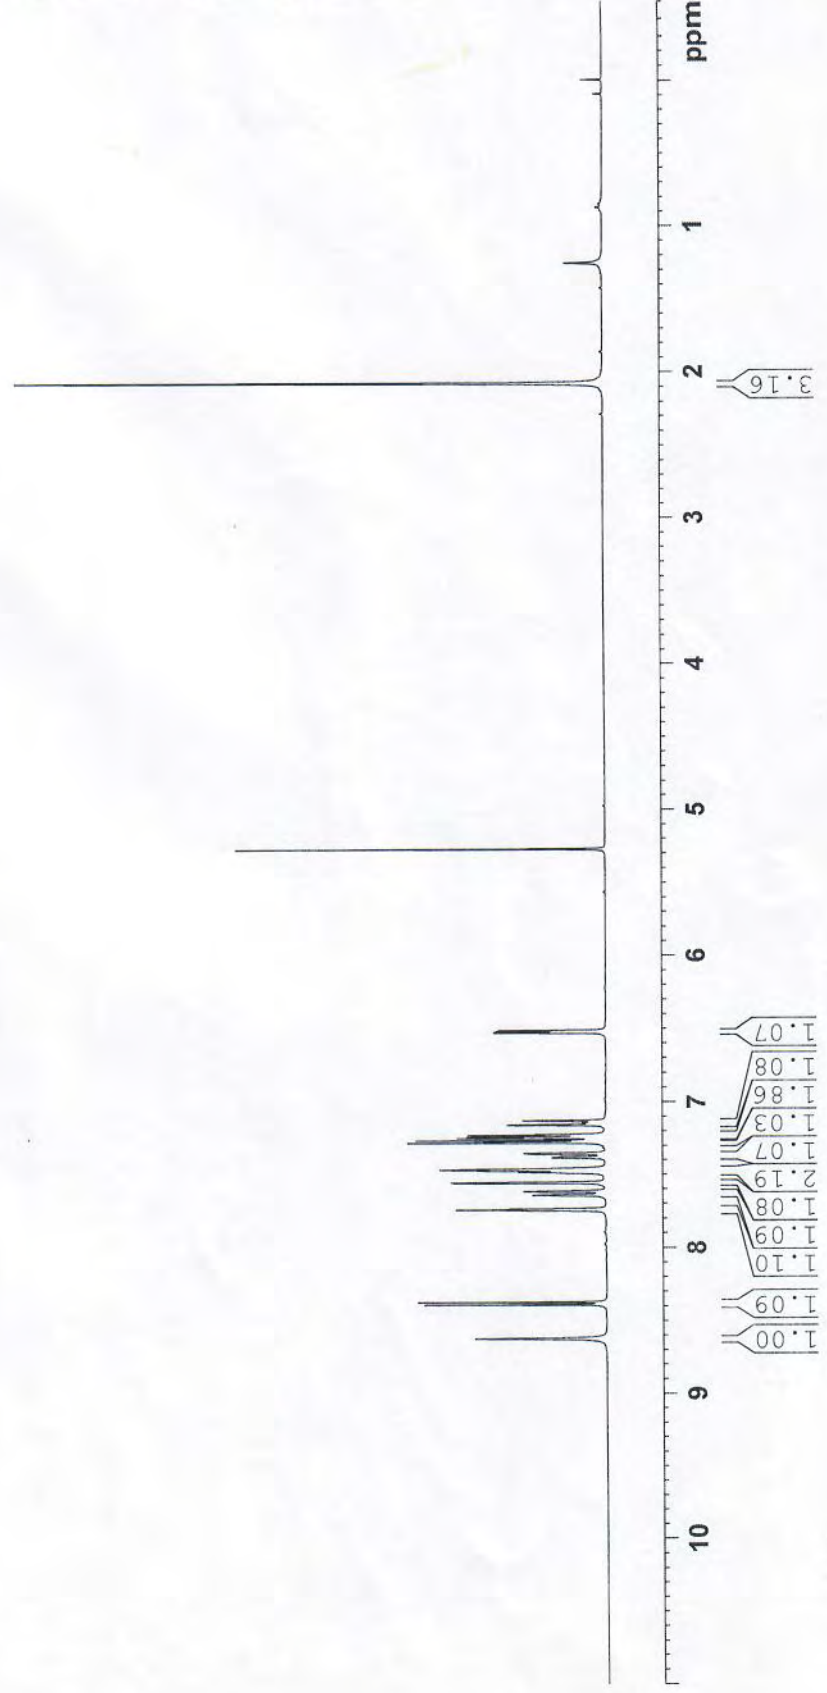

|                    |                     |                               |         |                        |                      |
|--------------------|---------------------|-------------------------------|---------|------------------------|----------------------|
| <b>Sample Name</b> |                     | <b>Position</b>               | p1B4    | <b>Instrument Name</b> | Instrument 1         |
| <b>User Name</b>   | QTOF-PC\QTOF        | <b>Inj Vol</b>                | 0.1     | <b>InjPosition</b>     |                      |
| <b>Sample Type</b> | Sample              | <b>IRM Calibration Status</b> | Success | <b>Data Filename</b>   | D5-p.d               |
| <b>ACQ Method</b>  | 20110418-MSonly-p.m | <b>Comment</b>                |         | <b>Acquired Time</b>   | 3/12/2018 4:23:06 PM |

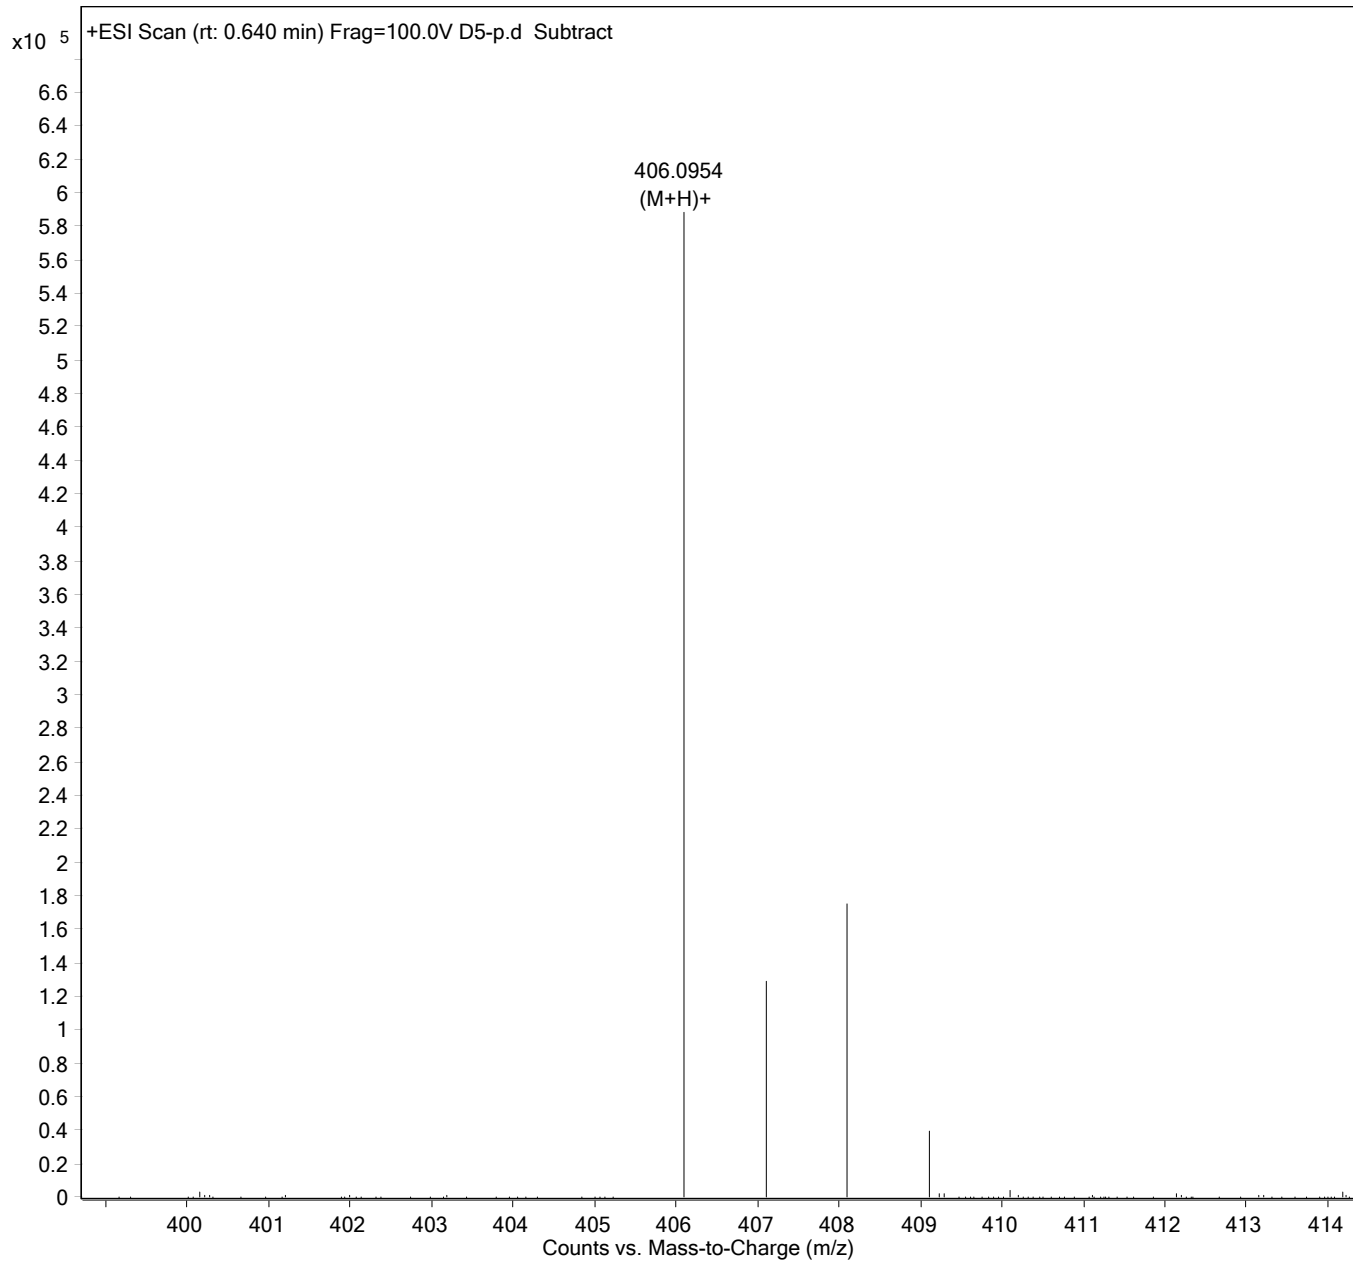

D6

SP140310-2-C C13-NMR CDCL3 303K AV-300

165.018  
164.896  
159.724  
158.232  
151.300  
151.062  
145.541  
137.836  
136.974  
133.171  
131.339  
128.712  
128.656  
126.789  
117.834  
114.251  
113.614  
112.735  
109.799  
77.567  
77.143  
76.720  
15.936

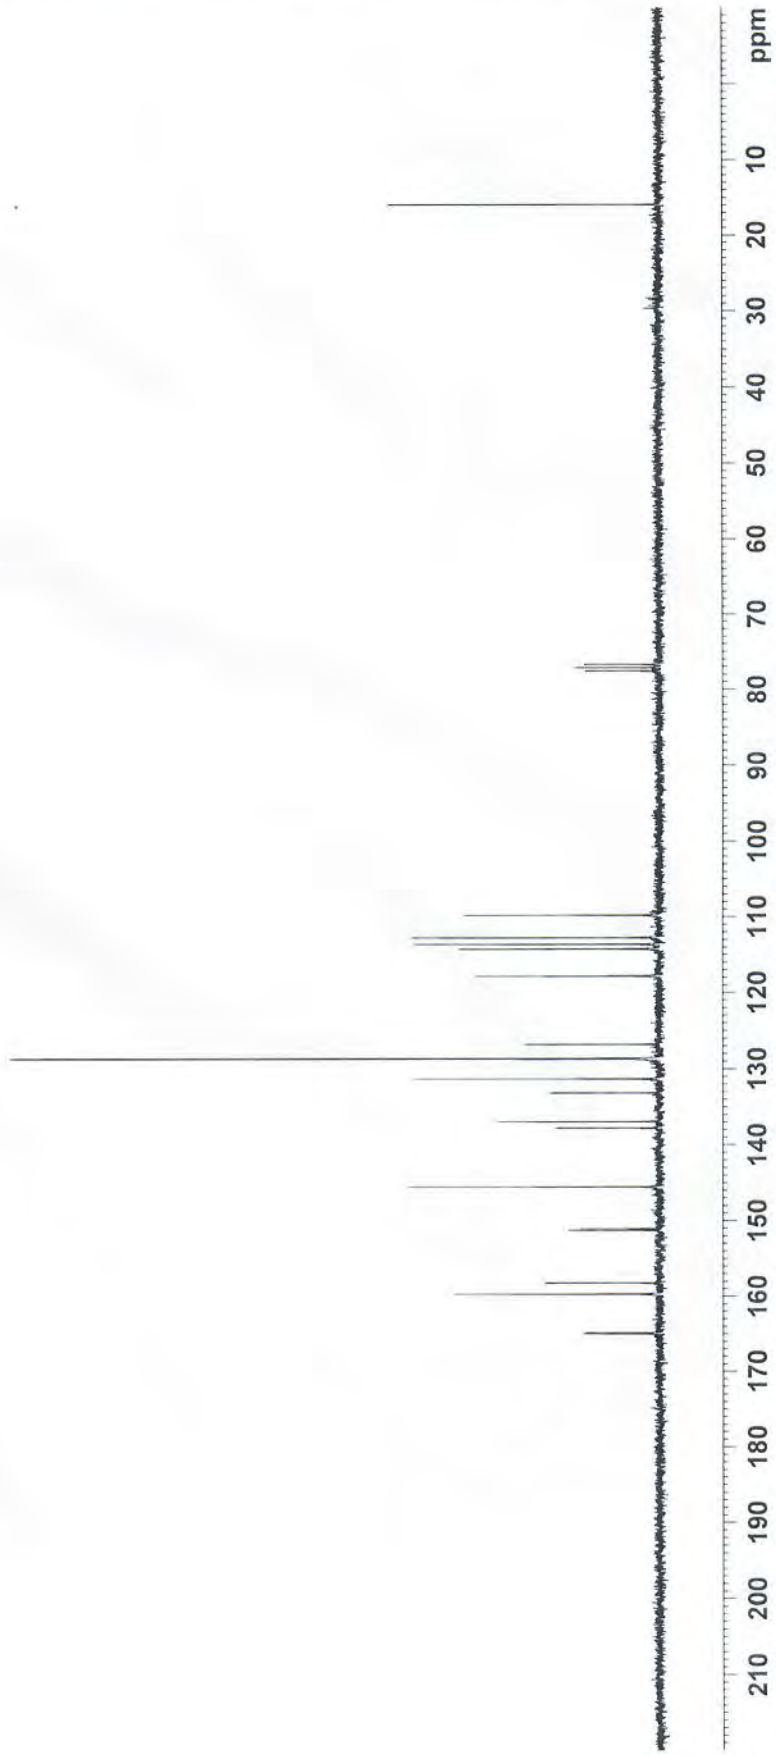



SPI40310-2 CDCL3 1HNMR AV300

0.0951  
-0.0003

2.1042

8.6004  
8.3787  
8.3617  
7.7110  
7.6830  
7.5613  
7.4709  
7.4472  
7.2907  
7.2755  
7.2616  
7.2485  
7.2366  
7.1640  
7.1358  
6.5287  
6.5233

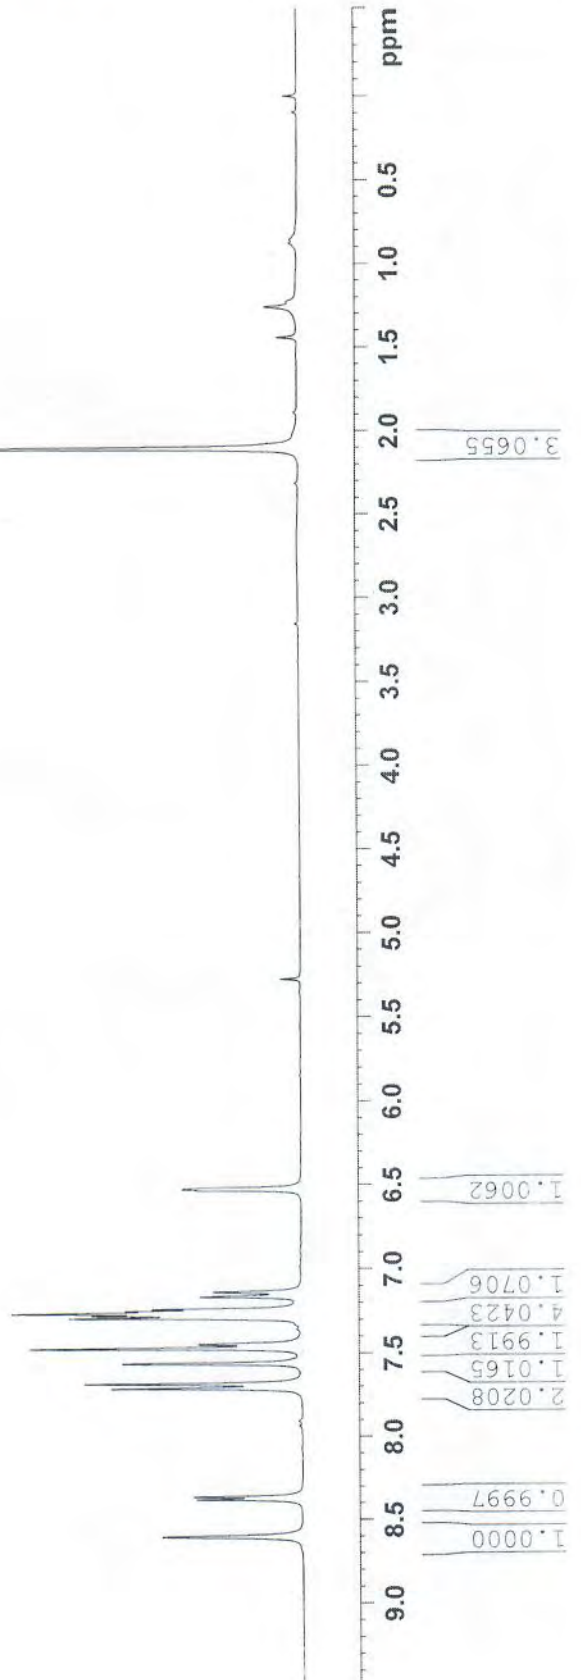

D6

|                    |                     |                               |         |                        |                      |
|--------------------|---------------------|-------------------------------|---------|------------------------|----------------------|
| <b>Sample Name</b> |                     | <b>Position</b>               | p185    | <b>Instrument Name</b> | Instrument 1         |
| <b>User Name</b>   | QTOF-PC\QTOF        | <b>Inj Vol</b>                | 0.1     | <b>InjPosition</b>     |                      |
| <b>Sample Type</b> | Sample              | <b>IRM Calibration Status</b> | Success | <b>Data Filename</b>   | D6-p.d               |
| <b>ACQ Method</b>  | 20110418-MSonly-p.m | <b>Comment</b>                |         | <b>Acquired Time</b>   | 3/12/2018 4:25:23 PM |

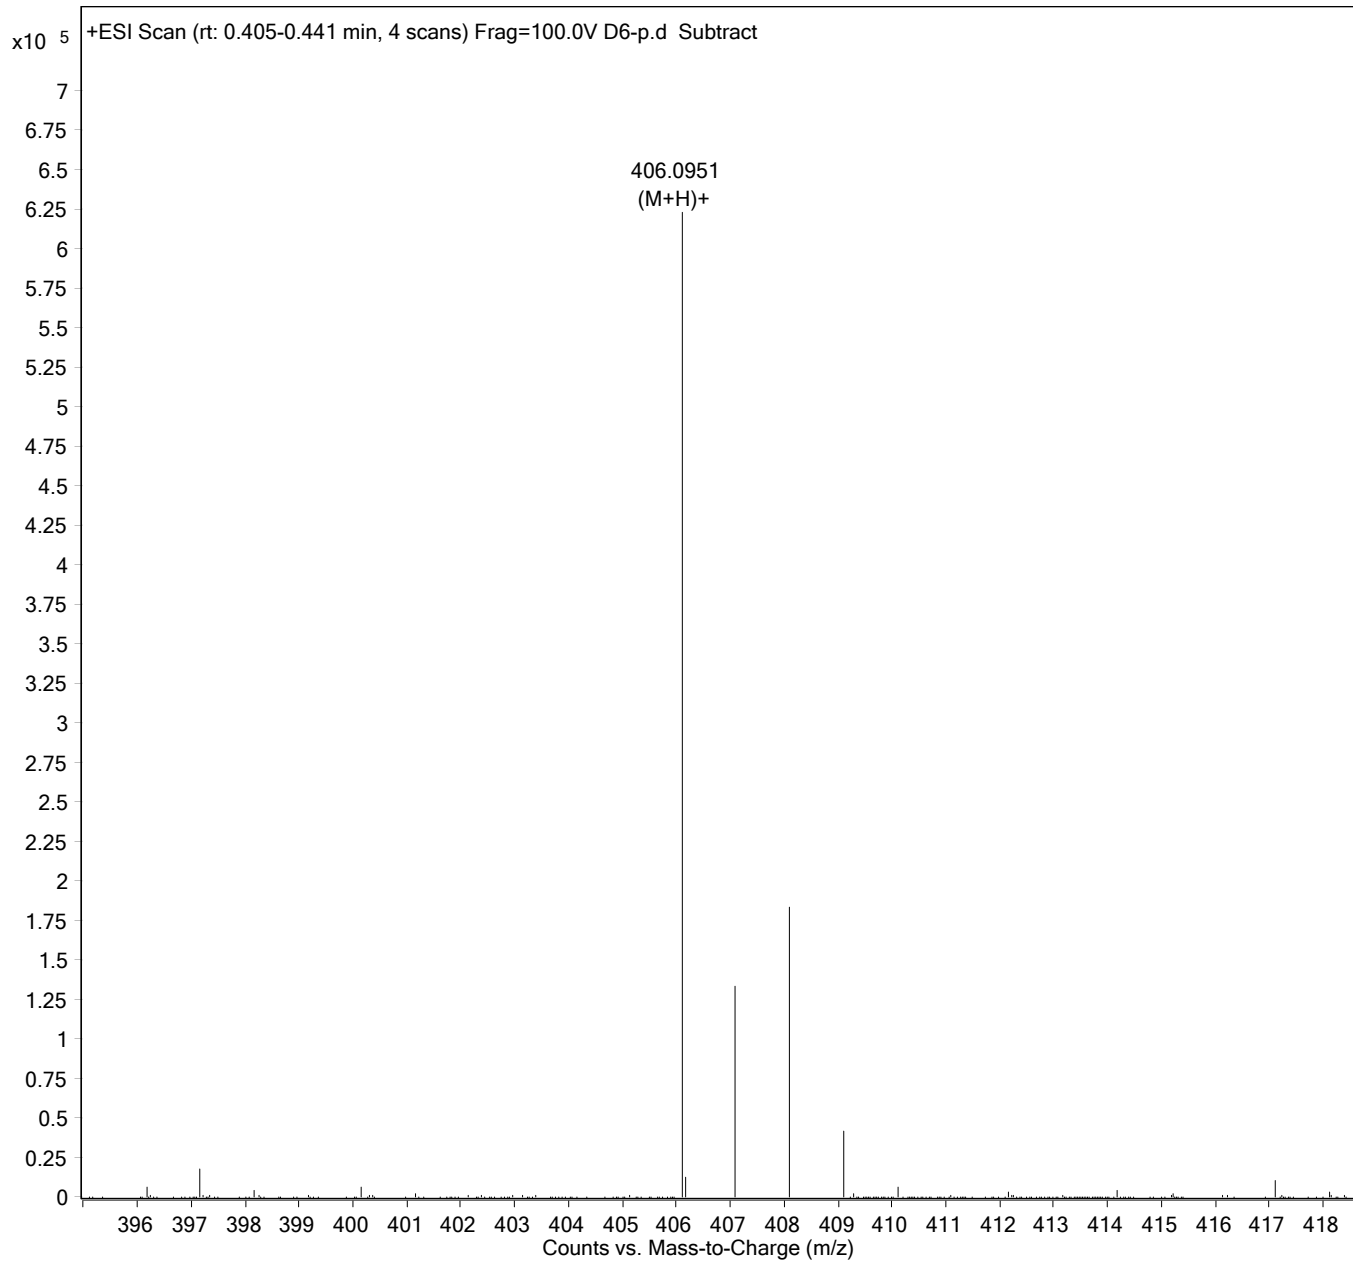

E1

SP130609-2-C C13-NMR CDCL3 303K AV-300

168.445  
165.069  
160.275  
158.594  
155.843  
152.332  
151.296  
137.225  
131.313  
128.092  
126.794  
126.189  
123.684  
122.493  
117.214  
113.604  
111.773  
110.811  
109.436

77.490  
77.068  
76.644

24.405  
15.935

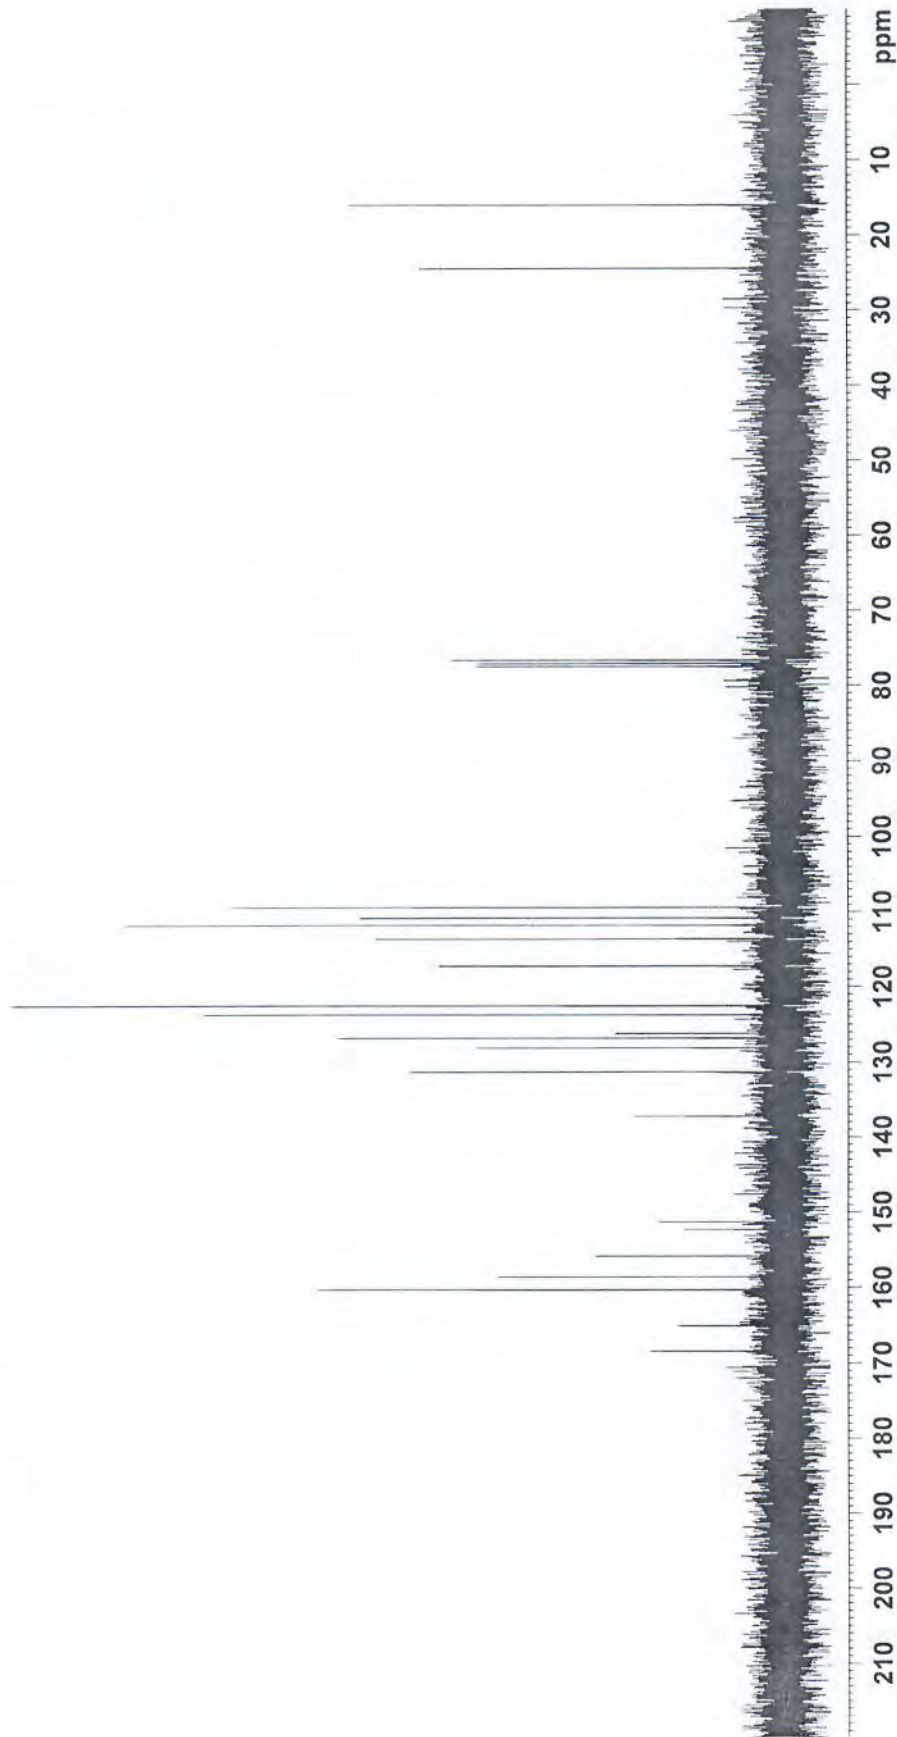

SP20130609-2 CDCL3 1HNMR AV300

121

- 8.8305
- 8.5471
- 8.5300
- 8.2248
- 7.8748
- 7.8062
- 7.6639
- 7.6382
- 7.6104
- 7.5601
- 7.5319
- 7.5229
- 7.5056
- 7.4185
- 7.3888
- 7.3815
- 7.3706
- 7.3508
- 7.3233
- 7.3172
- 7.2987
- 7.2742
- 7.2634
- 7.2491
- 7.2007
- 7.1733
- 6.9791
- 5.3478
- 5.2851
- 5.0193
- 3.6248
- 2.3640
- 2.2853
- 2.2709
- 2.1531
- 2.0735
- 1.9558
- 1.8582
- 1.6824
- 1.5912
- 1.4297
- 1.3665
- 1.2558
- 0.8782
- 0.8557
- 0.0812
- 0.0004

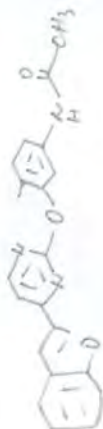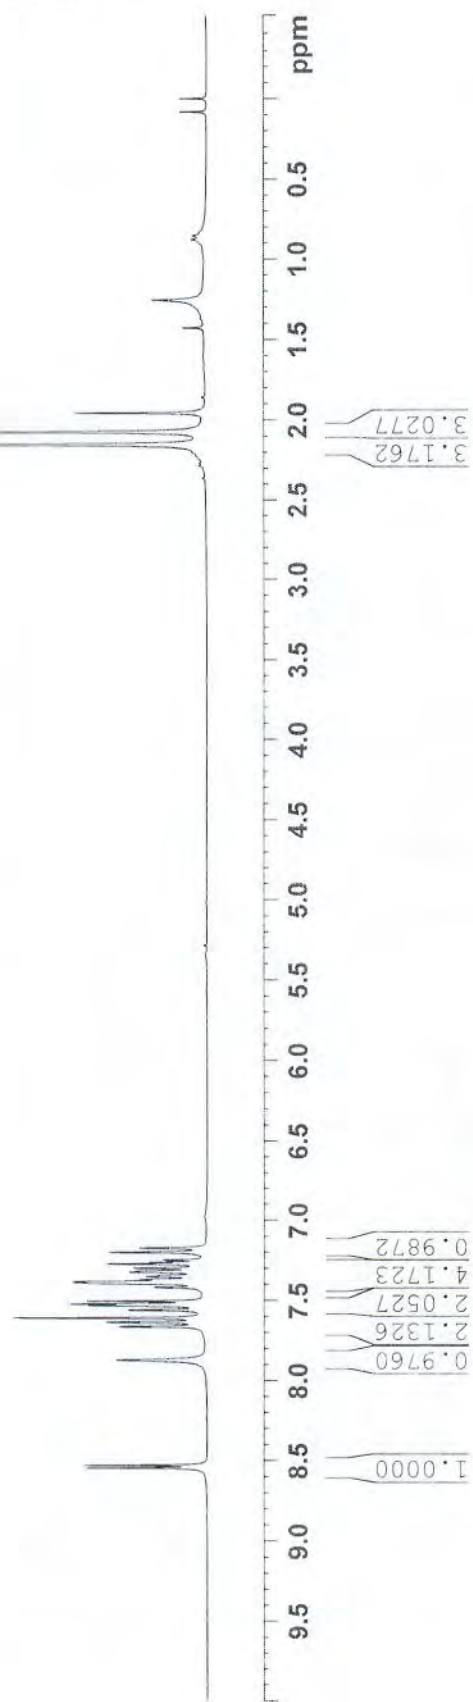

|                    |                     |                               |         |                        |                      |
|--------------------|---------------------|-------------------------------|---------|------------------------|----------------------|
| <b>Sample Name</b> |                     | <b>Position</b>               | p1B6    | <b>Instrument Name</b> | Instrument 1         |
| <b>User Name</b>   | QTOF-PC\QTOF        | <b>Inj Vol</b>                | 0.1     | <b>InjPosition</b>     |                      |
| <b>Sample Type</b> | Sample              | <b>IRM Calibration Status</b> | Success | <b>Data Filename</b>   | E1-p.d               |
| <b>ACQ Method</b>  | 20110418-MSonly-p.m | <b>Comment</b>                |         | <b>Acquired Time</b>   | 3/12/2018 4:27:24 PM |

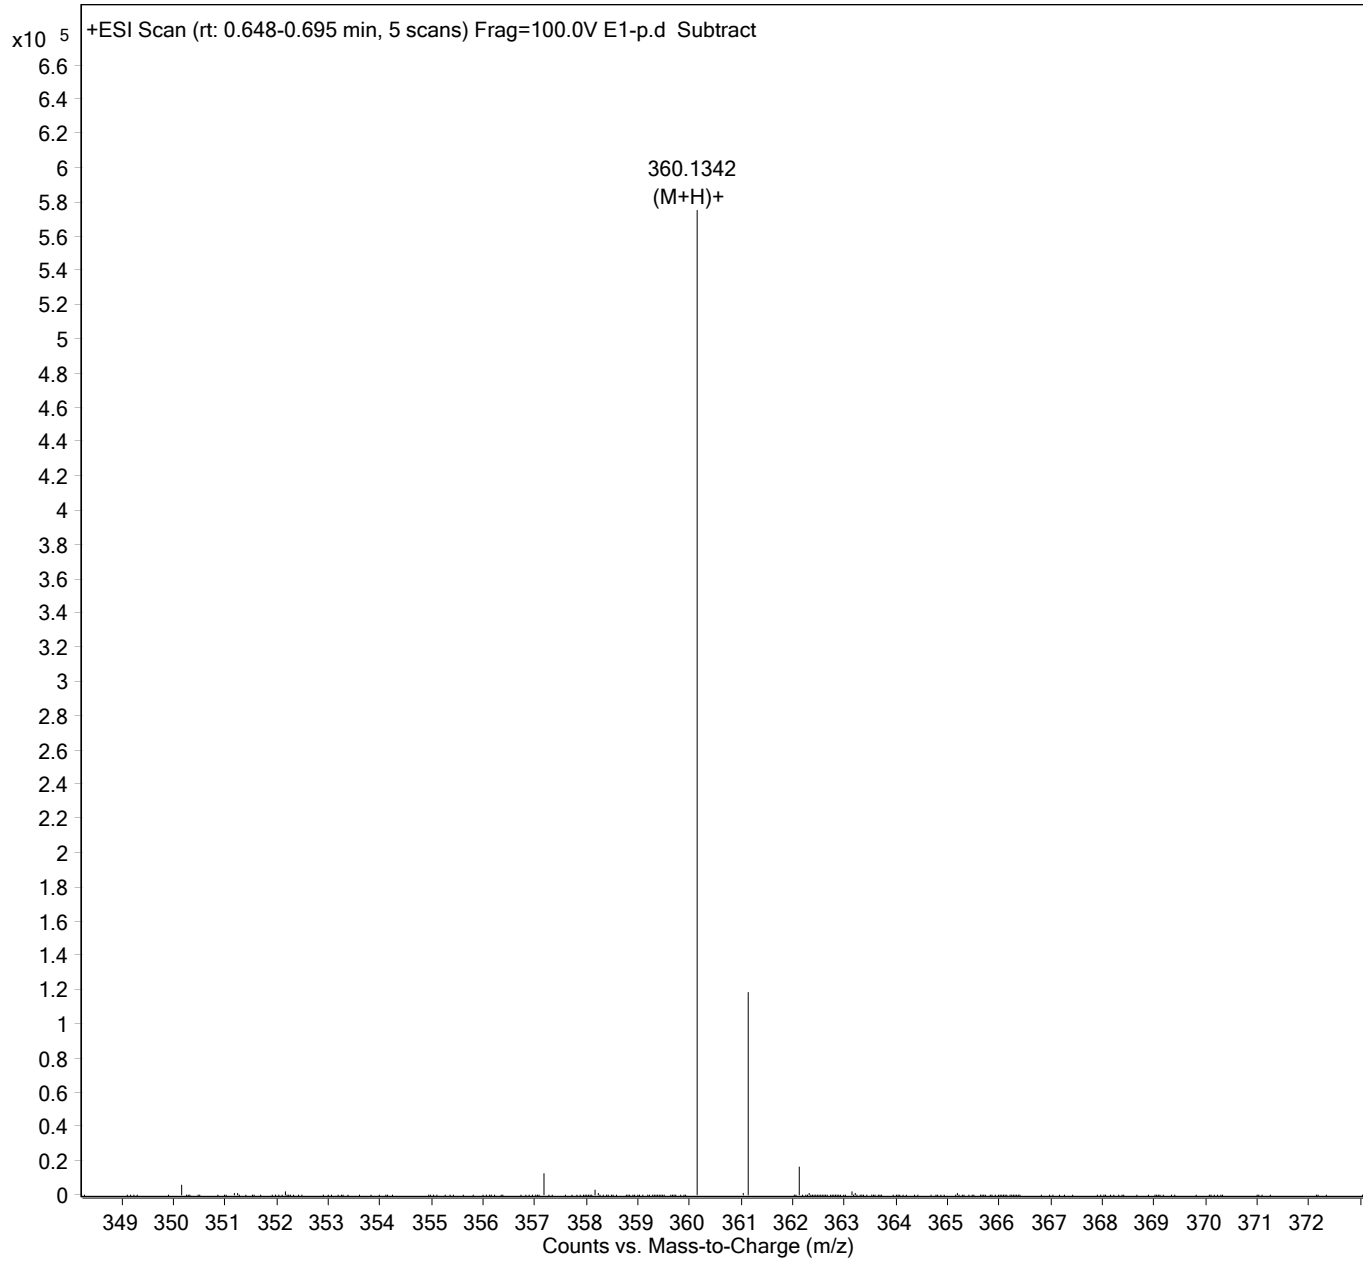

E2

SP130619-1-C C13-NMR CDCL3 303K AV-300

165.094  
160.339  
158.530  
155.839  
152.399  
151.375  
137.235  
131.267  
128.115  
126.739  
126.070  
123.654  
122.461  
117.076  
113.549  
111.752  
110.753  
109.362

77.483  
77.057  
76.635

30.548  
15.900  
9.577

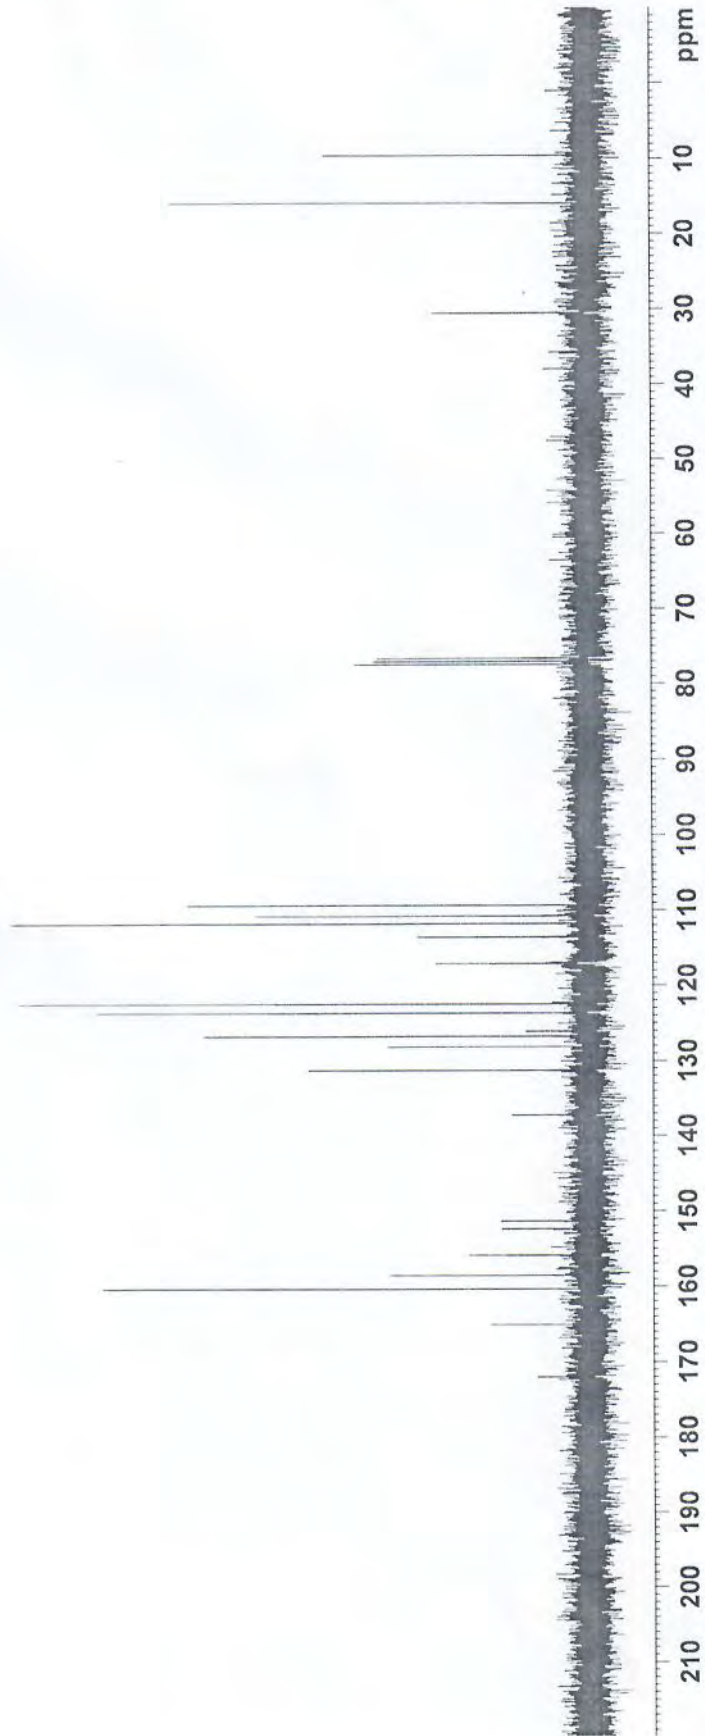

## SP20130619-1 CDCL3 1HNMR AV300

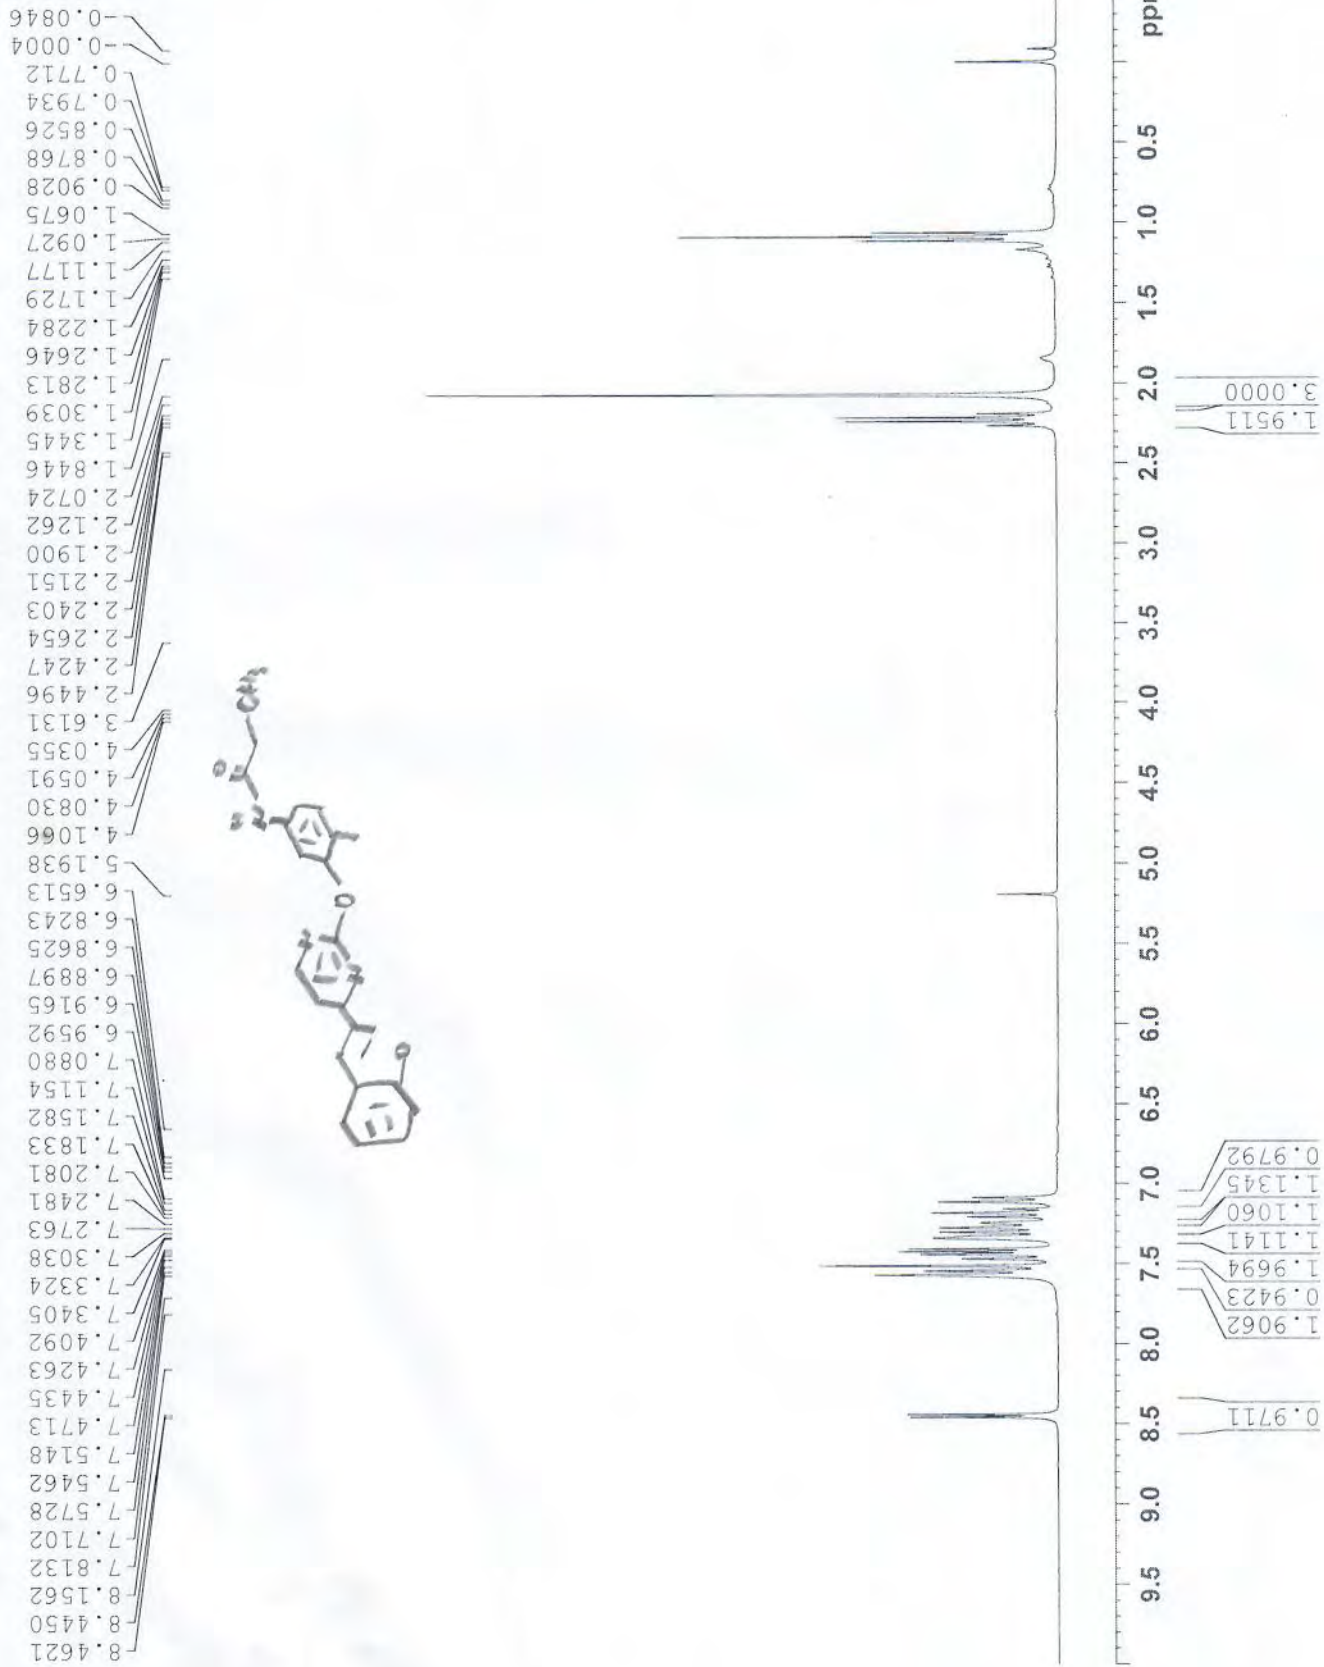

|                    |                     |                               |         |                        |                      |
|--------------------|---------------------|-------------------------------|---------|------------------------|----------------------|
| <b>Sample Name</b> |                     | <b>Position</b>               | p1B7    | <b>Instrument Name</b> | Instrument 1         |
| <b>User Name</b>   | QTOF-PC\QTOF        | <b>Inj Vol</b>                | 0.1     | <b>InjPosition</b>     |                      |
| <b>Sample Type</b> | Sample              | <b>IRM Calibration Status</b> | Success | <b>Data Filename</b>   | E2-p.d               |
| <b>ACQ Method</b>  | 20110418-MSonly-p.m | <b>Comment</b>                |         | <b>Acquired Time</b>   | 3/12/2018 4:29:34 PM |

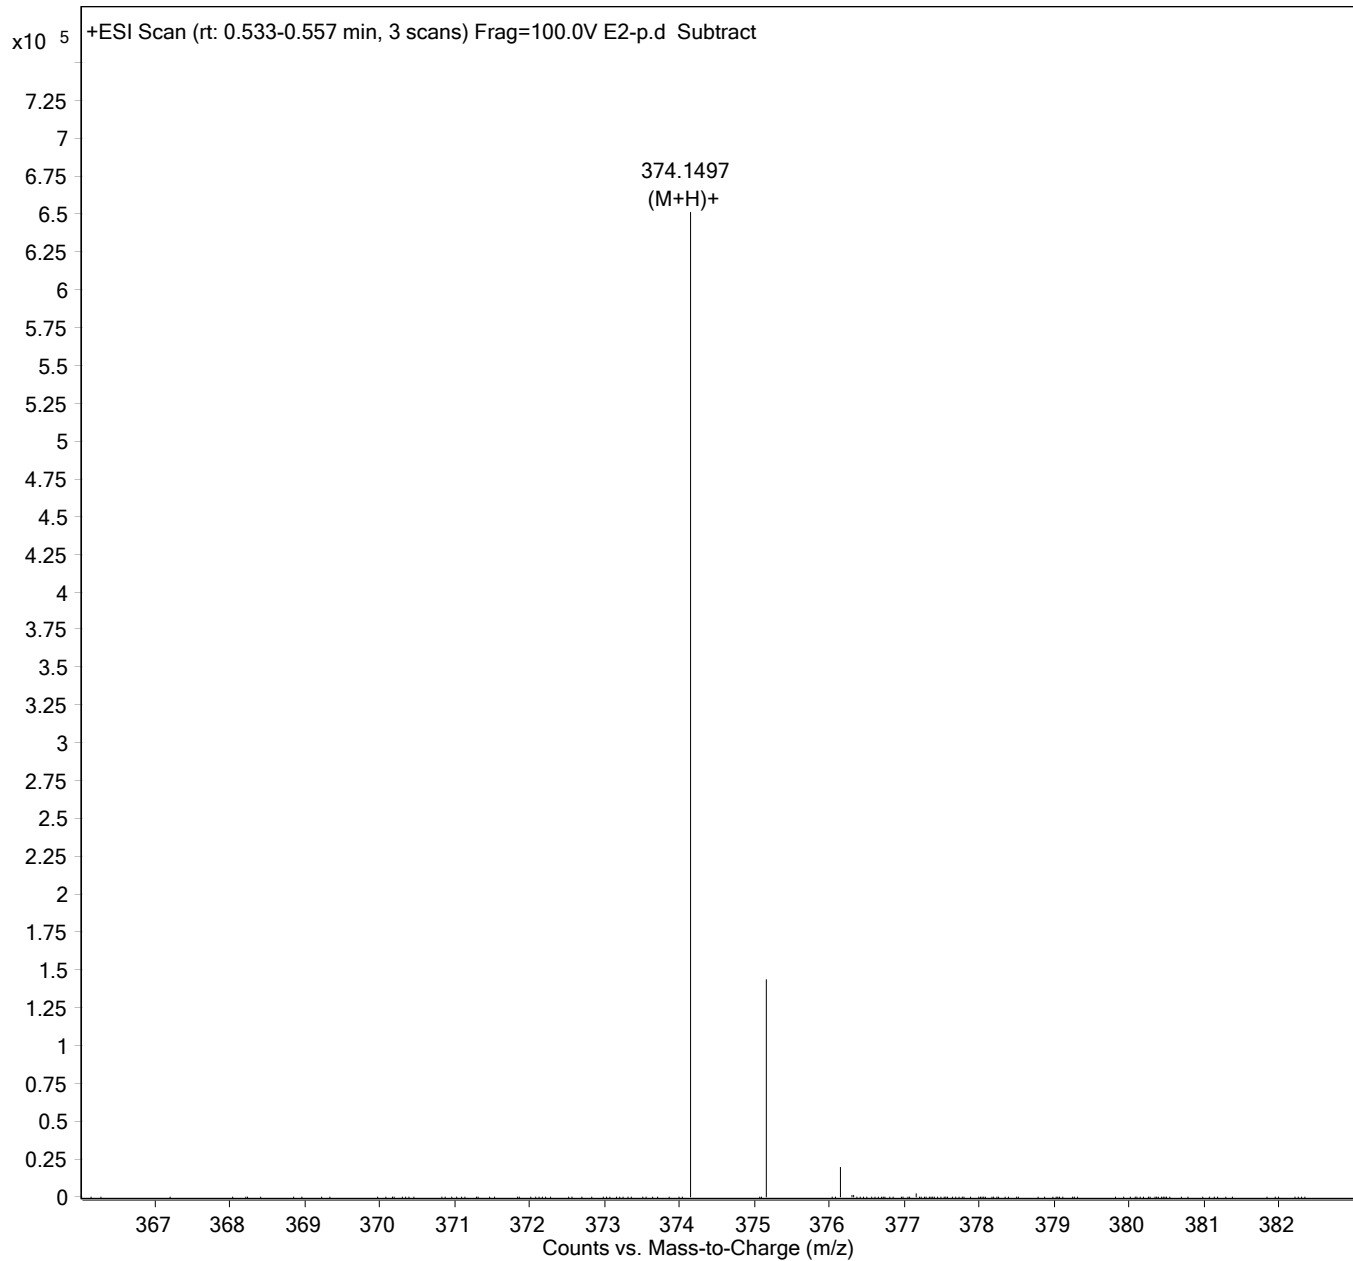



E3

SP130621-2-C C13-NMR CDCL3 303K AV-300

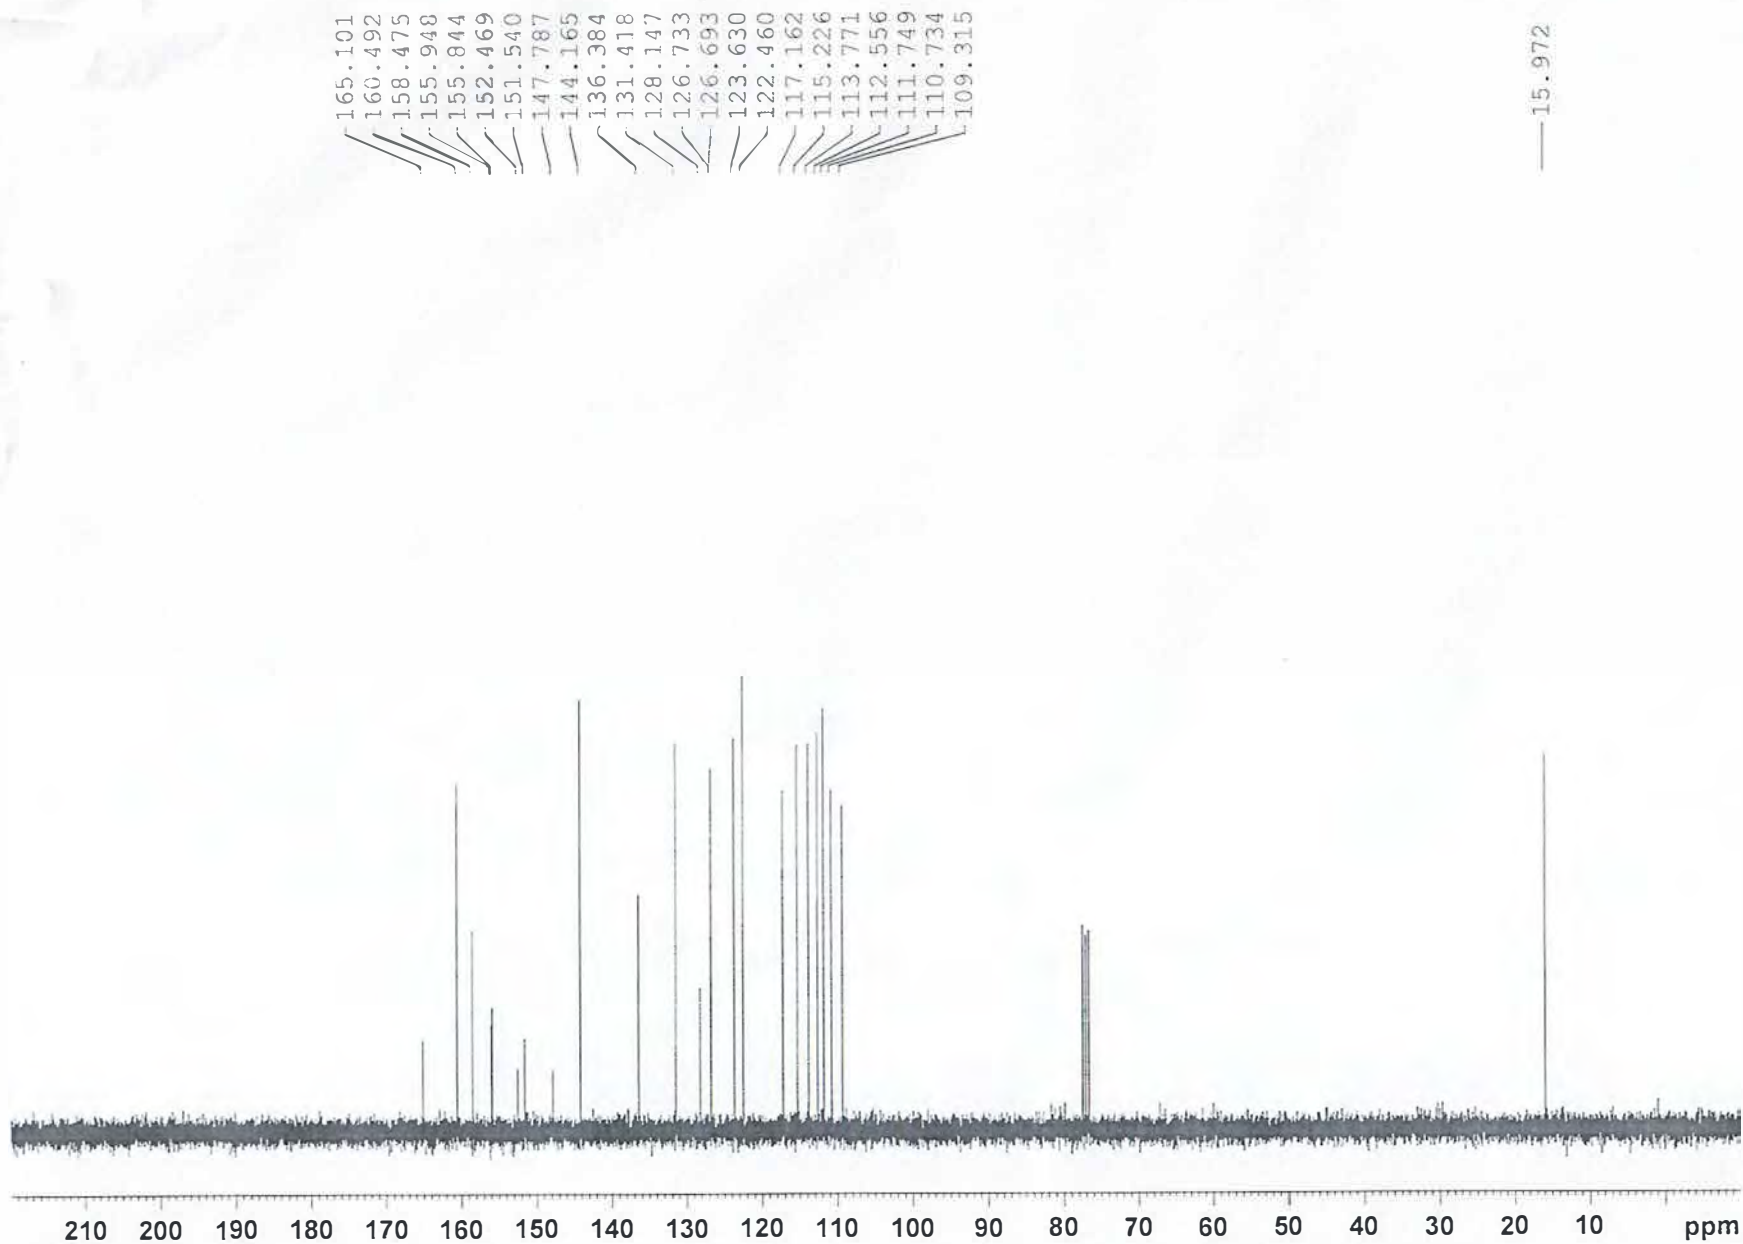

E3

SP20130621-2 CDCL3 1HNMR AV300

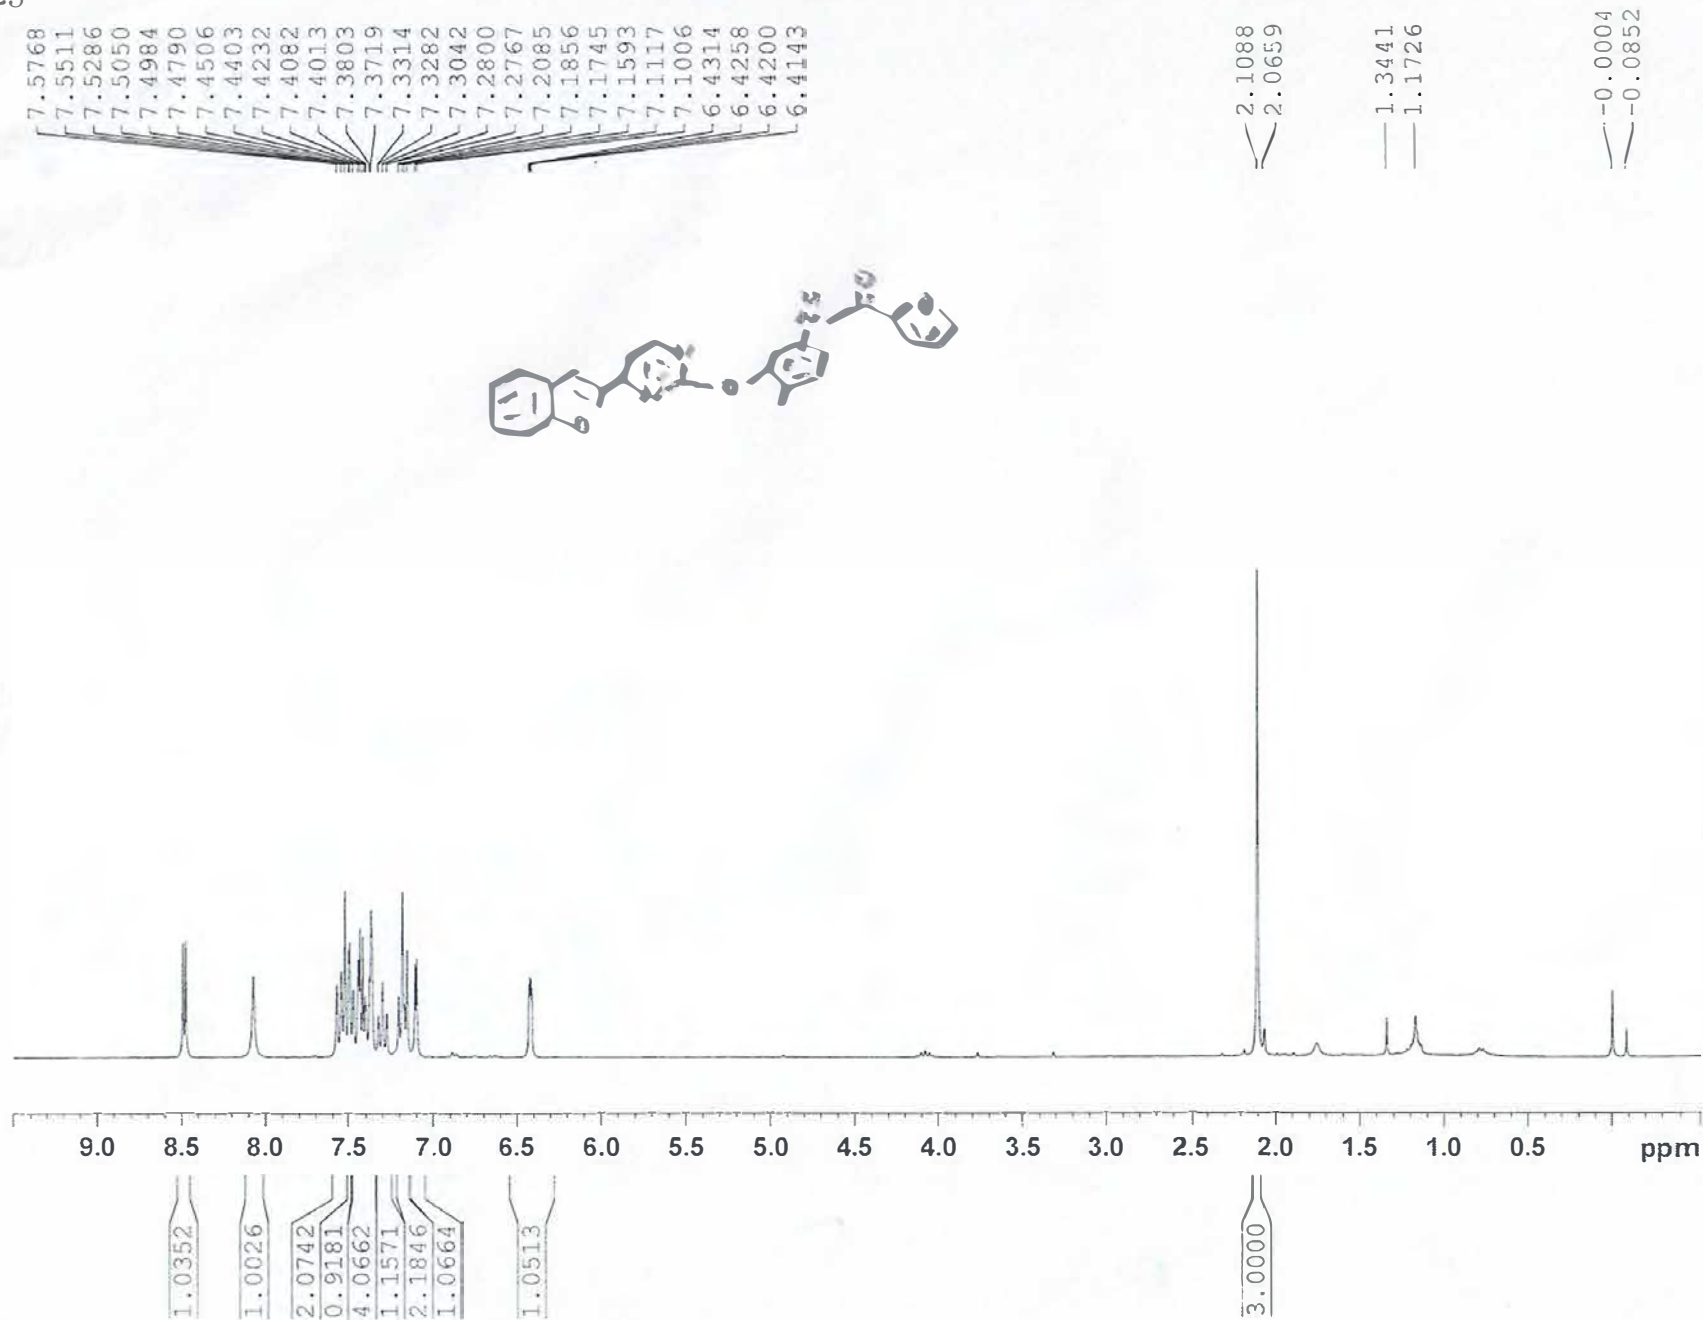

|                    |                     |                               |         |                        |                      |
|--------------------|---------------------|-------------------------------|---------|------------------------|----------------------|
| <b>Sample Name</b> |                     | <b>Position</b>               | p1B9    | <b>Instrument Name</b> | Instrument 1         |
| <b>User Name</b>   | QTOF-PC\QTOF        | <b>Inj Vol</b>                | 0.1     | <b>InjPosition</b>     |                      |
| <b>Sample Type</b> | Sample              | <b>IRM Calibration Status</b> | Success | <b>Data Filename</b>   | E3-p.d               |
| <b>ACQ Method</b>  | 20110418-MSonly-p.m | <b>Comment</b>                |         | <b>Acquired Time</b>   | 3/12/2018 4:33:55 PM |

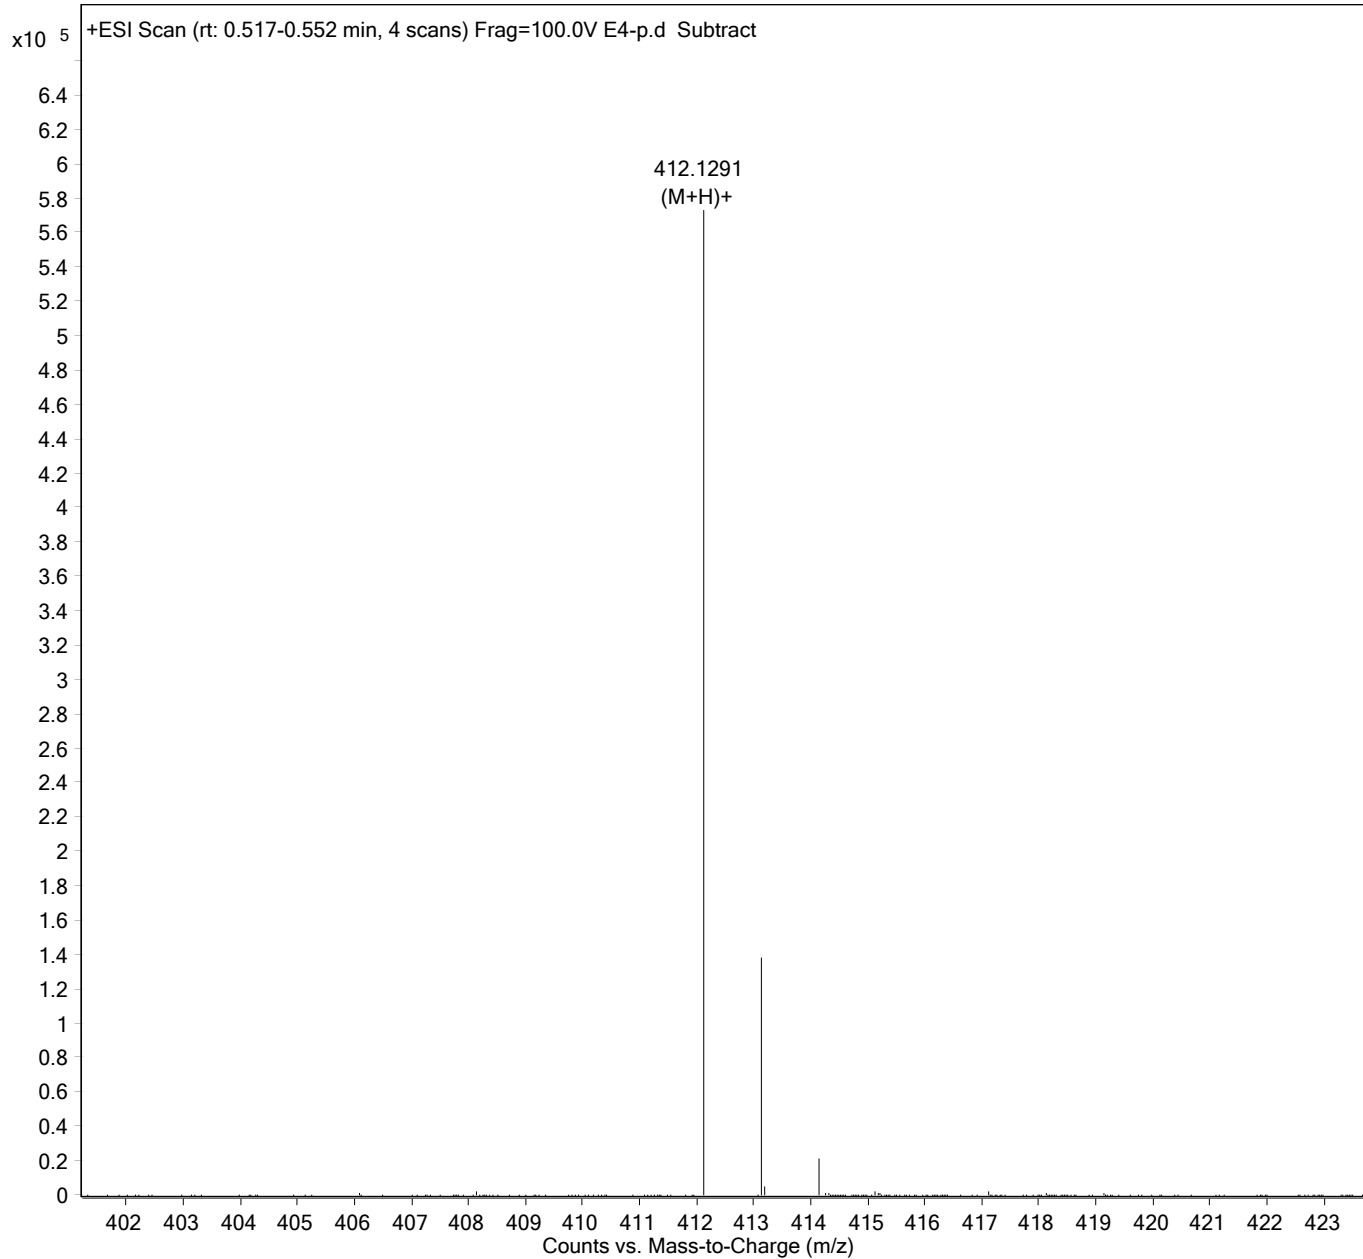

SP130624-C C13-NMR cdcl3 303K AV-300

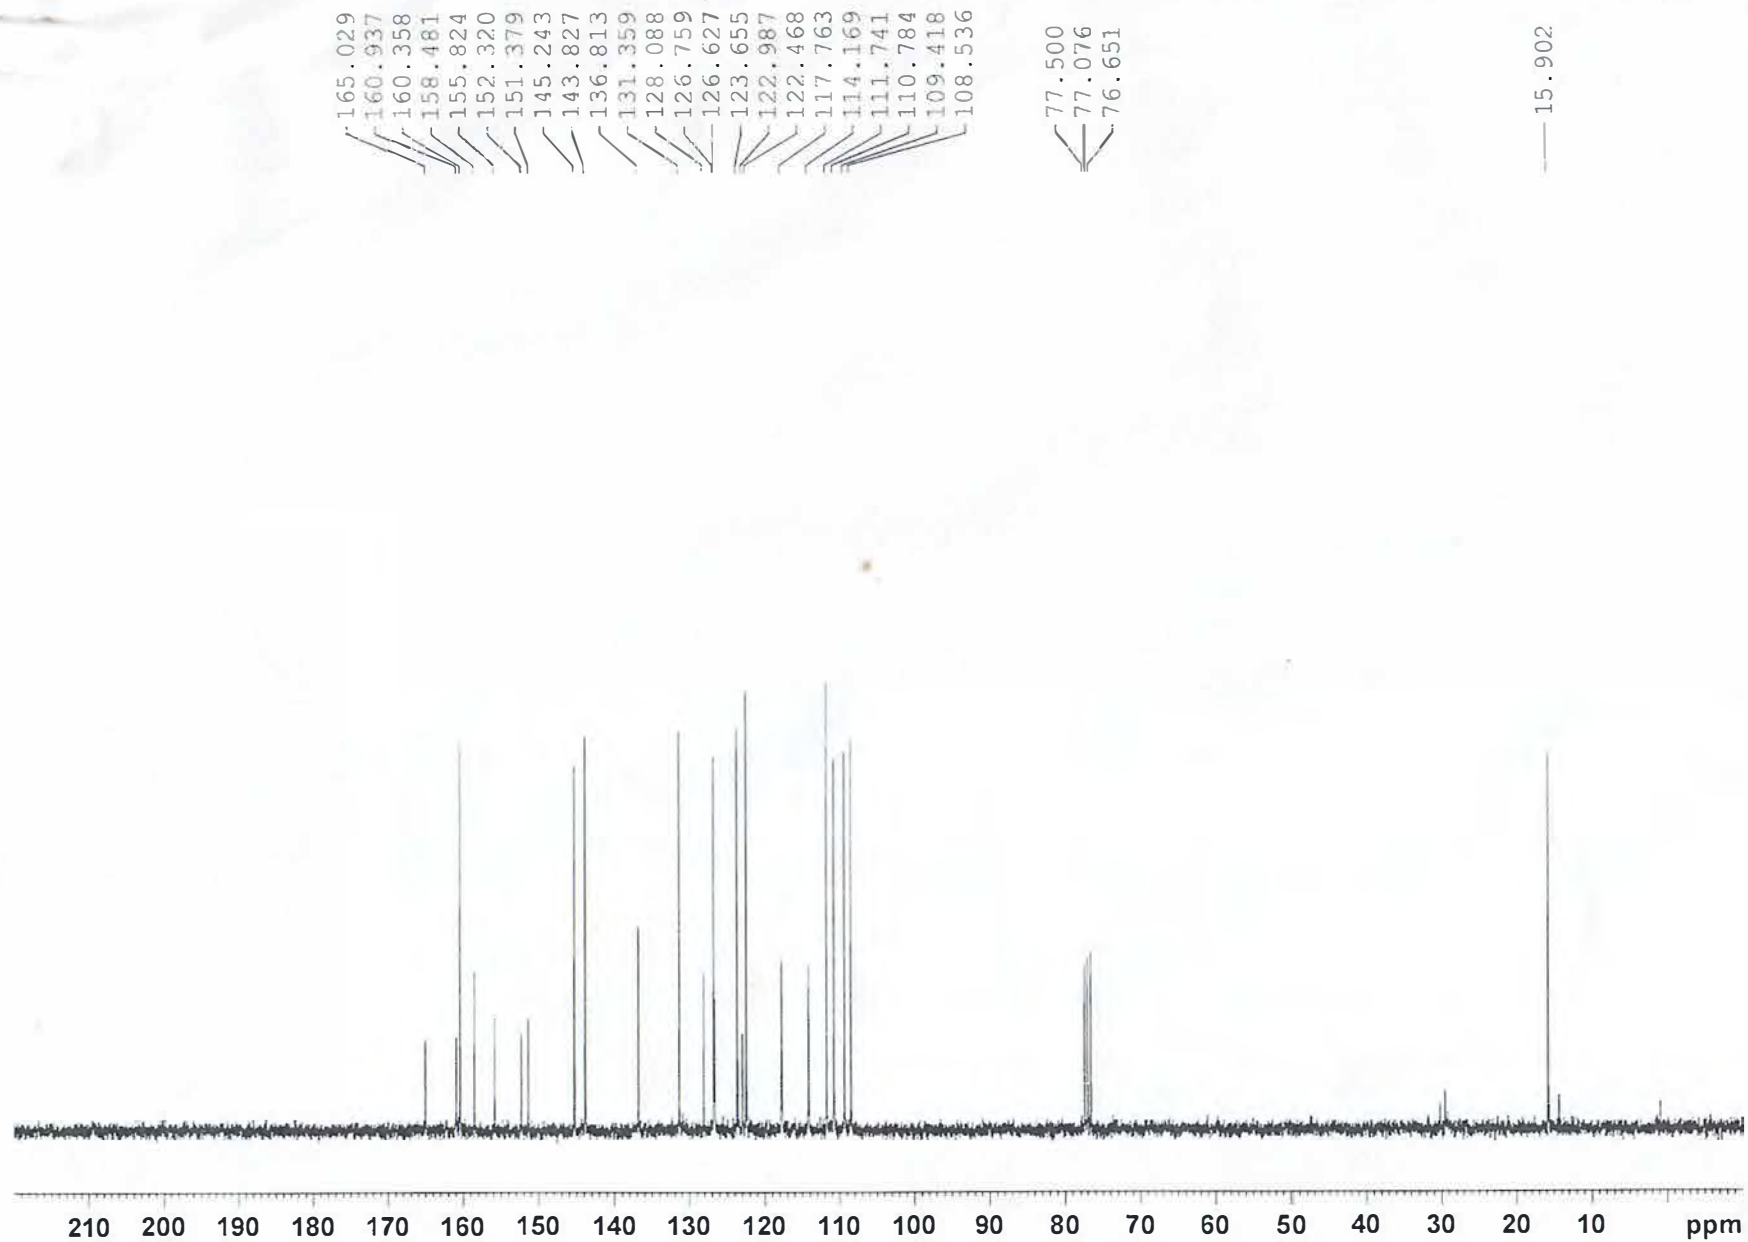

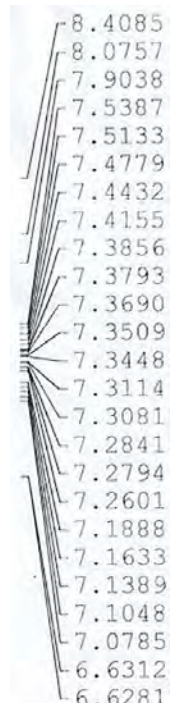

2.0533

0.1947  
-0.0003  
-0.0292  
-0.0902  
-0.1996

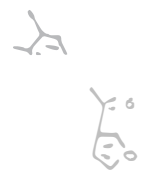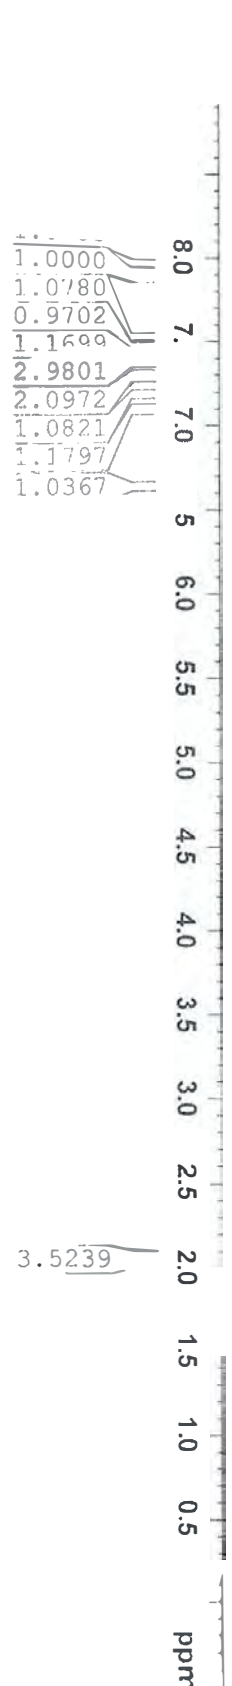

|                    |                    |                               |         |                        |                      |
|--------------------|--------------------|-------------------------------|---------|------------------------|----------------------|
| <b>Sample Name</b> |                    | <b>Position</b>               | P1C1    | <b>Instrument Name</b> | Instrument 1         |
| <b>User Name</b>   | QTOF-PC\QTOF       | <b>Inj Vol</b>                | 0.1     | <b>InjPosition</b>     |                      |
| <b>Sample Type</b> | Sample             | <b>IRM Calibration Status</b> | Success | <b>Data Filename</b>   | E4-p.d               |
| <b>ACQ Method</b>  | 20110418-MOnly-p.m | <b>Comment</b>                |         | <b>Acquired Time</b>   | 3/12/2018 4:36:07 PM |

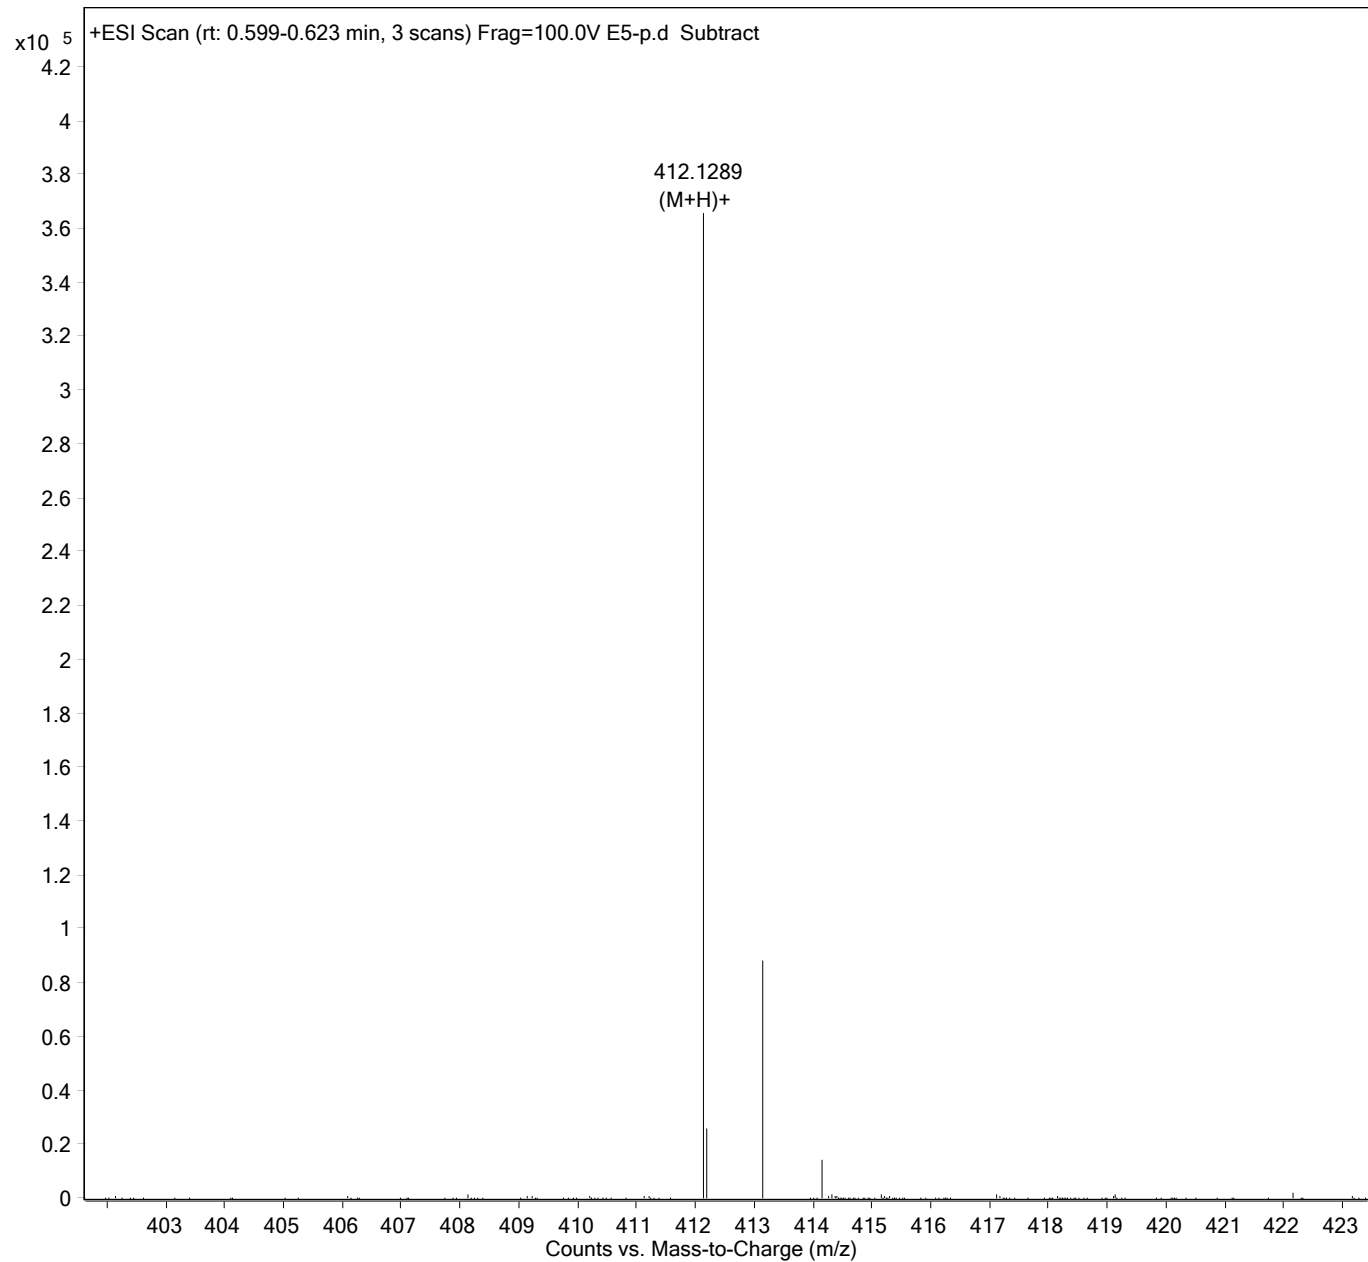

E5

SP131021-C C13-NMR CDCL3 303K AV-300

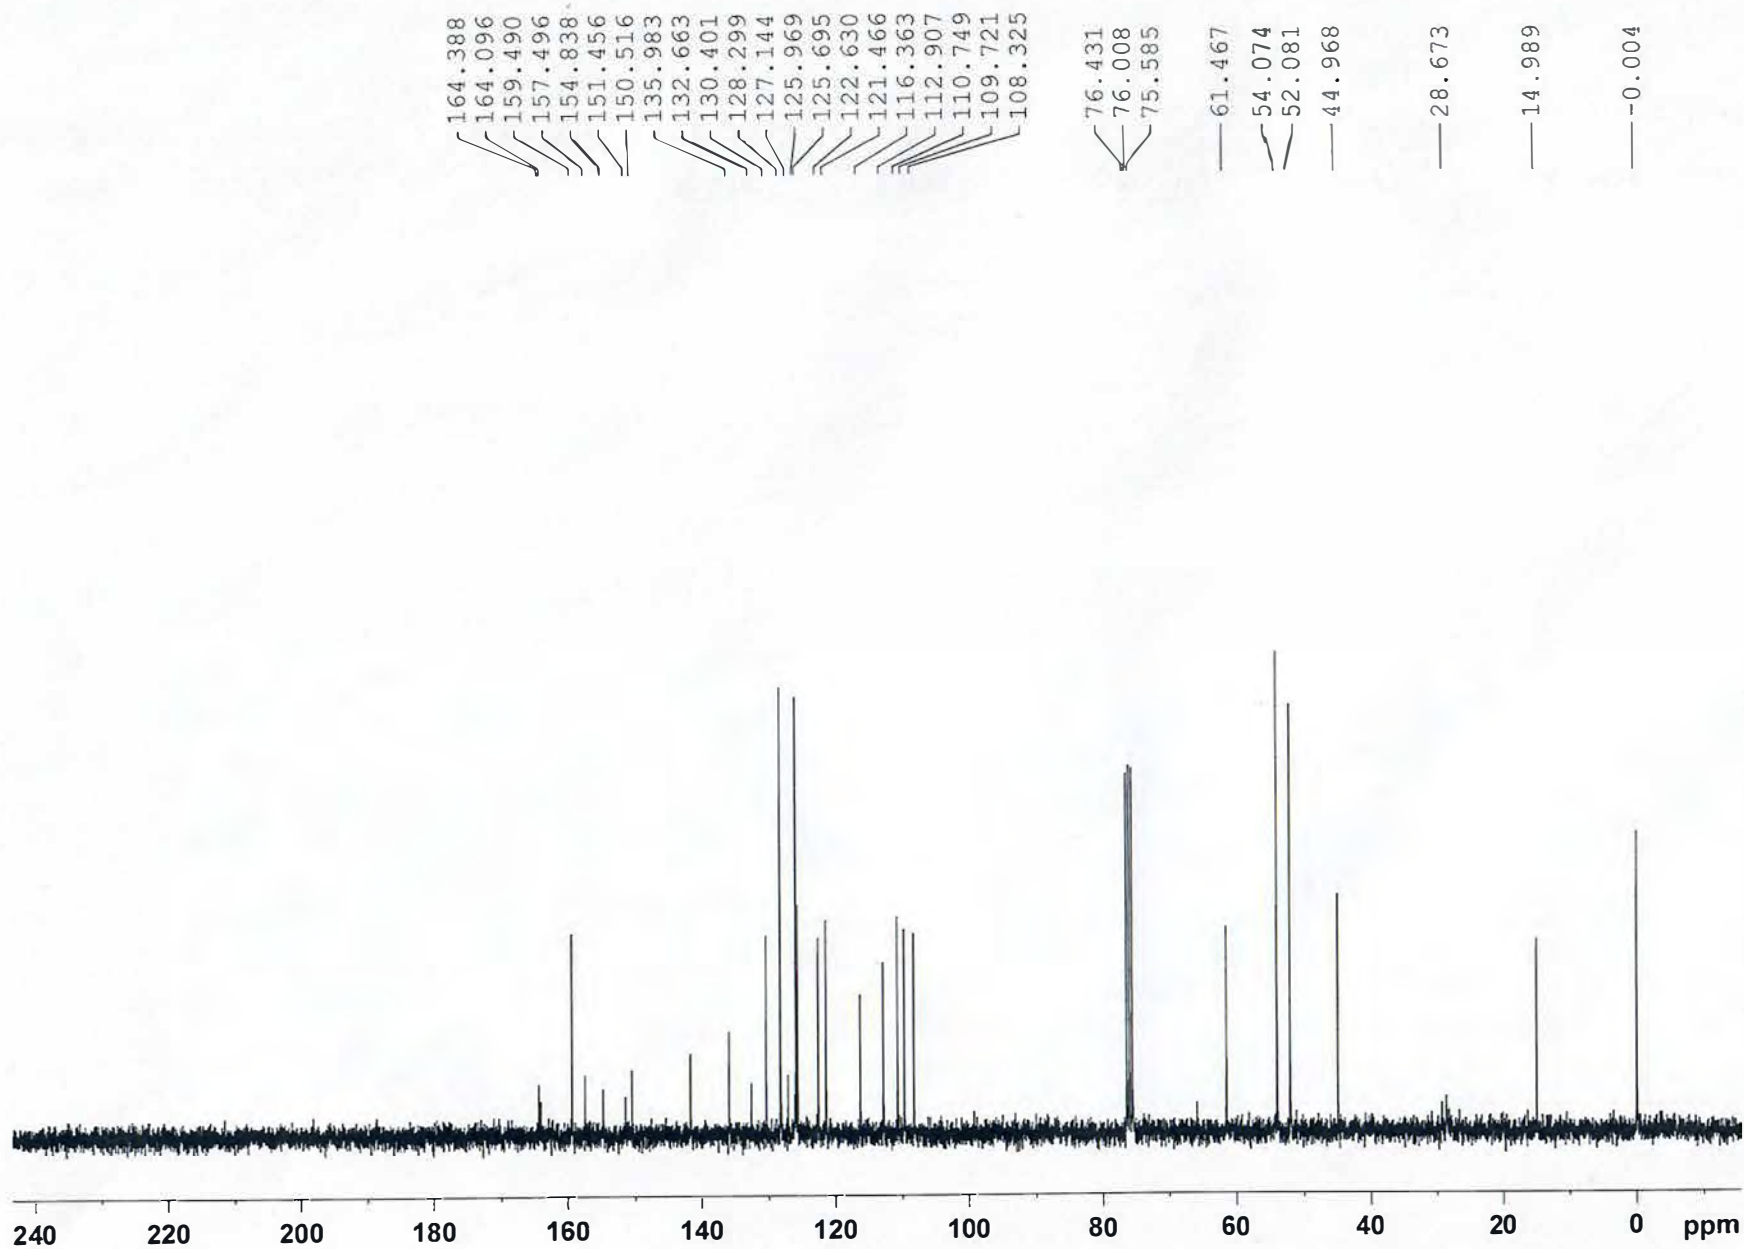

E5

SP20131021 CDCL3 1HNMR AV300

8.5664  
7.9139  
7.8022  
7.7752  
7.6785  
7.6527  
7.6335  
7.5680  
7.5614  
7.5475  
7.5381  
7.5209  
7.5019  
7.4744  
7.4683  
7.4313  
7.4044  
7.3786  
7.3535  
7.3077  
7.2908  
7.2844  
7.2621

— 3.5409

— 2.4643  
— 2.2851  
— 2.2004

— 1.4293  
— 1.2543

— 0.0718  
— -0.0019

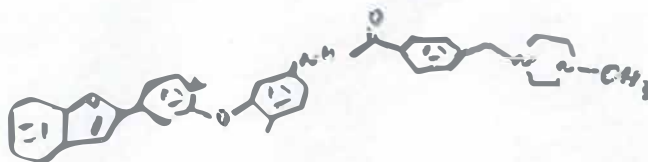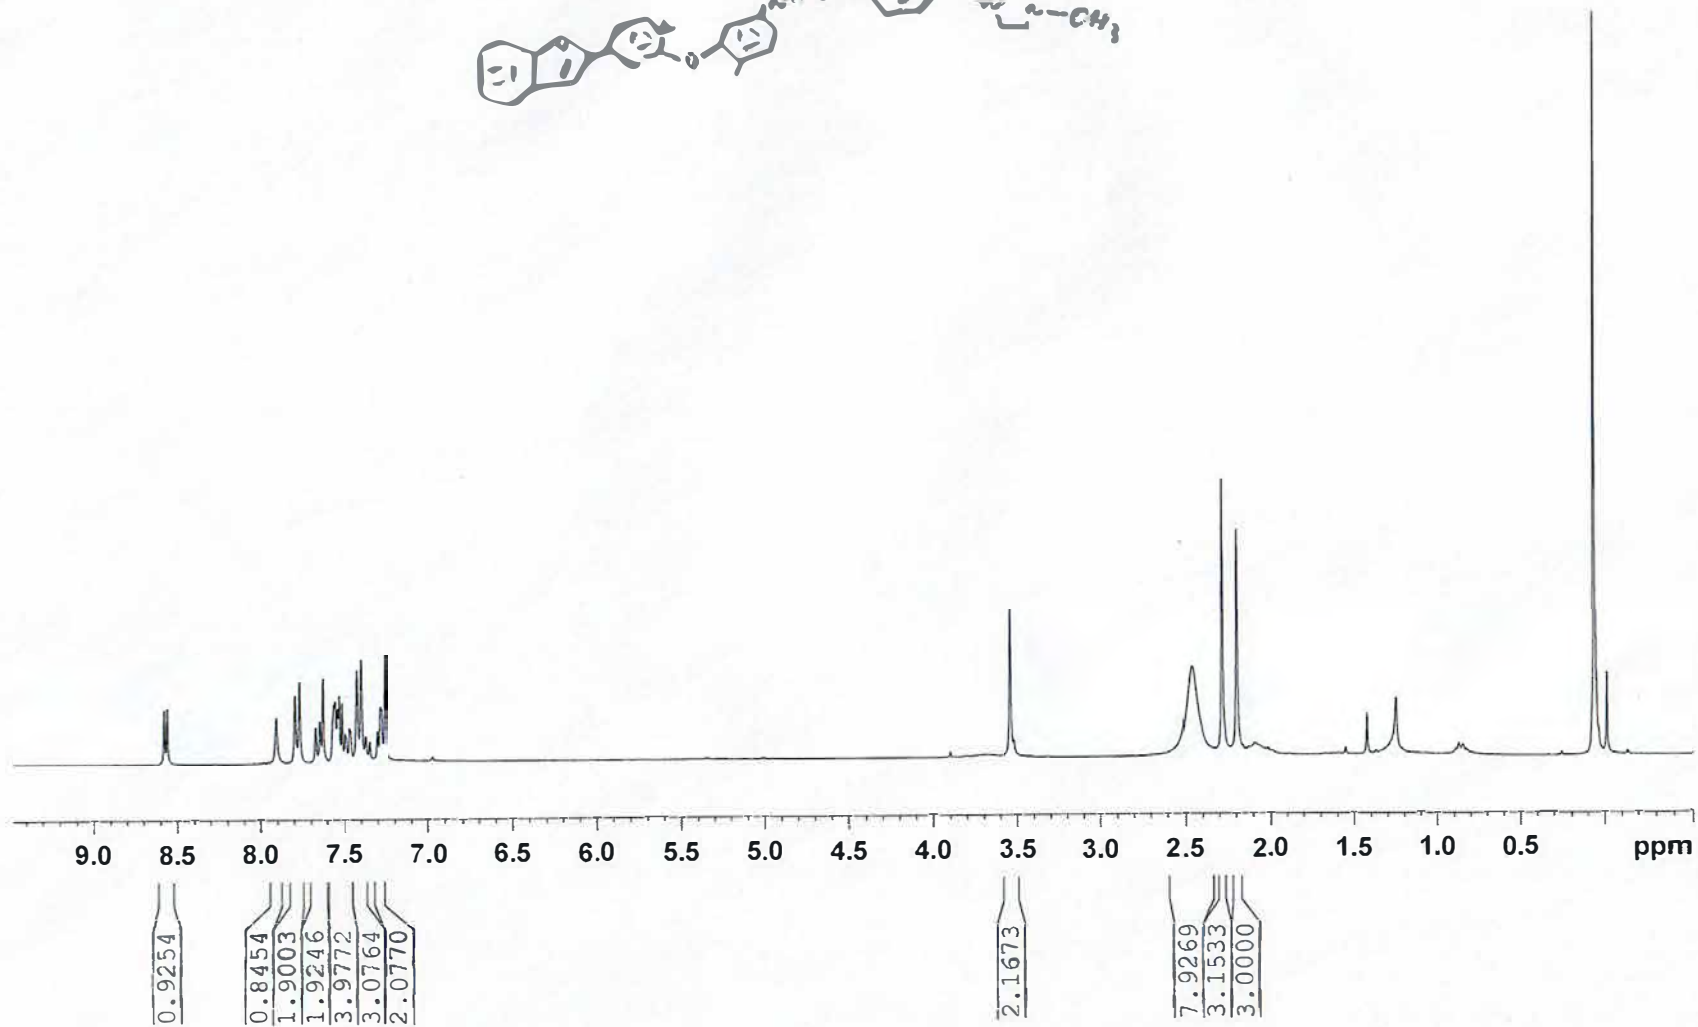



|                    |                     |                               |         |                        |                      |
|--------------------|---------------------|-------------------------------|---------|------------------------|----------------------|
| <b>Sample Name</b> |                     | <b>Position</b>               | P2a5    | <b>Instrument Name</b> | Instrument 1         |
| <b>User Name</b>   | QTOF-PC\QTOF        | <b>Inj Vol</b>                | 0.1     | <b>InjPosition</b>     |                      |
| <b>Sample Type</b> | Sample              | <b>IRM Calibration Status</b> | Success | <b>Data Filename</b>   | E5-p.d               |
| <b>ACQ Method</b>  | 20110418-MSonly-p.m | <b>Comment</b>                |         | <b>Acquired Time</b>   | 3/13/2018 1:50:42 PM |

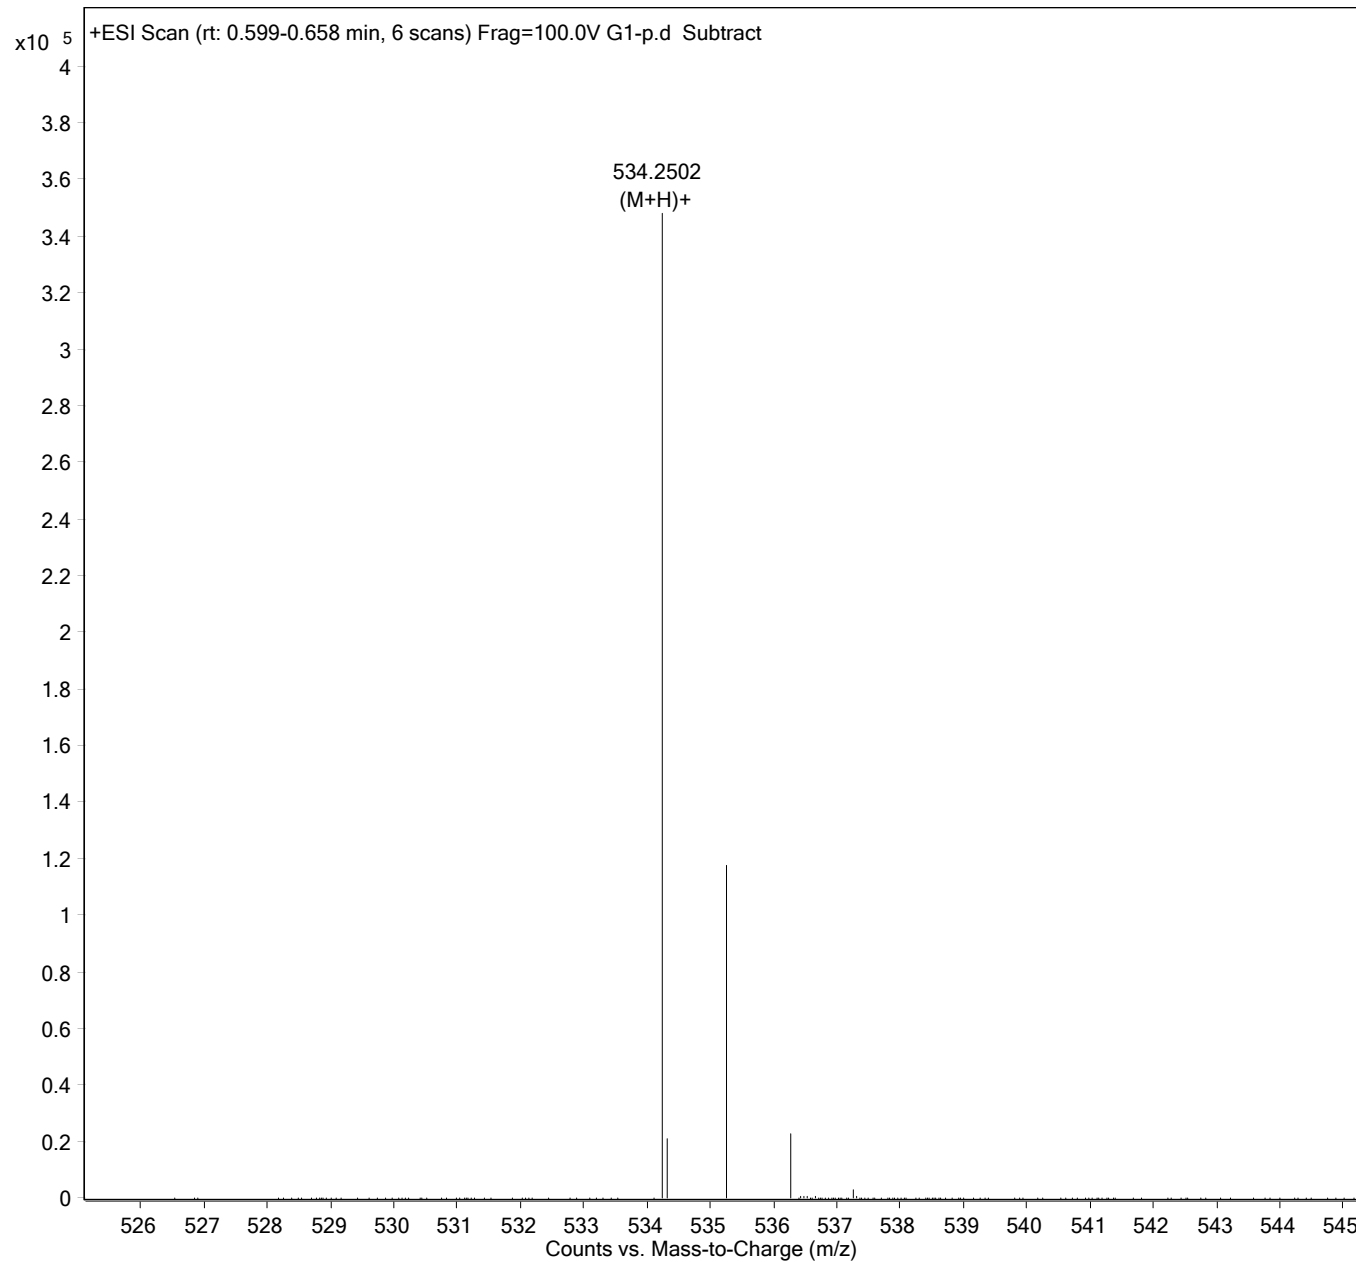

E6

SP20131220-2-C C13-NMR CDCL3 303K AV-300

167.566  
165.024  
160.471  
158.501  
155.829  
152.384  
151.453  
136.482  
131.394  
128.091  
126.772  
126.674  
125.642  
124.372  
123.684  
122.465  
118.669  
116.940  
113.352  
111.773  
110.754  
110.422  
109.327

77.503  
77.078  
76.655

61.463  
54.311  
51.761  
44.733

15.979

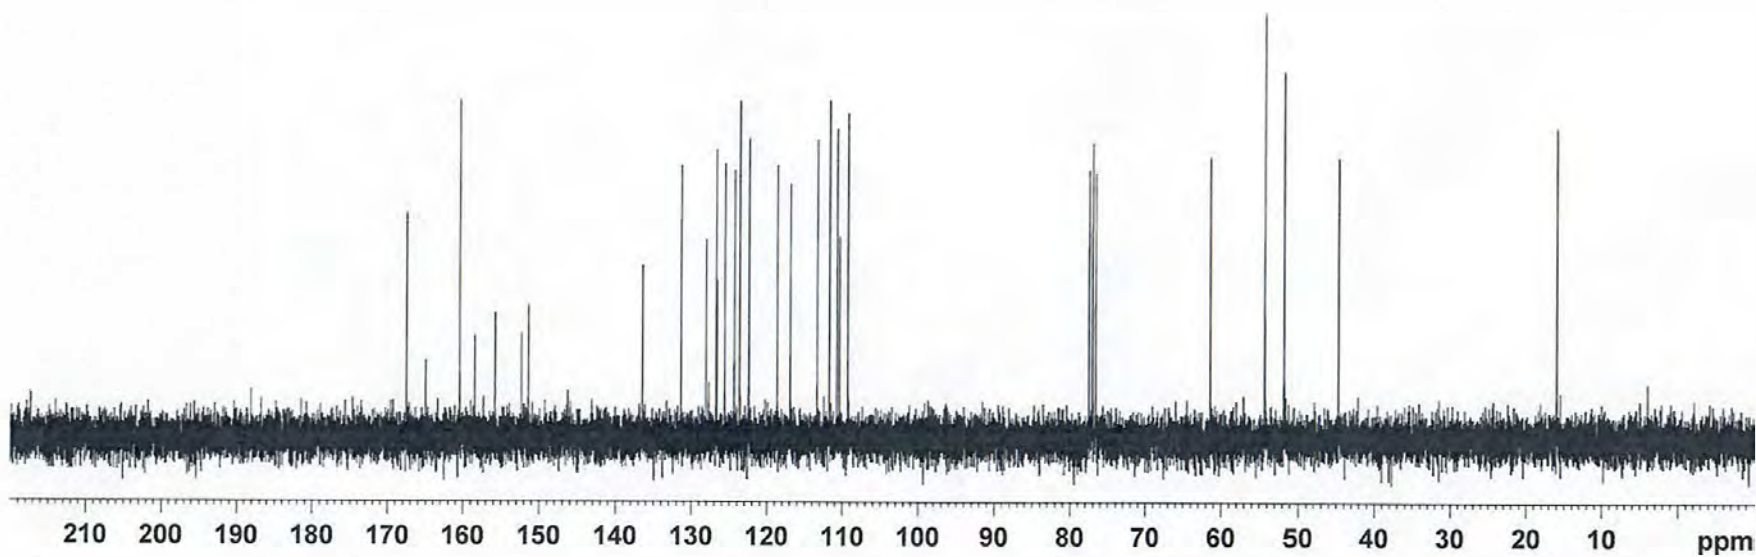

E6

SP130930-2 CDCL3 1HNMR AV300

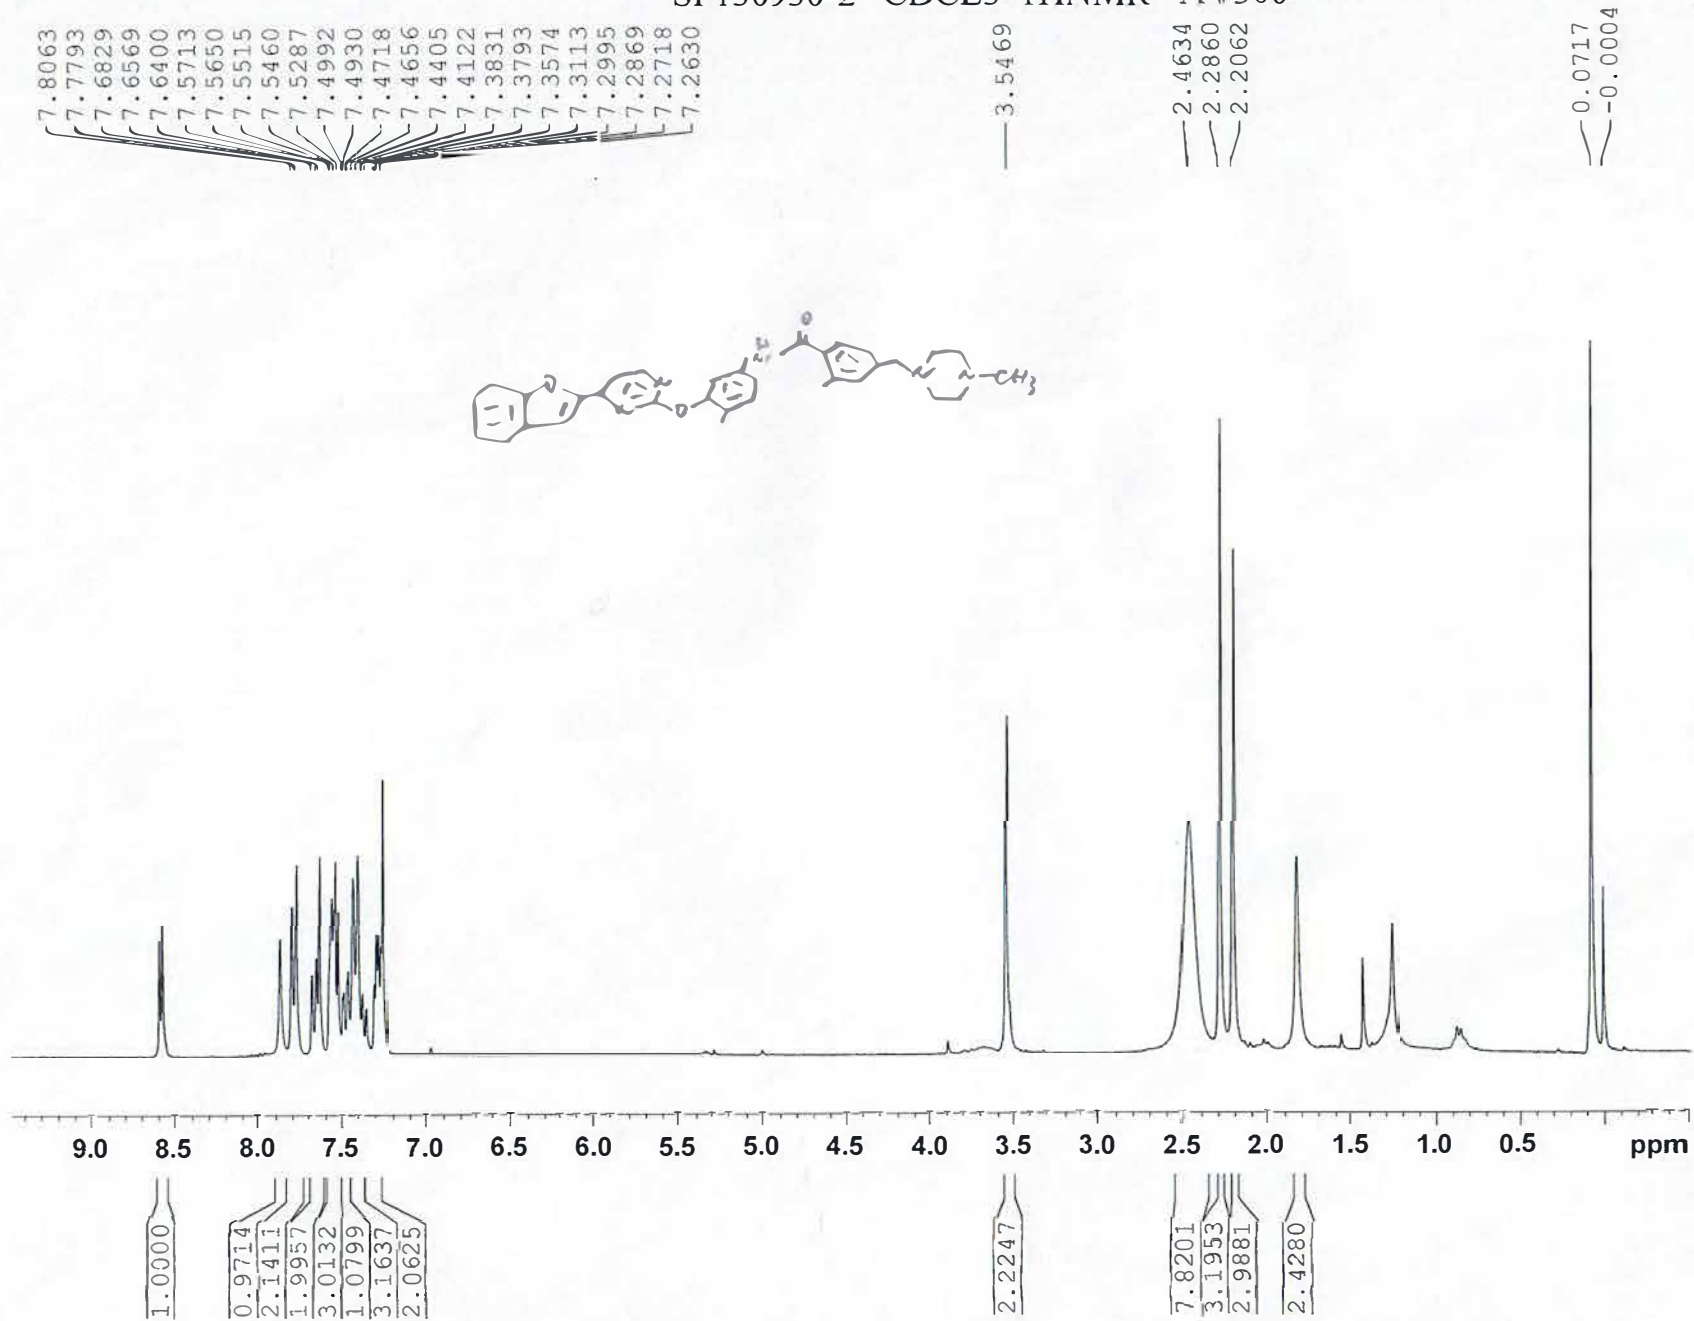

E7

SP-20131011 CDCL3 1HNMR AV300

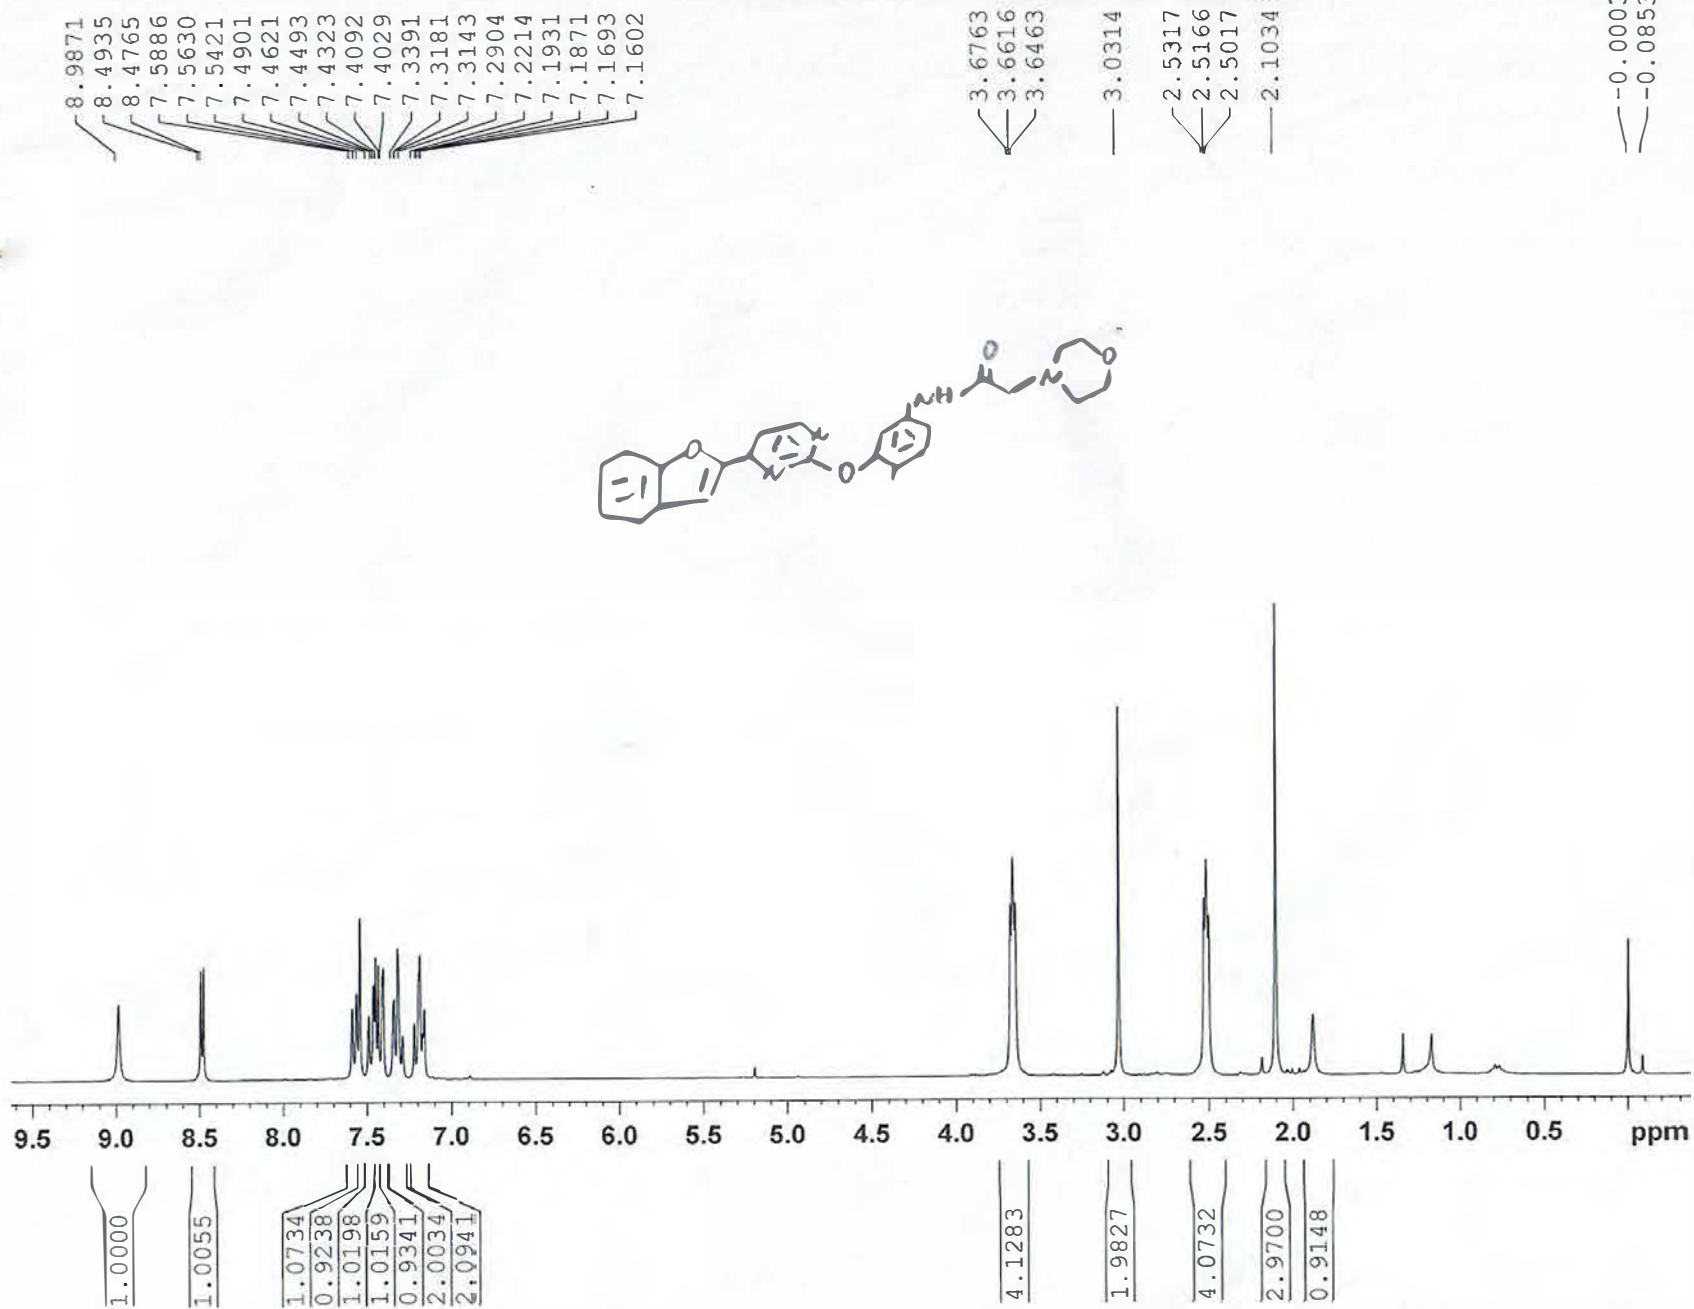

E7

SP20131018-C C13-NMR cdcl3 303K AV-300

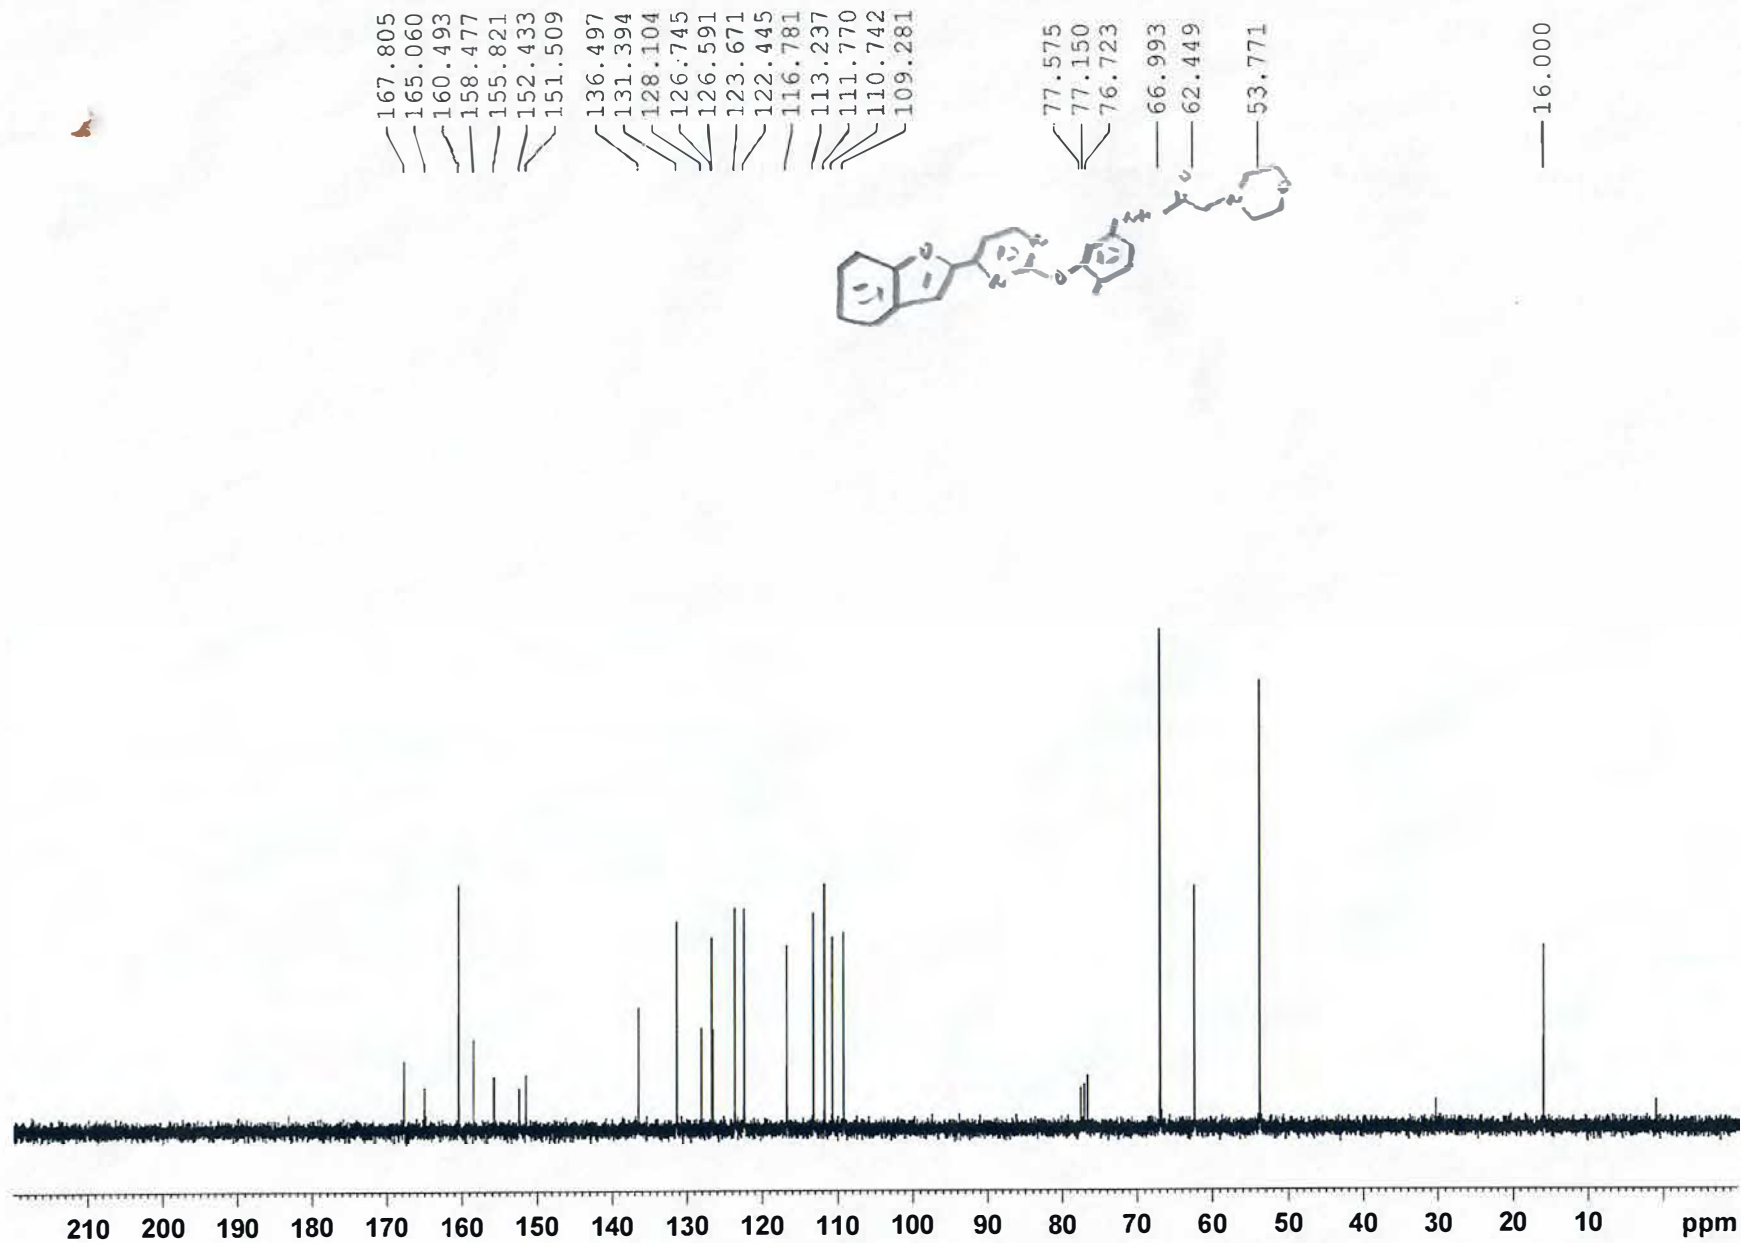

|                    |                     |                               |         |                        |                      |
|--------------------|---------------------|-------------------------------|---------|------------------------|----------------------|
| <b>Sample Name</b> |                     | <b>Position</b>               | P2a6    | <b>Instrument Name</b> | Instrument 1         |
| <b>User Name</b>   | QTOF-PC\QTOF        | <b>Inj Vol</b>                | 0.1     | <b>InjPosition</b>     |                      |
| <b>Sample Type</b> | Sample              | <b>IRM Calibration Status</b> | Success | <b>Data Filename</b>   | E7-p.d               |
| <b>ACQ Method</b>  | 20110418-MSonly-p.m | <b>Comment</b>                |         | <b>Acquired Time</b>   | 3/13/2018 1:53:04 PM |

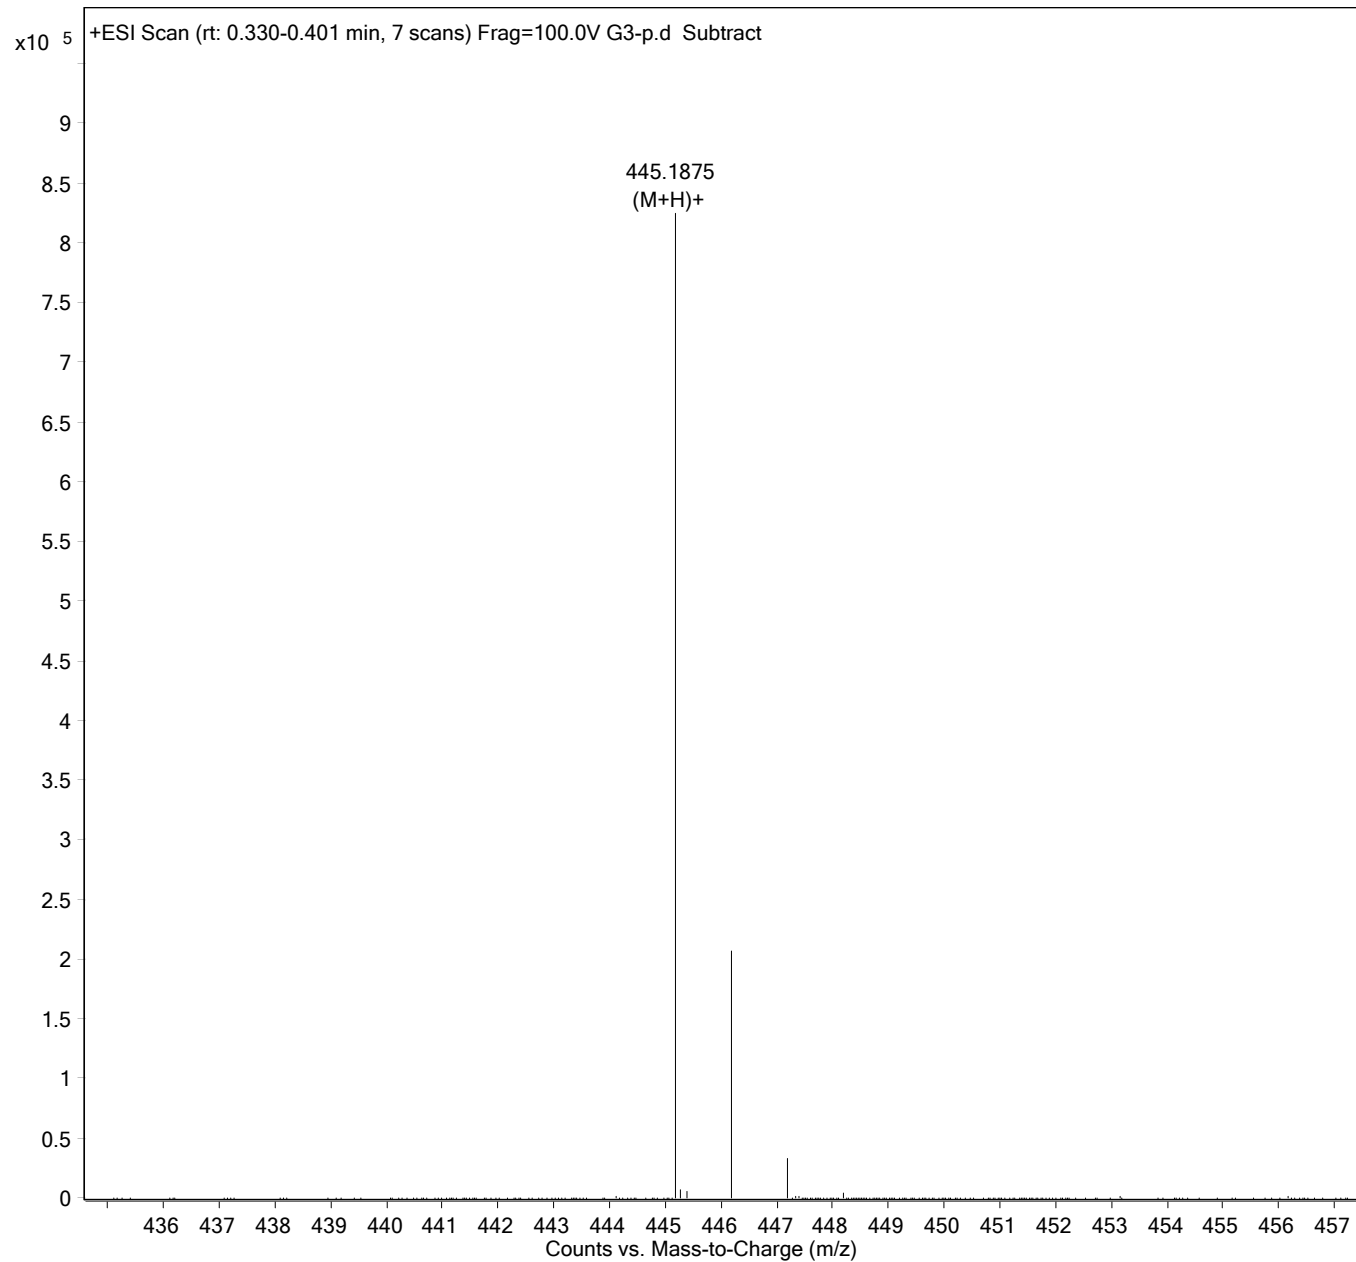

E8

SP131223-1-C C13-NMR DMSO 303K AV-300

171.309  
165.045  
161.677  
157.914  
155.578  
152.398  
151.391  
138.050  
131.339  
128.087  
127.475  
125.138  
124.324  
123.177  
117.066  
113.420  
112.189  
111.614  
109.837  
62.307  
40.195  
39.916  
39.633  
15.892

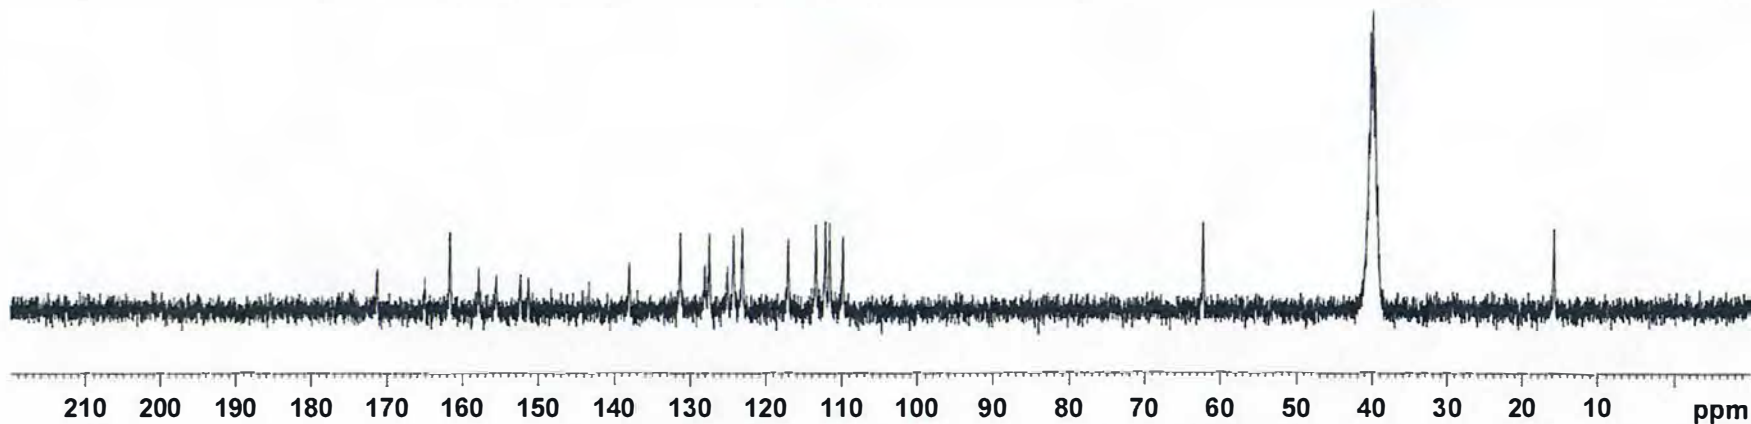

E8

SP130930-3 CDCL3 1HNMR AV300

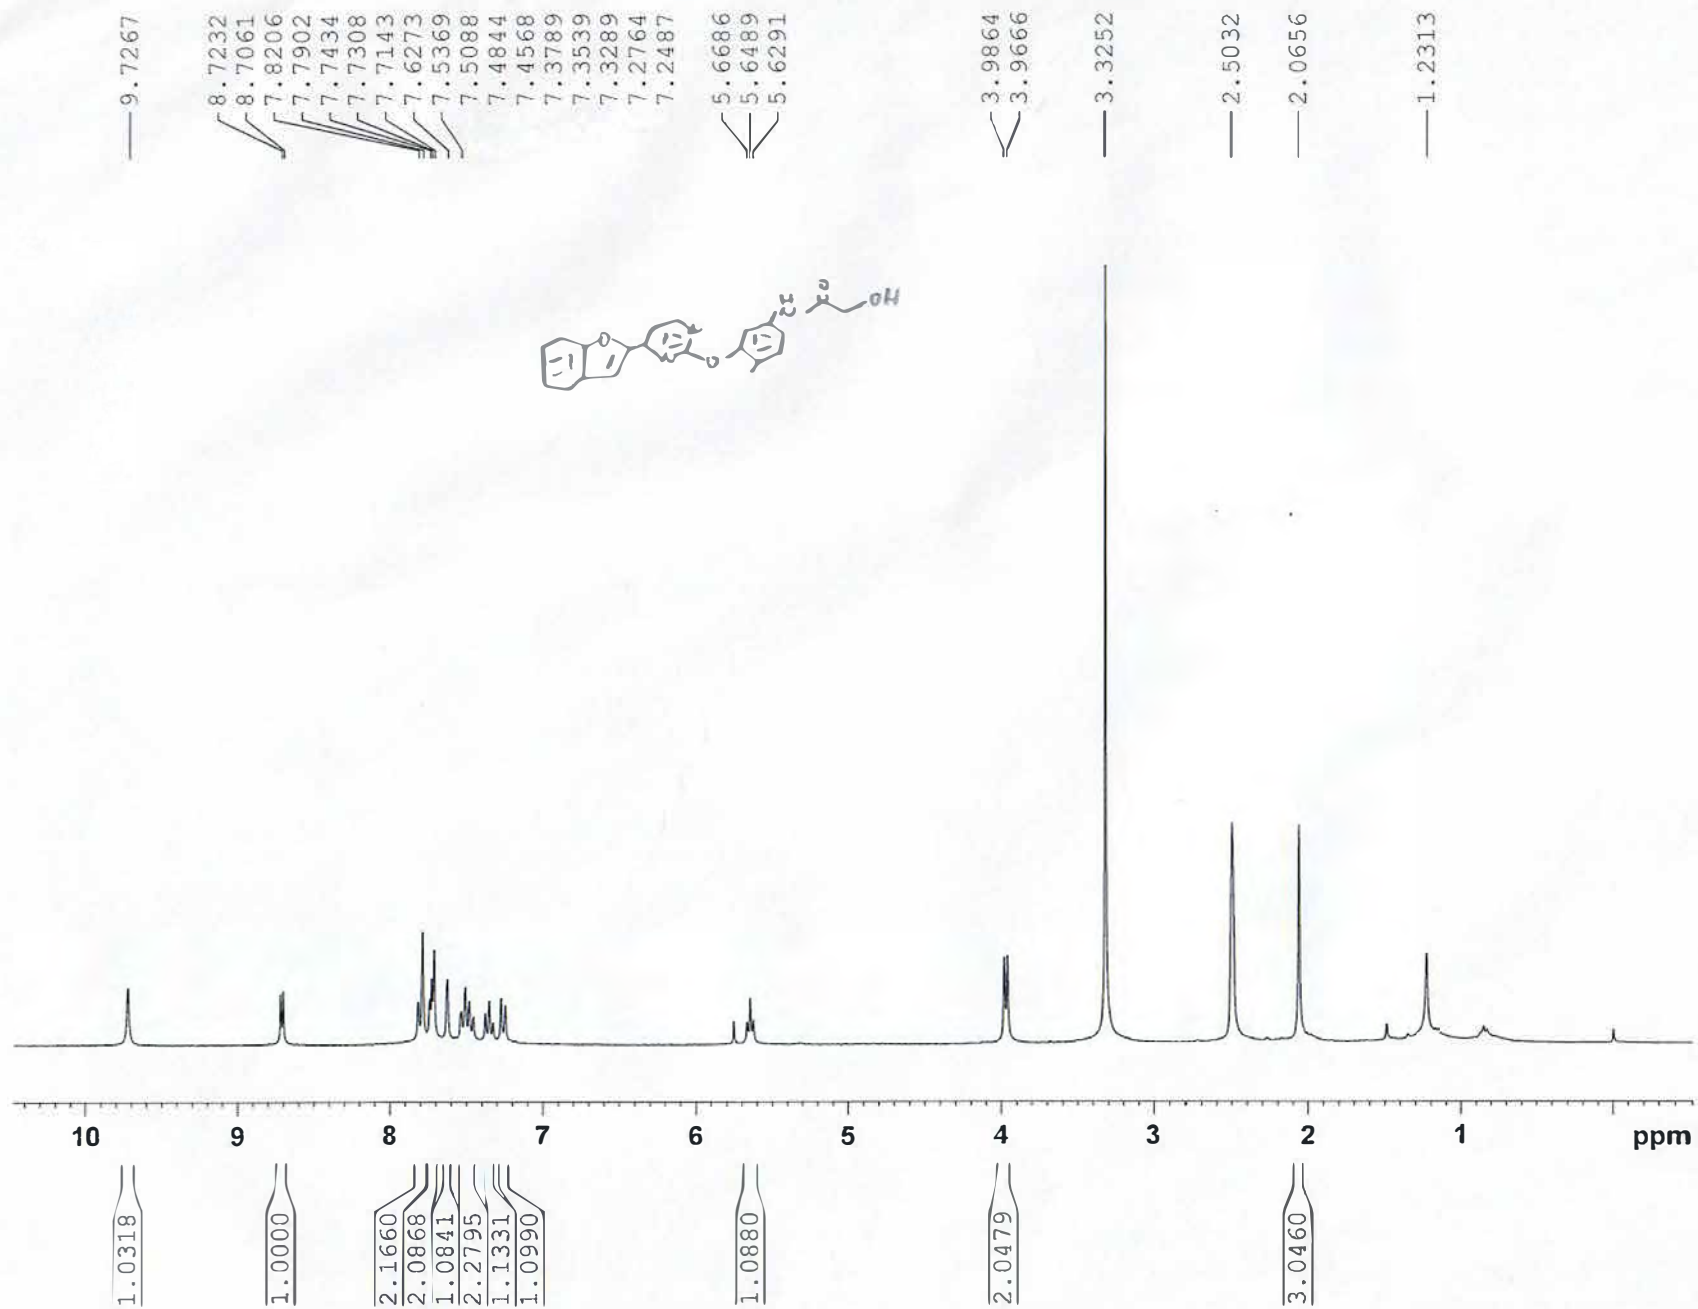



|                    |                     |                               |         |                        |                      |
|--------------------|---------------------|-------------------------------|---------|------------------------|----------------------|
| <b>Sample Name</b> |                     | <b>Position</b>               | P2a7    | <b>Instrument Name</b> | Instrument 1         |
| <b>User Name</b>   | QTOF-PC\QTOF        | <b>Inj Vol</b>                | 0.1     | <b>InjPosition</b>     |                      |
| <b>Sample Type</b> | Sample              | <b>IRM Calibration Status</b> | Success | <b>Data Filename</b>   | E8-p.d               |
| <b>ACQ Method</b>  | 20110418-MSonly-p.m | <b>Comment</b>                |         | <b>Acquired Time</b>   | 3/13/2018 1:56:22 PM |

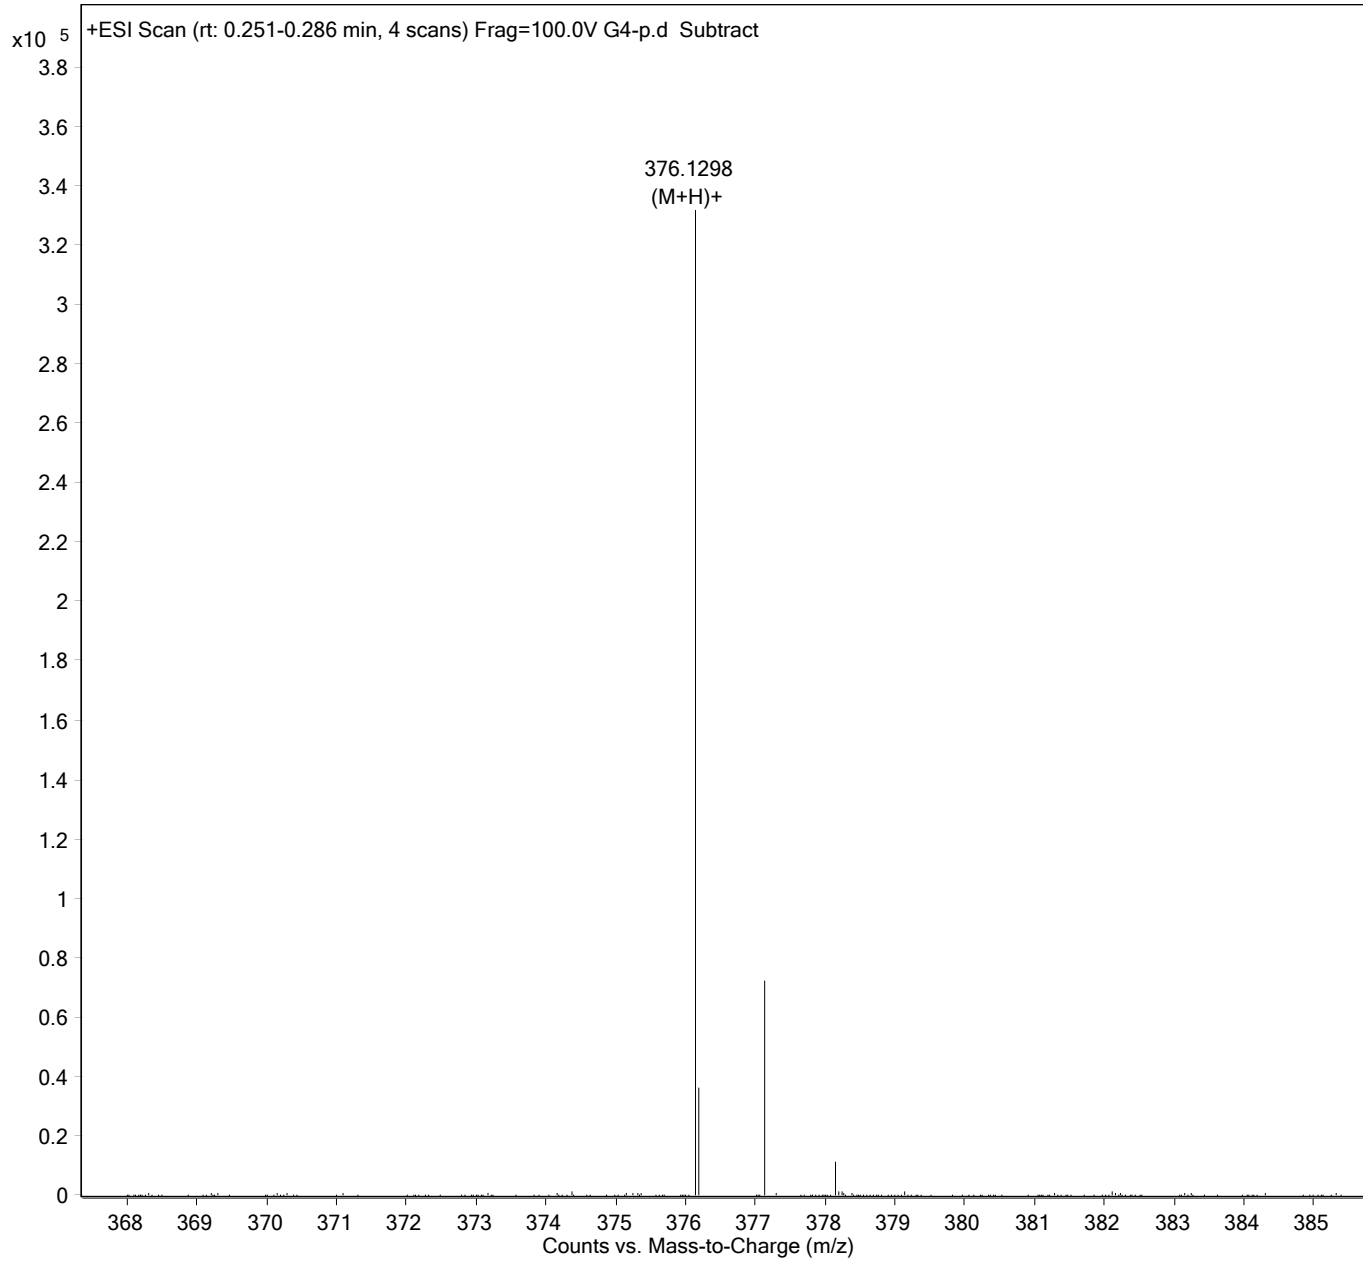

F1

SP1300701-C C13-NMR cdcl3 303K AV-300

168.663  
165.306  
164.588  
159.096  
151.965  
138.988  
138.045  
134.021  
131.307  
126.044  
125.111  
122.835  
122.711  
121.449  
116.210  
113.406  
112.077  
110.844  
110.772

40.575  
40.295  
40.017  
39.738  
39.462  
33.560  
24.435  
15.979

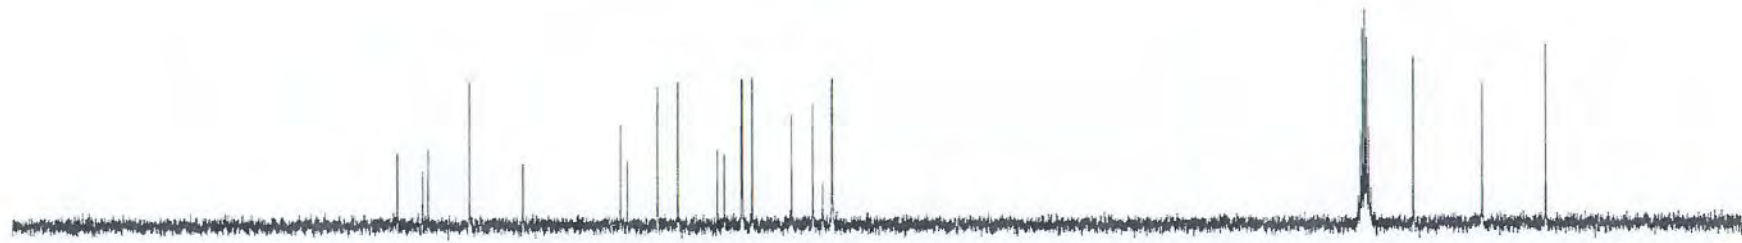

210 200 190 180 170 160 150 140 130 120 110 100 90 80 70 60 50 40 30 20 10 ppm

SP-20130701 DMSO 1HNMR AV300

8.4058  
7.9752  
7.8614  
7.8347  
7.7336  
7.7061  
7.5587  
7.5537  
7.5352  
7.5261  
7.4982  
7.4823  
7.4762  
7.4546  
7.4486  
7.3282  
7.3006  
7.2600  
7.2351  
7.2105  
7.0181  
6.9927  
6.9682  
5.7875

4.1131  
3.8823  
3.6475  
3.3868

2.5446  
2.5392  
2.3040  
2.2685  
2.0936  
2.0577  
1.8802  
1.8428

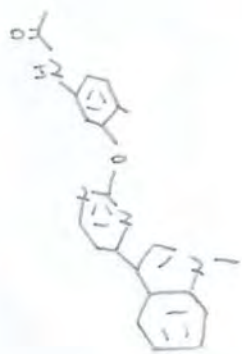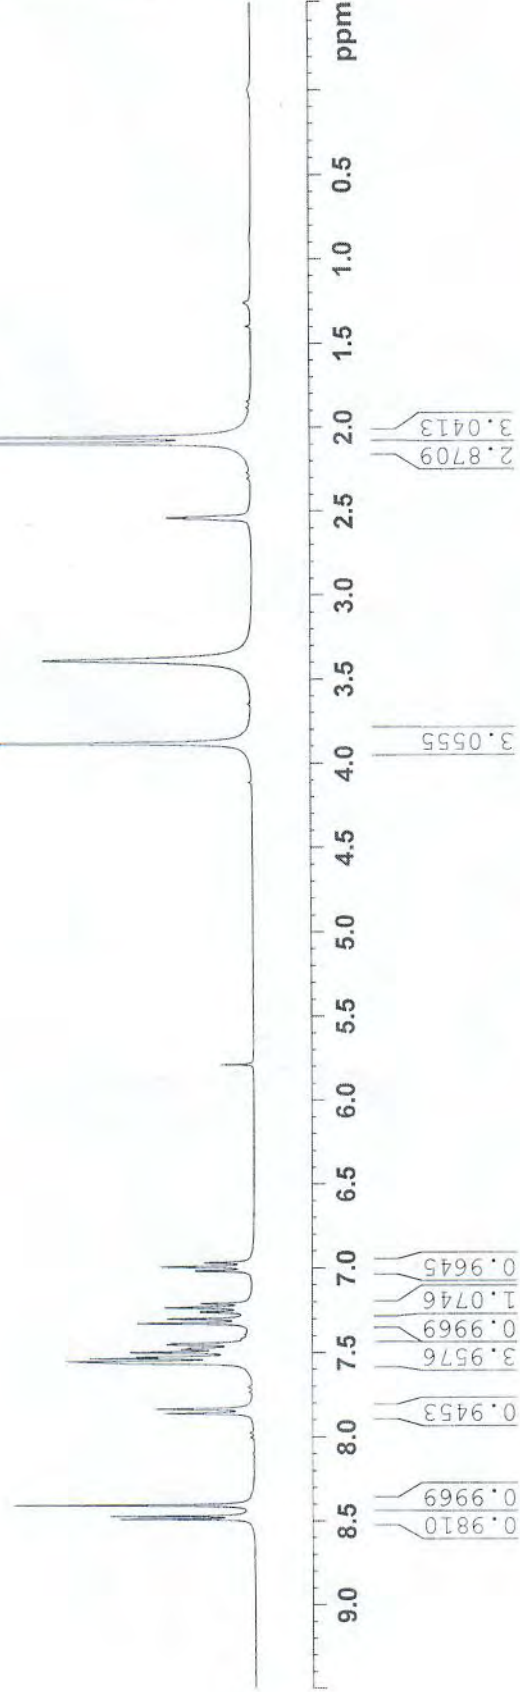

|                    |                     |                               |         |                        |                      |
|--------------------|---------------------|-------------------------------|---------|------------------------|----------------------|
| <b>Sample Name</b> |                     | <b>Position</b>               | P1C2    | <b>Instrument Name</b> | Instrument 1         |
| <b>User Name</b>   | QTOF-PC\QTOF        | <b>Inj Vol</b>                | 0.1     | <b>InjPosition</b>     |                      |
| <b>Sample Type</b> | Sample              | <b>IRM Calibration Status</b> | Success | <b>Data Filename</b>   | F1-p.d               |
| <b>ACQ Method</b>  | 20110418-MSonly-p.m | <b>Comment</b>                |         | <b>Acquired Time</b>   | 3/12/2018 4:38:05 PM |

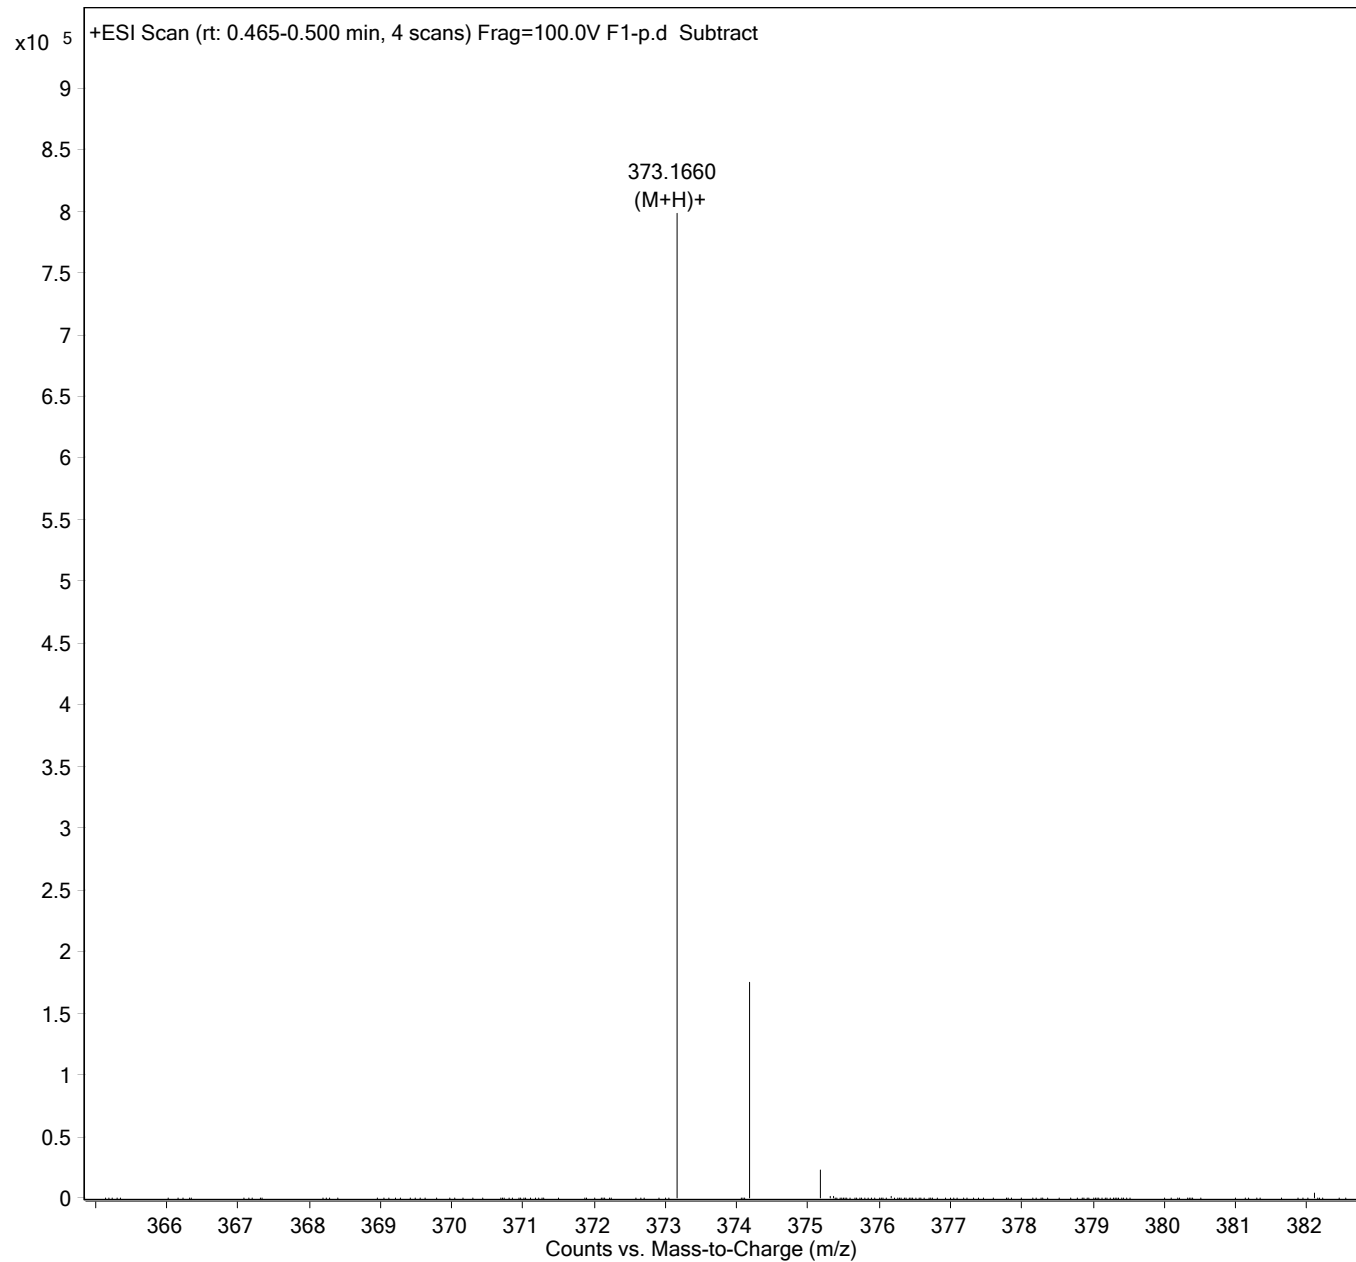

F2

## SP130703-3-C C13-NMR DMSO 303K AV-300

171.861  
164.814  
164.088  
158.601  
151.465  
138.536  
137.550  
133.533  
130.789  
125.539  
124.490  
122.324  
122.209  
120.941  
115.722  
112.938  
111.581  
110.348  
110.279  
40.349  
40.080  
39.799  
39.520  
39.242  
38.961  
38.690  
33.065  
29.477  
15.473  
9.573

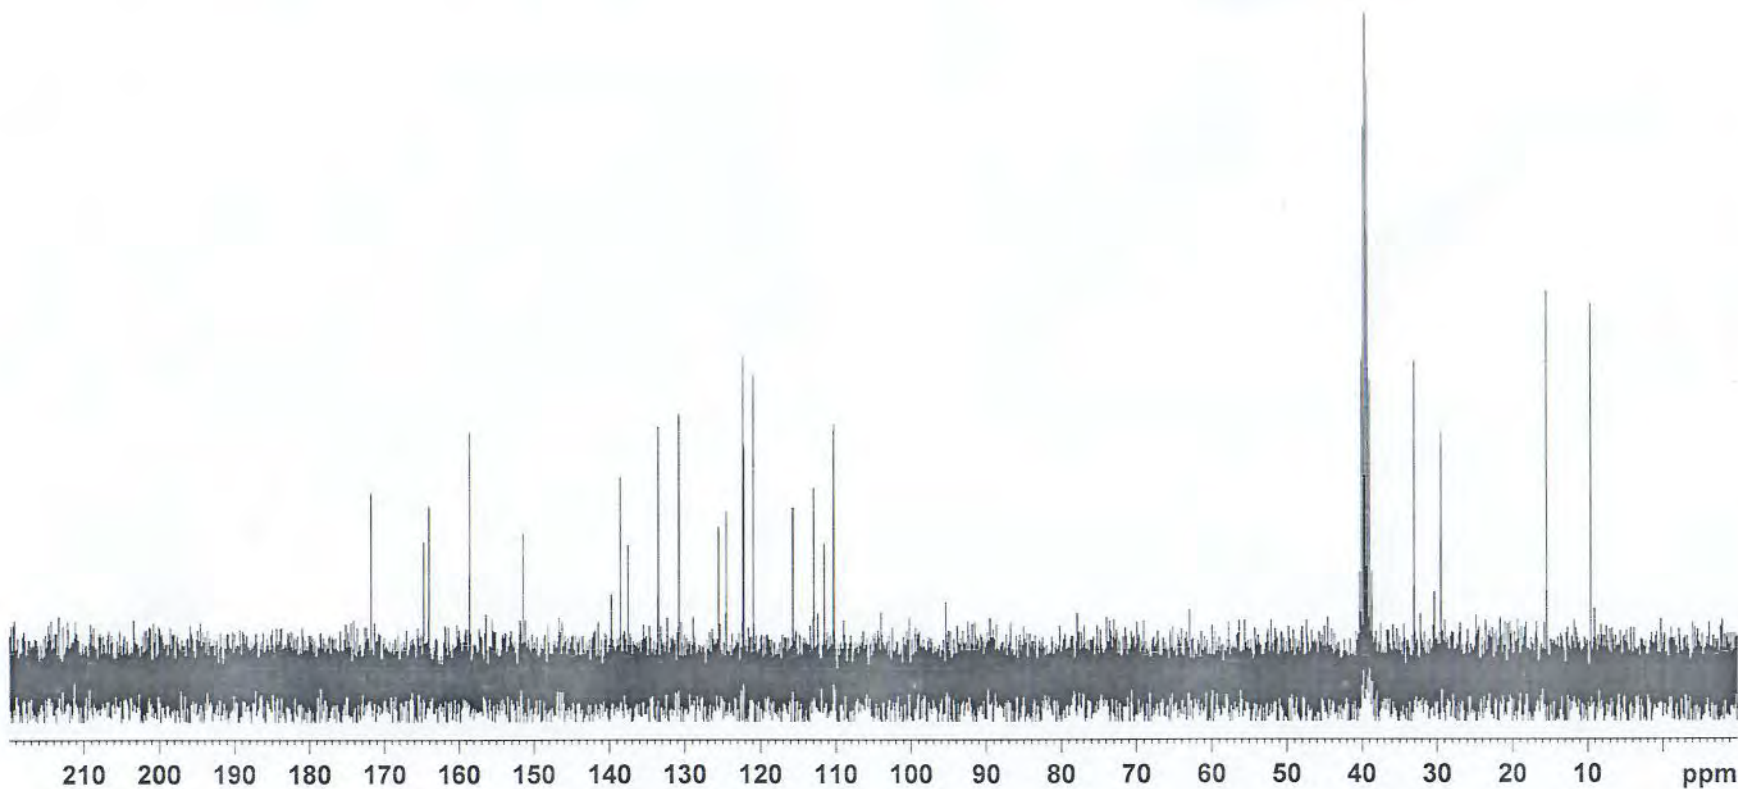

9.9110  
8.4536  
8.4357  
8.3783  
7.8305  
7.8038  
7.5437  
7.5376  
7.5210  
7.5030  
7.4941  
7.4662  
7.4541  
7.4329  
7.4264  
7.2904  
7.2626  
7.2230  
7.1991  
7.1749  
6.9792  
6.9549  
6.9307  
3.8508  
3.3330  
2.5097  
2.5039  
2.4980  
2.3320  
2.3069  
2.2818  
2.2568  
2.0590  
1.0799  
1.0549  
1.0297

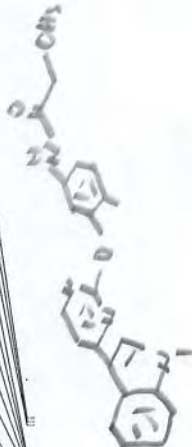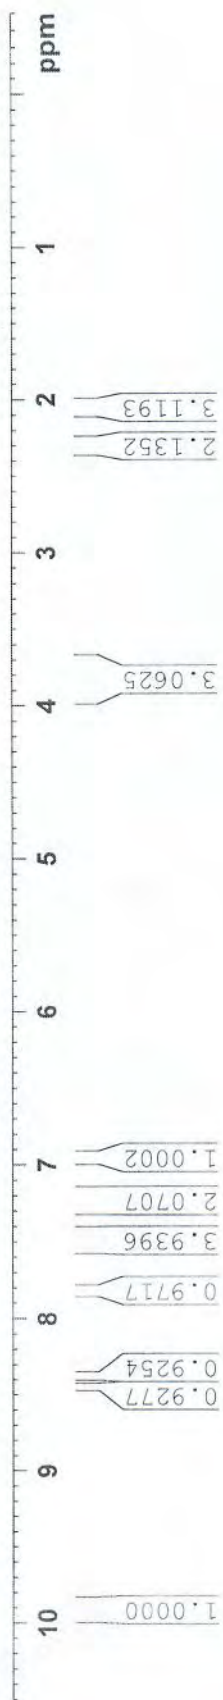

|                    |                     |                               |         |                        |                      |
|--------------------|---------------------|-------------------------------|---------|------------------------|----------------------|
| <b>Sample Name</b> |                     | <b>Position</b>               | P2a1    | <b>Instrument Name</b> | Instrument 1         |
| <b>User Name</b>   | QTOF-PC\QTOF        | <b>Inj Vol</b>                | 0.1     | <b>InjPosition</b>     |                      |
| <b>Sample Type</b> | Sample              | <b>IRM Calibration Status</b> | Success | <b>Data Filename</b>   | F2-p.d               |
| <b>ACQ Method</b>  | 20110418-MSonly-p.m | <b>Comment</b>                |         | <b>Acquired Time</b>   | 3/13/2018 1:42:53 PM |

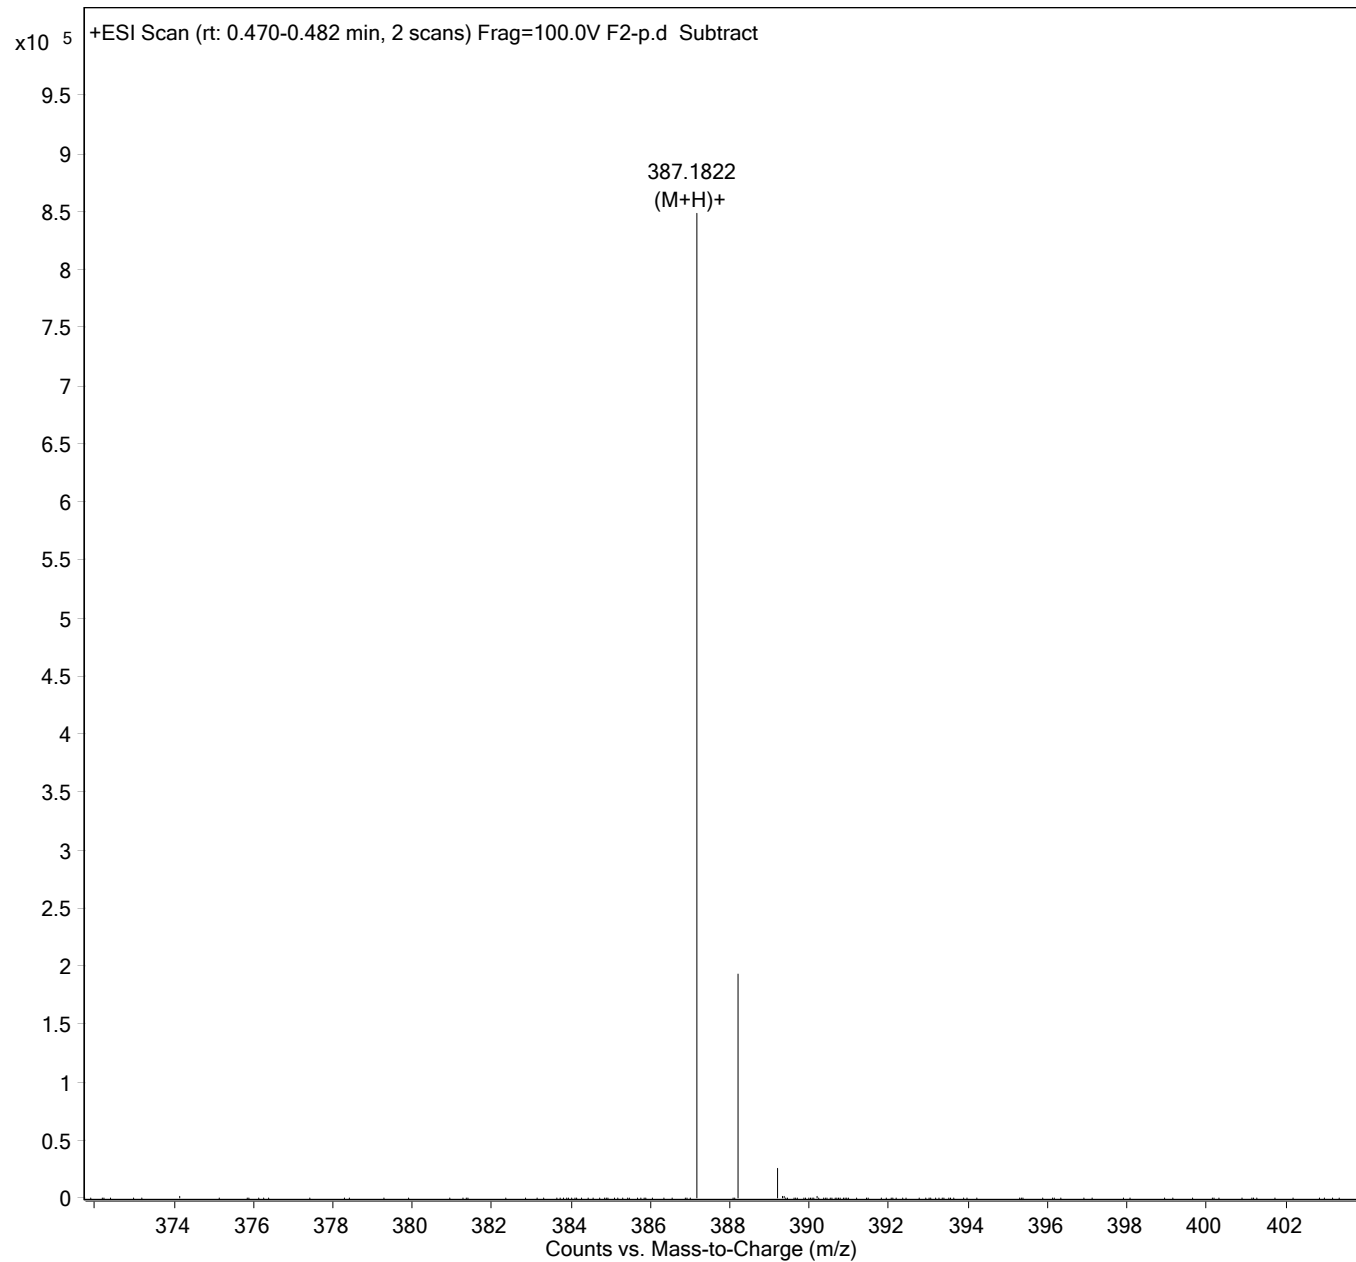

F3

SP130705-2-C C13-NMR DMSO 303K AV-300

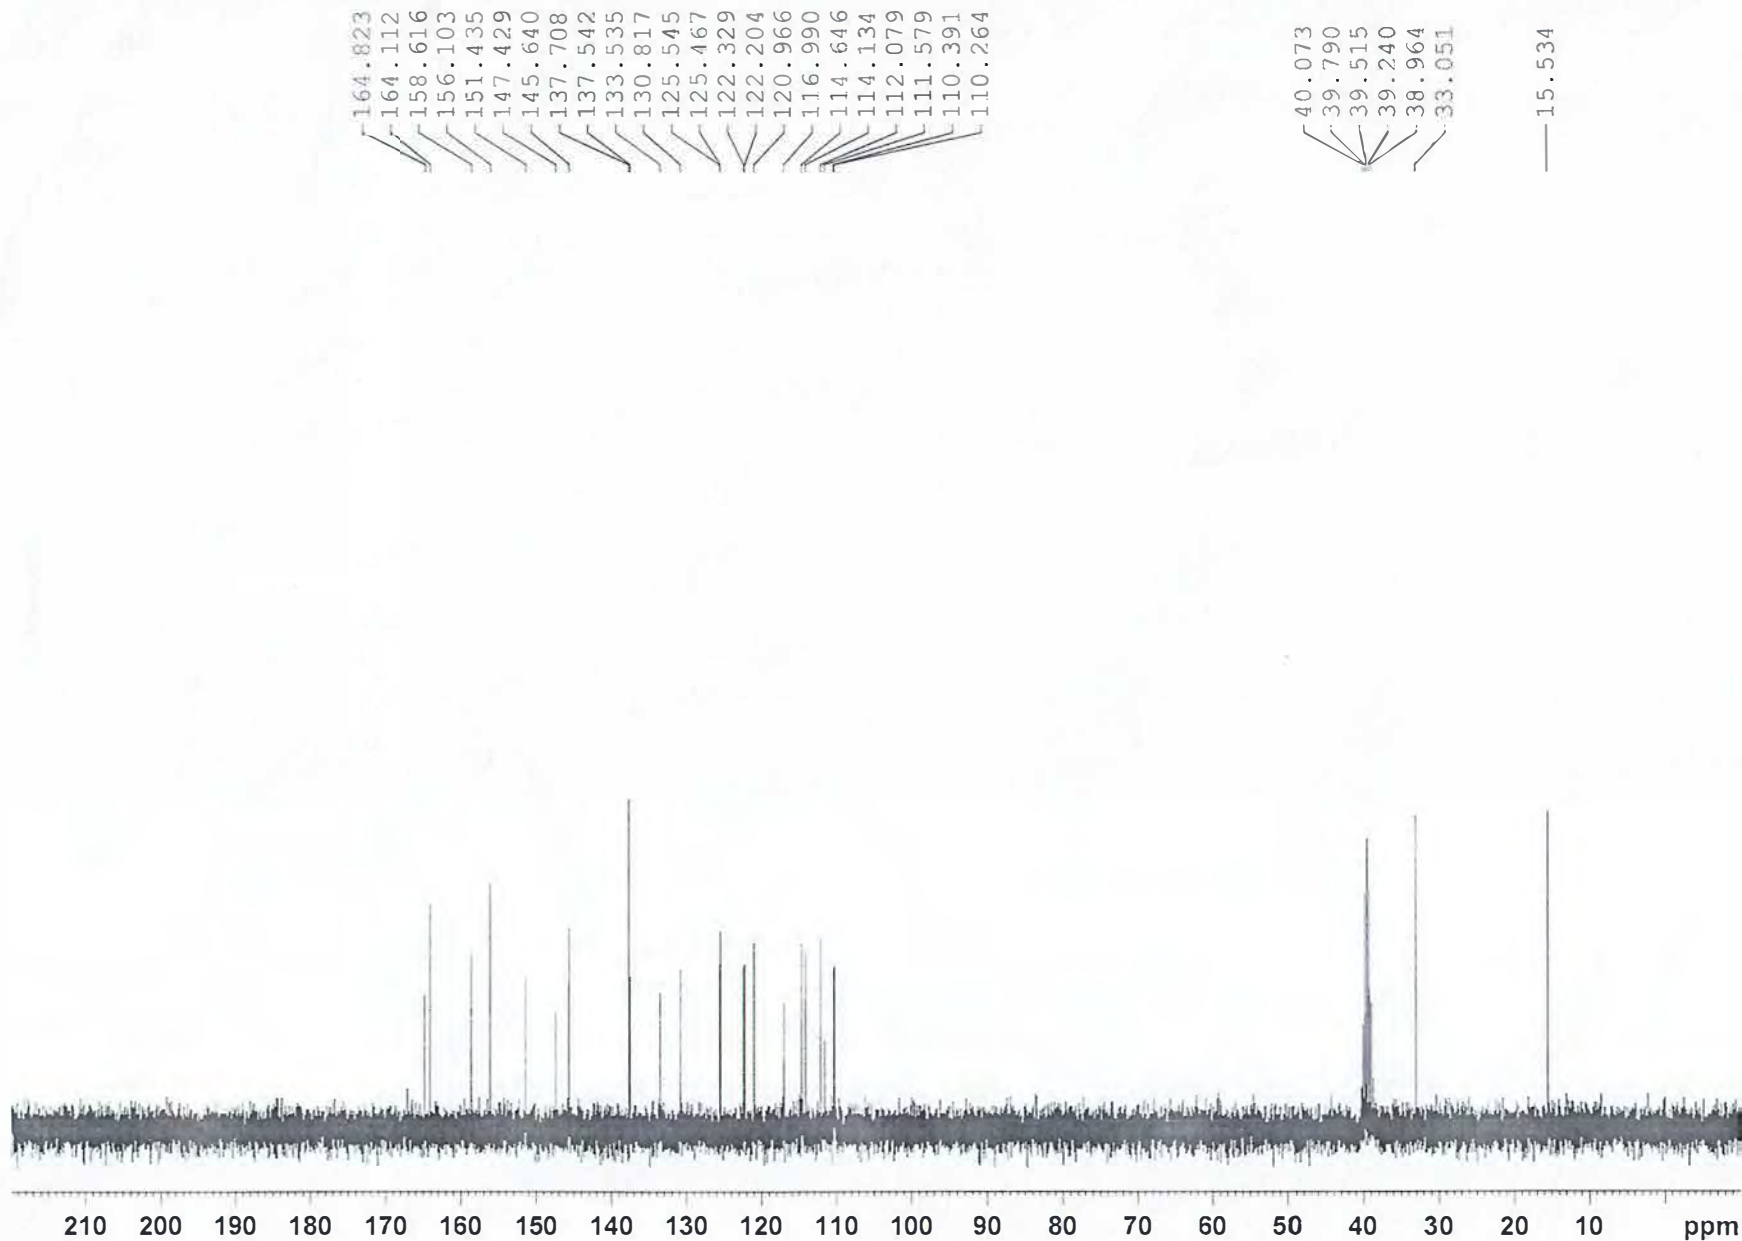



F3

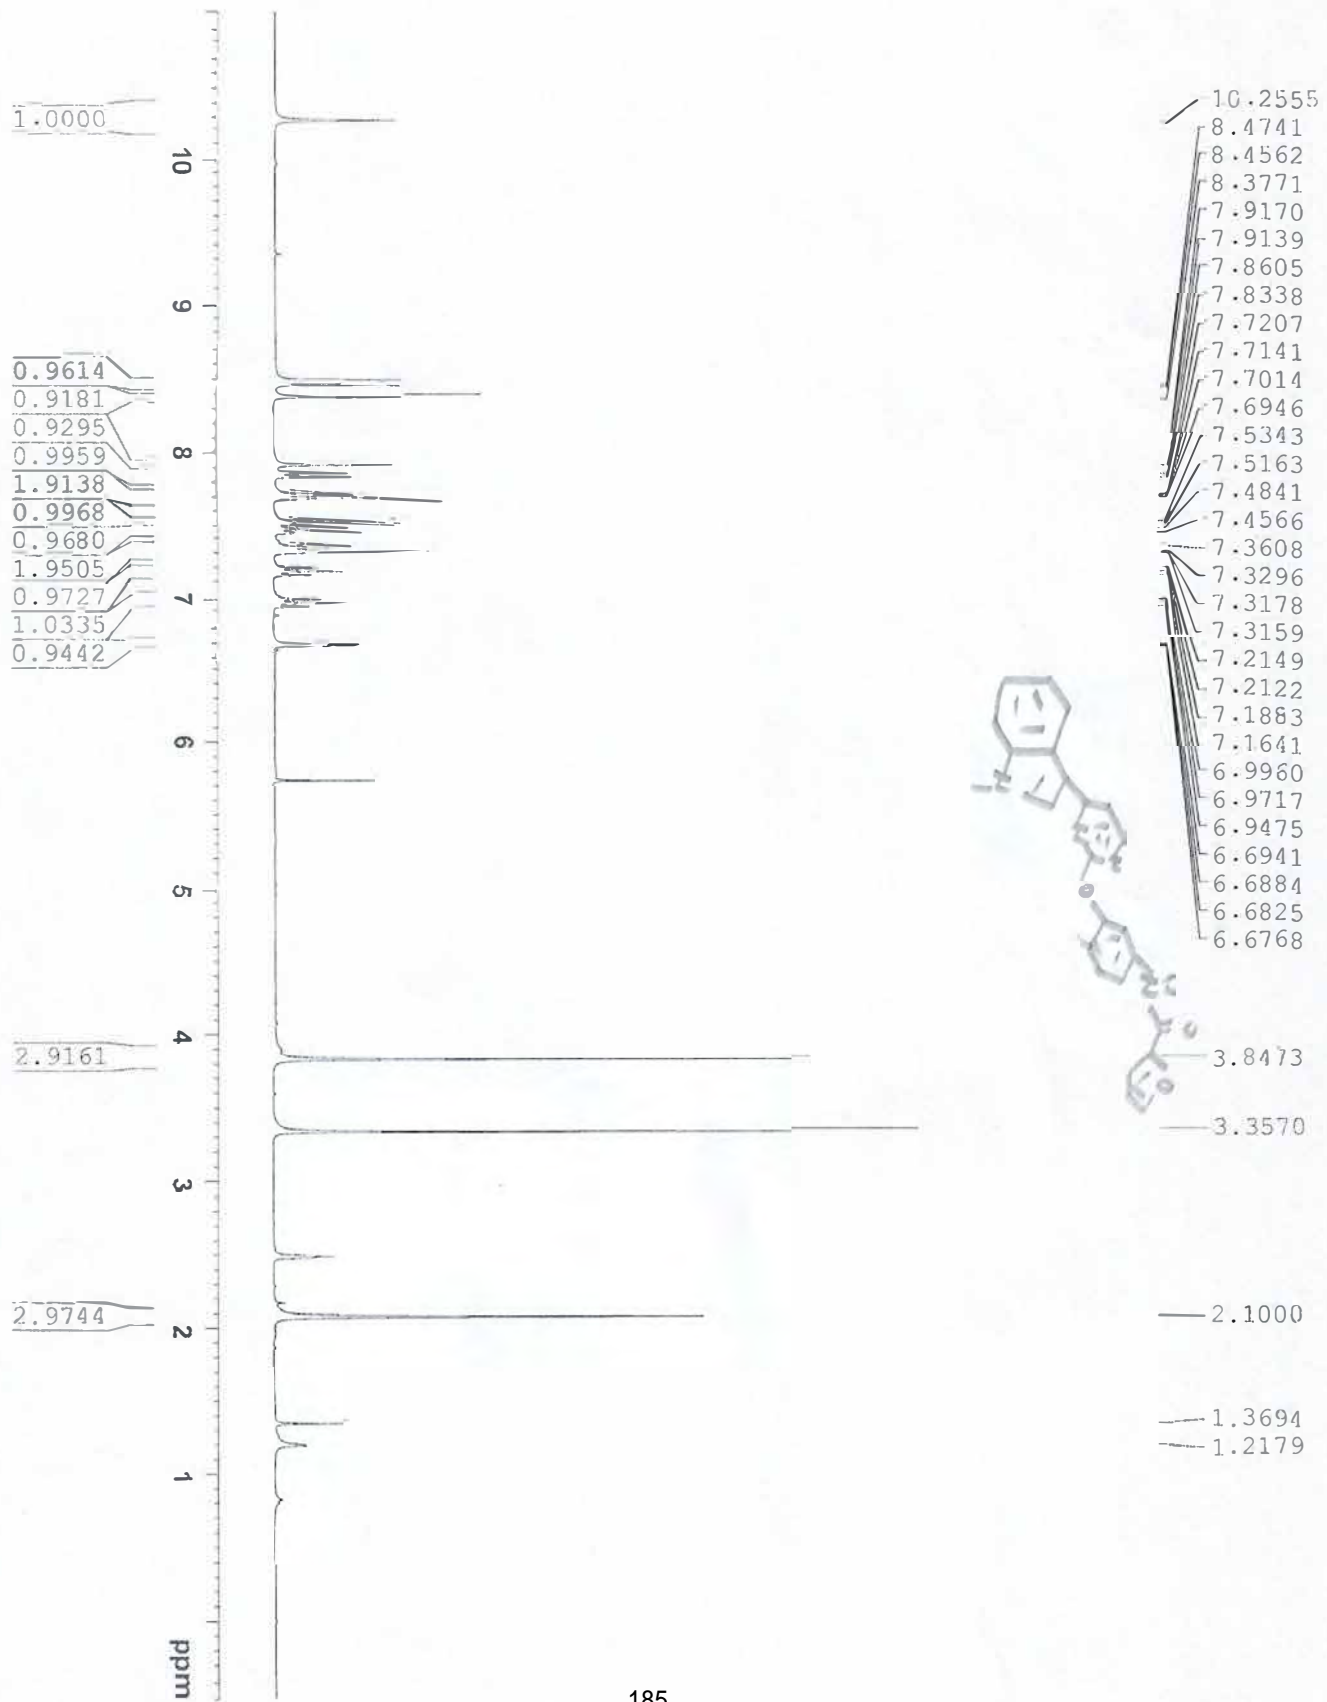

SP20130705-2 DMSO 1H NMR AV300

|                    |                     |                               |         |                        |                      |
|--------------------|---------------------|-------------------------------|---------|------------------------|----------------------|
| <b>Sample Name</b> |                     | <b>Position</b>               | P2a3    | <b>Instrument Name</b> | Instrument 1         |
| <b>User Name</b>   | QTOF-PC\QTOF        | <b>Inj Vol</b>                | 0.1     | <b>InjPosition</b>     |                      |
| <b>Sample Type</b> | Sample              | <b>IRM Calibration Status</b> | Success | <b>Data Filename</b>   | F3-p.d               |
| <b>ACQ Method</b>  | 20110418-MSonly-p.m | <b>Comment</b>                |         | <b>Acquired Time</b>   | 3/13/2018 1:46:49 PM |

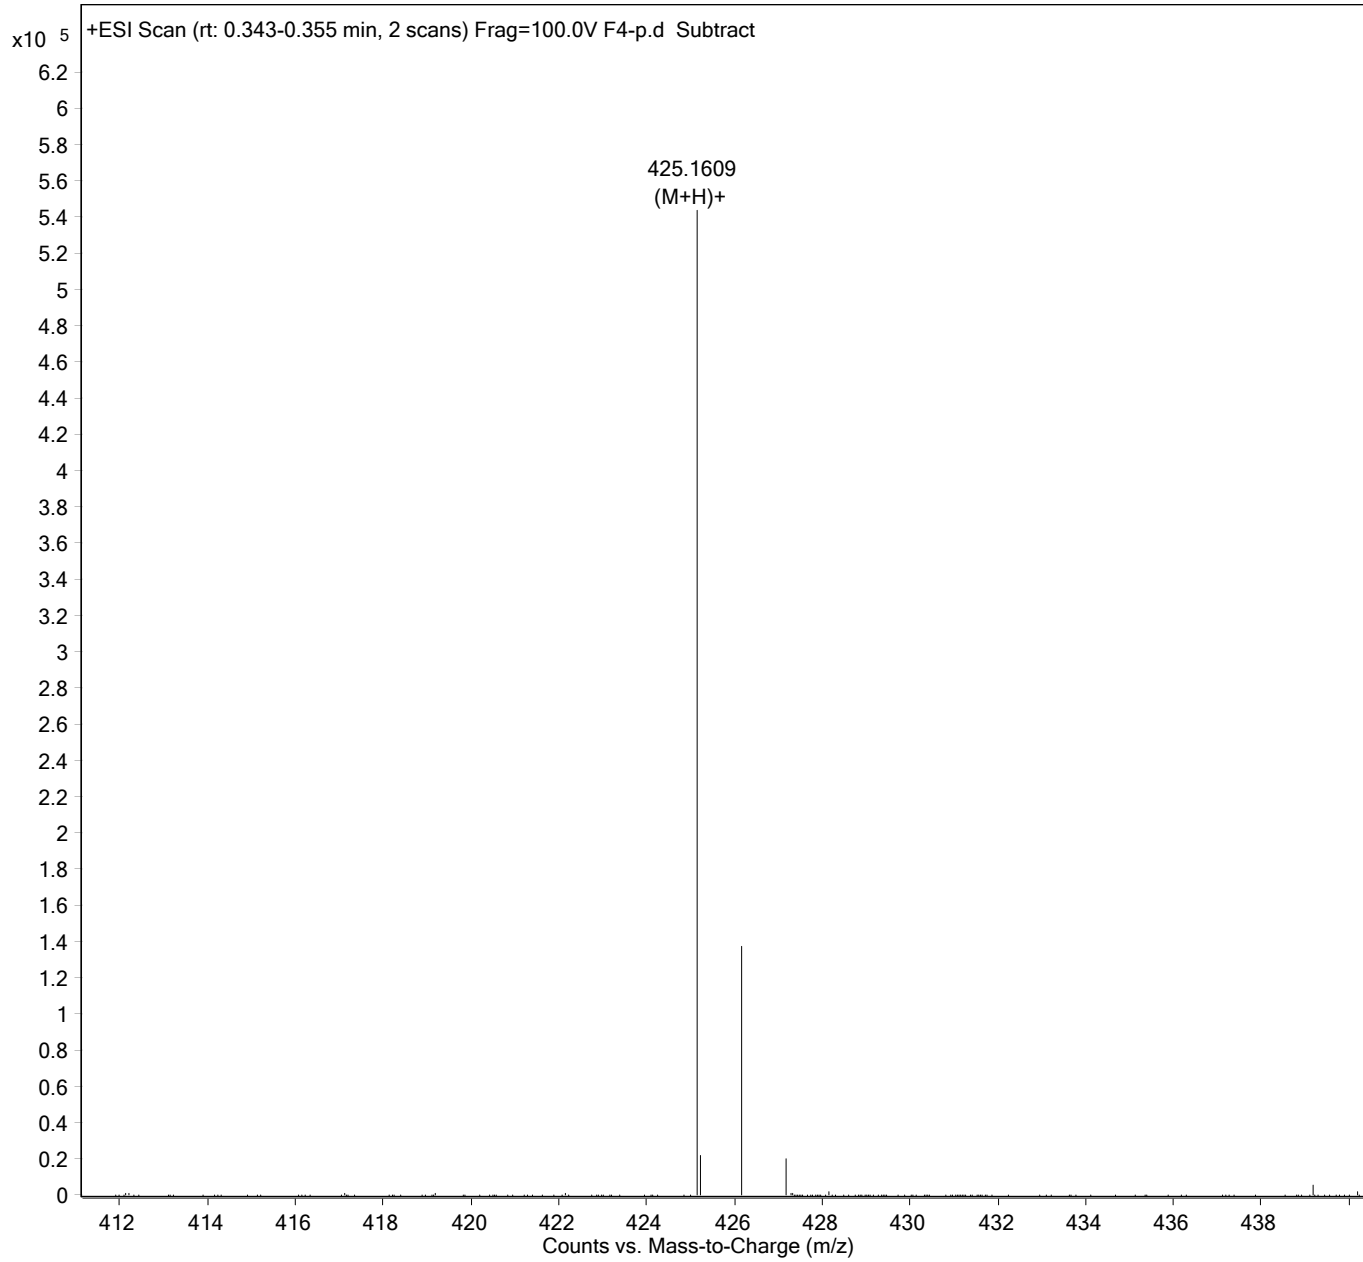

Supplement: 41598_2018_29199_MOESM1_ESM.pdf [file 41598_2018_29199_MOESM1_ESM.pdf]
